# Supplementary material for: The genome of the Hi5 germ cell line from Trichoplusia ni, an agricultural pest and novel model for small RNA biology
Source: eLife journal article supplement (doi:10.7554/elife.31628), 2018-01-29
Supplement: supp [file elife-31628-supp-v1.zip]

Archive with 21 entries (21 files):
- elife_poa_e31628_Supplementary_File_8.xlsx
- elife_poa_e31628_Supplementary_File_4.pdf
- elife_poa_e31628_Figure_1_figure_supplement_2.ai
- elife_poa_e31628_Figure_2_figure_supplement_2.ai
- elife_poa_e31628_Supplementary_File_6.xlsx
- elife_poa_e31628_Supplementary_File_10.pdf
- elife_poa_e31628_Figure_2_figure_supplement_1.ai
- elife_poa_e31628_Transparent_Reporting_File.docx
- elife_poa_e31628_Supplementary_File_1.xlsx
- elife_poa_e31628_Figure_1_figure_supplement_1.ai
- elife_poa_e31628_Figure_4_figure_supplement_1.ai
- elife_poa_e31628_Supplementary_File_2.xlsx
- elife_poa_e31628_Figure_5_figure_supplement_1.ai
- elife_poa_e31628_Supplementary_File_3.xlsx
- elife_poa_e31628_Figure_5_figure_supplement_2.ai
- elife_poa_e31628_Figure_1_figure_supplement_3.ai
- elife_poa_e31628_Figure_6_figure_supplement_1.ai
- elife_poa_e31628_Figure_4_figure_supplement_2.ai
- elife_poa_e31628_Supplementary_File_9.pdf
- elife_poa_e31628_Supplementary_File_7.xlsx
- elife_poa_e31628_Supplementary_File_5.xlsx
