# Supplementary material for: The genome of the Hi5 germ cell line from Trichoplusia ni, an agricultural pest and novel model for small RNA biology
Source: eLife journal article supplement (doi:10.7554/elife.31628), 2018-01-29
Supplement: supp [file elife-31628-supp-v1.zip › elife_poa_e31628_Supplementary_File_1.xlsx]

## Sheet: S1A BUSCO
	Percent of BUSCOs found
Species	Complete	Complete and single	Complete and duplicated	Fragmented	Missing	Total BUSCO groups searched
T. ni (cabbage looper)	0.974668	0.923402	0.0512666	0.00361882	0.0217129	1658
B. mori (silkworm)	0.954765	0.950543	0.00422195	0.0205066	0.0247286	1658
D. plexippus (monarch butterfly)	0.969843	0.896261	0.0735826	0.0193004	0.0108565	1658
P. xylostella (diamondback moth)	0.877563	0.727382	0.150181	0.0271411	0.0952955	1658
D. melanogaster (fruit fly)	0.996984	0.989747	0.00723764	0.00180941	0.00120627	1658
T. castaneum (red flour beetle)	0.992762	0.99035	0.00241255	0.00482509	0.00241255	1658
A. mellifera (western honney bee)	0.978287	0.973462	0.00482509	0.0126659	0.00904704	1658
	Number of BUSCOs found
Species	Complete	Complete and single	Complete and duplicated	Fragmented	Missing	Total BUSCO groups searched
T. ni (cabbage looper)	1616	1531	85	6	36	1658
B. mori (silkworm)	1583	1576	7	34	41	1658
D. plexippus (monarch butterfly)	1608	1486	122	32	18	1658
P. xylostella (diamondback moth)	1455	1206	249	45	158	1658
D. melanogaster (fruit fly)	1653	1641	12	3	2	1658
T. castaneum (red flour beetle)	1646	1642	4	8	4	1658
A. mellifera (western honney bee)	1622	1614	8	21	15	1658

## Sheet: S1B CRP
CRP genes
Large subunit proteins
CRP gene	Gene ID in T. ni	Drosophila gene name	Human gene
RPLP0	TNI004002	RpLP0	RPLP0
RPLP1	TNI003951	RpLP1	RPLP1
RPLP2	TNI013104	RpLP2	RPLP2
RPL3	TNI016167	RpL3	RPL3
RPL4	TNI002475	RpL4	RPL4
RPL5	TNI003531	RpL5	RPL5
RPL6	TNI013320	RpL6	RPL6
RPL7	TNI004799	RpL7	RPL7
RPL7A	TNI005213	RpL7A	RPL7A
RPL8	TNI003697	RpL8	RPL8
RPL9	TNI007942	RpL9	RPL9
RPL10	TNI014741	Qm/RpL10	RPL10
RPL10A	TNI003949	RpL10Aa	RPL10A
		RpL10Ab
RPL11	TNI000338	RpL11	RPL11
RPL12	TNI001527	RpL12	RPL12
RPL13	TNI007608	RpL13	RPL13
RPL13A	TNI000301 *	RpL13A	RPL13A
	TNI017321 *
RPL14	TNI000723	RpL14	RPL14
RPL15	TNI015887	RpL15	RPL15
RPL17	TNI013619	RpL17	RPL17
RPL18	TNI008787	RpL18	RPL18
RPL18A	TNI008773	RpL18A	RPL18A
RPL19	TNI007373	RpL19	RPL19
RPL21	TNI002123	RpL21	RPL21
RPL22	TNI005854	RpL22	RPL22
RPL23	TNI013727	RpL23	RPL23
RPL23A	TNI016111	RpL23A	RPL23A
RPL24	TNI011215 *	RpL24	RPL24
	TNI011354 *
RPL26	TNI015981	RpL26	RPL26
RPL27	TNI012036 *	RpL27	RPL27
	TNI012037 *
RPL27A	TNI002140	RpL27A	RPL27A
RPL28	TNI010496	RpL28	RPL28
RPL29	TNI003060	RpL29	RPL29
RPL30	TNI003674	RpL30	RPL30
RPL31	TNI001927	RpL31	RPL31
RPL32	TNI015664	RpL32	RPL32
RPL34	TNI014386	RpL34a	RPL34
		RpL34b
RPL35	TNI011708	RpL35	RPL35
RPL35A	TNI004061	RpL35A	RPL35A
RPL36	TNI005469	RpL36	RPL36
RPL36A	TNI007727	RpL36A	RPL36A
RPL37	TNI012575	RpL37	RPL37
RPL37A	TNI016327	RpL37A	RPL37A
RPL38	TNI016285	RpL38	RPL38
RPL39	TNI001919	RpL39	RPL39
RPL40	TNI014380	RpL40	RPL40
RPL41	group14:6081104-6081178(-)	RpL41	RPL41
Small subunit proteins
CRP gene	Gene ID in T. ni	Drosophila gene name	Human gene
RPSA	TNI003024	sta/RpSA	RPSA
RPS2	TNI001726	sop/RpS2	RPS2
RPS3	TNI017777	RpS3	RPS3
	TNI012957
RPS3A	TNI009290	RpS3A	RPS3A
RPS4	TNI006271	RpS4	RPS4X
			RPS4Y
RPS5	TNI003607	RpS5a	RPS5
		RpS5b
RPS6	TNI013541	RpS6	RPS6
RPS7	TNI004830	RpS7	RPS7
RPS8	TNI003919	RpS8	RPS8
	TNI003921
RPS9	TNI001154	RpS9	RPS9
RPS10	TNI001813	RpS10a	RPS10
		RpS10b
RPS11	TNI009916	RpS11	RPS11
RPS12	TNI017548	RpS12	RPS12
	TNI004801
RPS13	TNI010372	RpS13	RPS13
RPS14	TNI011065	RpS14a	RPS14
		RpS14b
RPS15	TNI013571	RpS15	RPS15
RPS15A	TNI016524	RpS15Aa	RPS15A
		RpS15Ab
RPS16	TNI010537	RpS16	RPS16
RPS17	TNI016620	RpS17	RPS17
	TNI013587
RPS18	TNI004506	RpS18	RPS18
RPS19	TNI006686	RpS19a	RPS19
		RpS19b
RPS20	TNI005087	RpS20	RPS20
RPS21	TNI010724	oho23B/RpS21	RPS21
RPS23	TNI005255	RpS23	RPS23
RPS24	TNI005906	RpS24	RPS24
RPS25	TNI014861	RpS25	RPS25
	TNI015107
RPS26	TNI014381	RpS26	RPS26
RPS27	TNI010079	RpS27	RPS27
RPS27A	TNI016943	RpS27A	RPS27A
RPS28	TNI008846	RpS28a	RPS28
		RpS28b
RPS29	TNI015145	RpS29	RPS29
RPS30	TNI015441	RpS30	RPS30

## Sheet: S1C OXPHOS
Complex I: NADH ubiquinone oxidoreductase
Protien description	Drosophila gene	FlyBase ID	T. ni gene ID	BLASTp e-value
13 KDA-A SUBUNIT	CG8680	FBgn0031684	group14:6942180-6942359(+)	8.75e-58
13 KDA-B SUBUNIT	CG6463	FBgn0047038	TNI012354	3.22e-121
15 KDA SUBUNIT	CG11455	FBgn0031228	TNI001534	1.46e-19
18 KDA SUBUNIT	CG12203	FBgn0031021	TNI001484	3.35e-64
19 KDA SUBUNIT	CG3683	FBgn0035046	TNI016689	4.71e-57
			TNI015143
20 KDA SUBUNIT	CG9172	FBgn0030718	TNI009123	6.27e-112
	CG2014	FBgn0039669	TNI003503	3.29e-90
23 KDA SUBUNIT	CG3944	FBgn0017567	TNI005911	2.15e-116
			TNI006926	5.18e-99
24 KDA SUBUNIT	CG5703	FBgn0030853	TNI008809	4.88e-121
	CG6485	FBgn0036706	TNI007683	1.58e-27
30 KDA SUBUNIT	CG12079	FBgn0266582	TNI015431	1.07e-129
39 KDA SUBUNIT	CG6020	FBgn0037001	TNI001812	1.44e-126
42 KDA SUBUNIT	CG6343	FBgn0019957	TNI004953	3.22e-121
49 KDA SUBUNIT	CG1970	FBgn0039909	TNI012856	0
	CG11913	FBgn0039331	TNI004320	2.41e-170
51 KDA SUBUNIT	CG9140	FBgn0031771	TNI011538	3.39e-72
	CG8102	FBgn0034007
75 KDA SUBUNIT	CG2286	FBgn0017566	TNI017069	0
ASHI SUBUNIT	CG3192	FBgn0029888	TNI003528	4.09e-36
B12 SUBUNIT	CG10320	FBgn0034645	TNI005046	7.76e-21
B14 SUBUNIT	CG7712	FBgn0033570	TNI009087	1.51e-41
B15 SUBUNIT	CG12859	FBgn0033961	TNI010371	4.61e-07
B17 SUBUNIT	CG13240	FBgn0001989	TNI012356	9.08e-54
B18 SUBUNIT	CG5548	FBgn0030605	TNI006043	5.3e-25
B22 SUBUNIT	CG9306	FBgn0032511	TNI004792	2.14e-62
B8 SUBUNIT	CG15434	FBgn0040705	TNI004013	2.83e-22
MLRQ SUBUNIT	CG32230	FBgn0052230	TNI004335	6.74e-42
MNLL SUBUNIT	CG18624	FBgn0029971	TNI013922	1.05e-12
PDSW SUBUNIT	CG8844	FBgn0021967	TNI002998	6.77e-66
SGDH SUBUNIT	CG9762	FBgn0011455	TNI016223	2.02e-61
B14.5A SUBUNIT	CG3621	FBgn0025839	TNI013244	2.06e-33
B14.5B SUBUNIT	CG12400	FBgn0031505	TNI008139	1.44e-22
B16.6 SUBUNIT	CG3446	FBgn0029868	group4:19227779-19229121(-)	2.78e-21
B17.2 SUBUNIT	CG3214	FBgn0031436	TNI014108	2.94e-63
ACYL CARRIER PROTEIN	CG9160	FBgn0011361	TNI012063	3.7e-39
Complex II: Succinate dehydrogenase
Protien description	Drosophila gene	FlyBase ID
FLAVOPROTEIN SUBUNIT	CG5718	FBgn0036222	TNI000356	0
			TNI013912	0
IRON-SULFUR PROTEIN	CG3283	FBgn0014028	TNI005573	3.68e-144
			TNI010504	3.29e-104
CYTOCHROME B560 SUBUNIT	CG6666	FBgn0037873	TNI015481	3.39e-48
			TNI013914	1.87e-25
CYTOCHROME B SMALL SUBUNIT	CG10219	FBgn0039112	TNI015009	1.73e-21
Complex III: Ubiquinol-cytochrome C oxidoreductase
Protien description	Drosophila gene	FlyBase ID
CYTOCHROME C1, HEME PROTEIN	CG4769	FBgn0035600	TNI008789	2.5e-135
11 KDA PROTEIN	CG30354	FBgn0050354	TNI013275	1.73e-20
14 KDA PROTEIN	CG3560	FBgn0030733	TNI012378	9.44e-47
	CG17856	FBgn0039576
6.4 KDA PROTEIN	CG14482	FBgn0034245	group13:11671802-11671942(+)	6.54e-09
7.2 KDA PROTEIN	CG8764	FBgn0011227	TNI000423	1.03e-15
CORE PROTEIN I	CG3731	FBgn0038271	TNI003608	2.51e-51
CORE PROTEIN 2	CG4169	FBgn0250814	TNI000680	1.52e-14
UBIQUINONE-BINDING PROTEIN QP-C	CG7580	FBgn0036728	TNI001854	6.02e-14
IRON-SULFUR SUBUNIT	CG7361	FBgn0021906	TNI004170	4.79e-92
Complex IV: Cytochrome c oxidase
Protien description	Drosophila gene	FlyBase ID
SUBUNIT IV	CG10396	FBgn0033020	TNI005354	1.89e-42
	CG10664	FBgn0032833
POLYPEPTIDE VA	CG14724	FBgn0019624	TNI012249	1.88e-59
POLYPEPTIDE VB	CG11015	FBgn0031830	TNI004979	6.09e-45
	CG11043	FBgn0031831	TNI010088	2.96e-14
POLYPEPTIDE VIA	CG17280	FBgn0034877	group12:8539438-8539977(+)	1.56e-12
POLYPEPTIDE VIB	CG18809	FBgn0042132	TNI000886	8.92e-18
POLYPEPTIDE VIC	CG14028	FBgn0015031	TNI004983	3.74e-16
POLYPEPTIDE VIIA-HEART	CG9603	FBgn0040529	TNI008087	3.65e-13
	CG18193	FBgn0037579
POLYPEPTIDE VIIC	CG2249	FBgn0040773	TNI013977	1.57e-18
Complex V: F0/F1 ATP synthase (13 genes, 15 copies)
Protien description	Drosophila gene	FlyBase ID
ALPHA CHAIN	CG3612	FBgn0011211	TNI001283	0
B CHAIN	CG8189	FBgn0019644	TNI012158	8.75e-58
BETA CHAIN	CG11154	FBgn0010217	TNI017103	0
	CG5389	FBgn0036568	TNI011352	0
COUPLING FACTOR 6	CG4412	FBgn0016119	TNI017168	9.98e-31
			TNI015039	9.98e-31
D CHAIN	CG6030	FBgn0016120	TNI008855	2.32e-76
			TNI009049	2.2e-53
DELTA CHAIN	CG2968	FBgn0028342	TNI007981	7.81e-56
E CHAIN	CG3321	FBgn0038224	TNI003393	4.83e-18
EPSILON CHAIN	CG9032	FBgn0014391	TNI012525	3.5e-22
	CG31477	FBgn0051477	TNI016470	1.95e-09
F CHAIN	CG4692	FBgn0035032	TNI003151	1.48e-60
G CHAIN	CG6105	FBgn0010612	TNI007333	1.37e-38
GAMMA CHAIN	CG7610	FBgn0020235	TNI013029	2.65e-148
			TNI013870	1.32e-94
LIPID-BINDING PROTEIN P1,P2,P3	CG1746	FBgn0039830	TNI015885	1.43e-49
OLIGOMYCIN SENSITIVITY CONFERRAL PROTEIN	CG4307	FBgn0016691	TNI008511	2.44e-85

## Sheet: S1D Animal genomes
	Statistics	Male T. ni	Female T. ni
	Number of scaffolds	451382	490008
	Total size of scaffolds	350256622	337646252
	Longest scaffold	58310	54842
	Sacffold N50	2404	1737
	Number of contigs	487917	531916
	Total size of contigs	347547323	334452056
	Longest contig	44183	51396
	Number of misassemblies *	1412	1163
	Misassembled contigs length *	5038101	3418287
	Misassembled contigs length / genome length*	0.0136831	0.00928378
	* Determined by QUAST; for contigs longer than 1 kb

## Sheet: S1E Gene counts
Gene counts in lepidoteran speices
Species name	Gene count
Trichoplusia ni	14034
Amyelois transitella	15208
Bicyclus anynana	22642
Bombyx mori	15488
Calycopis cecrops	16456
Chilo suppressalis	10117
Danaus plexippus	15130
Heliconius erato demophoon	13676
Heliconius erato lativitta	14613
Heliconius melpomene melpomene	20102
Lerema accius	17411
Limnephilus lunatus	13292
Operophtera brumata	16912
Papilio glaucus	15692
Papilio machaon	15497
Papilio polytes	12244
Papilio xuthus	15322
Phoebis sennae	16117
Plodia interpunctella	23136
Plutella xylostella	29902

## Sheet: S1F Telomeric repeats
Position of telomeric repeats (TTAGG)n long than 100nt
Contig ID	Start coordinate	End coordinate	Contig length	Distance to the nearest contig end	Number of nucleotides matching (TTAGG)n	Comment
tig00003877_pilon	0	3586	46358	0	3586
tig00001679_pilon	51265	53802	53802	0	2537
tig00002430_pilon	28411	29803	29803	0	1392
tig00000860_pilon	0	1211	41217	0	1211
tig00003612_pilon	120257	121150	121150	0	893
tig00003425_pilon	0	873	1767459	0	873
tig00004187_pilon	21342	21833	21833	0	491
tig00002326_pilon	0	217	10540	0	217
tig00004318_pilon	0	105	29898	0	105
tig00002393_pilon	25	136	3677	25	111
tig00003432_pilon	364242	364360	364453	93	118
tig00003457_pilon	199	310	23304	199	111
tig00001721_pilon	229402	229588	230404	816	186
tig00001543_pilon	41763	41952	43425	1473	189
tig00002179_pilon	13149	13524	15176	1652	375
tig00002326_pilon	8172	8600	10540	1940	428
tig00003797_pilon	27670	28314	30428	2114	644
tig00004319_pilon	7297	7717	10113	2396	420
tig00003458_pilon	19840	23510	26571	3061	3670
tig00001543_pilon	39727	39847	43425	3578	120
tig00003837_pilon	32599	32894	36587	3693	295
tig00001941_pilon	11374	11591	15599	4008	217
tig00004079_pilon	4687	4831	154018	4687	144
tig00003612_pilon	115862	116243	121150	4907	381
tig00000898_pilon	5390	5550	23408	5390	160
tig00003242_pilon	6055	6840	287156	6055	785
tig00001950_pilon	6359	6765	32271	6359	406
tig00004051_pilon	195457	195653	203095	7442	196
tig00003458_pilon	18481	19065	26571	7506	584
tig00003581_pilon	21125	21280	29151	7871	155
tig00003798_pilon	10885	11499	210888	10885	614
tig00003374_pilon	11436	12481	497979	11436	1045
tig00003456_pilon	1104610	1104722	1116937	12215	112
tig00000143_pilon	43518	43647	55959	12312	129
tig00003354_pilon	12587	13000	154291	12587	413
tig00003404_pilon	13665	14116	182102	13665	451
tig00003353_pilon	14140	14612	67820	14140	472
tig00000973_pilon	680035	680402	696006	15604	367
tig00003360_pilon	123938	124142	140375	16233	204
tig00001543_pilon	23675	24242	43425	19183	567	This contig has 3 (TTAGG)n regions

## Sheet: S1G Transposons in subtelomere
Transposons in T. ni subtelomeric regions
	Count	%	Total length	%
LINE/R1	150	0.485437	233283	0.491685
Unclassified	69	0.223301	9718	0.0204824
RC/Helitron	17	0.0550162	2694	0.00567808
DNA/hAT	10	0.0323625	1516	0.00319524
LTR/Copia	6	0.0194175	5120	0.0107913
LTR/Pao	5	0.0161812	10965	0.0231107
Others*	52	0.168285	16379	0.0345216
Sum	309		279675	0.589465
Total length of subtelomeric and telomeric regions:				474456
* Transposon families with fewer than 5 copies

## Sheet: S1H Repeat statistics
Repeat statistics in the T. ni genome
Type	Number of families	Number of copies	Length	% of the genome
DNA transposon	44	39208	7709565	0.0209379
LINE	84	50287	12432577	0.0337648
LTR	14	7844	5240721	0.0142329
RC (helitron)	25	49011	9275958	0.0251919
SINE	26	51243	7345218	0.0199484
Novel	263	NA	29756165	0.0808128
Low complexity	NA	NA	519320	0.00141039
Satellite	NA	NA	22597	6.13697e-05
Simple_repeat	NA	NA	2443395	0.00663585
Others (rRNA, snRNA, tRNA etc.)	2	874	579377	0.00157349
Total **	458		75326325	0.2046

## Sheet: S1I Transposon divergence rates
Divergence rates of transposon families
Family	Family-based divergence	Length	Order	Super family	Copy number	Comment
tn_6_1730	0.139358	326	Unknown	Unknown	50
tn_5_3347	0.169089	2508	DNA	piggyBac	262	T. ni piggyBac consensus sequence
tn_6_5300	0.410989	4158	DNA	hAT-Tip100	59
tn_5_2548	0.528094	1035	Unknown	Unknown	40
tn_3_481	0.678272	1791	Unknown	Unknown	160
tn_5_2226	0.770371	1296	DNA	TcMar-Fot1	117
tn_6_3720	0.839354	3220	Unknown	Unknown	98
tn_5_2547	1.06688	960	LINE	Penelope	73
tn_5_264	1.16034	1002	Unknown	Unknown	140
TED_LTR	1.31648	273	LTR	Gypsy	14
tn_5_483	1.35644	274	Unknown	Unknown	91
tn_6_3070	1.55956	1717	Unknown	Unknown	524
tn_5_35	1.60887	5928	LTR	ERVL	251
tn_3_17	1.61281	4808	RC	Helitron	676
tn_5_3315	1.63582	6201	LTR	Pao	64
tn_6_3759	1.6829	238	Unknown	Unknown	60
tn_5_2058	1.72676	1397	DNA	hAT-Tip100	87
tn_5_989	1.82062	1860	Unknown	Unknown	81
tn_5_416	1.87722	1287	Unknown	Unknown	200
tn_5_2270	1.93754	3128	LTR	Gypsy	177
tn_4_21	2.02387	1373	Unknown	Unknown	413
tn_5_71	2.14442	73	Unknown	Unknown	796
tn_5_257	2.22616	1096	Unknown	Unknown	154
tn_6_379	2.24491	632	Unknown	Unknown	90
tn_6_202	2.28659	1372	Unknown	Unknown	69
tn_5_482	2.44048	586	Unknown	Unknown	131
tn_5_809	2.5504	2602	DNA	DNA	106
tn_3_271	2.56555	325	Unknown	Unknown	599
tRNA-Phe-TTY	2.5813	76	tRNA	tRNA	20
tRNA-Pro-CCY	2.60565	75	tRNA	tRNA	26
tn_4_697	2.6113	1754	Unknown	Unknown	351
tn_6_3123	2.68637	1648	Unknown	Unknown	218
tn_5_2513	2.69728	420	Unknown	Unknown	148
TFP3	2.7403	831	DNA	PiggyBac	32
tn_4_2136	2.77357	227	Unknown	Unknown	438
tn_5_4027	2.78627	230	Unknown	Unknown	1904
tn_6_3528	2.8097	811	Unknown	Unknown	66
tn_2_954	2.87012	228	Unknown	Unknown	237
tn_5_1147	2.88733	559	Unknown	Unknown	168
tn_5_635	2.98777	894	Unknown	Unknown	123
tn_4_1753	3.00754	295	Unknown	Unknown	317
tn_6_252	3.09681	383	DNA	TcMar-Fot1	302
tn_6_443	3.15901	227	Unknown	Unknown	1793
tn_6_593	3.21802	218	Unknown	Unknown	26
tn_6_996	3.22004	1394	Unknown	Unknown	119
tRNA-Pro-CCA	3.22275	75	tRNA	tRNA	10
tn_6_2466	3.2429	44	Unknown	Unknown	49
tn_4_958	3.34662	4402	RC	Helitron	317
tn_4_16	3.45294	6534	LINE	Penelope	2501
bm_1747	3.4651	236	Unknown	Unknown	10
tRNA-Trp-TGG	3.47503	75	tRNA	tRNA	11
tn_5_2554	3.47941	469	Unknown	Unknown	161
tn_5_1207	3.48045	1002	Unknown	Unknown	116
bm_1837	3.52946	115	Unknown	Unknown	25
tn_5_5173	3.53737	416	Unknown	Unknown	97
tn_6_4122	3.63897	857	Unknown	Unknown	37
tn_5_418	3.64627	1577	LINE	Penelope	524
tn_6_1343	3.68834	1581	LTR	Copia	57
tn_4_502	3.70732	1593	Unknown	Unknown	255
tn_4_3	3.7986	1630	Unknown	Unknown	1118
tn_2_807	3.81662	320	Unknown	Unknown	1156
tn_5_1799	3.81945	7535	LTR	BEL	67
tn_5_893	3.8347	2411	DNA	TcMar-m44	101
tn_6_1807	3.92839	2474	DNA	TcMar-Tc1	41
tn_6_863	4.03992	323	DNA	CMC-EnSpm	51
tn_5_7415	4.06117	387	Unknown	Unknown	460
tn_3_1	4.07742	503	Unknown	Unknown	2115
tn_6_1419	4.0845	3015	LINE	R1	64
tn_5_279	4.19207	3553	DNA	PIF-Harbinger	182
tRNA-Gln-CAG	4.26335	75	tRNA	tRNA	14
tn_5_307	4.28977	275	Unknown	Unknown	69
tn_5_1615	4.29496	1403	Unknown	Unknown	220
tn_5_131	4.32512	1120	RC	Helitron	178
tn_5_7020	4.37291	865	Unknown	Unknown	227
tRNA-Leu-CTY	4.40073	85	tRNA	tRNA	12
tn_5_44	4.41508	109	Unknown	Unknown	650
tn_4_1474	4.54329	3940	LINE	Dong-R4	545
nMar-2_Hmel	4.57503	3608	DNA	DNA	15
tn_6_359	4.58597	253	Unknown	Unknown	99
tn_5_2850	4.88187	658	DNA	hAT-Ac	109
tn_6_2776	4.9402	673	LINE	CR1	45
tn_4_2335	4.97373	1962	DNA	Academ	386
tn_3_762	5.0095	1549	Unknown	Unknown	1987
tn_4_985	5.06706	2962	RC	Helitron	2389
tn_5_4098	5.13841	325	Unknown	Unknown	239
tn_6_841	5.13873	5440	RC	Helitron	799
tn_5_2068	5.14605	387	LINE	RTE-BovB	99
tn_6_116	5.25818	4397	DNA	PIF-Harbinger	142
tn_5_2208	5.28461	171	Unknown	Unknown	264
tn_4_598	5.30222	1012	LINE	Penelope	1780
tRNAGlyGGC_CB	5.4001	80	tRNA	tRNA	26
tn_5_3455	5.40102	2200	DNA	TcMar-Tc1	96
tn_6_746	5.54335	219	Unknown	Unknown	81
tn_3_389	5.7058	2962	DNA	hAT	2400
tn_5_623	5.79881	1119	Unknown	Unknown	135
HITCHHIKER	5.82231	582	DNA	PIF-Harbinger?	22
tn_2_33	5.84443	469	SINE	5S-Deu	2483
bm_338	5.84463	1747	DNA	Tc1_mariner	12
tn_4_1086	5.94373	4802	LINE	LOA	571
bm_413	5.96676	612	Unknown	Unknown	41
tn_6_4584	5.9903	91	Unknown	Unknown	55
tn_4_300	6.07494	383	Unknown	Unknown	16
tn_6_1070	6.20114	983	Unknown	Unknown	50
tn_3_13	6.27401	1984	Unknown	Unknown	10108
tn_6_479	6.3106	199	Unknown	Unknown	135
tn_5_62	6.33679	1829	RC	Helitron	313
tn_6_440	6.41693	1603	Unknown	Unknown	3672
tn_6_1884	6.42314	786	RC	Helitron	97
tn_6_2121	6.53493	4657	LTR	Gypsy	78
tn_5_681	6.53537	505	Unknown	Unknown	214
bm_1921	6.54692	108	Unknown	Unknown	18
tn_6_454	6.58509	188	Unknown	Unknown	53
bm_178	6.60146	273	Unknown	Unknown	11
tn_5_1163	6.62972	1671	LINE	R1	148
tn_6_1468	6.63767	214	Unknown	Unknown	76
tn_6_1717	6.7502	326	LTR	Gypsy	139
tn_4_769	6.77126	279	Unknown	Unknown	418
tn_6_2035	6.78718	564	SINE	5S-Deu	2064
tn_6_964	6.82806	235	Unknown	Unknown	67
tn_5_4556	6.85223	142	Unknown	Unknown	77
tn_3_971	6.87106	773	RC	Helitron	4452
tn_4_1680	6.90761	301	DNA	hAT-Tip100	672
tn_6_634	6.94027	169	Unknown	Unknown	70
tn_6_3691	7.00457	169	DNA	hAT-Ac	104
tn_2_311	7.03925	842	SINE	tRNA-Deu	3843
tRNA-Met-i	7.0956	75	tRNA	tRNA	19
tn_5_1328	7.26154	447	Unknown	Unknown	107
tn_6_4391	7.34923	466	LINE	L2	111
tn_6_4255	7.37773	175	DNA	hAT-Tip100	43
Nimb-4_DR	7.40127	9661	LINE	I	11
tn_5_1938	7.42066	2256	SINE	tRNA	321
tRNAAsnGTT_CB	7.45903	86	tRNA	tRNA	15
tn_6_1423	7.5219	84	Unknown	Unknown	67
bm_863	7.5491	247	Unknown	Unknown	15
tn_5_1426	7.57115	255	DNA	hAT-Tip100	63
tn_5_1064	7.63818	255	Unknown	Unknown	108
bm_1274	7.70894	1139	Unknown	Unknown	22
tRNACysGCA_CB	7.75741	84	tRNA	tRNA	12
tn_6_697	7.79396	412	RC	Helitron	986
tRNA-Lys-AAA	7.8199	76	tRNA	tRNA	16
tRNA-Ala-GCG	7.87637	75	tRNA	tRNA	17
tn_5_126	7.88552	2922	LINE	RTE-BovB	135
tn_5_869	7.89589	280	RC	Helitron	849
tn_5_1771	7.90887	151	Unknown	Unknown	117
tn_6_1069	7.92385	230	Unknown	Unknown	123
bm_709	7.92945	1363	SINE	Bm1	59
tn_6_436	7.9319	242	Unknown	Unknown	139
tn_6_598	7.94374	1226	Unknown	Unknown	123
tn_5_1025	8.05574	693	LINE	CRE-II	613
tRNA-Asp-GAY	8.12591	75	tRNA	tRNA	34
tn_6_1513	8.15583	356	Unknown	Unknown	84
tn_4_715	8.17238	334	LINE	RTE-BovB	1179
tn_5_1370	8.22988	460	DNA	CMC-EnSpm	138
tn_5_360	8.25277	243	Unknown	Unknown	276
tn_5_1832	8.3466	130	Unknown	Unknown	178
tn_5_14	8.38288	415	LINE	RTE-BovB	2167
tn_5_2465	8.3887	365	Unknown	Unknown	116
tn_3_70	8.46135	3515	Unknown	Unknown	6042
tn_6_4470	8.4623	4144	LTR	Pao	44
tn_5_566	8.51874	94	Unknown	Unknown	175
bm_449	8.54069	1283	Unknown	Unknown	20
Helitron-1_BM	8.59311	5072	RC	Helitron	81
tn_6_1345	8.6513	666	Unknown	Unknown	1041
tn_5_553	8.65561	772	Unknown	Unknown	202
tn_5_4598	8.796	242	Unknown	Unknown	98
tn_5_341	8.79838	286	Unknown	Unknown	183
tn_5_4624	8.80869	258	Unknown	Unknown	46
tn_2_254	8.9015	402	LINE	LINE	1650
tn_6_195	8.97506	8627	DNA	Maverick	256
tn_2_936	8.98561	224	Unknown	Unknown	1156
tn_6_237	9.0171	223	Unknown	Unknown	77
bm_559	9.01826	752	DNA	hAT	15
tn_5_202	9.05231	1089	Unknown	Unknown	201
tn_3_321	9.05614	246	Unknown	Unknown	342
tRNA-Met_	9.06952	76	tRNA	tRNA	11
tn_5_2621	9.07504	2624	LINE	CRE-II	105
tn_6_685	9.20087	228	LINE	RTE-RTE	1027
bm_971	9.3494	1017	Unknown	Unknown	19
tn_2_255	9.35106	505	RC	Helitron	3396
bm_120	9.35114	396	Unknown	Unknown	44
bm_1797	9.37449	849	Unknown	Unknown	14
tn_2_888	9.37921	246	Unknown	Unknown	1178
tn_5_842	9.46959	244	LINE	RTE-RTE	1488
tn_5_1383	9.51286	275	Unknown	Unknown	349
tn_5_701	9.53496	623	Unknown	Unknown	192
tn_6_1057	9.57819	403	LINE	RTE-BovB	185
tn_6_1046	9.58508	230	Unknown	Unknown	583
bm_2228	9.66619	129	Unknown	Unknown	23
tRNA-Gly-GGA	9.68641	75	tRNA	tRNA	13
tn_4_295	9.76992	307	Unknown	Unknown	1934
nMar-21_Hmel	9.78803	939	DNA	DNA	11
tn_4_11	9.80292	3217	LINE	L2	276
tRNA-Thr-ACA	9.81638	76	tRNA	tRNA	11
bm_698	9.82421	416	Unknown	Unknown	15
RTE-2_PD	9.8443	722	LINE	RTE-BovB	160
tn_4_1238	9.87196	279	Unknown	Unknown	1494
tn_4_512	9.97358	7197	DNA	TcMar-Mariner	212
tn_3_96	9.98103	605	LINE	CRE-II	901
tn_5_2091	10.0587	5734	LTR	Gypsy	213
tn_6_603	10.1402	4724	LTR	Copia	79
tn_3_94	10.1632	333	Unknown	Unknown	1145
tn_4_13	10.1716	11381	LINE	R1	1057
tRNA-Thr-ACY_	10.1775	77	tRNA	tRNA	16
tn_6_1460	10.198	202	Unknown	Unknown	90
tn_6_727	10.2469	326	DNA	hAT	4122
tn_4_1106	10.3727	570	LINE	L1-Tx1	197
bm_143	10.5261	608	Unknown	Unknown	69
tn_6_770	10.6411	1103	Unknown	Unknown	390
bm_1444	10.7271	197	Unknown	Unknown	320
tn_6_1000	10.7294	88	Unknown	Unknown	45
tn_5_686	10.7424	373	Unknown	Unknown	592
tn_4_60	10.7568	2411	DNA	TcMar-Mariner	1443
tRNA-Ile-ATT	10.7615	77	tRNA	tRNA	34
tn_4_48	10.776	929	RC	Helitron	414
tn_5_217	10.863	1375	LINE	LINE	196
tn_6_4187	10.9049	207	Unknown	Unknown	87
tRNA-Val-GTG	10.9076	76	tRNA	tRNA	15
tn_6_1142	10.9115	225	Unknown	Unknown	292
tn_5_3685	10.9257	364	Unknown	Unknown	140
tn_5_621	10.9566	502	Unknown	Unknown	251
tn_4_193	10.9659	6088	DNA	Maverick	334
tn_5_1250	11.0166	124	Unknown	Unknown	323
tn_4_626	11.0514	233	Unknown	Unknown	232
tn_5_834	11.054	6214	DNA	MuLE-MuDR	399
tn_5_760	11.0639	285	LINE	L2	828
tn_6_1028	11.0922	218	Unknown	Unknown	54
tn_2_988	11.1523	249	Unknown	Unknown	724
tn_6_3013	11.1692	760	Unknown	Unknown	691
tn_6_2432	11.1866	139	Unknown	Unknown	163
tn_4_214	11.1874	419	RC	Helitron	923
bm_50	11.2134	379	SINE	Bm1	31
tn_5_3807	11.2366	300	Unknown	Unknown	226
bm_981	11.3037	490	Unknown	Unknown	13
tn_6_272	11.3831	115	Unknown	Unknown	96
tn_5_871	11.4425	4222	LTR	Copia	44
tn_5_1189	11.4471	1914	LINE	L2	79
tn_5_1859	11.4577	3899	LINE	L2	204
tn_5_298	11.4755	100	Unknown	Unknown	372
tn_5_3886	11.4827	276	Unknown	Unknown	61
tn_5_547	11.5142	113	RC	Helitron	17
tn_6_228	11.5278	312	Unknown	Unknown	377
tn_5_220	11.6377	118	Unknown	Unknown	124
bm_256	11.6596	680	LINE	CR1	12
tn_5_133	11.7203	562	RC	Helitron	872
tn_5_843	11.8219	518	SINE	5S-Deu	1554
tn_6_1653	11.8635	448	LINE	L2	61
tn_5_722	11.8683	2608	RC	Helitron	727
tn_4_692	11.8851	1243	RC	Helitron	1877
Copia2-I_CR	11.8952	5509	LTR	Copia	17
tn_5_328	11.9098	201	LINE	RTE-BovB	233
tn_5_210	11.9959	867	Unknown	Unknown	90
tn_4_790	12.0126	155	Unknown	Unknown	426
tn_5_1570	12.0132	262	Unknown	Unknown	742
tn_4_274	12.0292	486	SINE	tRNA-Deu	2097
bm_1295	12.0637	477	Unknown	Unknown	20
tn_5_2273	12.0712	186	Unknown	Unknown	54
tn_5_841	12.0848	219	DNA	DNA	932
tn_5_132	12.1024	284	RC	Helitron	687
tn_4_73	12.1057	559	Unknown	Unknown	1463
tn_5_1243	12.108	598	LINE	I-Nimb	151
tn_5_558	12.1405	214	Unknown	Unknown	94
tn_6_2108	12.1672	83	Unknown	Unknown	17
tn_5_233	12.1895	257	Unknown	Unknown	314
tn_2_180	12.21	1931	LINE	L2	1714
tn_5_644	12.2487	299	RC	Helitron	228
tn_5_104	12.2709	1339	Unknown	Unknown	101
tn_3_254	12.2729	192	Unknown	Unknown	627
tn_5_2356	12.29	433	DNA	hAT-Tip100	130
bm_1056	12.3149	524	Unknown	Unknown	69
tn_6_98	12.3444	517	Unknown	Unknown	135
MAR1_BM	12.3625	1310	DNA	TcMar-Tc1	13
tn_4_1760	12.3696	222	Unknown	Unknown	480
tn_5_188	12.3974	265	Unknown	Unknown	351
bm_1030	12.4362	283	Unknown	Unknown	32
tn_5_886	12.4769	1661	LTR	Gypsy	221
bm_286	12.5051	526	Unknown	Unknown	1308
tRNA-Ser-TCG	12.5379	85	tRNA	tRNA	10
tn_4_272	12.5852	314	SINE	B2	6335
tn_6_437	12.6329	697	Unknown	Unknown	2641
tn_4_1029	12.6552	240	Unknown	Unknown	418
tn_4_53	12.6825	1310	Unknown	Unknown	778
tn_5_1203	12.736	287	Unknown	Unknown	4553
tn_5_95	12.7513	197	Unknown	Unknown	157
bm_640	12.7645	517	Unknown	Unknown	30
tn_3_183	12.7736	560	SINE	tRNA	2169
bm_2202	12.7941	305	Unknown	Unknown	24
tn_6_382	12.8894	1690	LINE	Dong-R4	24
tn_6_257	12.9105	691	LINE	I	68
bm_158	12.9156	263	Unknown	Unknown	51
tn_6_1967	12.9254	1056	DNA	Academ	76
DNA-8-3_HM	12.9568	2698	DNA	DNA	11
bm_102	12.9874	117	Unknown	Unknown	97
bm_1500	13.0205	660	Unknown	Unknown	335
tn_6_1943	13.0902	1565	LINE	L2	103
tn_6_1360	13.1568	270	Unknown	Unknown	1544
tn_4_276	13.1839	153	Unknown	Unknown	675
tn_6_1582	13.2018	956	LINE	L2	141
bm_1029	13.2091	526	Unknown	Unknown	23
bm_1711	13.2452	452	Unknown	Unknown	24
tn_6_267	13.3457	211	Unknown	Unknown	94
bm_673	13.3534	362	Unknown	Unknown	17
tn_5_1546	13.3613	826	Unknown	Unknown	752
tn_5_1263	13.3884	412	LINE	CRE-II	144
tn_3_374	13.3996	393	SINE	5S-Deu	2669
tn_5_2155	13.4896	1041	LINE	CRE-II	65
tn_3_131	13.496	476	Unknown	Unknown	1792
tn_5_786	13.5182	248	Unknown	Unknown	2643
tRNA-Ala-GCY	13.5883	76	tRNA	tRNA	29
bm_2132	13.6454	174	Unknown	Unknown	17
tn_5_243	13.7078	154	LINE	LINE	519
bm_241	13.7957	426	LINE	R1	35
tn_4_1093	13.8055	150	Unknown	Unknown	175
tn_6_1920	13.8319	596	LINE	CR1	87
tn_5_4741	13.8575	120	Unknown	Unknown	100
bm_604	13.8973	1152	Unknown	Unknown	58
tn_6_723	13.9207	321	SINE	tRNA	1896
bm_117	13.9617	1011	Unknown	Unknown	77
tn_5_1274	13.984	206	Unknown	Unknown	126
bm_432	14.0174	1808	LINE	Unknown	74
bm_32	14.1484	829	Unknown	Unknown	31
tn_6_408	14.1756	3623	DNA	PIF-ISL2EU	94
tn_4_42	14.2552	376	DNA	hAT	8480
tn_5_824	14.2661	4429	LTR	Gypsy	121
tRNA-Arg-AGG	14.2729	76	tRNA	tRNA	20
tn_4_122	14.3038	160	Unknown	Unknown	252
EnSpm-22_HMa	14.3228	5961	DNA	CMC-EnSpm	11
bm_1037	14.3329	3855	LINE	R1	12
bm_1287	14.3873	639	Unknown	Unknown	19
tRNA-Val-GTY	14.4566	76	tRNA	tRNA	15
tn_3_252	14.4623	132	Unknown	Unknown	808
tn_4_85	14.4772	523	Unknown	Unknown	2331
tn_5_735	14.4794	253	LINE	LINE	448
bm_151	14.5143	865	Unknown	Unknown	16
tn_5_1433	14.5265	76	Unknown	Unknown	87
tn_4_1442	14.5402	5653	LINE	I	259
bm_775	14.5473	612	Unknown	Unknown	17
tn_6_255	14.5632	546	SINE	tRNA-Deu	2933
tn_5_694	14.654	131	Unknown	Unknown	343
tn_4_2557	14.6754	210	Unknown	Unknown	460
bm_67	14.6872	2048	DNA	Tc1_mariner	13
tn_5_2009	14.6923	178	RC	Helitron	969
tn_5_27	14.7467	1071	Unknown	Unknown	2613
bm_1286	14.7581	215	Unknown	Unknown	24
tn_5_148	14.7944	8663	LINE	I	274
tn_3_234	14.8033	464	SINE	tRNA-Deu	1282
tn_4_251	14.9789	310	Unknown	Unknown	259
tn_4_266	15.0988	186	LINE	LINE	646
bm_98	15.1279	677	SINE	Bm1	20
tn_5_242	15.153	201	Unknown	Unknown	223
bm_49	15.2047	265	Unknown	Unknown	14
tn_5_232	15.2301	163	Unknown	Unknown	672
bm_339	15.2894	346	Unknown	Unknown	284
bm_348	15.35	467	Unknown	Unknown	190
bm_2258	15.3528	258	Unknown	Unknown	16
tn_4_582	15.3701	209	Unknown	Unknown	631
tn_6_442	15.4038	336	Unknown	Unknown	2427
tn_4_649	15.4676	496	Unknown	Unknown	5465
tn_5_1070	15.473	189	Unknown	Unknown	208
bm_1409	15.5069	440	Unknown	Unknown	10
tn_5_1439	15.5264	145	LINE	CR1	94
bm_351	15.5508	1195	Unknown	Unknown	41
tn_5_888	15.5678	184	Unknown	Unknown	98
tn_5_156	15.5776	343	Unknown	Unknown	474
tn_5_613	15.6133	193	Unknown	Unknown	319
tn_5_5510	15.6486	126	Unknown	Unknown	213
tn_5_805	15.7006	78	Unknown	Unknown	178
bm_1479	15.7043	1624	LINE	R1	46
tn_3_126	15.7483	359	Unknown	Unknown	1372
bm_517	15.7586	727	Unknown	Unknown	766
bm_1962	15.772	578	Unknown	Unknown	315
tn_6_166	15.7813	919	Unknown	Unknown	2527
tn_5_565	15.804	149	Unknown	Unknown	691
tn_5_59	15.8538	597	Unknown	Unknown	799
tn_6_137	15.8859	129	LINE	LINE	374
tn_6_1270	16.0043	299	Unknown	Unknown	99
bm_1000	16.014	572	Unknown	Unknown	108
tn_6_11	16.055	213	DNA	TcMar-Fot1	711
bm_468	16.058	867	Unknown	Unknown	27
tn_5_41	16.0638	208	DNA	TcMar-Fot1	2920
tn_3_221	16.0666	277	Unknown	Unknown	629
tn_4_336	16.0884	192	DNA	TcMar-Fot1	903
tn_5_432	16.1093	373	Unknown	Unknown	1784
bm_133	16.1231	638	Unknown	Unknown	72
tn_3_46	16.1481	264	DNA	TcMar-Fot1	1311
bm_747	16.1483	746	LINE	RTE	21
tn_2_160	16.1903	166	LINE	LINE	635
tn_5_1951	16.1952	189	LINE	L2	622
tn_5_371	16.1989	309	Unknown	Unknown	1089
bm_837	16.2279	1152	Unknown	Unknown	145
tn_5_1164	16.2468	360	Unknown	Unknown	1650
CACTA_LP	16.2531	12483	DNA	CMC-EnSpm	20
tn_5_405	16.2618	409	Unknown	Unknown	173
bm_1080	16.2641	500	Unknown	Unknown	16
bm_42	16.2834	372	Unknown	Unknown	222
tn_6_79	16.2843	233	Unknown	Unknown	1324
tn_6_70	16.303	557	SINE	tRNA	682
tn_5_934	16.3258	165	LINE	RTE-BovB	240
bm_254	16.344	737	Unknown	Unknown	40
tn_6_147	16.3556	361	LINE	RTE-BovB	278
tn_4_855	16.3775	371	Unknown	Unknown	1238
bm_554	16.3845	261	Unknown	Unknown	78
tn_5_518	16.3855	395	RC	Helitron	1484
tn_5_725	16.4387	294	Unknown	Unknown	16115
tn_4_910	16.4527	238	DNA	hAT	759
tn_3_205	16.4754	214	LINE	LINE	2177
tn_6_17	16.4903	158	SINE	5S-Deu	442
tn_5_364	16.4991	1751	LINE	RTE-BovB	51
bm_1129	16.5191	400	Unknown	Unknown	11
tn_5_1002	16.523	234	Unknown	Unknown	106
tn_3_114	16.5676	269	DNA	TcMar-Fot1	236
tn_5_434	16.5988	371	LINE	RTE-RTE	470
tn_2_100	16.6267	398	Unknown	Unknown	1490
tn_3_158	16.7372	328	Unknown	Unknown	492
tn_5_2126	16.7443	449	Unknown	Unknown	2159
tn_3_84	16.8299	344	Unknown	Unknown	1085
hAT-3_LMi	16.8304	4666	DNA	hAT-Tip100	30
tn_6_1415	16.8318	179	DNA	TcMar-Fot1	126
tn_6_807	16.852	117	Unknown	Unknown	145
tn_5_1569	16.8526	147	Unknown	Unknown	158
bm_274	16.8805	668	Unknown	Unknown	33
bm_1935	16.8968	505	Unknown	Unknown	15
tn_4_367	16.8968	387	Unknown	Unknown	6162
bm_553	16.9146	447	Unknown	Unknown	251
bm_1934	17.0019	355	Unknown	Unknown	14
tn_6_1376	17.0175	293	Unknown	Unknown	57
tn_6_649	17.0307	275	Unknown	Unknown	143
tRNA-Arg-CGA_	17.0328	76	tRNA	tRNA	24
tn_6_251	17.0539	211	Unknown	Unknown	85
tn_5_1846	17.07	921	Unknown	Unknown	523
tn_6_549	17.0768	123	Unknown	Unknown	1468
tn_4_340	17.0895	141	LINE	LINE	386
tn_5_1881	17.0967	189	Unknown	Unknown	138
tn_4_323	17.1483	478	DNA	TcMar-Fot1	584
bm_671	17.1605	1017	DNA	Tc1_mariner	66
bm_995	17.1627	1320	SINE	Unknown	14
tn_6_719	17.1758	328	Unknown	Unknown	3571
bm_168	17.1781	1479	Unknown	Unknown	64
tn_6_1104	17.1832	248	Unknown	Unknown	318
bm_48	17.2145	436	Unknown	Unknown	18
bm_597	17.2549	672	Unknown	Unknown	61
tn_4_195	17.2776	464	SINE	tRNA	1564
CR1-1_BF	17.2874	4878	LINE	CR1	49
tn_4_1191	17.3185	126	Unknown	Unknown	299
tn_4_478	17.3837	184	SINE	tRNA	1429
tn_5_1814	17.3929	164	Unknown	Unknown	260
tn_6_1117	17.449	378	Unknown	Unknown	305
EnSpm-N14_DR	17.4519	4580	DNA	CMC-EnSpm	10
tn_6_356	17.4689	923	LINE	LINE	1769
tn_6_114	17.481	180	DNA	TcMar-Tc1	95
tn_2_48	17.4956	147	Unknown	Unknown	777
bm_670	17.5196	522	Unknown	Unknown	40
bm_1827	17.526	553	Unknown	Unknown	403
tn_4_52	17.5474	260	Unknown	Unknown	663
bm_704	17.5512	779	Unknown	Unknown	358
tn_6_2488	17.5632	163	Unknown	Unknown	152
tn_3_774	17.5655	355	Unknown	Unknown	1356
bm_480	17.5823	1156	DNA	Tc1_mariner	77
LYDIA_LTR	17.5902	300	LTR	Gypsy	13
tn_5_1042	17.5935	135	Unknown	Unknown	108
tn_5_790	17.6307	306	Unknown	Unknown	293
bm_1656	17.664	230	Unknown	Unknown	12
tn_3_80	17.7006	2937	LINE	RTE-RTE	2229
bm_1736	17.7083	176	Unknown	Unknown	26
tn_6_2220	17.7177	184	Unknown	Unknown	92
tn_6_95	17.7269	130	LINE	LINE	238
tn_6_4734	17.7485	113	Unknown	Unknown	29
tn_5_531	17.7578	371	SINE	tRNA	3373
tn_3_123	17.7801	178	Unknown	Unknown	366
tn_5_144	17.8544	248	Unknown	Unknown	1311
tn_2_58	17.8713	284	SINE	tRNA	1585
tn_4_131	17.8727	362	Unknown	Unknown	500
tn_5_529	17.9516	168	Unknown	Unknown	129
nMar-9_Hmel	17.9782	1863	DNA	TcMar-Fot1	28
bm_390	18.0098	305	Unknown	Unknown	14
bm_70	18.0175	600	LINE	RTE	170
bm_11	18.0205	564	Unknown	Unknown	19
tn_4_793	18.042	259	LINE	RTE-RTE	1309
tn_5_2237	18.0513	315	Unknown	Unknown	1018
bm_88	18.0573	873	LINE	RTE	10
tn_3_102	18.0603	257	SINE	tRNA	983
Mariner-1_BM	18.0651	2386	DNA	TcMar-Mariner	33
EnSpm-5_HM	18.0874	8221	DNA	CMC-EnSpm	16
tn_4_291	18.1523	291	Unknown	Unknown	528
tn_4_2	18.1702	2192	LINE	L2	115
tn_3_306	18.1871	255	LINE	RTE-RTE	470
tn_5_1087	18.2247	329	LINE	LINE	991
tn_4_558	18.2735	159	DNA	DNA	976
bm_762	18.2735	634	Unknown	Unknown	20
tn_6_865	18.2948	168	Unknown	Unknown	165
Gypsy61-I_AG	18.2963	4551	LTR	Gypsy	11
tn_6_1090	18.3266	146	Unknown	Unknown	127
tn_6_3586	18.3472	163	Unknown	Unknown	34
tn_4_358	18.3807	313	Unknown	Unknown	375
bm_2125	18.3817	204	Unknown	Unknown	10
tn_5_154	18.4157	202	SINE	tRNA-Deu	166
tn_5_452	18.4245	218	Unknown	Unknown	111
HaSE1	18.453	385	SINE	tRNA-Deu	350
tn_4_2589	18.4869	2156	LINE	L2	589
tn_3_272	18.4913	315	Unknown	Unknown	516
bm_386	18.5003	350	Unknown	Unknown	79
bm_1166	18.5182	245	Unknown	Unknown	36
tn_5_374	18.533	252	DNA	hAT	344
tn_6_1378	18.5715	339	Unknown	Unknown	861
bm_1389	18.5924	1655	DNA	Tc1_mariner	50
bm_87	18.5951	800	LINE	RTE	179
tn_4_57	18.6154	124	Unknown	Unknown	259
tn_4_254	18.715	237	Unknown	Unknown	2402
tn_4_107	18.7538	141	Unknown	Unknown	434
ATCopia24I	18.7607	4707	LTR	Copia	16
bm_1342	18.7663	463	Unknown	Unknown	24
bm_147	18.7718	376	Unknown	Unknown	71
bm_1190	18.8054	260	LINE	RTE	300
bm_1091	18.815	342	Unknown	Unknown	72
Daphne-18_HM	18.8223	5211	LINE	L2	24
bm_1731	18.8301	3202	LINE	RTE	516
tn_5_1751	18.8347	202	SINE	tRNA-Deu	449
tn_6_1268	18.846	372	SINE	tRNA	2238
bm_422	18.8665	2076	DNA	helitron	84
tn_5_1611	18.8708	179	Unknown	Unknown	225
bm_283	18.8924	240	Unknown	Unknown	234
bm_68	18.8999	1101	Unknown	Unknown	15
tn_5_108	18.9186	1021	LINE	RTE-RTE	165
bm_1739	18.9682	251	Unknown	Unknown	24
bm_1532	18.9719	1776	DNA	Helitron	299
tn_6_9	18.9725	728	Unknown	Unknown	1415
bm_568	18.9775	1186	LINE	R4	75
bm_985	18.9795	1920	Unknown	Unknown	135
tn_4_89	18.9897	158	Unknown	Unknown	2159
tn_4_102	18.9983	3389	LINE	L2	532
bm_109	19.002	1304	LINE	RTE	22
EnSpm-N13_DR	19.0287	22149	DNA	CMC-EnSpm	16
ENSPM-6_DR	19.0541	32616	DNA	CMC-EnSpm	32
bm_751	19.0895	345	Unknown	Unknown	307
tn_3_89	19.0982	315	Unknown	Unknown	1301
hAT-2_HM	19.131	4435	DNA	hAT-Tag1	16
tn_5_69	19.1371	161	Unknown	Unknown	238
Mariner-3_BM	19.2047	1280	DNA	TcMar-Mariner	37
tn_5_1587	19.2479	161	Unknown	Unknown	130
bm_1899	19.251	1777	LINE	RTE	53
tn_4_1417	19.2546	355	Unknown	Unknown	527
tn_6_539	19.2842	293	Unknown	Unknown	702
DIRS-2_PBa	19.2939	1597	LTR	LTR	26
bm_159	19.31	7148	Unknown	Unknown	59
bm_1186	19.3165	775	DNA	Tc1_mariner	529
Kolobok-2_DR	19.3307	6700	DNA	Kolobok-T2	11
tn_4_292	19.3713	272	SINE	tRNA	1626
bm_440	19.3892	751	Unknown	Unknown	153
tn_5_588	19.3973	247	LINE	Jockey	458
Mariner-26_HM	19.4052	2923	DNA	TcMar-Fot1	10
bm_2239	19.4303	218	Unknown	Unknown	981
bm_577	19.4429	344	DNA	Tc1_mariner	42
tn_3_262	19.463	189	LINE	LINE	60
bm_622	19.4762	4196	LINE	R1	13
tn_4_130	19.4782	180	Unknown	Unknown	1009
tn_4_43	19.479	435	DNA	hAT	833
tn_4_8	19.4795	4498	LINE	Proto2	1162
bm_2241	19.5032	147	Unknown	Unknown	169
CoeSINE4	19.5464	201	SINE	SINE	32
tn_6_5	19.554	214	Unknown	Unknown	92
TED_int	19.6077	6409	LTR	Gypsy	61
tn_5_458	19.6415	325	RC	Helitron	2265
tn_5_2759	19.6569	212	Unknown	Unknown	97
bm_5	19.6621	477	Unknown	Unknown	119
tRNASerTCT_CB	19.6691	92	tRNA	tRNA	18
tn_5_196	19.6703	197	Unknown	Unknown	191
Gypsy68-I_AG	19.6767	5536	LTR	Gypsy	23
tn_5_86	19.6874	357	Unknown	Unknown	1936
bm_152	19.6892	962	Unknown	Unknown	70
bm_99	19.7286	777	LINE	RTE	13
tn_5_4270	19.8258	215	Unknown	Unknown	61
bm_1302	19.8503	184	Unknown	Unknown	47
CR1-79_HM	19.8539	4883	LINE	L2	14
bm_1420	19.8627	187	Unknown	Unknown	12
ISL2EU-3N1_CFl	19.8634	780	DNA	DNA	15
hAT-41_Lch	19.9105	4614	DNA	DNA	226
bm_253	19.9488	312	Unknown	Unknown	27
bm_514	19.9513	328	Unknown	Unknown	18
bm_1141	19.963	639	Unknown	Unknown	240
bm_497	19.9835	838	Unknown	Unknown	10
tn_5_2452	20.0174	383	Unknown	Unknown	1324
bm_1014	20.0247	2044	LINE	RTE	33
tn_5_2243	20.0675	104	Unknown	Unknown	169
bm_258	20.0811	1098	LINE	CR1	13
tn_4_301	20.0896	145	LINE	LINE	601
tn_3_64	20.1148	200	Unknown	Unknown	879
EnSpm-2_TD	20.1584	5096	DNA	CMC-EnSpm	10
tn_6_2562	20.1666	178	Unknown	Unknown	55
bm_1179	20.1709	992	Unknown	Unknown	134
bm_40	20.1716	604	LINE	RTE	184
Kolobok-N1_AEc	20.1791	8251	DNA	DNA	10
bm_198	20.2103	749	LINE	Jockey	19
tn_6_3321	20.212	147	Unknown	Unknown	60
tn_6_826	20.2528	3416	LINE	RTE-RTE	733
tn_6_73	20.285	141	Unknown	Unknown	236
Dada-tY_PMar	20.3912	4281	DNA	Dada	11
bm_666	20.4309	307	Unknown	Unknown	47
tn_5_731	20.4575	353	RC	Helitron	1087
tn_2_14	20.534	321	RC	Helitron	22628
tn_5_1752	20.5529	1107	LINE	CR1	55
tn_5_61	20.5736	198	Unknown	Unknown	96
tn_5_122	20.5937	182	Unknown	Unknown	215
tn_4_238	20.6457	425	Unknown	Unknown	4538
bm_875	20.648	371	Unknown	Unknown	172
tn_5_32	20.6482	607	RC	Helitron	2562
tn_4_6	20.6497	2850	LINE	L2	182
tn_3_528	20.6848	129	Unknown	Unknown	565
RTE-N2_Lch	20.724	286	LINE	LINE	11
tn_3_7	20.7256	110	Unknown	Unknown	1080
tn_5_334	20.7478	423	Unknown	Unknown	3039
tn_5_125	20.7617	217	Unknown	Unknown	1165
bm_2141	20.7732	274	Unknown	Unknown	10
tn_6_253	20.7909	285	Unknown	Unknown	2824
tn_6_1428	20.8083	391	LINE	R1	83
tn_6_93	20.8091	356	Unknown	Unknown	1367
HaSE2_DP	20.8301	299	SINE	tRNA	50
bm_1509	20.8338	1240	SINE	Unknown	97
Copia27-PTR_I	20.8406	4224	LTR	Copia	10
tn_4_76	20.8634	262	LINE	RTE-RTE	677
RTE-5_BM	20.8737	3040	LINE	RTE-BovB	56
tn_3_248	20.8976	273	SINE	MIR	3814
tn_5_1532	20.9135	138	Unknown	Unknown	708
tn_5_1972	20.9256	301	DNA	hAT	1371
tn_5_2239	20.9466	2317	LINE	CR1	134
Helitron-2_DR	20.9486	27412	RC	Helitron	19
tn_6_2081	20.9869	583	LINE	L2	95
tn_4_279	21.0524	150	Unknown	Unknown	729
tn_6_47	21.056	236	Unknown	Unknown	99
DNA-8-5_DR	21.0637	2140	DNA	hAT	13
MINIME_DN	21.1257	1218	Unknown	Unknown	21
tn_5_294	21.1302	317	SINE	5S-Deu	894
bm_634	21.1588	754	Unknown	Unknown	2434
bm_794	21.182	324	Unknown	Unknown	14
tn_6_1778	21.1932	265	Unknown	Unknown	1629
tn_6_664	21.195	294	Unknown	Unknown	2920
HaSE3	21.2365	349	SINE	5S-Deu	515
Polinton-1_DR	21.2406	18485	DNA	Maverick	29
bm_439	21.2936	471	Unknown	Unknown	12
bm_769	21.3147	770	DNA	Tc1_mariner	379
bm_17	21.3165	2088	LINE	RTE	106
TART_DV	21.4099	15099	LINE	Jockey	27
Novosib-6_CR	21.4561	3392	DNA	Novosib	30
Chapaev-8_HM	21.4627	9037	DNA	CMC-Chapaev	10
tn_5_1987	21.4756	266	LINE	LINE	527
bm_1203	21.4808	590	Unknown	Unknown	136
hAT-26_CPB	21.5496	3071	DNA	hAT-Blackjack	17
Mariner-4_AEc	21.553	1291	DNA	DNA	19
bm_570	21.6153	781	Unknown	Unknown	164
tn_5_129	21.7055	164	Unknown	Unknown	298
hAT-N144_DR	21.7453	17446	DNA	hAT?	29
tn_6_275	21.7864	137	Unknown	Unknown	257
bm_894	21.8121	430	Unknown	Unknown	42
bm_781	21.8218	516	Unknown	Unknown	11
bm_2216	21.8325	362	Unknown	Unknown	13
bm_353	21.8693	9649	LTR	Pao	21
Mariner-6_HSal	21.8971	1299	DNA	DNA	12
bm_925	21.9062	556	Unknown	Unknown	395
Helitron-1_DT	21.9359	893	RC	Helitron	11
bm_1202	21.9878	3258	LINE	RTE	51
HAT-6_Mad	22	3483	DNA	hAT-Tip100	14
bm_1353	22.0025	541	LINE	RTE	12
tn_5_1525	22.0342	427	Unknown	Unknown	206
Copia12-NVi_I	22.0473	8827	LTR	Copia	15
hAT-3_DF	22.0746	779	DNA	hAT-Ac	19
bm_627	22.1494	363	Unknown	Unknown	10
bm_1930	22.1687	320	Unknown	Unknown	240
ERV1-7_DR-I	22.1956	6703	LTR	ERV1	10
bm_982	22.2067	1492	LINE	R4	39
tn_6_614	22.2194	149	Unknown	Unknown	622
bm_37	22.255	506	Unknown	Unknown	266
Sola1-1_AC	22.2968	4097	DNA	Sola	34
tn_5_2607	22.3127	731	Unknown	Unknown	37
bm_603	22.3444	3452	SINE	Bm1	10
bm_2185	22.3631	248	Unknown	Unknown	11
tn_6_623	22.3716	165	Unknown	Unknown	438
tn_6_180	22.485	104	Unknown	Unknown	193
hAT-1_DAn	22.496	3052	DNA	hAT-Charlie	55
tn_5_718	22.5243	392	LINE	RTE-RTE	38
bm_1631	22.6446	3218	Unknown	Unknown	18
L2-1_BM	22.6531	3514	LINE	L2	15
Sola3-1_BF	22.7405	8912	DNA	Sola	13
bm_652	22.7918	1295	Unknown	Unknown	41
bm_759	22.806	1469	Unknown	Unknown	21
Copia-58_BG-I	22.8613	4976	LTR	Copia	11
bm_878	22.8705	445	LINE	RTE	36
tn_5_3273	22.8919	1695	Unknown	Unknown	88
PIGGYB_SM	23.0295	4698	DNA	PiggyBac	68
bm_1148	23.1705	4062	LINE	RTE	74
bm_1033	23.1725	923	Unknown	Unknown	37
bm_1607	23.1813	2714	DNA	Helitron	61
nhat-2b_Hmel	23.238	1630	DNA	hAT?	10
RTE-4_LCh	23.2389	3183	LINE	LINE	10
bm_458	23.2679	1045	DNA	Tc1_mariner	36
bm_1262	23.3149	366	LINE	RTE	11
Helitron-N2_DT	23.3395	938	RC	Helitron	14
Gypsy-31-LTR_DR	23.4188	954	LTR	Gypsy	17
Ginger1-1_AC	23.4336	4336	DNA	Ginger	15
bm_1701	23.4534	682	Unknown	Unknown	760
bm_1549	23.46	813	Unknown	Unknown	22
Tx1-3_PM	23.5057	5403	LINE	L1-Tx1	13
bm_2264	23.5321	442	SINE	Unknown	24
HelitronN-1_DPe	23.5327	1155	RC	Helitron	10
bm_268	23.5529	3171	LINE	RTE	705
bm_1240	23.5601	1188	Unknown	Unknown	17
tn_5_916	23.5951	3777	LINE	L2	162
tn_5_1459	23.62	2587	LINE	CR1	101
bm_1952	23.63	394	Unknown	Unknown	39
RT1	23.6386	8037	LINE	R1	10
bm_322	23.6635	1371	LINE	Unknown	39
tn_5_2209	23.7211	4106	LINE	L2	169
Helitron-7_DRh	23.7736	2908	RC	Helitron	10
bm_1104	23.8072	634	Unknown	Unknown	185
Academ-1_BM	23.8882	5870	DNA	Academ	40
DNAREP1_DYak	23.8929	793	RC	Helitron	13
bm_1434	23.9129	2019	LTR	Pao	15
Sola1-2_BM	23.9424	3302	DNA	Sola	11
tn_5_1110	23.9644	4005	LTR	Gypsy	126
bm_787	23.9977	905	Unknown	Unknown	10
bm_9	24.0066	452	Unknown	Unknown	146
tn_5_181	24.0477	239	Unknown	Unknown	1869
bm_1125	24.0523	288	Unknown	Unknown	24
bm_130	24.1025	2080	LINE	Unknown	36
tn_5_737	24.1304	147	Unknown	Unknown	424
bm_154	24.1494	9083	LINE	R1	10
bm_1130	24.1856	3639	LTR	Gypsy	50
bm_1645	24.3038	13595	LINE	R4	42
hAT-N2_LMi	24.3674	4133	DNA	hAT?	55
bm_450	24.3804	2573	LINE	Jockey	10
bm_968	24.4133	3252	LINE	Unknown	41
tn_2_78	24.444	131	Unknown	Unknown	7217
nMar-7_Hmel	24.4862	1628	DNA	DNA	55
bm_843	24.4899	972	Unknown	Unknown	25
bm_633	24.5151	1323	LINE	RTE	15
Polinton-2A_NV	24.5414	20836	DNA	Maverick	11
bm_314	24.5711	903	Unknown	Unknown	17
REP-4_PBa	24.5888	2757	Unknown	Unknown	21
bm_785	24.6029	1204	LINE	R1	20
bm_1988	24.6178	284	Unknown	Unknown	153
Copia-1_ST-LTR	24.6815	3121	LTR	Copia	12
bm_75	24.7274	692	Unknown	Unknown	11
NAVIMARN1	24.7299	733	DNA	TcMar	12
bm_1021	24.8118	1209	LINE	Jockey	43
bm_1835	24.8584	375	Unknown	Unknown	64
Gypsy82-LTR_Dr	24.8719	1345	LTR	Gypsy	12
tn_5_538	24.8917	1493	LINE	CR1	152
Helitron2_AG	24.9635	6365	RC	Helitron	22
DNA-2-32_DR	24.9973	8782	DNA	DNA	23
Helitron-2_DF	25.0143	2141	RC	Helitron	35
tn_4_28	25.0157	120	Unknown	Unknown	2022
bm_1758	25.0418	220	Unknown	Unknown	21
RTE-1_HMe	25.0461	3701	LINE	RTE-BovB	14
Polinton-1_DK	25.1037	7252	DNA	Maverick	10
Copia-1_HMM-I	25.1509	3685	LTR	Copia	31
bm_691	25.1531	2077	DNA	helitron	85
Proto2-1_BM	25.2051	1110	LINE	Proto2	27
bm_234	25.2488	358	SINE	Bm1	26
Sola1-4_AA	25.2604	3171	DNA	Sola	10
bm_116	25.2728	447	Unknown	Unknown	10
hAT-N16_LMi	25.3087	1892	DNA	hAT-Tip100	17
tn_6_2572	25.3391	1024	Unknown	Unknown	86
tn_5_2826	25.3425	2798	LINE	CR1	91
bm_153	25.3472	1108	LINE	RTE	10
hAT-N4_ALy	25.3698	1146	DNA	hAT-Charlie	36
RTAg4	25.4151	7072	LINE	R1	32
BmSE	25.5908	271	SINE	tRNA	19
bm_1400	25.6503	1016	Unknown	Unknown	19
bm_942	25.6572	1601	DNA	Tc1_mariner	11
DNA8-60_AP	25.7065	911	DNA	DNA	20
Polinton-1_HM	25.7114	20689	DNA	Maverick	10
bm_1831	25.7799	703	Unknown	Unknown	13
tn_5_1840	25.8028	4375	LINE	L2	277
bm_736	25.8384	2247	LTR	Gypsy	29
hAT-N2C_LMi	25.8492	1422	DNA	hAT?	92
bm_1909	25.875	3084	DNA	helitron	55
Copia-1_BM-I	25.8863	4037	LTR	Copia	56
bm_2030	26.0502	2199	LTR	Gypsy	11
bm_1812	26.0988	397	Unknown	Unknown	92
Jockey-3_DGri	26.1231	4713	LINE	Jockey	12
bm_1849	26.1321	2670	LINE	L2	12
hAT-N2B_LMi	26.3345	1564	DNA	hAT?	13
tn_6_31	26.3713	121	Unknown	Unknown	460
Mariner-98_HSal	26.374	1292	DNA	DNA	16
tn_5_404	26.4096	3900	LINE	L2	426
bm_391	26.4116	340	LINE	RTE	26
bm_1911	26.4564	249	Unknown	Unknown	64
Kolobok-3_Aplcal	26.5331	5081	DNA	Kolobok-Hydra	16
Gypsy-4_LH-I	26.5473	4438	LTR	LTR	17
tn_6_686	26.5649	218	Unknown	Unknown	2674
bm_959	26.6181	4703	LINE	Unknown	79
bm_61	26.642	511	Unknown	Unknown	50
bm_1365	26.6911	1663	LINE	CR1	17
bm_1505	26.6984	1370	Unknown	Unknown	69
RTE-11_LCh	26.7004	3192	LINE	LINE	17
bm_821	26.721	1232	LTR	Gypsy	23
bm_1264	26.748	4546	LINE	Unknown	37
TE-X-12_DR	26.7574	1351	Unknown	Unknown	17
Gypsy-6_BM-I	26.7903	5848	LTR	Gypsy	20
bm_869	26.7923	1502	Unknown	Unknown	31
bm_1007	26.8895	1099	Unknown	Unknown	19
RTE-6_BM	26.9168	1556	LINE	RTE-BovB	29
bm_716	26.9332	3542	LINE	Unknown	15
bm_1119	26.9371	3426	LINE	R1	223
bm_144	26.9868	986	LINE	L2	15
bm_1025	27.0285	4007	LTR	Gypsy	96
bm_1815	27.0317	2415	DNA	Harbinger	126
RTE-3_BM	27.0582	1495	LINE	RTE-BovB	14
bm_313	27.1268	953	LINE	Unknown	62
bm_541	27.2263	2072	LINE	R4	25
nMar-18_Hmel	27.2419	1565	DNA	TcMar-Tc1	39
bm_1695	27.2742	4122	DNA	piggybac	86
RTE-1_BM	27.3014	2197	LINE	RTE-BovB	20
bm_76	27.4048	3629	LINE	L2	15
bm_991	27.4859	211	Unknown	Unknown	26
Ginger1-5_HM	27.4909	7091	DNA	Ginger	17
bm_356	27.4968	2081	LINE	CR1	93
Copia-2_BM-I	27.5116	4040	LTR	Copia	29
AB055391	27.5302	2685	LINE	L2	43
bm_705	27.6074	1943	LINE	R1	11
bm_142	27.6397	1004	LINE	RTE	55
BEL-1_LH-I	27.6648	5973	LTR	LTR	13
bm_693	27.6782	1503	LINE	L2	13
bm_1052	27.7531	3093	LTR	Gypsy	10
bm_1051	27.7896	3262	LTR	Gypsy	16
Polinton-1_DGr	27.8088	15303	DNA	Maverick	12
bm_616	27.8399	369	Unknown	Unknown	13
bm_896	27.8848	4584	LTR	Unknown	63
bm_194	27.9648	2050	LINE	Unknown	120
bm_1832	27.9842	592	Unknown	Unknown	10
DNA-TTAA-5_NV	27.9875	806	DNA	DNA	13
piggyBac-2_SM	27.9892	2426	DNA	PiggyBac	88
hATx-4_SM	28.0141	2857	DNA	hAT-hATx	15
Helitron-1_SMo	28.1598	7663	RC	Helitron	12
SINE2B-1_CM	28.1707	367	SINE	tRNA-L2	10
bm_1405	28.2917	2772	LTR	Gypsy	10
bm_715	28.3308	2469	LTR	Pao	18
HARB-1_AP	28.3416	2390	DNA	PIF-Harbinger	53
bm_1663	28.3929	642	Unknown	Unknown	11
Harbinger-3_LMi	28.3975	2898	DNA	PIF-Harbinger	14
Sola1-4_AP	28.4261	3041	DNA	Sola	11
Gypsy-3_HMM-I	28.4469	4886	LTR	Gypsy	46
Mariner-21_CGi	28.4641	9744	DNA	TcMar-m44	15
bm_1431	28.4738	2437	DNA	Harbinger	44
bm_1984	28.4921	1455	LTR	Pao	31
bm_382	28.5371	5550	LINE	I	31
LYDIA_I	28.5534	6054	LTR	Gypsy	53
bm_1160	28.5884	1067	Unknown	Unknown	32
Dong	28.5914	4134	LINE	Dong-R4	74
R1-1_CFl	28.6808	4097	LINE	LINE	36
bm_1855	28.6909	831	LTR	Pao	36
Mariner-14_HM	28.701	2012	DNA	TcMar-Fot1	16
Helitron-2_DBp	28.7012	3876	RC	Helitron	21
P-1_DR	28.7214	9968	DNA	P	12
bm_1429	28.758	3459	LINE	Unknown	33
bm_90	28.765	964	LINE	CR1	23
Copia_I	28.8574	4593	LTR	Copia	31
bm_1672	28.9091	1528	LINE	Unknown	14
bm_931	28.916	1067	LINE	RTE	14
bm_912	29.0211	2753	LINE	RTE	13
bm_939	29.0449	3489	LINE	L2	37
bm_1750	29.0897	150	Unknown	Unknown	11
bm_543	29.213	1214	SINE	Unknown	350
Mariner-7_BM	29.2473	1734	DNA	TcMar-Tc1	18
bm_1523	29.3592	613	LINE	R4	37
Helitron-1_DAna	29.4225	1839	RC	Helitron	34
bm_1789	29.4645	1615	LINE	RTE	16
bm_783	29.5011	3085	LINE	Unknown	16
Sake_BM	29.5463	5140	LINE	L2	30
bm_1204	29.5478	2468	LTR	Helitron	13
RTE-2_BM	29.6159	3238	LINE	RTE-RTE	14
bm_1191	29.6214	898	LTR	Pao	13
R4-1_HMe	29.6262	4539	LINE	Dong-R4	16
Crack-21_AAe	29.6472	5478	LINE	L2	10
R1-3_SIn	29.6598	3592	LINE	LINE	14
Ag-Jock-1	29.6747	4725	LINE	Jockey	29
bm_65	29.7601	4754	LINE	Unknown	27
PiggyBac-3_HM	29.7623	2883	DNA	PiggyBac	23
R4-1_TCa	29.766	1721	LINE	Dong-R4	11
Sola1-1_AP	29.7886	4723	DNA	Sola	14
MuDR3_SM	29.813	2543	DNA	MULE-MuDR	11
bm_1796	29.8137	8920	LTR	Gypsy	56
bm_1126	29.8166	4127	LINE	Unknown	121
BEL2-I_Dpse	29.8268	7585	LTR	Pao	21
bm_1426	29.8739	903	DNA	Tc1_mariner	12
bm_2059	29.948	412	LINE	L2	22
Mariner-1_LMi	29.9583	2144	DNA	TcMar-Tc1	14
bm_1540	30.0005	784	Unknown	Unknown	11
Sake2_BM	30.0052	3192	LINE	L2	74
bm_903	30.0098	4725	LINE	L2	79
bm_835	30.0317	2168	LTR	Gypsy	14
Polinton-1_DEu	30.0329	10967	DNA	Maverick	31
RTE-1_DAn	30.0345	3361	LINE	RTE-BovB	20
Helitron-2_PM	30.0413	5315	RC	Helitron	10
bm_1595	30.0836	3039	LTR	Gypsy	10
bm_712	30.1513	4452	LTR	Copia	53
bm_383	30.1869	3326	LINE	L2	69
bm_1280	30.2014	6741	LTR	Pao	33
Helitron-5_DRh	30.2038	4612	RC	Helitron	16
bm_1155	30.2512	2172	Unknown	Unknown	72
Sola1-9_AP	30.2551	3907	DNA	Sola	10
hATx-1_HM	30.2555	3451	DNA	hAT-hATx	15
bm_1040	30.2683	1068	LTR	Unknown	22
bm_1640	30.2768	2110	LTR	Pao	22
bm_1785	30.2873	654	Unknown	Unknown	26
Daphne-73_HMa	30.2942	4599	LINE	L2	16
bm_502	30.3138	2710	Unknown	Unknown	20
Gypsy-13_SI-I	30.3145	4217	LTR	Gypsy	15
bm_990	30.3244	3718	LTR	Gypsy	32
bm_877	30.3316	6389	LTR	Gypsy	151
BEL-21_DAn-I	30.419	8522	LTR	Pao	18
bm_1011	30.4257	4904	LINE	Unknown	77
bm_1299	30.4669	3863	LINE	LTR	17
bm_504	30.4874	2108	LINE	R1	14
bm_1421	30.5153	3761	LTR	Gypsy	37
BEL-7_DRh-I	30.6264	7686	LTR	LTR	12
bm_1216	30.6599	2623	LTR	Gypsy	35
bm_1172	30.6654	2056	LTR	Gypsy	18
DIRS-2_HSal	30.6954	4958	LTR	LTR	21
Copia-93_ST-I	30.6975	4222	LTR	Copia	10
bm_1871	30.6987	804	LTR	Pao	31
Gypsy-8_HMM-I	30.7049	4013	LTR	Gypsy	19
bm_521	30.7751	3568	LINE	L2	15
bm_768	30.7765	1186	LINE	RTE	10
DIRS-1_PBa	30.7957	4989	LTR	LTR	23
Harbinger-4_XT	30.801	5442	DNA	PIF-Harbinger	27
bm_1866	30.8573	6465	LTR	Pao	16
bm_526	30.8681	4472	LTR	Pao	49
bm_1170	30.9031	4081	LTR	Pao	41
bm_205	30.904	607	LINE	RTE	11
bm_1371	30.9206	3455	LINE	Unknown	41
Gypsy-2_BM-I	30.9212	4805	LTR	Gypsy	44
bm_1066	30.9924	1841	LTR	Unknown	25
bm_686	30.9963	2372	LTR	Copia	105
Sola2-1_BM	30.9973	3705	DNA	Sola	10
bm_1171	31.0059	1375	DNA	Tc1_mariner	13
Sola1-3_AP	31.1018	3762	DNA	Sola	25
bm_1174	31.1176	1960	LINE	Unknown	12
Transib-15_HM	31.1188	3654	DNA	CMC-Transib	20
bm_1581	31.1225	3590	LTR	Gypsy	53
LDT1	31.1257	5677	LINE	Jockey	38
bm_1464	31.1637	1898	LINE	CR1	24
bm_2058	31.1976	431	Unknown	Unknown	15
Gypsy-10_HMM-I	31.215	4050	LTR	Gypsy	16
Mariner-12_BM	31.2195	1651	DNA	TcMar-Tc1	21
bm_779	31.2341	2418	LINE	L2	61
bm_932	31.2583	2448	LTR	Gypsy	10
BEL-11_DEl-I	31.2659	6271	LTR	Pao	11
CR1-1_BM	31.2958	3410	LINE	CR1	33
bm_1660	31.3102	1549	LINE	Unknown	22
bm_978	31.3133	5061	LTR	Pao	99
bm_1250	31.3225	1203	LINE	Unknown	26
Polinton-5_PBa	31.3235	19981	DNA	DNA	10
Crack-15_AAe	31.3615	5789	LINE	L2	10
DIRS_Nvi	31.3685	5921	LTR	DIRS	50
bm_1267	31.3919	1321	Unknown	Unknown	64
Harbinger-1_LMi	31.4215	2663	DNA	PIF-Harbinger	21
Harbinger-3_XT	31.433	4687	DNA	PIF-Harbinger	10
bm_1770	31.4634	6669	LTR	Pao	29
bm_1144	31.5106	1261	LTR	Pao	20
Transib1_NVi	31.5116	3506	DNA	CMC-Transib	10
DIRS-1_NVi	31.5507	4849	LTR	DIRS	43
BEL-4_NVi-I	31.5677	5704	LTR	Pao	10
Gypsy-7_BM-I	31.5919	4963	LTR	Gypsy	76
bm_819	31.5999	3322	LINE	R4	43
ROO_I	31.6526	8256	LTR	Pao	11
bm_1054	31.6758	2576	LTR	Unknown	45
DIRS-1_HSal	31.7002	4978	LTR	LTR	22
bm_1953	31.7058	1043	LTR	Unknown	12
Gypsy-2_HMM-I	31.7116	5892	LTR	Gypsy	66
Helitron-1_AP	31.723	2907	RC	Helitron	24
Gypsy-36_DAn-I	31.737	4561	LTR	Gypsy	25
Sola1-1_BM	31.7542	3740	DNA	Sola	19
bm_880	31.7778	1022	LTR	Pao	34
bm_1175	31.7915	1444	DNA	Tc1_mariner	14
ISL2EU-7_CFl	31.8016	2905	DNA	DNA	61
bm_1653	31.8209	4115	LTR	Pao	71
bm_561	31.8586	1404	LTR	Pao	21
Gypsy-30_DWil-I	31.8607	4497	LTR	Gypsy	10
bm_544	31.8702	1529	LINE	CR1	19
Copia-78_Mad-I	31.8743	4275	LTR	Copia	19
Gypsy-601_AA-I	31.8771	5291	LTR	Gypsy	13
bm_2189	31.8788	1069	LINE	RTE	14
Copia-6_DWil-I	31.9082	4258	LTR	Copia	14
Gypsy-6_DEu-I	31.9142	6954	LTR	LTR	10
bm_1226	31.9427	867	LTR	Unknown	19
Gypsy-204_AA-I	31.9553	3615	LTR	Gypsy	14
bm_1348	32.005	3504	LTR	Gypsy	16
BEL-8_DMo-I	32.0059	7246	LTR	Pao	16
bm_1842	32.0452	3051	LTR	Pao	49
bm_8	32.0901	4897	LINE	R1	14
Copia-30_PAb-I	32.0912	4195	LTR	LTR	13
RTE-4_BM	32.0916	2754	LINE	RTE-RTE	29
bm_659	32.1276	3274	LINE	R1	29
P-28_HM	32.1306	3885	DNA	P	16
hAT-2_AP	32.1801	3473	DNA	hAT-Ac	16
AGM1-I	32.2173	5330	LTR	Pao	10
Transib-2_HM	32.2605	3140	DNA	CMC-Transib	24
BEL-2_HMM-I	32.2639	5827	LTR	Pao	219
Polinton-4_NVi	32.2695	12608	DNA	Maverick	15
bm_1087	32.2804	5605	LINE	I	16
Gypsy-44_AA-I	32.3156	5799	LTR	Gypsy	32
bm_679	32.3364	4145	DNA	P	92
Transib-1_SIn	32.3413	3682	DNA	DNA	56
bm_428	32.3542	5184	LINE	Unknown	55
bm_789	32.3611	4434	LTR	Gypsy	35
bm_1224	32.3851	1249	LTR	Gypsy	16
piggyBac-1_SM	32.4208	2434	DNA	PiggyBac	29
bm_1049	32.435	1229	LTR	Pao	18
bm_1427	32.4432	2037	LINE	RTE	27
L08889	32.4525	4126	LINE	R4	29
Polinton-4_PBa	32.4666	15965	DNA	DNA	46
bm_1156	32.4724	2463	LTR	Pao	17
bm_1868	32.4769	5535	LINE	I	27
R1	32.4779	5093	LINE	R1	57
Helitron-1_AC	32.5007	8771	RC	Helitron	12
Copia-2_TCa-I	32.5026	4112	LTR	Copia	49
bm_1150	32.5367	5640	LTR	Pao	46
Mariner-4_BM	32.5461	1291	DNA	TcMar-Mariner	10
Copia-13_LH-I	32.5525	4162	LTR	LTR	11
bm_1548	32.5848	1531	LTR	Gypsy	26
Helitron-1_AAe	32.6112	8288	RC	Helitron	19
bm_1312	32.6164	1372	LINE	RTE	12
BEL-3_LH-I	32.6185	6055	LTR	LTR	11
Gypsy-593_AA-I	32.6344	6069	LTR	Gypsy	16
bm_438	32.6401	4743	LTR	Unknown	38
bm_1438	32.6435	1334	LINE	L2	12
bm_1529	32.7058	2628	LTR	Pao	42
bm_1791	32.715	1088	DNA	Tc1_mariner	13
bm_1298	32.7317	2850	LINE	L2	25
bm_1813	32.7413	785	LTR	Pao	20
bm_1207	32.7479	1631	LTR	Pao	11
DIRS-1_BM	32.7557	4870	LTR	DIRS	49
bm_1897	32.7572	1035	LTR	Pao	14
bm_289	32.7646	2408	LINE	L2	144
TRAS3_BM	32.7675	8005	LINE	R1	34
Copia4-I_AG	32.8187	4122	LTR	Copia	10
Kabuki	32.8194	5342	LTR	Unknown	56
Transib-1_LHu	32.8831	4304	DNA	DNA	24
Gypsy-8_DBi-I	32.9058	4420	LTR	Gypsy	16
BEL-206_AA-I	32.9243	5746	LTR	Pao	22
bm_2014	32.9753	7164	LTR	Pao	62
bm_1335	33.0035	2141	SINE	Bm1	70
bm_949	33.0068	3721	LINE	L2	60
BEL-1_HMM-I	33.0115	6569	LTR	Pao	11
BEL-1_PBa-I	33.0208	5465	LTR	LTR	10
bm_1189	33.0339	2865	LTR	Pao	61
bm_1857	33.0719	1710	LINE	CR1	74
Mariner-8_HSal	33.1079	1514	DNA	DNA	21
R1_DYa	33.1664	5513	LINE	R1	12
bm_1231	33.1888	1488	LINE	L2	76
bm_1113	33.2173	4703	LINE	CR1	32
bm_873	33.238	4250	LINE	CR1	16
bm_1473	33.267	1103	LTR	Unknown	28
bm_402	33.281	2977	LINE	CR1	55
bm_1297	33.2927	1169	LINE	RTE	13
bm_724	33.3004	5312	LTR	Gypsy	57
Gypsy-13_DEl-I	33.3261	3899	LTR	Gypsy	17
Mariner-8_BM	33.3742	1654	DNA	TcMar-Tc1	33
bm_1829	33.376	3319	LINE	CR1	12
Rikishi	33.3894	4560	LTR	Unknown	15
bm_1517	33.4471	1278	LINE	Unknown	18
bm_823	33.55	791	LTR	Pao	13
bm_1103	33.567	2823	LTR	Gypsy	20
Gypsy-6_LH-I	33.626	4629	LTR	LTR	13
Gypsy-208_DR-I	33.6619	3953	LTR	Gypsy	10
bm_1127	33.6738	1577	LINE	Unknown	25
Gypsy-1_Cfl-I	33.6997	4203	LTR	Gypsy	15
TRAS9_SC	33.7771	1908	LINE	R1	10
bm_1388	33.7777	893	LINE	Unknown	12
Arthur1	33.8163	3947	DNA	hAT-Tip100	13
bm_415	33.8414	3789	LINE	CR1	83
bm_814	33.8919	2981	LINE	RTE	47
bm_219	33.9704	7097	LTR	Gypsy	10
DIRS-1_SIn	34.0227	4785	LINE	LINE	14
BEL-11_LH-I	34.0246	5802	LTR	LTR	45
Gypsy-1_LH-I	34.1395	4690	LTR	LTR	13
bm_798	34.2138	4660	LINE	Unknown	14
bm_1943	34.2377	922	LINE	Unknown	30
Gypsy14-I_Dpse	34.2523	3604	LTR	Gypsy	13
bm_1599	34.3956	946	LINE	L2	24
Penelope-1_AEc	34.4169	2710	LINE	LINE	82
Gypsy-10_TCa-I	34.6829	5085	LTR	Gypsy	19
bm_1864	34.7738	3570	LINE	L2	57
bm_548	34.9059	5036	LINE	CR1	14
bm_1380	35.0635	1445	LINE	Unknown	20
bm_1350	35.3569	953	LTR	Unknown	30
DongAa	35.5583	4004	LINE	Dong-R4	15
bm_998	35.6671	1286	LTR	Gypsy	20
Mariner-1_SIn	37.105	2950	DNA	DNA	11

## Sheet: S1J Curation of W-linked genes
W-linked coding gene *	Annotation type	Annotation	piRNA ppm	DNA-seq coverage in			Summary of W-linked coding genes
				Female thorax	Male thorax		Annotation type	Count
TNI010444	No homologs found	NA	168.861	174.318	1.37624		No homologs found	33
TNI012768	No homologs found	NA	24.4743	29	3.15909		Transposon homology	8
TNI014504	Transposon homology	Retroelement polyprotein	49.5296	314.965	5.54574		Uncharacterized, or hypothetical proteins	21
TNI014505	No homologs found	NA	8.57388	316.644	2.86594		Potential protein-coding genes	12
TNI015337	No homologs found	NA	2.62545	135.361	1.40625		Total	74
TNI015338	No homologs found	NA	15.5427	60.8135	1.87552
TNI016050	Uncharacterized or hypothetical	Uncharacterized protein OBRU01_02090	23.148	98.2037	1
TNI016051	No homologs found	NA	45.8753	103.258	1.38818
TNI016056	Uncharacterized or hypothetical	PREDICTED: uncharacterized protein LOC105385876 isoform X1	24.2883	93.8914	1
TNI016061	Uncharacterized or hypothetical	uncharacterized protein LOC110997796 isoform X3 [Pieris rapae]	25.9104	72.0788	1.53628
TNI016058	No homologs found	NA	58.0873	84.5632	2.2783
TNI016057	Uncharacterized or hypothetical	PREDICTED: LOW QUALITY PROTEIN: putative nuclease HARBl1	20.9068	132.834	1.31931
TNI016063	Uncharacterized or hypothetical	Uncharacterized protein OBRU01_21088	92.9987	145.01	3.18665
TNI016075	Transposon homology	piggyBac transposable element-derived 3-like	23.248	27	0
TNI016078	Uncharacterized or hypothetical	Uncharacterized protein OBRU01_25830	37.9309	62.3502	1.60518
TNI016077	Uncharacterized or hypothetical	PREDICTED: uncharacterized protein LOC106138234 [Amyelois transitella]	196.592	36.7307	1.18151
TNI016072	No homologs found	NA	75.1212	171.921	1.31815
TNI016079	Transposon homology	piggyBac transposable element-derived 3-like	162.985	200.225	1.85651
TNI016080	No homologs found	NA	41.6431	50.8095	3.50145
TNI016091	No homologs found	NA	160.794	22.3194	0
TNI016083	No homologs found	NA	13.1865	67.8544	1.29911
TNI016916	Uncharacterized or hypothetical	uncharacterized protein LOC111353696 [Spodoptera litura]	22.5681	71.8875	1
TNI016507	Uncharacterized or hypothetical	uncharacterized protein LOC111353696 [Spodoptera litura]	0.922884	63.5526	1.86364
TNI017107	Uncharacterized or hypothetical	Uncharacterized protein OBRU01_25830	10.5973	115.352	4.40235
TNI017737	Potential protein-coding genes	transcription initiation factor TFIID subunit 4 isoform X1 [Drosophila rhopaloa]	67.9984	155.209	1.25397
TNI017212	No homologs found	NA	23.5797	94.6969	1.2951
TNI017610	Uncharacterized or hypothetical	Hypothetical protein KGM_10563	23.9776	56.9003	1.075
TNI017611	Uncharacterized or hypothetical	Hypothetical protein KGM_10563	39.4508	388.625	3.77292
TNI017148	No homologs found	NA	8.17065	51.4916	0
TNI016596	Potential protein-coding genes	translation initiation factor IF-2-like	13.9003	95.9073	1
TNI016598	No homologs found	NA	1.85638	103.16	2.43682
TNI016597	Uncharacterized or hypothetical	PREDICTED: LOW QUALITY PROTEIN: putative nuclease HARBl1	0.254589	118.46	2.4375
TNI017473	Uncharacterized or hypothetical	PREDICTED: Uncharacterized protein LOC106142574	115.094	53.0506	1.07727
TNI017368	No homologs found	NA	380.747	57.1641	1.11131
TNI016498	Potential protein-coding genes	PREDICTED: unc-79 homolog	66.1447	82.0168	0
TNI016499	Potential protein-coding genes	PREDICTED: unc-79 homolog	238.708	291.594	1.75212
TNI017003	No homologs found	NA	9.87665	123.472	2.78017
TNI017178	Potential protein-coding genes	PREDICTED: unc-79 homolog	9.38978	177.929	1.75812
TNI016736	Uncharacterized or hypothetical	PREDICTED: Uncharacterized protein LOC105385439	40.1773	151.786	1
TNI017457	No homologs found	NA	12.9394	124.547	2.82363
TNI017456	Uncharacterized or hypothetical	PREDICTED: LOW QUALITY PROTEIN	62.5837	110.639	1.6701
TNI016990	Transposon homology	piggyBac transposable element-derived 1-like	7.92627	280.021	3.68967
TNI016778	Potential protein-coding genes	unc-79 homolog	0.909624	86.8812	1.105
TNI017303	No homologs found	NA	1.623	78.4957	2.18011
TNI017202	Transposon homology	piggyBac transposable element-derived 2 isoform X1 [Pan troglodytes]	110.293	116.036	7.82592
TNI017497	No homologs found	NA	19.0737	27.4966	1
TNI016617	No homologs found	NA	4.54212	35.387	1.40018
TNI017779	Transposon homology	piggyBac transposable element-derived 3-like	0.111383	43.6977	0
TNI017738	No homologs found	NA	10.8335	85.4901	3.71337
TNI017130	No homologs found	NA	31.233	56.2927	1
TNI017441	No homologs found	NA	1.0066	67.9319	1.92629
TNI016466	Potential protein-coding genes	PREDICTED: putative nuclease HARBl1	9.68449	39.5061	0
TNI017030	Uncharacterized or hypothetical	Hypothetical protein RR48_01322	45.0555	77.5878	1
TNI017425	Potential protein-coding genes	PREDICTED: Golgi-specific brefeldin A-resistance guanine nucleotide exchange factor 1	194.91	29.5168	1
TNI016731	Potential protein-coding genes	PREDICTED: Golgi-specific brefeldin A-resistance guanine nucleotide exchange factor 1	23.5844	50.0319	1.53451
TNI017056	Potential protein-coding genes	Putative nuclease HARBl1	5.40568	53.478	2.15509
TNI017211	No homologs found	NA	23.7053	32.4108	2.19406
TNI017714	Transposon homology	Gag polyprotein	28.4146	37.1909	0
TNI017055	Transposon homology	piggyBac transposable element-derived 3-like	9.02199	173.853	7.70765
TNI016845	Uncharacterized or hypothetical	Uncharacterized protein OBRU01_17656, partial	18.2973	73.1441	1.95984
TNI016844	No homologs found	NA	38.2131	52.4784	6.87399
TNI017792	No homologs found	NA	1.49121	65.0082	1.55437
TNI001015	Potential protein-coding genes	kinase C iota type	0	34.0344	1.97473
TNI001017	No homologs found	NA	0	45.7212	1.06517
TNI003256	No homologs found	NA	23.5971	93.75	2.81707
TNI004867	Uncharacterized or hypothetical	Uncharacterized protein LOC111353696 [Spodoptera litura]	23.5701	21.5538	1
TNI005338	No homologs found	NA	0.074255	281.869	1.36279
TNI005339	No homologs found	NA	0	139.757	0
TNI005000	No homologs found	NA	3.5006	52.0194	1
TNI004992	Potential protein-coding genes	Vitellogenin receptor	1.40024	75.4535	1.29981
TNI005956	No homologs found	NA	13.1591	108.378	1
TNI005957	Uncharacterized or hypothetical	PREDICTED: Uncharacterized protein	9.63724	263.189	1.55811
TNI005960	No homologs found	NA	22.585	54.0358	0
TNI005959	Uncharacterized or hypothetical	PREDICTED: Uncharacterized protein	0.994487	33.3043	0
* Predicted genes may include false positives, such as transposons
Note: "NA" indicates no homologs were found
W-linked miRNAs
Scaffold	Start	End	Name	Conservation status
group27	56960	57053	mir-novel97	T. ni-specific
group27	264372	264429	mir-novel108	T. ni-specific
group27	443950	444041	mir-novel136b	T. ni-specific
group27	511502	511593	mir-novel136a	T. ni-specific
group27	891424	891511	mir-novel82	T. ni-specific
group27	1114871	1114955	mir-novel134	T. ni-specific
group27	1227371	1227460	mir-novel100	T. ni-specific
group27	2352476	2352534	mir-novel101	T. ni-specific
tig00001256_group27	27445	27503	mir-novel87	T. ni-specific
