# Supplementary material for: The genome of the Hi5 germ cell line from Trichoplusia ni, an agricultural pest and novel model for small RNA biology
Source: eLife journal article supplement (doi:10.7554/elife.31628), 2018-01-29
Supplement: supp [file elife-31628-supp-v1.zip › elife_poa_e31628_Supplementary_File_2.xlsx]

## Sheet: S2A
Genes in miRNA/siRNA pathways	Gene ID in T. ni	T. ni gene name	Scaffold	tBLASTn e-value
microprocessor complex subunit DGCR8 (pasha)	TNI013094	DGCR8	group17	2.89e-28
Ribonuclease 3 (drosha, RNC)	TNI006564	RNC	group6	3.52e-34
exportin-5 (Ranbp21, exp5)	TNI002090	XPO5	group1	2.72e-23
GTP-binding nuclear protein Ran (ran)	TNI002740	RAN	group2	9.09e-106
endoribonuclease dcr-1	TNI002422	dcr-1	group2	6.8e-19
endoribonuclease dcr-2	TNI008774	dcr-2	group9	2.72e-18
RISC-loading complex subunit / Interferon-inducible double stranded RNA-dependent protein kinase activator A-A (loqs, PRKRA)	TNI009568	PRKRA	group10	7.66e-22
gawky (gw)	TNI003091	gawky	group2	2.36e-29
CCR4-NOT transcription complex subunit 1 (not1, CNOT1)	TNI013924	CNOT1	group20	0
CCR4-NOT transcription complex subunit 3 (not3, CNOT3)	TNI000261	CNOT3	grouop0	3.06e-35
CCR4-NOT transcription complex subunit 6-like (twin, CCR4, CNO6L)	TNI007086 *	CNO6L	group7	1.8e-24
CCR4-NOT transcription complex subunit 11 (not11, CNOT11)	TNI001169	CNOT11	group1	2.83e-23
hen1	TNI005148	hen1	group4	1e-16
ago2	TNI007888	ago2	group8	5e-37
ago1	TNI012430	ago1	group15	0
* TNI007086 and TNI007087 were merged. The 3' UTR was curated to match RNA-seq signals

## Sheet: S2B
	piRNA pathway genes
	T. ni gene name	T. ni gene ID	T. ni scaffold	D. melanogaster gene	Mouse gene	B. mori gene
	TnAgo3	TNI000234	group0	ago3	-	bmAgo3
	TnPiwi	TNI008009	group8	aub	Mili	siwi
	armi	TNI007690	gropu7	armi	Mov10l1	armi
	tdrd12	TNI013819	NA	boYb	Tdrd12	tdrd12
	capsuleen	TNI003589	group3	capsuleen	Prmt5	capsuleen
	gtsf1	-*	group2	dmGtsf-1 (arx)	Gtsf1	gtsf1
	eggless	TNI012914	group16	eggless	Setdb1	eggless
	gasz (asz1)	TNI001897	group1	gasz (asz1)	Gasz	gasz
	hen1	TNI005148	group4	hen1	Hen1	hen1
	hsp83	TNI006421	group6	hsp83	Hsp83	hsp83
	krimper	TNI003105	group2	krimper	-	krimper
	mael	TNI014445	group19	maelstrom	Maelstrom	maelstrom
	papi	TNI016458	tig00003674	papi	Tdrd2 (Tdrdh)	papi
	qin	TNI011883	group14	qin	Rnf17	Qin
	shutdown	TNI011578	group14	shutdown	Fkbp6	shutdown-1
	shutdown-like	TNI002558	group2	-	-	shutdown-2
	spn-E	TNI009030	group10	spn-E	Tdrd9	spn-E
	tejas	TNI015432	group24	tejas	Tdrd5	tejas
	tudor	TNI008782	group9	tudor	Tdrd6	tudor
	uap56	TNI000513	group0	uap56	Uap56	usp56
	valois	TNI014546	group21	valois	Mep50	valois
	vasa	TNI000568	group0	vasa	Mvh	vasa
	vreteno	TNI007276	group7	vreteno	Tdrd1	vreteno
	zuc	-**	group4	zucchini	MitoPLD	zucchini
	-	-	-	piwi	-	-
	-	-	-	cutoff	-	-
	-	-	-	deadlock	-	-
	-	-	-	oskar	-	-
	-	-	-	rhino	-	-
	-	-	-	soyb	-	-
	-	-	-	squash	-	-
	-	-	-	yb	-	-
	-	-	-	panx	-	-
	-	-	-	-	Miwi	-
	-	-	-	-	A-Myb	-
	* Genome coordinate: group2:19662468-19666842
	** Genome coordinate: group4:12497170-12499557
