# Supplementary material for: The genome of the Hi5 germ cell line from Trichoplusia ni, an agricultural pest and novel model for small RNA biology
Source: eLife journal article supplement (doi:10.7554/elife.31628), 2018-01-29
Supplement: supp [file elife-31628-supp-v1.zip › elife_poa_e31628_Supplementary_File_3.xlsx]

## Sheet: A. miRNAs
ID	Povisional name	Povisional family	Best blastn hit*	blastn e-value	Example miRBase miRNA with the same seed	miRDeep2 score	Consensus mature sequence	Consensus star sequence	Consensus precursor sequence	Rfam hit	Read count
											Total	Mature	Loop	Star
group3_7216	mir-1a	mir-1	mse-mir-1a	1.27e-25	dme-miR-1-3p	3800000	uggaauguaaagaaguauggag	ccgugcuuccuuacuucccaua	ccgugcuuccuuacuucccauagugcuuauaaucguauggaauguaaagaaguauggag	mir-1	7512299	7511505	0	794
group10_15092	mir-277	mir-277	pxy-mir-277	3.34e-33	dme-miR-277-3p	1900000	uaaaugcacuaucugguacgaca	cgugccaggagugcguuugca	cgugccaggagugcguuugcaaagcacgcuacaguuuugcguuaaggcaaaguugacacuguaaaugcacuaucugguacgaca	mir-277	3730820	3729989	294	537
group6_12110	mir-14	mir-14	api-mir-14	1.02e-07	dme-miR-14-3p	1400000	ucagucuuuuucucucuccuau	cggggggaggaaucgacuugacu	cggggggaggaaucgacuugacuguaauauauacuagucagucuuuuucucucuccuau	mir-14	2856974	2805469	0	51505
group2_6254	mir-2766	mir-2766	bmo-mir-2766	6e-06	dme-miR-14-3p	1300000	ucagucuugucgaauggugggu	ccauccuucgucucgacuga	ccauccuucgucucgacugacgcugauauagaccuucagucuugucgaauggugggu	mir-672	2570024	2510624	1	59399
group14_24793	bantam	bantam	bmo-bantam	1.95e-21	dme-bantam-3p	1200000	ugagaucauugugaaagcugauu	ugguuuucauaaugauuugacaga	ugguuuucauaaugauuugacagauuguucuauauucugagaucauugugaaagcugauu	bantam	2497904	2490618	0	7286
group9_14386	mir-276	mir-276	hme-mir-276	4.63e-22	dme-miR-276a-3p	1200000	uaggaacuucauaccgugcucu	agcgagguauagaguuccuacg	agcgagguauagaguuccuacguaauauaccacuguaggaacuucauaccgugcucu	mir-276	2426380	2415065	0	11315
group0_514	mir-10-1	mir-10	bmo-mir-10	2.02e-27	dme-miR-10-5p	640000	acccuguagauccgaauuuguu	caaauucgguucuagagagguuu	acccuguagauccgaauuuguuugaagugaggcgacaaauucgguucuagagagguuu	mir-10	1258634	836383	0	422251
group7_12843	mir-10-2	mir-10	bmo-mir-10	2.02e-27	dme-miR-10-5p	640000	acccuguagauccgaauuuguu	caaauucgguucuagagagguuu	acccuguagauccgaauuuguuugaagugaggcgacaaauucgguucuagagagguuu	mir-10	1258634	836383	0	422251
group2_4472	mir-8	mir-8	hme-mir-8	4.51e-13	dme-miR-8-3p	610000	uaauacugucagguaaagauguc	caucuuaccgggcagcauuaga	caucuuaccgggcagcauuagagucaaauagcuauuucuaauacugucagguaaagauguc	mir-8	1215794	1127102	0	88692
group10_14595	mir-279a	mir-279	bmo-mir-279b	6.65e-09	dme-miR-279-3p	440000	ugacuagaucuacacucauuga	aauggguauauuucuaguaacaca	aauggguauauuucuaguaacacagugcauuauuucugugacuagaucuacacucauuga	mir-279	880852	876820	0	4032
group3_6415	mir-279b	mir-279	mse-mir-279a	7.39e-21	dme-miR-279-3p	330000	ugacuagauccacacucaucca	gaugaguggagguuuagugcaug	gaugaguggagguuuagugcauguuuuuguacaucaugacuagauccacacucaucca	mir-279	657323	654735	0	2588
group19_29152	mir-novel1	mir-novel1				300000	cuaacuucaauaauacguccg	gacgucuuguuggagauaaca	gacgucuuguuggagauaacaguugccguauguuuugcuugcuaacuucaauaauacguccg	#N/A	605338	605001	56	281
group10_15089	mir-34	mir-34	bmo-mir-34	1.81e-15	dme-miR-34-5p	280000	uggcagugugguuagcugguugu	agccacuaacgacacugcuucu	uggcagugugguuagcugguuguuuauuauaugacaacagccacuaacgacacugcuucu	mir-34	566294	558955	0	7339
group18_28510	mir-2763-1	mir-2763	mse-mir-2763	7.26e-12	bmo-miR-2771-3p	250000	auauuaugcuccuuacuuuggau	ccaaaguagagaacguaaucuaucg	ccaaaguagagaacguaaucuaucgugauauaugucuaaagauauuaugcuccuuacuuuggau	mir-142	496089	492955	1	3133
tig00004313_49790	mir-2763-2	mir-2763	mse-mir-2763	7.26e-12	bmo-miR-2771-3p	250000	auauuaugcuccuuacuuuggau	ccaaaguagagaacguaaucuaucg	ccaaaguagagaacguaaucuaucgugauauaugucuaaagauauuaugcuccuuacuuuggau	mir-142	496089	492955	1	3133
group3_6421	mir-11	mir-11	bmo-mir-11	1.02e-07	dme-miR-2a-3p	240000	caucacagucagaguucuagcu	cuaguacucuggcugcgaauugu	cuaguacucuggcugcgaauugugugucguguagucacaucacagucagaguucuagcu	mir-2	472083	458283	0	13800
group7_12847	mir-9b	mir-9	mse-mir-9b	7.85e-24	dme-miR-9a-5p	200000	ucuuugguuaucuagcuguauga	auaaagcuagguuaccggaguua	ucuuugguuaucuagcuguaugaguauuuagacaucauaaagcuagguuaccggaguua	mir-9	407178	402371	0	4807
tig00003240_group8_38422	mir-9a	mir-9	hme-mir-9a	1.84e-18	dme-miR-9a-5p	160000	ucuuugguauccuagcuguagg	uaaaguuaugguaccgaaguua	ucuuugguauccuagcuguaggcguguucgcagacccuaaaguuaugguaccgaaguua	mir-9	318613	236823	0	81790
group21_30866	mir-2755	mir-2755	mse-mir-2755	1.95e-21	dme-miR-993-5p	150000	cacccugucagaccauacuuguu	caagguggccuagcagcguguu	caagguggccuagcagcguguuuucucauaagguuugcacccugucagaccauacuuguu	mir-463	309438	309150	0	288
group10_14597	mir-279c	mir-279	bmo-mir-279c	1.23e-19	dme-miR-279-3p	150000	ugacuagauccauacucgucugc	gggcgaguuugcuucugguucaug	gggcgaguuugcuucugguucauguucuuuauaaaucaugacuagauccauacucgucugc	mir-279	298403	297578	0	825
group3_7073	mir-263	mir-263	hme-mir-263a	1.17e-13	dme-miR-263a-5p	140000	aauggcacuggaagaauucacggg	cguggucucuuaguggcauca	aauggcacuggaagaauucacggguuacauuacgauagucccguggucucuuaguggcauca	mir-183	284654	284644	0	10
group5_9744	mir-252	mir-252	pxy-mir-252	1.03e-10	dme-miR-252-5p	130000	cuaaguacuagugccgcaggag	ccugccgcuucagugcuuauca	cuaaguacuagugccgcaggaguguuugauauuucuccugccgcuucagugcuuauca	mir-17	260606	260027	0	579
group10_14867	mir-278	mir-278	bmo-mir-278	7.56e-21	dme-miR-278-3p	130000	ucggugggaucuucguccguuu	cccggacgaacuucccagcucgg	cccggacgaacuucccagcucggccgacauacacgggucggugggaucuucguccguuu	mir-278	257269	246722	0	10547
tig00002950_45644	mir-novel3	mir-novel3				120000	ucggugaaugccaacggauuuc	aauccuuugauauucaccggaa	ucggugaaugccaacggauuucguugcuuucgcaauacuuggaaauccuuugauauucaccggaa	mir-124	242963	240604	5	2354
tig00003240_group8_38424	mir-306	mir-306	bmo-mir-306a	1e-13	dme-miR-275-3p	120000	ucagguacuaggugacucugag	cggagccgccucgugccucauca	ucagguacuaggugacucugaguggccgcucucggagccgccucgugccucauca	mir-306	240922	240493	0	429
group19_29157	mir-novel4	mir-novel4				110000	cgauuaaaucaaaaucgucug	aggcgacuuugauuuaauccuu	aggcgacuuugauuuaauccuucaguuuauagcaacgauuaaaucaaaaucgucug	mir-62	219069	218650	0	419
group12_20864	mir-novel5-1	mir-novel5			bmo-miR-3429	66000	ucuuaauaccgcuguuaccuuaa	gagggcacaucaguauuaaaugu	gagggcacaucaguauuaaauguugaauugcacauacucuuaauaccgcuguuaccuuaa	#N/A	131251	130422	0	829
tig00001585_group12_38546	mir-novel5-2	mir-novel5			bmo-miR-3429	66000	ucuuaauaccgcuguuaccuuaa	gagggcacaucaguauuaaaugu	gagggcacaucaguauuaaauguugaauugcacauacucuuaauaccgcuguuaccuuaa	#N/A	131251	130422	0	829
group8_13500	mir-novel6-1	mir-novel6				62000	ccccggcgacauaauuucugag	aggggauuaugucuacgggaug	aggggauuaugucuacgggauggguuuacuuuacaccccggcgacauaauuucugag	#N/A	122348	122200	0	148
group8_13498	mir-novel6-2	mir-novel6				61000	ccccggcgacauaauuucugag	cuggaauuaugucuacgggaug	cuggaauuaugucuacgggauggguuuuuccuuacaccccggcgacauaauuucugag	mir-193	121470	121179	0	291
group25_34102	mir-novel7	mir-novel7				59000	cagaaaaccauguuccagccug	gcuggaacaugguuaucuaug	gcuggaacaugguuaucuaugcgugugucauguuccacagaaaaccauguuccagccug	mir-624	115860	114269	0	1591
group7_12518	mir-993	mir-993	mse-mir-993	8.53e-24	dme-miR-993-5p	54000	uacccuguagauccgggcuuuug	gaagcucgucucuacagguaucu	uacccuguagauccgggcuuuuguaguuuaguucacaucagaagcucgucucuacagguaucu	mir-10	106497	86049	0	20448
group19_29147	mir-novel8	mir-novel8				53000	cuaacuucaauaauacggcug	accgucuuauugaagauaaca	accgucuuauugaagauaacagugucuuguauauaugcuaacuucaauaauacggcug	#N/A	105546	104791	0	755
group4_9462	mir-308	mir-308	pxy-mir-308	2.59e-14	dme-miR-2a-3p	52000	aaucacaggauaauacugcgag	cgcaguauuacgccugugaaugu	cgcaguauuacgccugugaauguguuucuacuacaaucacaggauaauacugcgag	mir-308	102851	98668	0	4183
group20_30352	mir-281	mir-281	mse-mir-281	1.27e-25	dme-miR-281-2-5p	50000	aagagagcuauccgucgacagu	ugucauggaguugcucucuuua	aagagagcuauccgucgacaguauugccaguaaacacugucauggaguugcucucuuua	mir-46	99337	72938	0	26399
group3_6423	mir-998	mir-998	mse-mir-998	4e-16	dme-miR-285-3p	50000	uagcaccaugggauucagcuca	agcugugucccgugcggcugca	agcugugucccgugcggcugcaguguggcguguagcaccaugggauucagcuca	mir-16	98761	98714	0	47
group1_1709	mir-989	mir-989	bmo-mir-989a	8.02e-24	bmo-miR-989a	49000	gugugaugugacguaguggaag	gccauuaccucacagucacgu	gccauuaccucacagucacguggucuuggugguacaacgugugaugugacguaguggaag	#N/A	97356	97339	1	16
tig00001587_group15_38596	mir-375-1	mir-375	bmo-mir-375	2.64e-05	dme-miR-375-3p	47000	uuuguucgccccggcucgagucg	acccgagcggauugagcaaacu	acccgagcggauugagcaaacuauuugucuguuagcaaguuuguucgccccggcucgagucg	mir-600	93381	81544	2	11835
group15_25641	mir-375-2	mir-375	bmo-mir-375	2.64e-05	dme-miR-375-3p	47000	uuuguucgccccggcucgagucg	acccgagcggauugagcaaacu	acccgagcggauugagcaaacuauuugucuguuagcaaguuuguucgccccggcucgagucg	mir-600	93381	81544	2	11835
group12_18723	mir-279d-1	mir-279	bmo-mir-279d	0.000378	dme-miR-279-3p	46000	ugacuagauuaucacuuaucau	gauaagugauauucuauuucaag	gauaagugauauucuauuucaaguuguaauguaucuugacuagauuaucacuuaucau	mir-279	90441	90117	0	324
tig00000410_group12_38487	mir-279d-2	mir-279	bmo-mir-279d	0.000378	dme-miR-279-3p	46000	ugacuagauuaucacuuaucau	gauaagugauauucuauuucaag	gauaagugauauucuauuucaaguuguaauguaucuugacuagauuaucacuuaucau	mir-279	90441	90117	0	324
tig00000407_41030	mir-279d-3	mir-279	bmo-mir-279d	0.000378	dme-miR-279-3p	46000	ugacuagauuaucacuuaucau	gauaagugauauucuauuucaag	gauaagugauauucuauuucaaguuguaauguaucuugacuagauuaucacuuaucau	mir-279	90441	90117	0	324
group4_7289	mir-novel194	mir-novel194	bmo-mir-2a-1	1.88e-18		45000	ucacagccagcuuugaugagca	ccaucaaagucgguuuguuaua	ccaucaaagucgguuuguuauaggucagaacgaagcuaucacagccagcuuugaugagca	mir-2	89080	74591	0	14489
group2_6168	mir-novel9	mir-novel9				37000	gaucggcaaaguuggugguuc	accucuaauuuugcugacugu	accucuaauuuugcugacuguauguauugagaguacgaucggcaaaguuggugguuc	#N/A	73090	69635	0	3455
group3_6410	mir-2756	mir-2756	hme-mir-2756	2.57e-08	dme-miR-10-5p	35000	acccuguagcugcuaaggggcg	ccccugugcugcuacauuguac	acccuguagcugcuaaggggcguaguccuuguaaccgccccugugcugcuacauuguac	mir-10	69176	68548	0	628
group16_27008	mir-novel10	mir-novel10				32000	uuucagaagcucugguguccg	caacaccagagcuucuggaucu	uuucagaagcucugguguccgaagucuacaaucuccaacaccagagcuucuggaucu	mir-122	64112	63078	0	1034
group8_13573	mir-3327	mir-3327	bmo-mir-3327	3.24e-23	bmo-miR-3327-5p	28000	aacaacaggaauguuauguaca	uauguaacguuuuuguugucuu	aacaacaggaauguuauguacaguauacguauaauucuauauguaacguuuuuguugucuu	#N/A	55633	45410	0	10223
group0_1265	mir-2767	mir-2767	mse-mir-2767	0.000345	bmo-miR-2767	28000	caaguaaaucucgugcggccug	agccgcaagagauuuauuuaca	caaguaaaucucgugcggccugucuuaauucaagccgcaagagauuuauuuaca	mir-255	55301	55260	0	41
tig00003240_group8_38425	mir-79	mir-79	mse-mir-79	1.74e-15	dme-miR-4-3p	28000	auaaagcuagauuaccaaagca	cuuuggcgauuuagcuccguga	cuuuggcgauuuagcuccgugacgugugcaaugcucauaaagcuagauuaccaaagca	mir-9	55108	49220	0	5888
group20_30486	mir-novel11	mir-novel11				27000	uucaauuuaaugagaugucgcu	ccacaacucauuaaacuggaug	uucaauuuaaugagaugucgcuaguuuacccccauuuagccacaacucauuaaacuggaug	#N/A	54433	37700	0	16733
tig00002972_group25_39365	mir-novel12-1	mir-novel12			hsa-miR-4762-5p	24000	ucaaaucucuguguaugauugg	agucauacauagagaccugaag	agucauacauagagaccugaagcuauguugugccuucaaaucucuguguaugauugg	#N/A	48223	46874	0	1349
tig00004105_group25_39389	mir-novel12-2	mir-novel12			hsa-miR-4762-5p	24000	ucaaaucucuguguaugauugg	agucauacauagagaccugaag	agucauacauagagaccugaagcuauguugugccuucaaaucucuguguaugauugg	#N/A	48223	46874	0	1349
group25_34108	mir-novel12-3	mir-novel12			hsa-miR-4762-5p	24000	ucaaaucucuguguaugauugg	agucauacauagagaccugaag	agucauacauagagaccugaagcuauguugugccuucaaaucucuguguaugauugg	#N/A	48223	46874	0	1349
group4_7295	mir-2a	mir-2	hme-mir-2b	4.17e-10	dme-miR-2a-3p	24000	uaucacagccagcuuugaugagcg	ucucaaaguggcugucaugug	ucucaaaguggcugucaugugcguucccguguccauaucacagccagcuuugaugagcg	mir-2	47148	40594	0	6554
group8_13117	mir-305	mir-305	hme-mir-305	3.29e-26	dme-miR-305-5p	23000	auuguacuucaucaggugcucu	aggcgcuuguuggaguacacuua	auuguacuucaucaggugcucuggugaugaugguuccaggcgcuuguuggaguacacuua	mir-8	45587	43982	0	1605
group3_7214	mir-133	mir-133	bmo-mir-133	5.35e-25	dme-miR-133-3p	22000	uugguccccuucaaccagcugu	agcugguugacuucgggucaaau	agcugguugacuucgggucaaauuguaauuuuuauaucauuugguccccuucaaccagcugu	mir-133	44043	44020	0	23
group6_11371	mir-novel13	mir-novel13				22000	cucguaaguuguaagugccagc	cggcucuuacaaccuacgucgg	cggcucuuacaaccuacgucgguuguggagguccucguaaguuguaagugccagc	mir-785	43711	42323	0	1388
group4_7297	mir-2b	mir-2	hme-mir-2c	9.94e-08	dme-miR-2a-3p	21000	uaucacagccagcuuuguugacu	ccagcaaagggggugugacuug	ccagcaaagggggugugacuugccgcuauggaccauaucacagccagcuuuguugacu	mir-2	42324	36982	0	5342
group12_18867	mir-970	mir-970	bmo-mir-970	5.67e-28	dme-miR-970-3p	19000	ucauaagacacacgcggcucu	agccuugcgugugcucuuauuggua	agccuugcgugugcucuuauugguaguguggcugauaaucuaucauaagacacacgcggcucu	mir-3	38610	38580	0	30
group2_2697	mir-2733a-1	mir-2733	hme-mir-2733	0.002	dme-miR-3-3p	17000	ucacugggugugugauaauugu	aguugucacucgcucaguagaca	aguugucacucgcucaguagacaugucucucauucugucacugggugugugauaauugu	mir-156	35200	33120	0	2080
group2_2701	mir-2733a-2	mir-2733	pxy-mir-2733a	0.002	dme-miR-3-3p	17000	ucacuggguaugugaugauugu	aguugucacucgcucaguagaca	aguugucacucgcucaguagacaugucucucauucugucacuggguaugugaugauugu	mir-156	34676	32596	0	2080
group2_2709	mir-2733a-3	mir-2733	pxy-mir-2733a	0.002	dme-miR-3-3p	17000	ucacuggguaugugaugauugu	aguugucacucgcucaguagaca	aguugucacucgcucaguagacaugucucucauucugucacuggguaugugaugauugu	mir-156	34676	32596	0	2080
group2_2705	mir-2733a-4	mir-2733	pxy-mir-2733a	0.002	dme-miR-3-3p	17000	ucacuggguaugugaugauugu	aguugucacucgcucaguagaca	aguugucacucgcucaguagacaugucucucauucugucacuggguaugugaugauugu	mir-156	34676	32596	0	2080
group2_2711	mir-2733b-1	mir-2733	hme-mir-2733	0.002	dme-miR-3-3p	16000	ucacugggugugugauaauugu	aguugucacucgcucagu	aguugucacucgcucaguggacaugucucucauucugucacugggugugugauaauugu	mir-156	33191	33120	0	71
group2_2703	mir-2733b-2	mir-2733	hme-mir-2733	0.001	dme-miR-3-3p	16000	ucacugggugugugauaauugu	aguugucacucacuuaguagaca	aguugucacucacuuaguagacaugucucauucugucacugggugugugauaauugu	mir-221	33127	33120	0	7
group2_2707	mir-2733b-3	mir-2733	hme-mir-2733	0.001	dme-miR-3-3p	16000	ucacugggugugugauaauugu	aguugucacucgcuuaguaga	aguugucacucgcuuaguagacaugucucauucugucacugggugugugauaauugu	mir-221	33124	33120	0	4
group2_2699	mir-2733b-4	mir-2733	hme-mir-2733	0.001	dme-miR-3-3p	16000	ucacugggugugugauaauugu	aguugucacucgcuuaguaga	aguugucacucgcuuaguagacaugucucauucugucacugggugugugauaauugu	mir-221	33124	33120	0	4
group6_11095	mir-750	mir-750	mse-mir-750	1.85e-15	bmo-miR-750-3p	15000	ccagaucuaucuuuccagcuca	aguuggacaggggaucuugaca	aguuggacaggggaucuugacaguuugagccaugugcugccagaucuaucuuuccagcuca	#N/A	31184	31141	0	43
group25_32812	mir-3477	mir-3477	tca-mir-3477	1.01e-08	dme-miR-304-5p	15000	uaaucucauuugguaacuguga	cagauuaccauaugggguuuga	uaaucucauuugguaacugugagguuuccgaacgcagugcccuggcgccugggcccgcgacacucagauuaccauaugggguuuga	mir-874	30653	30425	2	226
group4_7285	mir-71	mir-71	bmo-mir-71	7.76e-18	tca-miR-71-3p	14000	ucucacuaccuugucuuucaug	ugaaagacagggguagugaga	ugaaagacagggguagugagauguccaggacaucacaaauucucacuaccuugucuuucaug	mir-71	29033	23625	37	5371
group17_28005	mir-745	mir-745	mse-mir-745	3.1e-23	bmo-miR-745-5p	14000	cggcucaucguauggcaguuugc	cagcugccuagcgaagggcaaca	cggcucaucguauggcaguuugcuguguaguuuugccagcugccuagcgaagggcaaca	#N/A	28227	19853	0	8374
group19_29163	mir-novel14-1	mir-novel14				13000	uuucagcaacaugaagacaauug	auugcuucauguuucugaaaaa	auugcuucauguuucugaaaaauguauguuuucuuuuucagcaacaugaagacaauug	mir-24	26037	17716	0	8321
tig00001972_43491	mir-novel14-2	mir-novel14				13000	uuucagcaacaugaagacaauug	auugcuucauguuucugaaaaa	auugcuucauguuucugaaaaauguuuguuuucuuuuucagcaacaugaagacaauug	mir-24	26025	17716	0	8309
tig00001972_43499	mir-novel14-3	mir-novel14				13000	uuucagcaacaugaagacaauug	auugcuucauguuucugaaaaa	auugcuucauguuucugaaaaauguuuguuuucuuuuucagcaacaugaagacaauug	mir-24	26025	17716	0	8309
group11_16302	mir-novel17	mir-novel17				12000	cuagcuucaucaaaagaccc	gucucuugaugaugcuuacg	cuagcuucaucaaaagaccccuggauguagagagggucucuugaugaugcuuacg	mir-172	24566	23324	0	1242
group15_25713	mir-92a	mir-92	mse-mir-92a	7.12e-18	dme-miR-92a-3p	11000	uauugcaccagucccggccuau	gggcggugacuggugcuauauu	gggcggugacuggugcuauauucgguuugugugcgauauugcaccagucccggccuau	mir-92	23321	22569	0	752
group15_25715	mir-92b	mir-92	bmo-mir-92b	6.76e-12	dme-miR-92a-3p	11000	aauugcaccaaucccggccugc	aggacgcgauucgguguaaacguug	aggacgcgauucgguguaaacguugugacuuguaucaaauugcaccaaucccggccugc	#N/A	22084	19528	0	2556
group8_13577	mir-2779	mir-2779	bmo-mir-2779	0.002		10000	acaaauccggcucgaaggacca	uguuguccgaauuaguguau	acaaauccggcucgaaggaccacuuuguugcuguugagcgcaugggcucaccguaaaacaaacucugguguuguccgaauuaguguau	mir-338	20665	20599	50	16
group6_12078	mir-novel192	mir-novel192				10000	cuuuaucgacaaaaaaaacagc	guguuuuuugucgacgaaggc	guguuuuuugucgacgaaggcacgcuauaguaucuuuaucgacaaaaaaaacagc	mir-338	19690	19459	0	231
tig00000260_40967	mir-iab-8	mir-iab-8	mse-mir-iab-4	8.05e-21	dme-miR-iab-8-5p	9900	uuacguauacugaagguauaccgga	aggauacauucaguauacguac	uuacguauacugaagguauaccggaaagaaugaggcacucaggauacauucaguauacguac	mir-iab-4	19511	18749	1	761
group6_11706	mir-87	mir-87	bmo-mir-87	1.68e-09	dme-miR-87-3p	9300	gugagcaaacuuucaggugugu	gggccugaauuguugcucgaaccu	gggccugaauuguugcucgaaccuguguuuuaaucaaggugagcaaacuuucaggugugu	mir-87	18292	16902	0	1390
group4_8302	mir-novel18-1	mir-novel18				8500	uaguagggugcugggccccgu	ggagcccagcacccgacugcc	ggagcccagcacccgacugccgagucgaacaaaaacagguaguagggugcugggccccgu	mir-221	16821	16785	19	17
group4_8301	mir-novel18-2	mir-novel18				8500	uaguagggugcugggccccgu	auauguuaagcacuguugcugcgguc	uaguagggugcugggccccguauauguuaagcacuguugcugcgguc	#N/A	16791	16785	0	6
group20_30586	mir-282	mir-282	hme-mir-282	8.43e-24	dme-miR-282-5p	8400	uagccucuccuuggcuuugucu	acauagccugauagagguuacg	uagccucuccuuggcuuugucuguaucuuaaagauguuucagacauagccugauagagguuacg	mir-282	16572	16254	0	318
group4_7857	mir-novel19	mir-novel19				8200	cucuguugcuccauuugacucg	cgucaaauggagccauaaaac	cgucaaauggagccauaaaacauuuauuuuuauaauaugcucuguugcuccauuugacucg	mir-147	16214	13914	0	2300
group19_29153	mir-novel20	mir-novel20				8000	cuaacuucaauaaucugucgg	ggcgucuuauugaaguuaaca	ggcgucuuauugaaguuaacaauuuugugugauuuugaugcuaacuucaauaaucugucgg	mir-999	15751	15744	3	4
group25_32810	mir-283	mir-283	hme-mir-283	9.5e-08	dme-miR-283-5p	7500	aaauaucagcugguaauucuggg	cagucugccggcugauaugcgg	aaauaucagcugguaauucuggggugaagucucccagucugccggcugauaugcgg	mir-283	14790	14756	0	34
group14_24528	mir-316-1	mir-316	mse-mir-316	8.22e-21	dme-miR-316-5p	6400	ugucuuuuuccgcuuugcugcug	acagcaaagagaaaaggucucc	ugucuuuuuccgcuuugcugcugauaauuaugauuaugucaacagcaaagagaaaaggucucc	mir-14	12668	12446	1	221
group0_440	mir-316-2	mir-316	mse-mir-316	8.22e-21	dme-miR-316-5p	6400	ugucuuuuuccgcuuugcugcug	acagcaaagagaaaaggucucc	ugucuuuuuccgcuuugcugcugauaauuaugauuaugucaacagcaaagagaaaaggucucc	mir-14	12668	12446	1	221
group15_25481	mir-988	mir-988	dme-mir-988	6.81e-06	dme-miR-988-3p	5800	ccccuuguuacaaaccucaccu	gugugcguuguggcaaaggagau	gugugcguuguggcaaaggagaucuguuuaauugcgaucauccccuuguuacaaaccucaccu	mir-988	11473	9943	3	1527
group5_9741	mir-novel21	mir-novel21				5600	uggcgucucuuuugcacaacug	agucguggaagcgagacggcac	agucguggaagcgagacggcacuacacggcucacaguggcgucucuuuugcacaacug	mir-14	11159	10811	0	348
tig00000312_group0_38169	mir-novel22-1	mir-novel22			dme-miR-980-5p	5600	cguuuuucuuucguucccugc	cgggggcgacaggaacacaua	cguuuuucuuucguucccugcauguuucaggagcauuguuucauacaaugccucugucauaucccgggggcgacaggaacacaua	#N/A	11106	10516	3	587
group0_1049	mir-novel22-2	mir-novel22			dme-miR-980-5p	5600	cguuuuucuuucguucccugc	cgggggcgacaggaacacaua	cguuuuucuuucguucccugcauguuucaggagcauuguuucauacaaugccucugucauaucccgggggcgacaggaacacaua	#N/A	11106	10516	3	587
tig00002196_group19_38876	mir-novel23	mir-novel23			dme-miR-279-3p	5500	ugacuagaucccgacucuggcca	uacagagucggauuugguuccc	ugacuagaucccgacucuggccauuguauuaaguaauguacagagucggauuugguuccc	#N/A	10938	9620	0	1318
group19_29873	mir-novel24	mir-novel24				5100	cccgagaacgcuugcggauccu	cguccgcaaguguucccgcgacu	cccgagaacgcuugcggauccuuuuccccuaagcguccgcaaguguucccgcgacu	mir-883	10168	9968	0	200
group4_7293	mir-13	mir-13	bmo-mir-13b	6.08e-09	dme-miR-2a-3p	5000	uaucacagccauuuuugacgagu	ucguaaaaaugguugugccaug	ucguaaaaaugguugugccauguagucaacucauaucacagccauuuuugacgagu	mir-2	9980	9567	0	413
group10_15272	mir-307	mir-307	bmo-mir-307	2.58e-33	dme-miR-307a-3p	4800	ucacaaccuccuugagugagcga	acucacucaaccugggugugau	acucacucaaccugggugugaugugugcacucguugcucggcccaucacaaccuccuugagugagcga	mir-2	9550	9134	43	373
group6_11183	mir-novel25	mir-novel25				4600	acacagccgcggauauagcuca	agcuuuauccucggcugcaucg	agcuuuauccucggcugcaucguagauccagucgacacagccgcggauauagcuca	#N/A	9178	8694	0	484
group6_11802	mir-novel26	mir-novel26				4000	uucugucaacuccucccauguucuu	uccauggguugagcugccaaaaauu	uccauggguugagcugccaaaaauuggucuuuucugucaacuccucccauguucuu	#N/A	7994	7993	0	1
group17_27659	mir-novel27	mir-novel27			dme-miR-1007-3p	3800	aaagcucaugguuaaagacucu	aguucuuaaacaugagcuaaucg	aguucuuaaacaugagcuaaucgcgcgaugucucgcuugccgaaagcucaugguuaaagacucu	#N/A	7510	7491	0	19
group14_24566	mir-965	mir-965	bmo-mir-965	1.06e-07	bmo-miR-965-5p	3600	cgggagaaguuguaccgcuauau	uaagcguauagcuuuuccccuu	cgggagaaguuguaccgcuauauguuaauugugcugucauaagcguauagcuuuuccccuu	mir-965	7190	5663	0	1527
group1_2282	mir-33	mir-33	mse-mir-33	1.08e-07	tca-miR-3803-5p	3400	caauauuacuacaaggcaaauc	gugcauuguaguugcauugcac	gugcauuguaguugcauugcacuggauuuaaugaguugugcaauauuacuacaaggcaaauc	mir-33	6740	2279	877	3584
group21_30933	mir-927a	mir-927	bmo-mir-1926	2.07e-24	dme-miR-927-5p	3200	uuuagaauuccuacgcuuuacc	caaagcguuuggauucuaaaac	uuuagaauuccuacgcuuuaccguugccaagauguugggcaaagcguuuggauucuaaaac	mir-927	6455	5348	0	1107
group19_29140	mir-novel28	mir-novel28				2900	ucaucccucacaggauguaacu	ucacguccugugagggguggag	ucaucccucacaggauguaacuugucuuagauuucaugagucacguccugugagggguggag	mir-2	5859	5716	0	143
group6_11097	mir-1175	mir-1175	bmo-mir-1175	1.31e-22	dme-miR-958-3p	2900	ugagauucaacuccuccaacuuaa	aaguggaggugugaucucuuca	aaguggaggugugaucucuucacuuuuuuuucuuaaagugagauucaacuccuccaacuuaa	mir-268	5829	4754	0	1075
group1_1528	mir-novel29	mir-novel29				2900	uacccugcaaugggacaaugc	auugccucacugccgggcaaa	uacccugcaaugggacaaugcuggcuuaagaauacauugccucacugccgggcaaa	#N/A	5814	5732	0	82
group12_18816	mir-2765	mir-2765	mse-mir-2765	6.71e-15	bmo-miR-2765	2800	ugguaacuccaccaccguuggc	caacgggggcugaguuccuaca	ugguaacuccaccaccguuggcggugaccaugcgccaacgggggcugaguuccuaca	mir-549	5630	5275	0	355
group19_29159	mir-novel30	mir-novel30				2800	cucucgcgcuuuguacuucucu	augaaguacaccgcgcgcgaaga	augaaguacaccgcgcgcgaagaaugauacucgccucucgcgcuuuguacuucucu	#N/A	5556	5483	0	73
tig00002196_group19_38882	mir-novel31	mir-novel31			dme-miR-279-3p	2700	ugacuagacccccguugaaaaga	uuuuuaaucgguugucuaucgcc	ugacuagacccccguugaaaagacguauuuaaucgacucuuuuuaaucgguugucuaucgcc	#N/A	5437	3530	0	1907
group23_31481	mir-8506	mir-8506	pxy-mir-8506	1.48e-06		2400	uuaggugugagggucacagcaa	gcugugaccuucacacuuagu	gcugugaccuucacacuuaguacgugccucccuauuaggugugagggucacagcaa	mir-652	4871	3542	0	1329
group20_30608	mir-novel33	mir-novel33				2400	gacagcgguauucaaucugcuu	cagauugcguaccgcaguccgg	cagauugcguaccgcaguccggcugcucgcacggacagcgguauucaaucugcuu	mir-577	4812	4811	0	1
group19_29761	mir-novel34-1	mir-novel34				2300	uuucuuauggaaucgugucuaugu	auaggcggguuuccauaaaagca	uuucuuauggaaucgugucuauguuacucguaguacauaggcggguuuccauaaaagca	#N/A	4687	4592	0	95
tig00004208_group19_38952	mir-novel34-2	mir-novel34				2300	uuucuuauggaaucgugucuaugu	auaggcggguuuccauaaaagca	uuucuuauggaaucgugucuauguuacucguaguacauaggcggguuuccauaaaagca	#N/A	4687	4592	0	95
group19_29823	mir-novel34-3	mir-novel34				2300	uuucuuauggaaucgugucuaugu	uagacggcuuuccauaaaaaca	uuucuuauggaaucgugucuauguuacucguaguacauagacggcuuuccauaaaaaca	#N/A	4634	4592	0	42
group14_24896	mir-932-1	mir-932	hme-mir-932	1.2e-22	dme-miR-932-5p	2200	ucaauuccguagugcauugcag	ugcaagcagugcggaagugagg	ucaauuccguagugcauugcagugcauccugcccccugcaagcagugcggaagugagg	mir-33	4501	3900	0	601
group14_24552	mir-932-2	mir-932	hme-mir-932	1.2e-22	dme-miR-932-5p	2200	ucaauuccguagugcauugcag	ugcaagcagugcggaagugagg	ucaauuccguagugcauugcagugcauccugcccccugcaagcagugcggaagugagg	mir-33	4501	3900	0	601
group19_28754	mir-novel35	mir-novel35				2100	gacgccgccauuguauccuca	aggguacaauggcggucuugu	gacgccgccauuguauccucaugggauaaggauuuaggguacaauggcggucuugu	#N/A	4266	3870	0	396
group16_27074	mir-novel36	mir-novel36				2000	uuaccccuucgaaaaggcuaga	aggccuuuucaaaaggguuaga	aggccuuuucaaaaggguuagauaucauuaacauacauuuaccccuucgaaaaggcuaga	#N/A	4077	4057	0	20
group25_32940	mir-novel37	mir-novel37				2000	cccgaugcuggucguauacau	uguguacggccagcaucggcca	cccgaugcuggucguauacauauuauauguuauauguguguacggccagcaucggcca	#N/A	4036	4024	0	12
group19_29763	mir-novel38	mir-novel38			hsa-miR-3976	2000	uauagagaguuguuggguccugu	acggccugacuuccucuaaagc	uauagagaguuguuggguccuguuacucacaguacacggccugacuuccucuaaagc	mir-308	4004	3561	0	443
group12_18791	mir-novel39	mir-novel39	bdi-MIR437	0.002	dme-miR-1000-5p	1800	uuauuguccgauuaacaacuag	guuuguuaaucggaaaauaguu	guuuguuaaucggaaaauaguuguguaauaugaauacauauauuauucuaauuaauuauuguccgauuaacaacuag	mir-582	3633	3535	0	98
group19_29766	mir-novel40	mir-novel40				1800	ugguacuguccaccucuaaagu	uuuaggggucgauaguauaugu	uuuaggggucgauaguauauguuacuugcaguacugguacuguccaccucuaaagu	mir-101	3530	3156	0	374
group19_28750	mir-novel41	mir-novel41				1700	ugcuugaauuguagaagguuuu	auuuuuuacguuauuuuu	ugcuugaauuguagaagguuuuguuauuuuuuacguuauuuuu	#N/A	3505	3504	0	1
group19_28725	mir-novel42	mir-novel42			hsa-miR-5682	1700	uuagcaccaacugagagcccg	gacacucacuuggaacuaaag	gacacucacuuggaacuaaagcguucgauauccuuuagcaccaacugagagcccg	#N/A	3374	3310	0	64
group6_12148	mir-novel43	mir-novel43			hsa-miR-513b-3p	1600	uaaugucauucugacagcauaau	uuggcugucaaugugauauuuu	uuggcugucaaugugauauuuuuguagaaaauaaugucauucugacagcauaau	mir-23	3267	2551	0	716
group1_2163	mir-novel44	mir-novel44				1600	uguacacuuuggaaaagucca	uuuuucaaaguggacccg	uguacacuuuggaaaaguccagaguaugauucguggacuuuuucaaaguggacccg	#N/A	3247	3177	0	70
group19_29141	mir-novel45	mir-novel45				1500	uaucggagauugggucuuggg	aaggcccaaucgcucgcuacag	aaggcccaaucgcucgcuacagcacucggccuguaucggagauugggucuuggg	#N/A	3075	2396	0	679
group19_29774	mir-novel46a	mir-novel46			tca-miR-6011-3p	1400	uagaacuguccucuucuaaagc	uuuagcaguuggcagacuaagu	uuuagcaguuggcagacuaaguuucuugcaguacuagaacuguccucuucuaaagc	mir-583	2891	2043	0	848
group19_29800	mir-novel46b	mir-novel46			hsa-miR-3169	1300	uaggacuguccucuucuaaagc	uuuagcaguugacaggcuaagu	uuuagcaguugacaggcuaaguuacuugcaguacuaggacuguccucuucuaaagc	mir-583	2735	2714	0	21
group19_29785	mir-novel47-1	mir-novel47				1300	uucuuucuggaaauugacgaug	ugguccguuucuauaaagauau	uucuuucuggaaauugacgauguuacucgaaguacaugguccguuucuauaaagauau	#N/A	2692	2660	0	32
group19_29805	mir-novel47-2	mir-novel47				1300	uucuuucuggaaauugacgaug	ugguccguuucuauaaagauau	uucuuucuggaaauugacgauguuacucgaaguacaugguccguuucuauaaagauau	#N/A	2692	2660	0	32
tig00000757_41308	mir-novel48	mir-novel48				1200	ucaguuuguuuggcucgcugggaaa	ucacagcacgcugcaaggaacgcauuc	ucacagcacgcugcaaggaacgcauucucaguuuguuuggcucgcugggaaa	#N/A	2501	2498	0	3
group6_11702	mir-novel49	mir-novel49			tca-miR-3805a-5p	1200	caucacaucugguauggauggu	agucccauacccgaugagaugcc	agucccauacccgaugagaugccgaguagccggcaucacaucugguauggauggu	#N/A	2387	2375	0	12
group0_712	mir-novel50	mir-novel50				1200	cuguaauggaacacuggcuucg	uggacaguuguccaauacaguu	uggacaguuguccaauacaguuuuguucuagcaacuguaauggaacacuggcuucg	mir-367	2362	2054	0	308
group2_6082	mir-193	mir-193	mse-mir-193	3.86e-13	dme-miR-193-3p	1100	uacuggccugcuaagucccaa	agggucuuggcggucuggucgg	agggucuuggcggucuggucggugugugauucuuacuggccugcuaagucccaa	mir-193	2256	2255	0	1
tig00003034_45931	mir-novel51	mir-novel51				1100	ucugcacacccuuugagauauau	ucuggcucaaucaguguguaaau	ucugcacacccuuugagauauauuauauuugauaaucuggcucaaucaguguguaaau	#N/A	2199	1744	0	455
group0_326	mir-novel52	mir-novel52				1000	uggccaaugcgucgcucuuugu	ccgagauguaccgcaauggcaca	uggccaaugcgucgcucuuuguaaucacuaaugguuaccgagauguaccgcaauggcaca	#N/A	2145	2096	1	48
group19_29769	mir-novel53-1	mir-novel53			hsa-miR-4477b	1000	uuuaaggaguuguuaggacaugu	acgcccugacuuccucuaaagc	uuuaaggaguuguuaggacauguuacuugcaguacacgcccugacuuccucuaaagc	#N/A	2119	1950	0	169
group19_29783	mir-novel53-2	mir-novel53			hsa-miR-4477b	1000	uuuaaggaguuguuaggacaugu	acgcccugacuuccucuaaagc	uuuaaggaguuguuaggacauguuacuugcaguacacgcccugacuuccucuaaagc	#N/A	2119	1950	0	169
group19_29803	mir-novel53-3	mir-novel53			hsa-miR-4477b	1000	uuuaaggaguuguuaggacaugu	acgcccugacuuccucuaaagc	uuuaaggaguuguuaggacauguuacuugcaguacacgcccugacuuccucuaaagc	#N/A	2119	1950	0	169
group19_29794	mir-novel54	mir-novel54			tca-miR-6011-3p	1000	uagaacuguccucuucuaaagc	uuuagcaguugacaggcuaagu	uuuagcaguugacaggcuaaguuacuugcaguacuagaacuguccucuucuaaagc	mir-583	2064	2043	0	21
group19_29798	mir-novel55-1	mir-novel55				1000	ugguacugcccaccucuaaagu	uuuaggggucgauaguauaugu	uuuaggggucgauaguauauguuacuugcaguacugguacugcccaccucuaaagu	#N/A	2065	1691	0	374
group19_29792	mir-novel55-2	mir-novel55				1000	ugguacugcccaccucuaaagu	uuuaggggucgauaguauaugu	uuuaggggucgauaguauauguuacuugcaguacugguacugcccaccucuaaagu	#N/A	2065	1691	0	374
group0_732	mir-novel56	mir-novel56			bmo-miR-2731	910	cgcgagacguaaauugucguuu	aggcaacuuacgucccgcgcu	aggcaacuuacgucccgcgcucgggucgcacagcgcgagacguaaauugucguuu	mir-275	1786	1783	0	3
group1_2368	mir-3286	mir-3286	hme-mir-3286	7.83e-18	bmo-miR-210	900	uugugcguguucuaauaguugu	aacuauugggcacugcacagga	aacuauugggcacugcacaggacuaguaacccgaauauacucuugugcguguucuaauaguugu	mir-210	1764	1736	1	27
group19_29801	mir-novel57	mir-novel57				900	ucuagggcuugccauccucugu	acgggcugacauccucuacagc	ucuagggcuugccauccucuguuacuugcaguacacgggcugacauccucuacagc	#N/A	1770	1185	0	585
group11_16141	mir-novel58	mir-novel58				890	uacaguuaagaaaaaacguuguaga	uaugauauacuuuuacuuagaaauua	uaugauauacuuuuacuuagaaauuauuagaauauacaguuaagaaaaaacguuguaga	mir-1302	1801	1251	0	550
group4_7895	mir-novel59	mir-novel59			bmo-miR-3272	870	aaaacaguacauuucuuuagaa	uauggaaaugcaagcugacguugg	uauggaaaugcaagcugacguuggcgugucuaugauaccaaaacaguacauuucuuuagaa	#N/A	1710	1654	0	56
group1_1607	mir-137	mir-137	hme-mir-137	8.5e-27	dme-miR-137-3p	850	uauugcuugagaauacacguag	acgcguauucuuggggaauuaac	acgcguauucuuggggaauuaacacacauuacgagauguuauugcuugagaauacacguag	mir-137	1677	1671	0	6
group11_16485	mir-novel60	mir-novel60				830	uuagaaguggcucacgaggg	cucaugagccacuucuaaca	cucaugagccacuucuaacacuggguugauuguuagaaguggcucacgaggg	mir-3	1639	1268	0	371
group12_18787	mir-novel61	mir-novel61	bdi-MIR437	0.002	dme-miR-1000-5p	820	uuauugucugauuaaaaacuag	guuuguuaaucggaaaauaguu	guuuguuaaucggaaaauaguuguguaauaugaauacauauauuauucuaaucaauuauugucugauuaaaaacuag	mir-590	1607	1509	0	98
group4_7307	mir-novel62	mir-novel62				790	aucgugaauaucuuuauuacag	guaaauaaacauauucacgacu	guaaauaaacauauucacgacucuuuuuuauagagcaauguuaaaaauauguuacaucgugaauaucuuuauuacag	#N/A	1560	1554	0	6
group19_29817	mir-novel63	mir-novel63				790	uuauuuauggaauugugucuaug	auaggcggguuuccauaaaagca	uuauuuauggaauugugucuauguuacucguaguacauaggcggguuuccauaaaagca	#N/A	1553	1458	0	95
group3_7086	mir-124	mir-124	api-mir-124	2.63e-08	dme-miR-124-3p	670	uaaggcacgcggugaaugcca	gcguucacugccggggccauaug	gcguucacugccggggccauauguguguuauaaaaaucauaaggcacgcggugaaugcca	mir-9	1320	1319	0	1
group12_19443	mir-263b	mir-263	hme-mir-263b	4.76e-19	dme-miR-263b-5p	670	cuuggcacugggagaauucacag	cgugaauuuccugaugccuca	cuuggcacugggagaauucacaggaguuguguaaauacccgugaauuuccugaugccuca	mir-183	1314	538	0	776
group16_27173	mir-novel64-1	mir-novel64			hsa-miR-1262	660	gugggugacggugggugguug	cuaauucacgguuauucaag	gugggugacggugggugguugugagguugaugcggaaguauaugaaaaauucuaauucacgguuauucaag	#N/A	1313	1284	26	3
tig00000787_group16_38647	mir-novel64-2	mir-novel64			hsa-miR-1262	660	gugggugacggugggugguug	cuaauucacgguuauucaag	gugggugacggugggugguugugagguugaugcggaaguauaugaaaaauucuaauucacgguuauucaag	#N/A	1313	1284	26	3
tig00003240_group8_38432	mir-9c	mir-9	hme-mir-9a	1.84e-18		630	uacagcuaggauaccaaagaga	acuucgguaccauaacuuuagg	acuucgguaccauaacuuuagggucugcgaacacgccuacagcuaggauaccaaagaga	mir-9	1253	1080	0	173
group19_29963	mir-novel65	mir-novel65			hsa-miR-4742-3p	630	ucuguauuuuguacgucggugguau	uauacaaaaucuuccagauauaguc	ucuguauuuuguacgucggugguaugucuuuuccagcguauacaaaaucuuccagauauaguc	#N/A	1251	1224	0	27
group19_29821	mir-novel66a	mir-novel66				630	ucuagggcuugccauccucugu	acgggcugacauccucuaaagc	ucuagggcuugccauccucuguuacuugcaguacacgggcugacauccucuaaagc	#N/A	1242	1185	0	57
group19_29781	mir-novel66b	mir-novel66				630	ucuagggcuugccauccucugu	acgggcugacauccucuaaagc	ucuagggcuugccauccucuguuacuugcaguacacgggcugacauccucuaaagc	#N/A	1242	1185	0	57
group19_29767	mir-novel66c	mir-novel66				620	ucuagggcuugccauccucugu	acgggcugacauccucuaaagc	ucuagggcuugccauccucuguuacuugcaguacacgggcugacauccucuaaagc	#N/A	1245	1188	0	57
tig00003034_45926	mir-novel67	mir-novel67				610	ccaucacgucauugugguaga	uuccaccaugacgaaaugccg	uuccaccaugacgaaaugccguagucuugaaagaucgccaucacgucauugugguaga	#N/A	1202	1112	0	90
group6_11601	mir-929	mir-929	hme-mir-929	2.77e-14	dme-miR-929-3p	590	cucccuaaucgagucagguuga	aaauugacucuaguagggagucc	aaauugacucuaguagggaguccguauuaaugcgugacucccuaaucgagucagguuga	mir-929	1161	816	0	345
tig00003034_45930	mir-novel68	mir-novel68			tca-miR-71-3p	570	ucucacuaaaaggucuuuguggaa	cgcaaaagaauuuagugacgga	cgcaaaagaauuuagugacggauuuuuuucauuaaucucucacuaaaaggucuuuguggaa	mir-71	1115	1067	0	48
tig00001972_43495	mir-novel69	mir-novel69				550	cucucgcgcauuguacuucucu	augaaguacaccgcgcgcgaag	augaaguacaccgcgcgcgaaggaugacuaucgccucucgcgcauuguacuucucu	#N/A	1092	1071	0	21
group19_29831	mir-novel70	mir-novel70				540	ccgcugucgagucuguucugugu	caguccugccucgacacagcac	ccgcugucgagucuguucuguguuacucguaguacacaguccugccucgacacagcac	#N/A	1065	1050	0	15
group19_29843	mir-novel71a	mir-novel71				500	ugucuuauggaucuguaucuaugu	auagauccguuuccauaaaagc	ugucuuauggaucuguaucuauguuucucguaauacauagauccguuuccauaaaagc	#N/A	988	911	0	77
group19_29839	mir-novel71b	mir-novel71				500	ugucuuauggaucuguaucuaugu	auagauccguuuccauaaaagc	ugucuuauggaucuguaucuauguuucucguaauacauagauccguuuccauaaaagc	#N/A	988	911	0	77
group25_32938	mir-1000a	mir-1000	aga-mir-1000	1.06e-07	dme-miR-1000-5p	480	auauuguccugucacagcagua	cugcugggucgggacaagcggg	auauuguccugucacagcaguacguguugccuacaguuacugcugggucgggacaagcggg	mir-554	937	882	1	54
tig00003327_group24_39283	mir-novel72	mir-novel72				480	uccucccuuuggcuuugucaau	ucacauugcccgagggaguac	ucacauugcccgagggaguacgcgugguaugacguccucccuuuggcuuugucaau	#N/A	949	948	0	1
group19_29812	mir-novel73	mir-novel73			hsa-miR-3620-3p	470	acacccugacuuccucuaaagc	uuuagggaguaguuaggucaugu	uuuagggaguaguuaggucauguuacuugcaguacacacccugacuuccucuaaagc	#N/A	927	829	0	98
group14_24912	mir-6094	mir-6094	mse-mir-6094	1.49e-07	dme-miR-314-3p	450	uauucgagaccucugcugauccu	aucagcgguggucugggguacc	aucagcgguggucugggguaccuaacagcggccucucuaccauuugcucggccgguugguauucgagaccucugcugauccu	#N/A	893	877	0	16
group19_29837	mir-novel74a	mir-novel74			hsa-miR-1234-3p	440	acggccugacuuccucuaaagc	uuuagggaguuguuaggacaugu	uuuagggaguuguuaggacauguuacuugcaguacacggccugacuuccucuaaagc	#N/A	863	443	0	420
group19_29787	mir-novel74b	mir-novel74				410	acgggcugacuuccucuaaagc	uuuagggaguuguuaggugaugu	uuuagggaguuguuaggugauguuacuugcaguacacgggcugacuuccucuaaagc	#N/A	819	747	0	72
group19_29775	mir-novel75	mir-novel75				390	uuauuuauggaaucaugucuaugu	auaggcggguuuccauaaaagca	uuauuuauggaaucaugucuauguuacucguaguacauaggcggguuuccauaaaagca	#N/A	781	686	0	95
group19_30183	mir-novel76	mir-novel76			hsa-miR-4493	390	ugaaggcccuacaucgcagcug	gcugcgguggugagccuucaa	ugaaggcccuacaucgcagcuguggcaaagugaagcugcgguggugagccuucaa	mir-30	762	493	0	269
group17_28031	mir-novel77	mir-novel77				350	uuagauauguuguuggguacu	uaucccagauauuuuuuaac	uuagauauguuguuggguacuuuuuaucccagauauuuuuuaac	#N/A	742	741	0	1
tig00003034_45935	mir-novel78	mir-novel78				340	agcauaacuggugugauaga	cgucacagcagucaugccgccu	agcauaacuggugugauagauuguuuaacauaccuauauccgucacagcagucaugccgccu	mir-6	674	578	0	96
group8_13298	mir-novel79	mir-novel79				340	augaacaagggcacgaauuaag	uaauucguguccuuguuaauuu	augaacaagggcacgaauuaagguauauuuacacuuaauucguguccuuguuaauuu	mir-358	667	517	0	150
tig00000111_40810	mir-novel80	mir-novel80				320	uggucaacuaggugcacguauuucu	aauucaugcauuuaaggguuaaggau	aauucaugcauuuaaggguuaaggaugcaagcuauggucaacuaggugcacguauuucu	#N/A	690	668	0	22
group0_1277	mir-novel81	mir-novel81				310	ugacaaguuguguggugacucguau	uaucaagucaucaucccgacuuaua	ugacaaguuguguggugacucguaugcguuaucaagucaucaucccgacuuaua	#N/A	619	614	0	5
group17_27643	mir-2786	mir-2786	bmo-mir-2786	0.000104		310	cucucucgccuccaugaccuga	aggccaugcaagcgaaggaaua	aggccaugcaagcgaaggaauaugugcaucccaccguguacucucucgccuccaugaccuga	mir-156	607	603	0	4
group27_35402	mir-novel82	mir-novel82				290	aagugaaugauuugccaacugggau	uucuugggauuucacauaccgccacuu	aagugaaugauuugccaacugggaugucgacagacugcggcuugcgcaaucugcgggauuuucuugggauuucacauaccgccacuu	mir-987	595	463	5	127
tig00002196_group19_38883	mir-novel83	mir-novel83	oha-mir-2985a-2	0.000441		290	uauaguauuccuccuucccugaa	caggaauaaggaaugccauga	caggaauaaggaaugccaugaaagguuuuuuuuuauuuuuauuuuauaguauuccuccuucccugaa	mir-644	582	516	3	63
group19_28731	mir-novel84	mir-novel84			dme-miR-133-3p	290	uuggucccucauacaaccugu	gguuuguaugcgggauccuaagu	gguuuguaugcgggauccuaagucugcuaauugucacuuggucccucauacaaccugu	#N/A	565	564	0	1
tig00003034_45924	mir-novel85	mir-novel85				290	aaucuggaagaacaaaacgauaa	cucguuguguccuuucaaauuuc	cucguuguguccuuucaaauuucauguuauacguaaucuggaagaacaaaacgauaa	#N/A	580	481	0	99
group7_12839	mir-novel86	mir-novel86				270	aaugcgaaagcucugaacuuuc	caaguucagagcuuucgcauuua	aaugcgaaagcucugaacuuucgcauucagagcuuucagagcuuucgcaaguucagagcuuucgcauuua	mir-83	529	338	4	187
group1_2246	mir-981a	mir-981	hme-mir-981	1.61e-09	dme-miR-981-3p	270	uucguugucgacgaaaccugca	cggguuucgggauaacggaac	cggguuucgggauaacggaaccgugauuaaaauugguucguugucgacgaaaccugca	mir-981	522	509	0	13
group1_2244	mir-981b	mir-981	hme-mir-981	1.61e-09	dme-miR-981-3p	270	uucguugucgacgaaaccugca	cggguuucgggauaacggaac	cggguuucgggauaacggaaccgugauuaaaauugguucguugucgacgaaaccugca	mir-981	522	509	0	13
tig00001256_group27_39470	mir-novel87	mir-novel87				260	ugaagaaacauuggaugauugagau	gcucaauuuaaaauuauuuuugcgauuaaa	gcucaauuuaaaauuauuuuugcgauuaaaauuugaagaaacauuggaugauugagau	mir-BHRF1-2	519	518	0	1
group20_30707	mir-novel88a	mir-novel88				250	ucgcgaaaaguaagaucuggaguga	uacucccagaucacguacuugugugacu	ucgcgaaaaguaagaucuggagugagauguacucccagaucacguacuugugugacu	#N/A	503	495	0	8
group4_9481	mir-novel88b	mir-novel88				250	ucgcgaaaaguaagaucuggaguga	ucccagaucacguacuugugugaccc	ucgcgaaaaguaagaucuggagugagauguacucccagaucacguacuugugugaccc	#N/A	502	495	0	7
group19_29760	mir-novel89	mir-novel89				240	uuuagggaguuguuaggucaugu	acgcccuggcuuccucuaaauc	uuuagggaguuguuaggucauguuacuugcaguacacgcccuggcuuccucuaaauc	#N/A	490	362	0	128
group19_29827	mir-novel90	mir-novel90				230	uuuaggggucgauaguauaugu	ugguacuguccaccuccaaagu	uuuaggggucgauaguauauguuacuugcaguacugguacuguccaccuccaaagu	mir-101	463	374	0	89
group19_29813	mir-novel91	mir-novel91				220	uauuuauggaauuguggccuaug	uaggcgguuuuccauaaauag	uauuuauggaauuguggccuauguuacucguaguucauaggcgguuuuccauaaauag	#N/A	439	302	0	137
group11_16489	mir-novel92	mir-novel92	nta-MIR168e	0.006		210	acaaaucgugggcacuugcaau	agccaagugccgcgauuucguuga	agccaagugccgcgauuucguugauauuuuguaagucaacaaaucgugggcacuugcaau	mir-7	430	418	0	12
group23_31303	mir-novel93	mir-novel93				210	agaaaaucauguuccagcccc	ggcuguaacaugauuaaucuau	ggcuguaacaugauuaaucuaugagugugauaagucuauagaaaaucauguuccagcccc	#N/A	429	399	0	30
group19_29830	mir-novel94a	mir-novel94				210	uucuuuauggaaauagaggaug	ugaccuguuucuauaaagauau	uucuuuauggaaauagaggauguuacucgaaguacaugaccuguuucuauaaagauau	#N/A	412	311	0	101
tig00004208_group19_38947	mir-novel94b	mir-novel94				210	uucuuuauggaaauagaggaug	ugaccuguuucuauaaagauau	uucuuuauggaaauagaggauguuacucgaaguacaugaccuguuucuauaaagauau	#N/A	412	311	0	101
group19_29780	mir-novel94c	mir-novel94				210	uucuuuauggaaauagaggaug	ugaccuguuucuauaaagauau	uucuuuauggaaauagaggauguuacucgaaguacaugaccuguuucuauaaagauau	#N/A	412	311	0	101
group19_29790	mir-novel94d	mir-novel94				210	uucuuuauggaaauagaggaug	ugaccuguuucuauaaagauau	uucuuuauggaaauagaggauguuacucgaaguacaugaccuguuucuauaaagauau	#N/A	412	311	0	101
group19_29815	mir-novel94e	mir-novel94				210	uucuuuauggaaauagacgaug	ugguccguuucuauaaagauau	uucuuuauggaaauagacgauguuacucgaaguacaugguccguuucuauaaagauau	#N/A	411	379	0	32
group5_9768	mir-novel193	mir-novel193			dme-miR-927-5p	200	auuagaaucaguacgcuuugu	caaaacgaccugauucuucagu	auuagaaucaguacgcuuugucgucacuugcgcgcgaguucacaaaacgaccugauucuucagu	mir-224	403	386	0	17
group19_29845	mir-novel95	mir-novel95				200	aaaguccaaauuugacgauagc	caucgccggguuuggacucugu	caucgccggguuuggacucuguuucuaguaguacaacaaaguccaaauuugacgauagc	#N/A	409	147	0	262
group19_29826	mir-novel96	mir-novel96				200	uauuuauggaaucguggccuaug	uaggcgguuuuccauaaauag	uauuuauggaaucguggccuauguuacucguaguucauaggcgguuuuccauaaauag	#N/A	407	271	0	136
group27_34852	mir-novel97	mir-novel97				200	uaauucguuauacgcuauuguuugg	uugucgaagcaacugacgaauugg	uaauucguuauacgcuauuguuugggguguuuucuagaacgccgugauauuggcauucuuauacaccuguugucgaagcaacugacgaauugg	#N/A	404	395	4	5
group0_47	mir-novel98	mir-novel98				190	uuugauagaaacauugccuuua	cugauaauguuccuaaaaaauc	cugauaauguuccuaaaaaaucguguguuugauuugauagaaacauugccuuua	#N/A	397	380	0	17
group4_7409	mir-novel99	mir-novel99				190	gaggacaaugagaaagaug	aucuaucggguuguuggugcaaag	aucuaucggguuguuggugcaaagaucuacugauggaagcaguaugacuacggcuuagaggacaaugagaaagaug	#N/A	406	385	15	6
group27_37205	mir-novel100	mir-novel100				180	uauguuccugaagggaugugcugaa	uucuguagaccuuugagaacuuuaucc	uauguuccugaagggaugugcugaaaacgauaauaucaucuaaauaaacgagacauauuucauucuguagaccuuugagaacuuuaucc	#N/A	402	266	122	14
group27_37910	mir-novel101	mir-novel101				180	ucuugacagugauugcaacgcacca	uaugugugcaauacuuccugaa	uaugugugcaauacuuccugaacgugcccguauucuugacagugauugcaacgcacca	#N/A	374	364	0	10
group19_29771	mir-novel102	mir-novel102				180	uucuuuauggaaauugacgaug	ugguccguuucuauaaagauau	uucuuuauggaaauugacgauguuacucgaaguacaugguccguuucuauaaagauau	#N/A	357	325	0	32
group19_29834	mir-novel103	mir-novel103				170	ugguacuguccucugcuaaagu	uuuaggggucgauaguacaugu	uuuaggggucgauaguacauguuacuugcaguacugguacuguccucugcuaaagu	#N/A	348	300	0	48
group0_728	mir-novel104	mir-novel104				170	cuggcaaugccccgacaaccu	auugucggcgcaaugucagua	auugucggcgcaaugucaguaccgaacgguacuggcaaugccccgacaaccu	mir-33	342	314	0	28
group19_29820	mir-novel105	mir-novel105				170	uauuuauggaaucguggccuaug	uaggcggcuucccauaaauagc	uauuuauggaaucguggccuauguuacucguaguucauaggcggcuucccauaaauagc	#N/A	336	271	0	65
tig00003034_45934	mir-novel106	mir-novel106				170	ucucacagcaccacuguggcac	agcacaaacguguugugacaga	agcacaaacguguugugacagauuauucauuauaucucucacagcaccacuguggcac	#N/A	337	296	0	41
group19_29795	mir-novel107	mir-novel107				160	uauuuauggaaucgcggcuaug	uaggcgguuuuccauaaauag	uauuuauggaaucgcggcuauguuacucguaguucauaggcgguuuuccauaaauag	#N/A	332	196	0	136
group0_1167	mir-novel195-1	mir-novel195	mse-mir-316	1.26e-19	bmo-miR-3223-5p	160	gaccuuuucucuuugcuguuga	agcagcaaagcggaaaaagacaaa	gaccuuuucucuuugcuguugacauaaucauaauuaucagcagcaaagcggaaaaagacaaa	mir-14	324	304	0	20
group14_25085	mir-novel195-2	mir-novel195	mse-mir-316	1.26e-19	bmo-miR-3223-5p	160	gaccuuuucucuuugcuguuga	agcagcaaagcggaaaaagacaaa	gaccuuuucucuuugcuguugacauaaucauaauuaucagcagcaaagcggaaaaagacaaa	mir-14	324	304	0	20
group1_2370	mir-210	mir-210	mse-mir-210	2.2e-27	dme-miR-210-3p	160	cuugugcgugugacagcggcuau	agcugcuggccacugcacaagau	agcugcuggccacugcacaagauuaguuuaaucuauacucuugugcgugugacagcggcuau	mir-210	320	296	0	24
group27_34948	mir-novel108	mir-novel108				160	uaguucguuucuauggauaagcuua	uggcuaucuauacauguacuuauau	uaguucguuucuauggauaagcuuaaugaguauggcuaucuauacauguacuuauau	mir-10	373	372	0	1
tig00003034_45922	mir-novel109	mir-novel109	gra-MIR8762a	0.006		160	acagacaauaauagcauuaacaa	uguuguguuauauuguuuuuua	uguuguguuauauuguuuuuuaauauuuuucaaauugacagacaauaauagcauuaacaa	#N/A	324	321	0	3
group0_61	mir-novel110	mir-novel110				150	cgacaaucuacugaggacuuug	acgugcucaauagacugguagu	acgugcucaauagacugguaguguuucauaagucaccgacaaucuacugaggacuuug	#N/A	312	154	0	158
tig00003865_48373	mir-novel111	mir-novel111				140	uaucgauaucuucggguguuaauuu	uacggaugccuggacgguacucua	uaucgauaucuucggguguuaauuugguguuauggcucagugcaucuacaugagccauacggaugccuggacgguacucua	#N/A	301	300	0	1
group6_11510	mir-novel112	mir-novel112				140	aacaacuucagccgucucaaag	cugauccggcugaagcugguca	aacaacuucagccgucucaaaguacauaaaacucugauccggcugaagcugguca	mir-875	291	202	0	89
group20_30617	mir-novel113	mir-novel113				130	aauguaugaucuugacuuaauu	auaugucaauuucauacauuug	aauguaugaucuugacuuaauuugucaugugacuuagauaugucaauuucauacauuug	#N/A	277	215	0	62
group24_31740	mir-novel114	mir-novel114				130	uucuuggcuggccuacgacacuuua	uauguuuagucgccguggaacgagu	uucuuggcuggccuacgacacuuuaaaccagcugcacguaagugguuucguacaguuugcagcgucacauuauguuuagucgccguggaacgagu	#N/A	280	155	81	44
group0_301	mir-novel115	mir-novel115			hsa-miR-3607-5p	130	ucaugugacucuggauaggaacau	acccuaccaaagccgaugugugcac	acccuaccaaagccgaugugugcacaucaaaguugugcucaugugacucuggauaggaacau	mir-26	271	168	0	103
tig00003034_45928	mir-novel116	mir-novel116				130	ugguguugagacguucaccaaa	ugguuuucgaaucaaccccgga	ugguuuucgaaucaaccccggauuguuauuaaucucugguguugagacguucaccaaa	#N/A	260	233	0	27
group0_621	mir-novel117	mir-novel117				130	gacuguauaccuagcuacaccu	uguguacggcuacguauacaga	uguguacggcuacguauacagacauguaagugucuagaaugacuguauaccuagcuacaccu	#N/A	259	189	0	70
group16_26797	mir-285	mir-285	mse-mir-285	1.14e-16	dme-miR-285-3p	130	uagcaccauucgaauucagugc	acugcauucgaguguguggauaga	acugcauucgaguguguggauagaguuuuauauucucuagcaccauucgaauucagugc	mir-29	251	245	0	6
group14_24415	mir-novel118a	mir-novel118				130	uaguugauauuugguggaauugguu	uauuuccgcaucgucgucuauaugaaa	uauuuccgcaucgucgucuauaugaaacacguaguugauauuugguggaauugguu	#N/A	280	275	0	5
group8_13293	mir-novel118b	mir-novel118				130	uaguugauauuugguggaauugguu	uauuuccgcaucgucgucuauaugaaa	uauuuccgcaucgucgucuauaugaaacacguaguugauauuugguggaauugguu	#N/A	280	275	0	5
tig00003740_47706	mir-novel119a	mir-novel119				120	ucaguuuguuuggcucgcuggggaa	ucacagcacgcugcaaggaacgcauuc	ucacagcacgcugcaaggaacgcauucucaguuuguuuggcucgcuggggaa	#N/A	253	250	0	3
tig00003740_47694	mir-novel119b	mir-novel119				120	ucaguuuguuuggcucgcuggggaa	ucacagcacgcugcaaggaacgcauuc	ucacagcacgcugcaaggaacgcauucucaguuuguuuggcucgcuggggaa	#N/A	253	250	0	3
tig00003740_47724	mir-novel119c	mir-novel119				120	ucaguuuguuuggcucgcuggggaa	ucacagcacgcugcaaggaacgcauuc	ucacagcacgcugcaaggaacgcauucucaguuuguuuggcucgcuggggaa	#N/A	253	250	0	3
tig00004086_48899	mir-novel120	mir-novel120				120	ucaucccacacaggacguaacu	ucauguccugugagggguggag	ucaucccacacaggacguaacuugucuuugaucucaggagucauguccugugagggguggag	mir-1662	240	209	0	31
group9_14104	mir-novel121a	mir-novel121				100	aacaucaagauuugcaugucggaga	ccuauucugaggcagcaaaacuauuc	aacaucaagauuugcaugucggagaaaaauaucuccuauucugaggcagcaaaacuauuc	#N/A	219	212	0	7
group16_27283	mir-novel121b	mir-novel121				100	aacaucaagauuugcaugucggaga	ccuauucugaggcagcaaaacuauuc	aacaucaagauuugcaugucggagaaaaauaucuccuauucugaggcagcaaaacuauuc	#N/A	219	212	0	7
group19_28740	mir-novel121c	mir-novel121				100	aacaucaagauuugcaugucggaga	ccuauucugaggcagcaaaacuauuc	aacaucaagauuugcaugucggagaaaaauaucuccuauucugaggcagcaaaacuauuc	#N/A	219	212	0	7
group14_24344	mir-novel121d	mir-novel121				100	aacaucaagauuugcaugucggaga	ccuauucugaggcagcaaaacuauuc	aacaucaagauuugcaugucggagaaaaauaucuccuauucugaggcagcaaaacuauuc	#N/A	219	212	0	7
tig00002307_45168	mir-novel121e	mir-novel121				100	aacaucaagauuugcaugucggaga	ccuauucugaggcagcaaaacuauuc	aacaucaagauuugcaugucggagaaaaacaucuccuauucugaggcagcaaaacuauuc	#N/A	216	209	0	7
group3_7048	mir-novel122	mir-novel122				100	ucaaagucgaacaugacagauuaag	uuguaaugucauugucagcgcacacu	uuguaaugucauugucagcgcacacuuaaugucaaagucgaacaugacagauuaag	mir-374	258	252	0	6
group19_29841	mir-novel123	mir-novel123				100	uauuuuuuguauuaucaucacu	uaaugauuauacaaaaaaaaac	uauuuuuuguauuaucaucacuguuuccguagucaguaaugauuauacaaaaaaaaac	mir-231	200	181	0	19
group11_16503	mir-novel124	mir-novel124				100	uuguauuguaauggaauuuguuc	auaaauucaauuacccuacaau	auaaauucaauuacccuacaauauuauauuugauauuguauuguaauggaauuuguuc	mir-374	201	196	0	5
group19_28752	mir-novel125	mir-novel125				99	cauccaaaaacucaaagguuuua	auccaacuuugaguuuuuagauc	cauccaaaaacucaaagguuuuaaauuauuauccaacuuugaguuuuuagauc	mir-30	199	195	0	4
group25_32919	mir-2796	mir-2796	hme-mir-2796	7.39e-21	bmo-miR-2796-3p	92	guaggccggcggaaacuacuugc	agggguuucuuucggccuucag	agggguuucuuucggccuucagcuguuuaaagacuguaggccggcggaaacuacuugc	mir-21	173	154	0	19
group25_34155	mir-1000b	mir-1000	aga-mir-1000	1.06e-07		90	cgcuugucccgacccagcagua	cugcugugacaggacaauaugg	cgcuugucccgacccagcaguaacuguaggcaacacguacugcugugacaggacaauaugg	mir-554	176	105	0	71
group8_13715	mir-novel126a	mir-novel126				90	guaggauuggccaggcuguggcc	ccuggucuggcugauuccacgg	ccuggucuggcugauuccacgguugguaucguuggcuucgguaggauuggccaggcuguggcc	mir-1306	175	63	0	112
tig00000732_41221	mir-novel126b	mir-novel126				87	guaggauuggccaggcuguggcc	ccuggucuggcugauuccacgg	ccuggucuggcugauuccacgguugguaucguuggcuucgcguaggauuggccaggcuguggcc	#N/A	170	58	0	112
tig00003034_45919	mir-novel127	mir-novel127				84	uugguguauuauuaaagugauu	ucuacaauaauaauccauccaaa	uugguguauuauuaaagugauuuuagacucacuaguaaaaucuacaauaauaauccauccaaa	mir-23	168	135	1	32
group3_6775	mir-1b	mir-1	mse-mir-1a	4.92e-25	bmo-miR-1b-3p	82	ugggaaguaaggaagcacggaa	cauacuucuuuacauuccaua	cauacuucuuuacauuccauacgauuauaagcacuaugggaaguaaggaagcacggaa	mir-1	154	141	0	13
group19_29809	mir-novel128	mir-novel128				81	uaauuauggaaucguggccuaugu	uagacggcuuuccauaaaaaca	uaauuauggaaucguggccuauguuacucguaguacauagacggcuuuccauaaaaaca	#N/A	159	119	0	40
group0_490	mir-novel129	mir-novel129				78	ucggccaccggugaccuacgga	ugucggucaucggugacacacg	ucggccaccggugaccuacggacugaacauaaauucuuugucggucaucggugacacacg	#N/A	153	81	0	72
group1_1553	mir-novel130a	mir-novel130				76	uaagauuguaguuucaau	uugagacuuagaucgaaaa	uugagacuuagaucgaaaaaaauacuuucuuaagauuguaguuucaau	#N/A	169	167	0	2
tig00001135_41885	mir-novel130b	mir-novel130				76	uaagauuguaguuucaau	uugagacuuagaucgaaaa	uugagacuuagaucgaaaaaaauacuuucuuaagauuguaguuucaau	#N/A	169	167	0	2
group1_2097	mir-novel131a	mir-novel131			hsa-miR-656-3p	73	uauauuauucguuugacuaugu	auugucaaucgaauaaugaaaa	uauauuauucguuugacuauguguaucggcuauaucaacauugucaaucgaauaaugaaaa	#N/A	141	130	0	11
tig00004092_48909	mir-novel131b	mir-novel131			hsa-miR-656-3p	72	uauauuauucguuugacuaugu	auugucaaucgaauaaugaaaa	uauauuauucguuugacuauguguaucggcuauauaaacauugucaaucgaauaaugaaaa	mir-137	141	130	0	11
tig00003034_45937	mir-novel132	mir-novel132			hsa-miR-574-3p	70	uacgcucaacguauaagucuuaug	uagugcuuaccguugcgcuaua	uacgcucaacguauaagucuuaugguguuuuaauugaaccuucauagugcuuaccguugcgcuaua	#N/A	132	109	0	23
group14_24560	mir-novel133	mir-novel133				70	acagucuacccgcucaggccg	cccugcacaggcaggccgucc	acagucuacccgcucaggccguccugcucauugucgcccugcacaggcaggccgucc	#N/A	145	139	0	6
group27_37113	mir-novel134	mir-novel134				69	uucagacauaaauucaaguggguuc	ucuuucugugaaauuaugucagugua	uucagacauaaauucaaguggguucgagucauuacucccagucauuauaaugacgugaucuuucugugaaauuaugucagugua	#N/A	148	122	0	26
group2_2696	mir-novel135	mir-novel135			tca-miR-9d-5p	65	auuuggugauuuagcuuauga	auaaagcuauuucacuaaaugg	auuuggugauuuagcuuaugauguaauuauuuuuaucauaaagcuauuucacuaaaugg	mir-9	122	110	0	12
group15_26215	mir-8498	mir-8498	pxy-mir-8498	7.12e-18		65	guggggcaaauugcgaaagcug	gcuuucgcaauuugccgcacccg	gcuuucgcaauuugccgcacccguaaguugaucuggguggggcaaauugcgaaagcug	mir-BHRF1-2	126	117	0	9
group27_35152	mir-novel136a	mir-novel136				64	uucuaugauuuuauugauggaguga	uucuggagguugaaaucugucaaga	uucuaugauuuuauugauggagugaagguggucgguuguggagaggccacgacgaaagccggcuuguucuggagguugaaaucugucaaga	mir-338	136	128	1	7
group27_36763	mir-novel136b	mir-novel136				64	uucuaugauuuuauugauggaguga	uucuggagguugaaaucugucaaga	uucuaugauuuuauugauggagugaagguggucgguuguggagaggccacgacgaaagccggcuuguucuggagguugaaaucugucaaga	mir-338	136	128	1	7
group8_13562	mir-novel137	mir-novel137				64	caagaaucgcgaaaaaugaggag	ccuaauauuuggcgauacuuaug	ccuaauauuuggcgauacuuauguaaguuuaucaccacaagaaucgcgaaaaaugaggag	mir-576	143	141	0	2
group0_65	mir-novel138	mir-novel138				62	cgagcacggcacaggcgggcuca	gaccgccugugccguccucgca	gaccgccugugccguccucgcacgugggcauuaguauacgagcacggcacaggcgggcuca	mir-214	119	101	0	18
group20_30473	mir-novel139a	mir-novel139				58	uggcaugcuuuugauuaacuuuc	aaguggucaauagcucgccuuuag	aaguggucaauagcucgccuuuaguagacaucagaucuaauggcaugcuuuugauuaacuuuc	#N/A	114	109	0	5
group20_30475	mir-novel139b	mir-novel139				58	uggcaugcuuuugauuaacuuuc	aaguggucaauagcucgccuuuag	aaguggucaauagcucgccuuuaguagacaucagaucuaauggcaugcuuuugauuaacuuuc	#N/A	114	109	0	5
group4_7287	mir-novel140	mir-novel140				57	aaugaauacagcaaugaacaga	ccguuuauggcuguaugcguu	ccguuuauggcuguaugcguuucgauuuaauauuucacacucaaugaauacagcaaugaacaga	mir-460	118	111	0	7
group8_13795	mir-novel141	mir-novel141				56	cgcaccaagcgaucugucgcg	acauauugcuugguguagugg	cgcaccaagcgaucugucgcguuguacuguccgucgacauauugcuugguguagugg	#N/A	108	95	0	13
group1_1525	mir-novel142	mir-novel142				54	uucuaaaacuuguaauagaugga	cuucuauugaaguuuugaggua	cuucuauugaaguuuugagguacguguagcgauauucuaaaacuuguaauagaugga	#N/A	109	107	0	2
tig00001587_group15_38593	mir-novel143	mir-novel143			dme-miR-6-1-5p	52	ugggaauaacgucaauaucuuga	aaggugauuggaguuggcccaca	ugggaauaacgucaauaucuugauuaaauaugcucucaaggugauuggaguuggcccaca	#N/A	98	96	0	2
group4_7899	mir-novel144	mir-novel144				52	aaauaugugcguuggaagccg	cgcucccaacgcauauagcaa	cgcucccaacgcauauagcaaacaaccgacgcuaguggugucaguuauuagucucuguaaauaaaaaaauaugugcguuggaagccg	#N/A	111	104	0	7
group15_25644	mir-novel145	mir-novel145			dme-miR-6-1-5p	49	ugggaauaacgucaauaucuuga	aaggugauuggaguuggcccaca	ugggaauaacgucaauaucuugauuaaauaugcucucaaggugauuggaguuggcccaca	#N/A	98	96	0	2
group1_2240	mir-novel146	mir-novel146				48	aaggucagaaucgauuuaaaccu	guuugaaucuuuuugaccuuuu	guuugaaucuuuuugaccuuuucuuacucauuguaaaaggucagaaucgauuuaaaccu	#N/A	95	86	0	9
group20_30472	mir-novel147	mir-novel147				42	uuuaccaugugaacuguuuuaag	uaauacagucuauauggugauau	uuuaccaugugaacuguuuuaaguguuuauuuucaucuuaauacagucuauauggugauau	mir-21	82	71	0	11
group11_16483	mir-novel148	mir-novel148				35	ugucaaaaguucuucgcgaggu	cucgugaaccacuucuggcccu	cucgugaaccacuucuggcccuucgucgagugucaaaaguucuucgcgaggu	mir-BHRF1-1	76	67	0	9
group20_30469	mir-novel149	mir-novel149	ptc-MIR399e	0.006		34	uucgaucucugugagacacgucu	acuggcucacgagaauccaaucu	acuggcucacgagaauccaaucuaguauucaguuagauucgaucucugugagacacgucu	#N/A	67	56	0	11
group8_13115	mir-275-1	mir-275	bmo-mir-275	9.06e-08	dme-miR-275-3p	5.9	ucagguaccugaaguagcgcg	cgcguuacucaggcgccgggcu	cgcguuacucaggcgccgggcugugcgcucgagucagguaccugaaguagcgcg	mir-275	79940	79844	0	96
group1_1486	mir-31	mir-31	mse-mir-31	1.84e-18	dme-miR-31b-5p	5.6	aggcaagaagucggcauagcugu	ggcugugucacuucgagccag	aggcaagaagucggcauagcuguuugauguugguauacggcugugucacuucgagccag	mir-31	523307	523289	0	18
tig00001826_42952	mir-929a	mir-929	aae-mir-929-1	0.000361	dme-miR-929-5p	5.3	uaauugacuuuaguagggagucu	acucccuacggagucaauuggg	acucccuacggagucaauugggccgaacgguccuaauugacuuuaguagggagucu	mir-929	1318	1318	0	0
tig00002114_44088	mir-929b	mir-929	aae-mir-929-1	0.000387	dme-miR-929-5p	5.2	uaauugacuuuaguagggagucu	acucccacuggagucaguuggg	acucccacuggagucaguugggccgugcagagguccuaauugacuuuaguagggagucu	mir-83	1318	1318	0	0
group10_15143	let-7	let-7	hme-let-7	1.32e-16	dme-let-7-5p	5	ugagguaguagguuguauag	cuguacguccuacuaacuuucc	ugagguaguagguuguauaguacuguauuacaacauuugggugacacuguacguccuacuaacuuucc	mir-290	1130464	1085732	106	44626
group12_22732	mir-184	mir-184	hme-mir-184	2.59e-14	dme-miR-184-3p	4.9	uggacggagaacugauaagg	ccuugucauucuucuugcccgu	ccuugucauucuucuugcccgugugcuuaagacuacuggacggagaacugauaagg	mir-184	598516	597580	0	936
tig00000260_40966	mir-iab-4-1	mir-iab-4	mse-mir-iab-4	8.05e-21	dme-miR-iab-4-5p	4.9	acguauacugaauguauccuga	uauaccuucaguauacguaaca	acguauacugaauguauccugagugccucauucuuuccgguauaccuucaguauacguaaca	mir-iab-4	26445	26370	0	75
group12_19797	mir-2768	mir-2768	bmo-mir-2768	1.63e-10	bmo-miR-2768-3p	4.8	auugguuaagauauugcaucgu	ucggugaaauauuuugaccaauu	ucggugaaauauuuugaccaauuuuauauauaugagguucuaugcucgguugaguaaaaacugaauugguuaagauauugcaucgu	#N/A	7679	7629	0	50
group7_12841	mir-iab-4-2	mir-iab-4	mse-mir-iab-4	1.16e-16	dme-miR-iab-4-5p	4.6	acguauacugaauguauccuga	uaccuucaguauaacgua	acguauacugaauguauccugagugccucauucuuuccgguauaccuucaguauaacgua	mir-iab-4	26371	26370	0	1
group8_13576	mir-3338	mir-3338	mse-mir-3338	1.95e-21	bmo-miR-3338-3p	4.4	auguacuuacuuuguuuguucu	caaacacaguagugugcaaugcu	caaacacaguagugugcaaugcuaaaguuauaccaugcauguacuuacuuuguuuguucu	#N/A	197051	196912	0	139
group1_1987	mir-7	mir-7	bmo-mir-7	1.09e-13	dme-miR-7-5p	3.7	uggaagacuagugauuuuguug	caagaaaucacuaaucucccua	uggaagacuagugauuuuguuguuuugauuugaguaacaagaaaucacuaaucucccua	mir-7	94912	94563	0	349
group12_19786	mir-190-1	mir-190	mse-mir-190	3.18e-20	dme-miR-190-5p	3.6	agauauguuugauauucuugg	ccaggaaucaaacauauuaccca	agauauguuugauauucuugguuguaucuuuuguaucacccaggaaucaaacauauuaccca	mir-190	91566	91527	0	39
group8_13116	mir-275-2	mir-275	mse-mir-275	8.11e-09	dme-miR-275-3p	1.6	ucagguaccugaaguagcgcg	cgccagcacaggagccccgcc	ucagguaccugaaguagcgcgcgccgcugccgccgccgccgccgccagccgcgccagcacaggagccccgcc	mir-275	79845	79844	1	0
group12_19785	mir-190-2	mir-190	tur-mir-190	4.75e-07	dme-miR-190-5p	1.6	agauauguuugauauucuugg	aaaaauauaugggagacaa	aaaaauauaugggagacaaagacagcugauaaugccguuguaucguugagauauguuugauauucuugg	mir-190	91529	91527	1	1
group10_15096	mir-317	mir-317	mse-mir-317	1.27e-25	dme-miR-317-3p	1.4	ugaacacagcuggugguaucu	gggugccacgcugugcucucu	gggugccacgcugugcucucucggguauuagugcggagugaacacagcuggugguaucu	mir-317	305706	305629	8	69
group0_103	mir-3392	mir-3392	bmo-mir-3392	6.87e-06		0.8	ccgcggcuccauuaccaucgcuuu	auuaacgccgaaggucgugg	auuaacgccgaaggucguggguucgauccccgcaugggccaccgcggcuccauuaccaucgcuuu	mir-367	312	265	45	2

## Sheet: B. Endogenous siRNAs
	Species	Tissue/cell type	Endogenous siRNAs	Transposon siRNAs			Non-transposon siRNAs
				Total	% total siRNAs	Hairpin siRNAs	Total	% total siRNAs	Hairpin siRNAs	% of non-transposon siRNA	cis-NAT siRNAs	% non-transposon siRNA
	Trichoplusia ni	Hi5	912841	310761	0.34	23692.7	602080	0.66	25750	0.0428	147905	0.246
		Ovary	313121	163940	0.524	4085.26	149181	0.476	1852.34	0.0124	17597.2	0.118
		Testis	340933	145081	0.426	14648.3	195852	0.574	9037.56	0.0461	29663.4	0.151
		Female thorax	563333	125809	0.223	12724.2	437524	0.777	3412.53	0.0078	138044	0.316
		Male thorax	736512	152746	0.207	12393.1	583766	0.793	6186.64	0.0106	94731.5	0.162
	Fruit fly	Fly heads *	247377	129777	0.525	18809	117600	0.475	50104.5	0.426	65683.6	0.559
		* Data from GSE18806

## Sheet: C. piRNA cluster lengths
	Number of tissues	Intersection of piRNA clusters	piRNA cluster length (kb)
	5	Hi5 ∩ ovary ∩ testis ∩ female thorax ∩ male thorax	1441.97
	4	Ovary ∩ testis ∩ female thorax ∩ male thorax	264.681
		Hi5 ∩ ovary ∩ testis ∩ male thorax	103.904
		Hi5 ∩ ovary ∩ testis ∩ female thorax	80.228
		Hi5 ∩ testis ∩ female thorax ∩ male thorax	19.092
		Hi5 ∩ ovary ∩ female thorax ∩ male thorax	2.39
	3	Hi5 ∩ ovary ∩ testis	197.499
		Ovary ∩ testis ∩ male thorax	94.912
		Hi5 ∩ ovary ∩ female thorax	62.23
		Ovary ∩ testis ∩ female thorax	52.096
		Testis ∩ female thorax ∩ male thorax	36.117
		Ovary ∩ female thorax ∩ male thorax	5.661
		Hi5 ∩ testis ∩ female thorax	2.871
		Hi5 ∩ ovary ∩ male thorax	1.445
		Hi5 ∩ female thorax ∩ male thorax	0.528
		Hi5 ∩ testis ∩ male thorax	0.002
	2	Ovary ∩ testis	376.188
		Hi5 ∩ testis	156.341
		Hi5 ∩ ovary	139.912
		Female thorax ∩ male thorax	74.527
		Ovary ∩ male thorax	28.222
		Testis ∩ male thorax	12.992
		Hi5 ∩ female thorax	10.575
		Hi5 ∩ male thorax	5.757
		Ovary ∩ female thorax	4.809
		Testis ∩ female thorax	3.097
	1	Ovary	7816.56
		Hi5	756.996
		Testis	250.02
		Female thorax	52.853
		Male thorax	39.89

## Sheet: D. Hi5 piRNA clusters
	Chromosome	Start	End	Cluster name	Strand	RPM on plus strand (apportioned reads)	RPM on minus strand (apportioned reads)	RPM on plus strand (uniquely mapped reads)	RPM on minus strand (uniquely mapped reads)
	group12	11165198	11421829	cluster1	+	23845.9	15855.8	8329.41	7467.72
	group12	2255000	2467632	cluster2	-	18680.6	22562.3	2736.28	8337.54
	group2	9172226	9350644	cluster3	+	9677.1	11312.6	3669.1	5523.9
	group12	7638980	7808200	cluster4	-	9144.12	18339.1	2837.14	8640.55
	group2	9479987	9645729	cluster5	+	22206	9780.13	7286.85	1814.33
	group4	7619032	7776507	cluster6	-	12412.7	37207.3	1751.57	18550.9
	group19	4140000	4285000	cluster7	-	1525.06	6748.51	1401.14	6398.34
	group11	2125800	2245678	cluster8	+	17035.2	3266.94	7671.56	41.7714
	group3	17750000	17860000	cluster9	+	1719.7	30.4929	1698.89	21.6478
	group15	4622484	4725589	cluster10	+	16267.3	422.879	5684.21	2.07642
	group25	4815888	4890000	cluster11	+	12824.2	3800.96	2917.77	62.0718
	group25	4361527	4434985	cluster12	+	12047.1	2028.98	3308.6	4.59464
	group11	2379461	2450072	cluster13	-	863.67	7255.15	50.3864	684.093
	group21	501959	567499	cluster14	-	785.787	961.538	784.623	959.904
	tig00001362	2238	63739	cluster15	+	7591.27	824.159	2861.49	17.252
	group11	35000	91881	cluster16	-	107.46	8608.23	0.662688	1872.96
	tig00003514	0	55221	cluster17	-	101.327	9726.34	3.07045	7112.14
	tig00003749	0	52594	cluster18	-	7559.22	2806.82	3554.72	814.377
	tig00002967	225000	270000	cluster19	+	1068.8	0.608544	920.695	0.419702
	group19	4060000	4095000	cluster20	-	11.5159	762.21	6.56061	658.182
	group3	2495000	2530000	cluster21	-	0.418781	277.695	0.110448	271.194
	group4	8075000	8110000	cluster22	-	0.0312875	265.548	0	265.34
	tig00001119	0	34951	cluster23	-	726.021	3132.64	75.5023	900.107
	group19	3970000	4004940	cluster24	+	2184.82	162.247	1510.16	54.981
	tig00002235	0	32499	cluster25	-	206.252	1556.42	4.39583	1116.81
	group11	355000	380000	cluster26	-	302.599	20.8033	300.684	0.287165
	group20	1929424	1951439	cluster27	+	4666.07	2.79626	941.061	0.176717
	group19	3725000	3745000	cluster28	+	274.872	0.0662688	224.43	0.0662688
	group4	3965000	3985000	cluster29	+	856.447	612.127	2.25314	0
	tig00002317	0	20000	cluster30	-	7.70048	462.421	1.08239	416.963
	tig00001980	0	19412	cluster31	-	235.073	5417.56	0.0220896	697.059
	group8	8123587	8142899	cluster32	-	265.424	230.152	7.33375	3.1809
	tig00000210	2544	18463	cluster33	-	184.11	436.873	0.309254	0.949853
	tig00002997	0	15000	cluster34	+	3904.12	1447.48	0.176717	0.0220896
	group0	1242177	1256264	cluster35	+	3702.99	251.612	317.847	44.7756
	group26	695738	709541	cluster36	-	109.554	696.456	93.0635	1.36956
	group19	544162	557578	cluster37	+	381.333	902.071	344.134	894.828
	tig00002170	14760	27963	cluster38	-	2162.16	186.325	2161.51	185.31
	group25	1575410	1588552	cluster39	-	692.571	542.322	692.465	542.322
	group5	12151110	12163900	cluster40	+	1415.94	317.052	1415.94	317.052
	group17	7641995	7654734	cluster41	-	351.951	1234	269.78	0.640598
	group4	4316834	4329515	cluster42	-	68.3543	1061.61	2.29732	928.271
	group27	681335	693938	cluster43	-	347.668	188.608	332.669	5.36777
	group5	3908291	3920852	cluster44	+	3827.55	398.989	3822.85	391.759
	group19	2220715	2233225	cluster45	+	155.615	263.569	155.555	263.242
	group11	982679	994727	cluster46	-	336.787	20.7968	336.778	20.455
	tig00003176	10354	22353	cluster47	+	343.928	79.195	1.41373	0
	group12	9902787	9914642	cluster48	-	100.147	198.048	99.6462	197.481
	group11	2073649	2085494	cluster49	+	622.255	208.306	522.706	139.805
	group6	9678383	9689902	cluster50	-	259.111	2960.45	1.2812	2.84956
	group0	9475491	9486973	cluster51	+	90.0595	93.7284	0.110448	66.6443
	group3	4358949	4370260	cluster52	-	72.4546	150.193	72.2551	150.187
	group2	5355115	5366341	cluster53	-	0.423749	1012.8	0.176717	1010.73
	group1	7985806	7996950	cluster54	+	290.838	120.7	223.768	96.3769
	group26	2159975	2170919	cluster55	-	80.1892	382.813	73.2712	141.285
	group14	9676124	9686762	cluster56	-	129.272	0.390431	124.011	0.0441792
	group7	14801320	14811958	cluster57	+	66.4493	116.418	1.01612	84.559
	group16	2242806	2253443	cluster58	+	372.358	23.2681	95.2062	0
	group11	2484463	2495037	cluster59	-	34.7637	1076.33	0.242986	144.974
	group27	525141	535692	cluster60	+	399.183	170.374	0.0883584	1.7009
	group15	1830174	1840645	cluster61	+	1561.77	377.032	15.529	0.220896
	group14	1959863	1970304	cluster62	-	92.4174	62.1252	92.2462	61.9171
	group2	10698286	10708671	cluster63	-	239.875	2974.12	0.751046	23.1278
	tig00000059	22153	32467	cluster64	+	209.225	5.95757	87.1214	0.198806
	group8	8432112	8442408	cluster65	+	916.266	72.9118	36.492	8.21733
	group11	2321140	2331403	cluster66	-	90.075	710.402	11.6854	91.8044
	group14	1903657	1913844	cluster67	-	154.855	59.4073	138.811	58.427
	group19	4026963	4037127	cluster68	-	108.082	31.8132	97.8569	15.9266
	group6	5563948	5574043	cluster69	-	33.8543	842.851	6.78151	5.96419
	group23	2310501	2320562	cluster70	+	98.5269	18.6601	1.36956	0.0883584
	group1	13967477	13977525	cluster71	+	91.0677	58.4049	91.0533	58.4049

## Sheet: E. Ovary piRNA clusters
	Cluster name	Chromosome	Start	End	Strand	RPM on plus strand (apportioned reads)	RPM on minus strand (apportioned reads)	RPM on plus strand (uniquely mapped reads)	RPM on minus strand (uniquely mapped reads)	Dual-strand or uniq-strand
	cluster3	group12	11161090	11424951	+	26985.6	21126.2	44999.5	33248.1	dual-strand
	cluster2	group11	2125000	2495000	-	14905.8	27576.7	27910.8	29789.4	dual-strand
	cluster6	group2	9170046	9352813	+	14731.8	12854.3	26775.4	23206	dual-strand
	cluster8	group12	7639307	7806328	-	3147.97	17737.7	4290.51	33433.9	uni-strand
	cluster9	group4	7618776	7775000	-	3346.47	18985.1	1592.19	35755.7	uni-strand
	cluster1	group27	399308	861302	+	8675.7	7700.73	14152.1	12047.3	dual-strand
	cluster23	group19	2128105	2205000	-	2007.62	9905.2	219.788	21617.8	uni-strand
	cluster5	group12	2258001	2466090	-	6678.38	11534.6	4892.72	16839.6	uni-strand
	cluster32	tig00003514	0	56246	-	93.7425	9765.21	82.7683	18100.4	uni-strand
	cluster28	group25	4371173	4434985	+	8629.81	548.707	17226.5	378.949	uni-strand
	cluster37	tig00003749	0	51862	-	2955.17	4585.52	6770.54	9940.2	dual-strand
	cluster194	group23	3618385	3633599	+	4659.29	36.9061	16099.6	127.398	uni-strand
	cluster12	group2	9476585	9616353	+	8336.93	2404.28	13142.9	2417.21	uni-strand
	cluster30	group11	30790	92032	-	1057.94	8855.62	213.065	14871.5	uni-strand
	cluster18	group15	4624962	4713356	+	9007.97	315.162	14300.3	464.499	uni-strand
	cluster4	group27	875555	1118102	+	4105.35	4020.17	6921.24	7141.84	dual-strand
	cluster27	tig00001362	0	64514	+	7153.96	282.92	11327.9	247.03	uni-strand
	cluster87	group19	7247972	7280000	+	2513.13	848.71	8144.45	1761.55	uni-strand
	cluster59	tig00001119	0	41214	-	976.062	4095.3	2314.15	7494.59	uni-strand
	cluster15	group27	207773	330000	+	3779.48	2238.09	7002.96	2584.83	uni-strand
	cluster11	group27	2395000	2537804	-	1534.98	4344.17	1666.96	6955.67	uni-strand
	cluster13	group24	41880	173145	+	3258.1	1607.28	7042.26	1579.79	uni-strand
	cluster14	group27	1418655	1545983	+	4076.28	2240.71	5602.97	2925.99	dual-strand
	cluster81	tig00002235	0	33933	-	196.529	4469.55	215.267	7433.15	uni-strand
	cluster73	tig00003157	2196	37649	+	2085.47	742.909	5970.33	1508.15	uni-strand
	cluster10	group27	1908152	2054507	-	2581.77	2849.52	3600.89	3756.8	dual-strand
	cluster64	tig00002274	2577	41164	+	2165.19	204.16	6589.47	346.259	uni-strand
	cluster39	group10	8054838	8105181	+	1853.53	768.572	4974.21	1781.26	uni-strand
	cluster44	group27	2677963	2725011	+	1340.94	832.39	4233.47	2348.46	dual-strand
	cluster223	group0	11902106	11915979	-	87.4873	1815.08	279.372	6042.67	uni-strand
	cluster45	group2	9621983	9668597	-	292.755	6026.77	128.094	5818.59	uni-strand
	cluster171	tig00002431	0	17063	+	2334.18	220.134	5852.44	52.2808	uni-strand
	cluster7	group5	10945526	11118195	-	2195.93	2441.37	2698.08	2832.9	dual-strand
	cluster50	group5	10733109	10778996	+	1383.27	1340.92	2005.45	3234.46	dual-strand
	cluster20	group27	1240000	1323514	-	1208.11	1661.07	2695.19	1822.41	dual-strand
	cluster129	tig00002317	0	23351	-	203.161	1525.7	382.195	4052.17	uni-strand
	cluster35	tig00003909	0	52725	+	1691.59	528.849	3366.61	925.521	uni-strand
	cluster17	group5	11165000	11265000	-	1574.17	1585.37	2159.4	2059.01	dual-strand
	cluster83_2	group27	2075085	2093917	+	1130.58	91.6498	3730.83	231.844	uni-strand
	cluster125	tig00003367	0	24389	+	1482.03	401.367	3093.73	787.922	uni-strand
	cluster16	group24	4817544	4923006	-	1328.87	1959.93	1414.83	2463.34	dual-strand
	cluster25	group27	1700196	1773602	+	1985.14	270.385	3544.78	313.105	uni-strand
	cluster152	tig00004217_group27	16628	36286	+	1091.58	85.9896	3570.98	251.087	uni-strand
	cluster53	group15	45194	90000	-	723.298	1054.75	1421.44	2345.1	dual-strand
	cluster19	group24	232500	316265	-	620.491	1848.5	464.036	3253.12	uni-strand
	cluster58	group27	1836755	1878105	+	966.448	875.64	1999.65	1692.46	dual-strand
	cluster126	tig00003305	9202	33510	+	825.797	563.262	1870.63	1609.58	dual-strand
	cluster22	group27	34185	112499	+	1623.16	989.797	1991.77	1469.66	dual-strand
	cluster82	tig00002170	0	33816	-	561.524	882.306	1561.7	1782.3	dual-strand
	cluster192	group24	4763032	4778251	+	1115.9	94.2949	2808.44	282.618	uni-strand
	cluster51	tig00002088	0	45055	-	614.08	1186.35	1441.37	1576.19	dual-strand
	cluster26	group27	2273673	2340000	-	1077.95	1633.03	1640.76	1251.73	dual-strand
	cluster31	tig00001430	2034	62296	-	911.038	1245.6	1575.15	1269.58	dual-strand
	cluster330	tig00002324	0	10074	+	849.709	52.0987	2709.56	130.528	uni-strand
	cluster43	tig00001411	8912	56089	+	1198.78	445.846	2293.63	543.558	uni-strand
	cluster67	tig00002251	0	37901	-	124.812	2300.92	169.478	2654.5	uni-strand
	cluster218	group4	15198810	15212952	+	823.56	156.067	2496.15	318.09	uni-strand
	cluster29	tig00003304	16932	80483	+	1209.16	689.716	2143.4	611.489	uni-strand
	cluster40	group25	4837841	4888017	+	4806.08	519.054	2563.73	178.984	uni-strand
	cluster33	group24	438266	491984	+	1214.34	445.253	2221.07	451.4	uni-strand
	cluster21	group24	4678800	4760000	-	441.126	4557.08	665.16	1929.06	uni-strand
	cluster91	tig00002039_group27	3809	35000	+	1033.58	369.835	1897.87	598.969	uni-strand
	cluster128	tig00002024_group24	25837	49221	+	957.41	192.217	2106.77	378.717	uni-strand
	cluster124_2	tig00001256_group27	12040	31265	-	60.1853	862.13	143.975	2328.76	uni-strand
	cluster24_1	group4	15213895	15274866	+	529.988	1067.62	513.882	1892.77	uni-strand
	cluster179	group25	1868479	1884987	-	343.166	363.617	1169.42	1220.66	dual-strand
	cluster141	tig00002214	0	21362	+	838.982	193.188	2078.83	289.921	uni-strand
	cluster88	tig00002197	0	31859	-	331.536	995.954	369.791	1989.57	uni-strand
	cluster55_1	tig00002083	14352	44796	+	187.875	733.01	253.174	2074.19	uni-strand
	cluster54	group19	4214691	4259390	-	73.7405	803.132	27.4735	2276.48	uni-strand
	cluster41	tig00003228_group27	0	50114	+	1214.89	713.768	1467.8	804.151	dual-strand
	cluster191	tig00002290_group27	10386	25649	+	675.198	150.546	2053.44	191.503	uni-strand
	cluster198	tig00001041_group24	0	15148	+	923.674	168.377	2027.01	182.809	uni-strand
	cluster71	tig00004238	0	35803	+	1390.21	319.731	1694.66	514.23	uni-strand
	cluster221	group15	4753845	4767731	-	41.5373	1077.14	44.8618	2106.07	uni-strand
	cluster78	tig00003280	0	35000	-	675.851	701.487	1360	788.617	dual-strand
	cluster38	tig00003563	0	50490	-	289.801	1324.94	429.259	1715.18	uni-strand
	cluster132	tig00002045	8381	31106	+	1102.34	148.732	1924.07	218.745	uni-strand
	cluster212	group20	6896995	6911489	+	544.691	125.478	1721.56	417.087	uni-strand
	cluster63	tig00002106_group27	2678	41529	+	870.314	592.423	1478.12	601.867	uni-strand
	cluster101	tig00003208	0	29372	+	639.12	367.135	1684.58	316.467	uni-strand
	cluster47	group27	2212028	2258487	-	399.169	1104.78	409.205	1571.09	uni-strand
	cluster60	tig00002160	1348	41952	+	614.344	526.189	1236.31	726.715	dual-strand
	cluster85	group27	2614120	2646860	+	756.013	255.18	1565.76	312.41	uni-strand
	cluster80	tig00002149	0	34851	+	606.951	412.374	1196.55	681.39	dual-strand
	cluster86	tig00000716	11285	43340	-	325.2	798.831	245.986	1595.09	uni-strand
	cluster149	tig00001980	0	20222	-	44.059	1503.18	29.792	1778.13	uni-strand
	cluster116	group5	10669216	10695322	+	608.948	575.412	830.465	964.935	dual-strand
	cluster48	tig00004101	0	46432	+	672.508	623.61	1058.25	726.251	dual-strand
	cluster115	tig00003566	25638	51749	+	519.205	355.326	1047.24	728.454	dual-strand
	cluster153	group0	20956659	20976055	-	92.7787	416.991	320.64	1442.77	uni-strand
	cluster107	tig00000620	0	28054	-	443.525	654.985	837.884	882.862	dual-strand
	cluster134	tig00004026	0	22505	-	360.298	522.24	876.834	824.785	dual-strand
	cluster100	tig00004249	4396	33832	+	925.459	327.119	1481.83	206.689	uni-strand
	cluster150	tig00002286	5000	25198	+	871.121	297.697	1300.07	348.693	uni-strand
	cluster139	tig00002420	0	21592	+	568.344	184.642	1352.81	287.371	uni-strand
	cluster65	tig00004078	5000	43436	-	499.196	772.411	785.487	853.302	dual-strand
	cluster213	tig00002056	15917	30395	-	105.094	568.903	79.6384	1532.95	uni-strand
	cluster301	tig00002348	0	10815	+	411.761	93.6782	1399.06	212.601	uni-strand
	cluster235	group9	9585058	9598347	+	550.931	40.5454	1512.2	72.9149	uni-strand
	cluster93	group6	16186709	16217499	-	121.382	731.274	263.143	1284.88	uni-strand
	cluster97	tig00000074	0	30000	+	676.752	468.538	864.662	662.958	dual-strand
	cluster196	tig00004045_group27	0	15160	+	598.62	53.0166	1388.75	135.397	uni-strand
	cluster70	group5	10874172	10910164	-	489.076	814.589	342.897	1179.74	uni-strand
	cluster114_2	tig00001859	20444	30622	+	470.555	35.4841	1478.59	31.9945	uni-strand
	cluster140	tig00001793_group25	0	21455	-	337.994	356.703	451.053	1052.57	uni-strand
	cluster96	tig00002407	0	30187	+	513.205	197.04	1243.73	236.365	uni-strand
	cluster135	tig00003974	4206	26673	-	87.2642	484.457	123.341	1351.53	uni-strand
	cluster84	tig00002126	4253	37572	+	1645.89	156.714	1323.83	149.771	uni-strand
	cluster169	group27	1889620	1906763	-	527.342	561.832	1316.64	132.383	uni-strand
	cluster158	tig00000192	1094	19145	+	731.211	36.546	1380.4	43.5867	uni-strand
	cluster49	group5	10815000	10861161	+	923.657	474.548	1083.52	330.494	uni-strand
	cluster168	tig00002234	4950	22113	+	411.172	192.434	828.958	584.711	dual-strand
	cluster75	group24	0	35000	-	274.891	499.538	387.411	995.77	uni-strand
	cluster173	tig00003955	14191	31142	+	442.711	105.365	1224.37	154.524	uni-strand
	cluster143	tig00004243	0	21088	+	694.53	403.966	623.66	753.029	dual-strand
	cluster68	tig00002105	5323	42556	-	197.762	802.824	274.503	1094.65	uni-strand
	cluster46	tig00003945	19718	66296	-	595.923	639.961	1174.17	193.358	uni-strand
	cluster281	tig00002026_group27	7252	18849	+	449.524	252.654	1229.58	124.964	uni-strand
	cluster36	group27	2150000	2202499	+	683.827	384.762	890.629	460.442	dual-strand
	cluster172	group20	1931865	1948848	+	3796.66	0.614736	1347.25	0.463688	uni-strand
	cluster66	group24	321825	360000	+	522.756	248.496	1060.45	245.291	uni-strand
	cluster127	group27	1212504	1236370	-	259.485	617.393	230.685	1047.82	uni-strand
	cluster102	tig00004140	5872	35000	-	197.316	708.304	378.485	894.338	uni-strand
	cluster211	tig00002258	700	15460	+	349.283	81.5718	1099.87	150.93	uni-strand
	cluster217	tig00004263_group27	0	14239	-	60.4023	533.944	113.951	1133.83	uni-strand
	cluster108	tig00003158	2553	30150	+	522.247	54.805	1159.92	77.6677	uni-strand
	cluster55_2	tig00002083	44796	58797	-	434.601	150.732	902.916	303.252	uni-strand
	cluster56	tig00001872	0	44209	-	545.933	758.251	158.349	1047.82	uni-strand
	cluster242	tig00001384	4049	17148	+	227.856	191.632	639.31	561.642	dual-strand
	cluster264	tig00002323	4684	16940	+	470.039	74.6466	1114.71	70.1328	uni-strand
	cluster279	group24	380553	392197	-	67.4206	476.199	88.1007	1076.57	uni-strand
	cluster226	group20	6241974	6255814	-	37.1992	320.525	106.3	1057.44	uni-strand
	cluster245	group15	5462554	5475480	-	24.952	314.342	75.5811	1045.62	uni-strand
	cluster61	group24	4630000	4670430	-	530.517	589.867	502.87	614.271	dual-strand
	cluster261	tig00002416_group7	0	12467	+	428.002	80.0975	1033.79	74.0742	uni-strand
	cluster193	tig00001444_group27	0	15215	-	88.1258	439.207	92.158	1011.54	uni-strand
	cluster156_2	tig00003889	10234	21945	-	81.8113	307.36	156.611	941.634	uni-strand
	cluster246	tig00002252	961	13883	+	326.794	114.839	888.426	208.08	uni-strand
	cluster_79_2	tig00004125	20901	41892	-	99.3066	972.23	71.1761	1019.42	uni-strand
	cluster133_2	tig00002369	16834	22599	-	42.0984	304.424	75.1175	1014.67	uni-strand
	cluster263	tig00002121_group27	4202	16497	-	125.772	452.847	258.97	827.799	uni-strand
	cluster154	tig00002305	3349	22722	-	256.446	339.461	469.02	616.473	dual-strand
	cluster148	tig00001386_group24	20779	41014	+	370.109	217.012	436.214	645.338	dual-strand
	cluster89_1	tig00002013	8627	35674	+	381.961	227.735	585.406	496.03	dual-strand
	cluster216	tig00004080	0	14280	-	43.0621	446.932	44.7459	1036.34	uni-strand
	cluster180	tig00003670	0	16460	+	424.23	37.0763	974.208	98.9974	uni-strand
	cluster238	group24	186116	199276	-	51.2364	522.223	90.5351	944.648	uni-strand
	cluster144	tig00002121_group27	27295	48332	+	575.962	92.966	898.048	133.078	uni-strand
	cluster99	tig00001166	1447	30978	-	493.997	795.769	250.971	769.027	uni-strand
	cluster274	tig00001221_group24	0	11839	+	374.906	58.7931	918.45	67.4666	uni-strand
	cluster92	tig00004268	322	31133	-	534.396	557.279	538.805	445.025	dual-strand
	cluster259	group9	14119169	14131659	-	28.3506	394.074	51.7012	931.897	uni-strand
	cluster204	tig00002210	0	15000	-	96.3172	369.814	239.147	740.394	uni-strand
	cluster209	group27	1787045	1801959	-	360.09	501.638	521.417	446.416	dual-strand
	cluster142	tig00004230	0	21140	-	79.652	1757.08	130.992	829.77	uni-strand
	cluster190	tig00002330	7460	22776	+	463.738	107.733	835.798	121.834	uni-strand
	cluster113	tig00003976_group24	0	26675	+	678.015	223.202	594.796	355.185	dual-strand
	cluster183	tig00002178	13911	30000	+	191.536	138.011	539.037	406.307	dual-strand
	cluster275	group0	15592161	15603992	-	182.686	305.093	335.942	589.927	dual-strand
	cluster231	group20	5725219	5738707	-	134.701	201.448	304.527	601.867	dual-strand
	cluster133_1	tig00002369	0	16834	+	805.025	70.1625	846.347	54.8311	uni-strand
	cluster110	tig00001947	0	27499	+	278.653	257.258	726.483	149.771	uni-strand
	cluster147_2	tig00004209_group27	23476	31670	-	21.9527	232.101	74.0742	796.848	uni-strand
	cluster114_1	tig00001859	4364	19820	-	181.038	1119.31	173.419	696.923	uni-strand
	cluster112	group27	2890230	2917413	-	65.4405	576.213	48.9191	784.56	uni-strand
	cluster124_1	tig00001256_group27	6570	12040	+	289.347	93.0638	526.981	304.991	dual-strand
	cluster267	group27	2852681	2864849	+	237.757	22.4088	757.55	67.3507	uni-strand
	cluster119	tig00004145	0	25381	-	424.772	438.333	504.377	313.337	dual-strand
	cluster229	group20	112585	126338	-	38.3824	207.353	89.144	712.804	uni-strand
	cluster189_2	tig00002300	14282	23731	+	305.661	22.6848	741.089	49.6146	uni-strand
	cluster106	tig00002277	6834	35000	+	728.377	139.728	718.948	64.5686	uni-strand
	cluster210	tig00004189	20000	34807	+	299.679	273.98	607.663	175.158	uni-strand
	cluster104	group23	3731478	3760000	+	295.03	60.8428	697.271	68.6258	uni-strand
	cluster98	tig00001795	0	30000	-	280.528	885.515	245.755	519.91	uni-strand
	cluster136	group15	0	22362	-	154.25	400.613	96.6789	666.552	uni-strand
	cluster103	group27	2095978	2125000	-	260.406	551.029	287.139	465.427	dual-strand
	cluster74	tig00003527	6067	41500	-	330.647	594.691	108.387	642.672	uni-strand
	cluster233	group0	22534290	22547603	+	202.77	24.3613	662.726	70.9443	uni-strand
	cluster138_1	tig00000589	0	7248	+	189.389	61.1175	561.99	159.741	uni-strand
	cluster199	group12	4487894	4502962	+	279.113	39.2272	605.924	113.719	uni-strand
	cluster182	group6	16034467	16050600	-	95.3183	566.743	62.1342	646.033	uni-strand
	cluster184	tig00002077	5000	21072	+	272.489	256.427	544.486	148.38	uni-strand
	cluster321	group2	5355790	5366253	-	0.413312	211.603	0.811454	685.215	uni-strand
	cluster237	group5	17596072	17609277	+	130.716	71.151	451.864	231.38	dual-strand
	cluster277	tig00002124	9234	20940	+	283.986	53.8182	618.328	62.8297	uni-strand
	cluster287	tig00004030	3353	14700	-	92.5684	177.025	129.369	531.966	uni-strand
	cluster131	tig00004246	266	23082	+	769.975	195.157	435.055	216.195	uni-strand
	cluster253	tig00000757	11276	23872	+	1463.32	40.6204	636.064	11.4763	uni-strand
	cluster57	group27	1640000	1683496	-	398.684	833.519	49.4987	597.578	uni-strand
	cluster146	tig00002166	2243	22499	-	106.118	432.852	61.7864	580.19	uni-strand
	cluster94	group19	7194543	7225000	-	200.875	690.647	112.792	514.462	uni-strand
	cluster156_1	tig00003889	2947	10234	+	260.977	62.3258	551.093	62.1342	uni-strand
	cluster197	tig00002268	0	15154	-	210.293	375.466	508.434	97.0267	uni-strand
	cluster295	group19	3983863	3994992	+	214.864	82.7439	586.681	16.1132	uni-strand
	cluster284	tig00003159	9410	20902	+	208.229	101.996	434.592	166.696	uni-strand
	cluster219	tig00003219_group27	10000	23962	+	1556.75	180.013	591.666	8.69415	uni-strand
	cluster24_2	group4	15274866	15288385	-	284.926	119.5	510.984	84.1594	uni-strand
	cluster137	tig00002285_group27	0	22203	-	278.925	526.142	359.938	234.162	dual-strand
	cluster177	tig00002084	0	16574	+	368.753	334.33	24.3436	555.035	uni-strand
	cluster170	tig00002139	0	17084	-	37.6625	654.985	38.4861	536.255	uni-strand
	cluster165	tig00003828	0	17499	-	289.84	409.37	96.0993	476.092	uni-strand
	cluster224	group3	18812501	18826365	-	22.6712	191.743	72.6831	492.089	uni-strand
	cluster289	group6	15465665	15476943	+	194.427	26.3058	476.092	77.6677	uni-strand
	cluster111	tig00003740	23278	50492	+	1529.12	119.562	500.667	51.2375	uni-strand
	cluster271	group18	3135578	3147450	+	145.929	13.2648	504.608	45.6733	uni-strand
	cluster260	group9	8932086	8944556	+	210.8	38.5807	445.836	96.4471	uni-strand
	cluster120	tig00003097	0	25029	+	595.605	148.071	447.227	93.3172	uni-strand
	cluster215	group6	5755441	5769747	-	19.8811	272.326	27.9372	510.752	uni-strand
	cluster240	group2	19467016	19480136	+	489.703	35.2499	515.041	19.4749	uni-strand
	cluster270	tig00003887	0	11875	+	381.696	23.5318	517.012	16.8087	uni-strand
	cluster222	tig00001999_group27	15724	29607	-	105.332	201.129	65.1482	465.659	uni-strand
	cluster52	group27	1580000	1625000	-	270.602	742.952	100.504	427.404	uni-strand
	cluster227	group20	3376212	3390016	+	138.896	13.0269	480.149	44.514	uni-strand
	cluster239	tig00001701_group27	6992	20122	-	254.853	379.998	411.755	112.444	uni-strand
	cluster167	tig00001299	10912	28254	+	279.034	75.1437	455.11	64.8004	uni-strand
	cluster300	tig00002299	0	10996	-	47.2923	181.836	71.1761	445.256	uni-strand
	cluster72_1	tig00000922	0	27605	+	565.845	126.593	481.54	30.9512	uni-strand
	cluster90	group27	1168136	1199452	+	1069.01	302.792	426.825	85.0867	uni-strand
	cluster290	tig00004228	0	11276	-	75.5055	313.364	58.8884	450.589	uni-strand
	cluster255	group5	14156172	14168751	-	19.9189	159.606	56.454	448.85	uni-strand
	cluster34	tig00001945	22139	75000	-	442.506	780.172	316.699	178.056	dual-strand
	cluster250	group21	4742914	4755646	-	86.2478	156.132	177.593	297.34	dual-strand
	cluster256	group15	438588	451162	+	125.793	10.6536	433.664	36.8632	uni-strand
	cluster276	group1	3650772	3662577	-	30.209	283.09	51.8171	412.682	uni-strand
	cluster185	tig00003758	3389	19208	-	34.2781	315.786	47.4121	408.973	uni-strand
	cluster254	group5	1495712	1508298	-	26.3907	152.977	73.8423	374.892	uni-strand
	cluster308	group18	157217	167846	+	376.987	2.21496	446.647	1.50699	uni-strand
	cluster296	tig00000986	5895	17005	+	165.986	150.066	58.7725	388.455	uni-strand
	cluster293	group2	3282191	3293394	-	42.5493	154.515	109.199	333.971	uni-strand
	cluster258	group0	7114591	7127106	-	7.23915	120.361	24.9232	416.508	uni-strand
	cluster236	tig00002187	20274	33493	-	103.282	158.973	123.921	306.614	uni-strand
	cluster188	tig00002269_group27	2151	17746	+	161.733	74.9561	394.367	30.0238	uni-strand
	cluster130	tig00002048	27500	50770	+	286.641	176.874	268.823	153.365	dual-strand
	cluster72_2	tig00000922	27605	35656	-	21.3227	172.764	50.542	370.834	uni-strand
	cluster157	tig00003911	3758	22499	-	55.1065	273.608	53.6719	364.922	uni-strand
	cluster151	tig00000059	18637	38442	+	1107.63	64.8198	401.322	10.8967	uni-strand
	cluster208	group0	21489777	21504762	-	108.996	278.29	80.1021	321.336	uni-strand
	cluster269	tig00002950	74535	86416	-	9.66227	414.538	11.3604	377.558	uni-strand
	cluster186	tig00004182	1922	17637	-	274.187	283.841	260.129	123.341	uni-strand
	cluster252	group16	7442492	7455107	-	8.48499	119.761	17.852	359.474	uni-strand
	cluster298	tig00002324	12143	23215	-	128.04	204.603	85.2027	288.066	uni-strand
	cluster280	group19	316581	328185	+	130.767	10.1177	338.956	25.8506	uni-strand
	cluster105_2	tig00001576	13989	28187	-	80.6613	358.921	53.0923	311.135	uni-strand
	cluster307	group5	9751520	9762157	-	3.16642	99.7588	10.8967	345.216	uni-strand
	cluster62	tig00004111	10000	49093	+	625.767	328.395	283.429	70.5965	uni-strand
	cluster160	tig00001249	22250	39967	+	180.257	28.139	333.855	15.7654	uni-strand
	cluster138_2	tig00000589	7248	21783	-	54.8044	505.933	27.3576	321.684	uni-strand
	cluster69	group27	153301	190179	+	934.011	302.951	262.563	83.8116	uni-strand
	cluster174	tig00001841	3098	20000	-	28.7613	227.807	36.1677	301.977	uni-strand
	cluster288	group7	10358079	10369398	-	10.1336	117.567	21.6774	316.003	uni-strand
	cluster77	tig00001929	20000	55000	+	514.21	510.535	196.488	141.077	dual-strand
	cluster83_1	group27	2060227	2075085	-	82.3858	186.486	80.4499	253.985	uni-strand
	cluster118	tig00003721_group27	2775	28211	-	224.189	462.324	48.5713	285.168	uni-strand
	cluster257	group4	4317121	4329649	-	85.6834	119.228	16.1132	311.714	uni-strand
	cluster109	group27	1370000	1397499	-	223.117	406.171	146.989	175.39	dual-strand
	cluster262	group21	2517871	2530225	-	7.88892	89.9213	26.4302	288.762	uni-strand
	cluster95	group27	2556075	2586481	-	269.874	694.925	69.785	244.132	uni-strand
	cluster297	group1	20668865	20679970	+	179.61	19.3229	297.224	16.345	uni-strand
	cluster327	tig00002136_group18	10277	20530	-	28.0885	149.603	37.095	276.126	uni-strand
	cluster268	group4	4551662	4563575	-	6.59822	94.4996	21.3296	285.4	uni-strand
	cluster147_1	tig00004209_group27	11431	23476	+	312.21	19.1572	283.429	20.4023	uni-strand
	cluster163	tig00001919_group27	5000	22499	-	194.014	197.53	99.8088	181.302	dual-strand
	cluster89_2	tig00002013	35674	40000	-	10.9288	76.8123	33.2696	246.682	uni-strand
	cluster181	group2	6691451	6707876	-	28.2052	1899.38	14.9539	262.911	uni-strand
	cluster178	group27	119583	136134	-	123.829	556.077	25.5028	247.841	uni-strand
	cluster283	group6	8067349	8078912	+	408.86	9.81991	259.897	9.04192	uni-strand
	cluster175	tig00001748_group27	2448	19304	-	32.2995	424.528	12.9833	254.449	uni-strand
	cluster273	group8	7316049	7327912	-	22.0586	120.79	18.8953	239.727	uni-strand
	cluster291	group25	219766	231033	+	70.5129	9.7287	225.816	30.3716	uni-strand
	cluster249	tig00003682	10939	23733	+	127.977	30.6097	240.422	14.6062	uni-strand
	cluster311	group6	2975427	2986046	+	92.3278	1.22828	250.507	4.05727	uni-strand
	cluster162	tig00001433	0	17499	-	129.195	384.045	75.6971	175.738	uni-strand
	cluster159_1	tig00004132	32161	42752	+	262.247	65.9484	183.041	66.887	uni-strand
	cluster76	group27	1130000	1165000	-	136.181	660.988	40.9205	202.052	uni-strand
	cluster241	group4	18385124	18398225	+	589.853	35.1323	227.323	12.1718	uni-strand
	cluster145	tig00003865	11315	32001	-	101.077	217.549	21.3296	217.817	uni-strand
	cluster313	group8	9480473	9491061	+	135.131	13.4742	218.049	20.9819	uni-strand
	cluster272	group10	5870809	5882672	-	5.50667	534.661	2.55028	231.38	uni-strand
	cluster309	group0	9601596	9612224	-	18.4117	122.558	3.82543	227.903	uni-strand
	cluster234	group4	2801670	2814976	+	433.804	21.9294	223.034	3.82543	uni-strand
	cluster166	tig00004074	0	17499	+	181.943	62.6886	163.45	44.0504	uni-strand
	cluster324	tig00003313	16659	27054	-	81.7155	106.171	96.2153	98.07	dual-strand
	cluster310	group1	13826920	13837545	-	89.9277	174.773	2.0866	190.112	uni-strand
	cluster292	group2	18564617	18575871	-	99.8372	353.886	183.041	8.23046	uni-strand
	cluster331	tig00004113_group27	0	10050	-	99.2463	238.318	35.0084	155.915	uni-strand
	cluster232	tig00003867	22424	35843	-	29.9619	167.702	21.3296	164.146	uni-strand
	cluster220	tig00004214_group15	8563	22511	-	82.1191	453.203	27.5894	147.337	uni-strand
	cluster265	tig00004132	17387	29633	-	16.4772	139.463	11.3604	155.104	uni-strand
	cluster302	group2	4979971	4990741	-	39.8339	624.652	21.0978	131.108	uni-strand
	cluster189_1	tig00002300	8336	14282	-	11.0891	198.993	5.68018	142.236	uni-strand
	cluster225	group0	22731219	22745074	-	27.7405	2058.56	4.28911	141.077	uni-strand
	cluster159_2	tig00004132	42752	49939	-	20.5053	140.774	10.0852	132.731	uni-strand
	cluster266	tig00004058_group27	11237	23418	-	45.8703	201.388	22.9526	111.517	uni-strand
	cluster105_1	tig00001576	0	13989	+	118.682	35.0864	100.273	32.4582	uni-strand
	cluster315	group15	4785844	4796416	-	16.4869	472.273	5.10057	125.891	uni-strand
	cluster299	group24	4956996	4968050	+	247.928	44.7715	123.573	5.68018	uni-strand
	cluster42	tig00004133_group27	15000	62499	+	739.053	271.859	97.4904	30.6034	uni-strand
	cluster176	tig00003491	12915	29767	-	48.3492	466.522	17.1565	105.489	uni-strand
	cluster228	group15	7752120	7765882	+	364.763	87.5	84.0435	36.3995	uni-strand
	cluster294	group19	5054351	5065504	+	364.92	10.8817	105.721	10.7807	uni-strand
	cluster230	tig00003368	11338	25000	-	39.8174	238.013	9.85337	100.968	uni-strand
	cluster117	tig00004039_group27	0	25886	+	359.232	90.4958	97.2586	5.21649	uni-strand
	cluster79_1	tig00004125	6948	20901	+	717.299	83.1308	97.3745	4.98465	uni-strand
	cluster122	tig00002188	0	25000	+	440.235	131.655	74.0742	23.0685	uni-strand
	cluster214	group6	4894488	4908892	+	230.002	27.1726	90.651	2.43436	uni-strand
	cluster247	group3	1541258	1554107	-	16.8732	130.222	12.9833	77.8996	uni-strand
	cluster319	group5	7929365	7939865	-	54.4731	877.693	8.34638	78.4792	uni-strand
	cluster244	group9	8996623	9009635	+	235.409	26.8268	79.8703	6.49163	uni-strand
	cluster278	group7	3618921	3630573	+	244.497	25.8453	79.4066	5.56426	uni-strand
	cluster187	tig00004081	16438	32096	+	416.656	33.4416	73.3786	0.695532	uni-strand
	cluster325	group1	17234464	17244850	-	18.4036	192.531	3.47766	66.6552	uni-strand
	cluster285	group6	14244536	14255978	+	230.98	94.7139	46.137	22.4889	uni-strand
	cluster282	tig00004120_group27	19396	30986	-	67.9328	257.055	1.0433	65.7278	uni-strand
	cluster286	group25	4760071	4771491	-	25.6281	453.112	1.27514	65.38	uni-strand
	cluster312	group3	13604159	13614756	+	294.434	38.1231	63.4093	3.24582	uni-strand
	cluster251	group19	4400015	4412633	+	347.019	13.1244	61.5546	0.57961	uni-strand
	cluster303	group13	10861849	10872487	-	59.6754	137.648	49.035	11.1285	uni-strand
	cluster195	tig00003156	0	15187	-	223.426	242.615	31.183	18.7794	dual-strand
	cluster207	tig00004086	5000	20000	-	103.553	224.929	6.25979	39.4135	uni-strand
	cluster323	group14	9994020	10004421	-	12.6466	592.091	4.17319	34.4288	uni-strand
	cluster316	group16	2730035	2740603	-	8.54137	1888.09	0	34.3129	uni-strand
	cluster306	tig00003896_group19	40500	51138	+	289.479	13.342	29.5601	4.28911	uni-strand
	cluster155_1	tig00003797	11289	21717	+	92.082	253.561	31.4149	0.347766	uni-strand
	cluster314	group19	6169448	6180029	+	81.0482	9.76709	26.8939	3.94135	uni-strand
	cluster164	tig00002068	5000	22499	+	183.302	119.62	24.3436	5.21649	uni-strand
	cluster243	group25	3967696	3980718	+	2498.38	16.4783	26.5461	0.695532	uni-strand
	cluster248	tig00004120_group27	0	12822	+	260.022	188.964	22.1411	3.01397	uni-strand
	cluster318	group1	1518177	1528698	-	53.5529	58.172	0.115922	21.9093	uni-strand
	cluster304	group16	5131967	5142605	+	142.866	11.8809	19.4749	0	uni-strand
	cluster332	group0	23169049	23179058	-	23.8145	162.706	0.231844	19.0112	uni-strand
	cluster317	group25	655057	665623	+	113.976	2.25144	17.6201	0.115922	uni-strand
	cluster305	group6	8671560	8682198	-	14.3148	408.984	0	17.5042	uni-strand
	cluster322	group0	7332179	7342616	-	59.9692	429.502	0	17.3883	uni-strand
	cluster329	tig00002073	4305	14425	+	77.1871	9.78055	12.5196	2.31844	uni-strand
	cluster320	group1	873450	883931	-	14.0815	113.295	1.50699	10.2011	uni-strand
	cluster123	tig00003622	0	25000	-	9.63956	903.92	0.115922	10.8967	uni-strand
	cluster328	group5	7068215	7078374	+	328.508	33.0541	5.91202	1.39106	uni-strand
	cluster155_2	tig00003797	21717	30427	-	12.8194	337.629	0.231844	6.95532	uni-strand
	cluster201	group17	3630000	3645000	+	248.949	26.0168	6.25979	0.231844	uni-strand
	cluster326	group5	17631700	17642050	-	23.5148	159.192	0.231844	4.28911	uni-strand
	cluster202	group27	2830000	2845000	-	102.644	269.51	1.85475	0.811454	uni-strand
	cluster161	group27	2352500	2370000	-	11.4112	134.917	0	1.62291	uni-strand
	cluster200	group13	9180000	9195000	+	69.6245	56.149	0.927376	0.695532	dual-strand
	cluster203	group4	14680000	14695000	+	425.144	46.2137	0.463688	1.0433	uni-strand
	cluster121	group23	305000	330000	-	12.3598	391.468	0.231844	1.0433	uni-strand
	cluster206	tig00003473	0	15000	+	117.787	3.14042	0.347766	0	uni-strand
	cluster205	tig00002997	0	15000	+	942.245	302.998	0.115922	0	uni-strand
	Note: cluster names with underscores indicate that clustes were split after manual curation

## Sheet: F. Testis piRNA clusters
	Chromosome	Start	End	Cluster name	Strand	RPM on plus strand (apportioned reads)	RPM on minus strand (apportioned reads)	RPM on plus strand (uniquely mapped reads)	RPM on minus strand (uniquely mapped reads)
	group11	2125816	2411289	cluster1	-	28920.2	34924.9	17988.2	15583.8
	group12	11167199	11422487	cluster2	+	29037.4	28030.2	15191.4	15489.1
	group12	2255643	2457489	cluster3	-	10899.8	14322.1	3397.7	6205.55
	group2	9162500	9352371	cluster4	+	20467.9	11683.6	11789.1	5844.48
	group4	7618627	7775000	cluster5	-	5487.74	25697.7	891.8	14887.2
	group19	3972523	4009496	cluster6_1	+	10674.3	564.424	7142.47	19.4447
	group19	4017762	4097070	cluster6_2	-	1713.87	4384.64	1562.31	3565.3
	group12	7719174	7805714	cluster7	-	1220.58	14099.8	210.414	8875.64
	group19	4185018	4212294	cluster8_1	+	1370.73	207.225	1321.96	203.205
	group19	4212594	4267723	cluster8_2	-	92.5131	9318.6	63.9304	8491.04
	group11	2414015	2495000	cluster9	-	633.116	9587.47	33.6725	1472.52
	group19	2127334	2198083	cluster10	-	1698.3	14066.7	88.0228	9550.26
	group25	4371346	4438805	cluster11	+	12459.9	757.796	5208.08	133.584
	group2	9479753	9543639	cluster12	+	7771.34	454.535	3951.13	44.4541
	tig00001362	0	63885	cluster13	+	13631.1	312.98	7614.48	61.3694
	group12	7639323	7699451	cluster14	-	3013.66	7688.56	1847.56	4025.27
	tig00003514	0	58868	cluster15	-	97.8391	21889.5	9.32713	15074.4
	group15	4667500	4725434	cluster16	+	10820.3	239.324	5699.48	37.5931
	group2	9614074	9668295	cluster17	-	775.619	6637.98	51.9158	2070.84
	group11	32994	86544	cluster18	-	561.863	16062.4	25.4204	3464.41
	group2	9552911	9605143	cluster19	+	3075.65	2514.68	1700.19	1316.52
	tig00003749	0	51423	cluster20	+	4295.38	4188.29	2776.67	2604.86
	tig00003740	0	50107	cluster21	+	11213.7	1666.81	1480.11	5.72275
	group25	4830000	4878621	cluster22	+	6141.65	463.726	1243.61	64.7841
	tig00001119	0	41214	cluster23	-	1394.87	6215.98	1002.71	4064.29
	group15	4622346	4662499	cluster24	+	12647.9	64.8783	3139.86	8.75802
	tig00001859	4871	20004	cluster25_1	-	184.994	902.598	59.9466	49.1018
	tig00001859	20004	32908	cluster25_2	+	720.583	65.129	646.513	18.7491
	group0	3440733	3468507	cluster26	-	40.4668	1120.54	3.88894	1053.4
	group24	4677231	4705000	cluster27	-	45.6366	1636.21	1.32793	71.8031
	group19	4139535	4166817	cluster28	+	1098.57	75.0771	1009.83	10.1808
	group24	377219	402162	cluster29	-	63.4115	702.871	16.5359	655.713
	tig00003622	5000	28813	cluster30	-	244.36	4033.53	0.0948522	12.6153
	group20	1929765	1951252	cluster31	+	25692.3	8.6705	3219.73	0.12647
	tig00002274	2896	22499	cluster32	+	930.13	63.5178	837.45	9.64331
	group27	2303595	2323105	cluster33	+	1165.44	78.4757	650.054	8.25214
	tig00004243	3365	22849	cluster34	+	492.416	228.98	26.527	96.7809
	tig00000059	19019	38186	cluster35	+	1807.45	59.8558	186.574	1.16984
	group12	9902787	9920934	cluster36	-	343.65	821.939	342.164	818.796
	group2	8876946	8894692	cluster37	+	613.735	10.2775	579.958	1.70734
	group10	14032500	14050000	cluster38	-	14.0045	345.107	0.221322	1.89704
	group10	8087634	8104736	cluster39	+	628.469	123.433	610.121	106.076
	tig00002431	0	17063	cluster40	+	1963.39	243.281	1414.28	15.4609
	tig00004208_group19	23639	39181	cluster41	+	2277.05	35.9038	5.46981	0.252939
	group25	1869524	1884891	cluster42	-	139.695	365.288	134.058	348.708
	group25	4756450	4771482	cluster43	-	42.3623	1997.19	0.758818	70.159
	group23	3618387	3633201	cluster44	+	2334.29	47.6892	2324.95	47.521
	tig00002251	23172	37901	cluster45	-	23.8577	960.265	3.82571	152.617
	group20	6897293	6911796	cluster46	-	423.597	665.878	371.283	649.643
	group6	4894437	4908850	cluster47	+	555.828	54.4085	69.4318	1.54925
	group4	4316421	4330302	cluster48	-	1156.99	1499.9	11.8249	1002.65
	group2	6691451	6705231	cluster49	-	14.2176	1277.58	1.42278	77.9685
	group0	22731223	22744980	cluster50	-	15.235	1392.11	0.411026	41.6717
	tig00003367	0	13668	cluster51	+	2051.32	93.5312	1466.51	58.176
	group14	8405691	8419181	cluster52	-	60.5299	645.378	4.3632	497.184
	group0	11902413	11915636	cluster53	-	253.524	1495.17	164.853	1394.58
	group2	4980090	4993277	cluster54	-	26.8621	601.154	2.62424	45.2129
	group4	2802129	2815179	cluster55	+	788.927	26.008	92.7338	2.97204
	group15	4753840	4766826	cluster56	-	4.65727	537.059	2.62424	335.303
	group4	18384922	18397888	cluster57	+	606.991	9.16348	97.3816	1.58087
	group9	9585409	9598199	cluster58	+	462.547	26.6589	374.413	7.65141
	group19	7264576	7277084	cluster59	+	1275.57	85.0518	1271.27	84.1971
	tig00003909	0	12268	cluster60	+	1296.45	65.7379	1225.59	45.7504
	tig00000757	11285	23298	cluster61	+	5057.01	298.34	678.573	1.70734
	group6	8067349	8079342	cluster62	+	1441.51	39.7753	325.343	9.23228
	group27	1311303	1323109	cluster63	+	370.765	128.386	353.388	122.77
	group2	19462677	19473801	cluster64	+	469.866	38.9947	65.1951	0.695583
	tig00004230	0	11088	cluster65	-	17.7981	1346.49	0.948522	79.6758
	group12	5424372	5435010	cluster66	-	16.1306	157.267	0.12647	0.316174
	group9	6279961	6290599	cluster67	-	22.8379	767.111	0.0316174	0.347791
	group5	17631461	17642030	cluster68	-	28.6343	492.653	0.158087	7.90435
	group16	2730035	2740603	cluster69	-	19.5697	1246.17	0.0632348	11.9198
	group2	3155887	3166387	cluster70	-	28.0308	453.618	0.189704	11.8565
	group2	19571697	19582185	cluster71	-	20.3	149.771	0	3.09851
	tig00003514	95764	105838	cluster72	-	12.7636	305.779	0.0948522	8.94772
	group8	12724853	12734893	cluster73	+	727.817	119.074	18.3697	30.8902
	group2	19964698	19974712	cluster74	+	673.631	6.74023	9.70654	0.284557
	group14	9594341	9604349	cluster75	+	442.817	152.684	29.0248	0.569113
	tig00003896_group19	40500	50508	cluster76	+	231.309	28.3202	9.2639	8.03082
	Note: cluster names with underscores indicate that clustes were split after manual curation

## Sheet: G. Female thorax piRNA clusters
	Chromosome	Start	End	Cluster name	Strand	RPM on plus strand (apportioned reads)	RPM on minus strand (apportioned reads)	RPM on plus strand (uniquely mapped reads)	RPM on minus strand (uniquely mapped reads)
	group11	2127384	2317499	cluster1	+	24326.4	21503.7	12770.5	11490
	group4	7625000	7760956	cluster2	-	3662.48	15956.3	356.789	8596.13
	group12	11290000	11422323	cluster3	-	2574.8	21953	356.366	12649
	group12	11167158	11288652	cluster4	+	29986.1	2315.79	19002.3	388.648
	group2	9162500	9281760	cluster5	+	15600.2	1607.14	8408.32	637.985
	group12	7718952	7805583	cluster6	-	3049.64	13411.1	298.989	7541.22
	group12	2373699	2457499	cluster7	-	943.638	14119.3	100.957	8426.89
	group15	4620953	4702061	cluster8	+	37435.8	190.014	8145.54	14.8342
	group2	9480148	9544269	cluster9	+	5271.67	638.273	1739.29	21.867
	tig00001362	2091	64498	cluster10	+	10875.4	208.309	7459.51	38.7764
	group25	4373405	4430967	cluster11	+	9958.42	468.814	4672.61	82.3566
	tig00003514	0	54658	cluster12	-	57.3787	23678	10.6452	18985.3
	group2	9290868	9345353	cluster13	-	373.824	9035.47	142.193	3927.94
	group11	37628	86191	cluster14	-	105.554	29839.6	21.2136	3061.68
	tig00003749	7413	51494	cluster15	+	4399.95	1945.51	2311.67	1110.1
	tig00001119	2428	41214	cluster16	-	858.218	3583.47	525.921	1958.23
	group25	4835000	4871402	cluster17	+	6477.42	217.869	940.74	14.7573
	group12	7668320	7699454	cluster18	-	127.154	6071.14	17.947	2785.87
	group24	4678006	4705000	cluster19	-	27.8169	1495.65	0.76861	73.9019
	group12	7639266	7665671	cluster20	+	3674.52	612.724	1043.16	172.822
	group2	9628572	9653717	cluster21	-	252.727	3339.42	14.104	772.03
	group2	9582500	9605372	cluster22	-	3059.25	4644.25	371.777	1978.06
	group20	1929399	1951692	cluster23	+	51092.6	101.455	7958.3	1.92152
	group4	4307500	4329793	cluster24	-	589.339	1148.73	5.87987	640.137
	tig00002235	11822	33933	cluster25	-	44.7946	4869.11	12.2978	3141.77
	group12	2299838	2321929	cluster26	+	3795.51	200.354	187.041	27.9774
	group11	2433730	2454422	cluster27	-	72.8373	2091.88	4.5348	462.473
	group17	2595000	2615000	cluster28	-	6155.91	21038	1515.28	0.576457
	group27	2303609	2323178	cluster29	+	1092.9	123.974	601.015	11.6829
	tig00001859	14802	33512	cluster30	+	329.859	86.9886	251.105	10.0304
	group11	2379462	2396416	cluster31	-	49.0008	2101.53	0.461166	97.8441
	group12	2264496	2280678	cluster32	+	1753.13	45.1262	1100.8	35.0102
	group11	2480000	2495134	cluster33	-	136.827	1135.61	0.153722	16.4483
	group16	8605000	8620000	cluster34	+	1128.79	528.223	8.5	0
	group5	17627163	17642018	cluster35	-	44.3965	447.116	0	7.49395
	tig00001980	2804	17592	cluster36	-	382.161	10614.1	0.230583	398.063
	group23	3618383	3632594	cluster37	+	2304.2	48.0439	2298.11	47.6923
	group4	2801704	2815810	cluster38	+	826.267	63.5983	81.4727	5.72614
	tig00004230	0	13921	cluster39	-	84.0283	1438.98	1.03762	101.918
	group20	6897283	6911088	cluster40	-	417.69	839.687	356.404	819.646
	group2	7791730	7805404	cluster41	+	852.05	0.123851	852.043	0.0384305
	tig00003367	0	13504	cluster42	+	1412.24	62.9234	1045.54	37.4697
	group14	8405660	8418676	cluster43	-	41.3132	376.284	0.614888	361.631
	group27	681332	693976	cluster44	-	309.664	738.773	302.41	6.91749
	group23	1226225	1238751	cluster45	+	213.679	0.00848211	204.066	0
	group19	7264606	7277054	cluster46	+	516.69	32.9746	516.083	31.8973
	group7	15696919	15709144	cluster47	-	205.487	735.541	1.57565	31.0518
	group11	2327686	2339882	cluster48	-	15.4088	1107.36	2.88229	150.993
	group12	9902787	9914640	cluster49	-	1891.49	4106.57	1890.28	4103.84
	group25	4760070	4771487	cluster50	-	215.795	4166.67	4.99596	203.528
	tig00002274	3463	14510	cluster51	+	394.351	34.9004	377.772	5.64928
	tig00000922	46724	57578	cluster52	+	3165.81	404.931	40.3136	35.0486
	tig00003909	0	10770	cluster53	+	755.236	27.4819	739.71	26.7476
	tig00002251	27197	37901	cluster54	-	14.9808	947.381	1.3835	112.14
	tig00004189	1072	11708	cluster55	+	445.844	58.7741	334.192	9.60763
	group2	19462673	19473268	cluster56	+	566.823	10.1651	105.107	1.3835
	group22	771887	782468	cluster57	+	738.069	59.0266	6.99435	0
	tig00004217_group27	11087	21662	cluster58	+	226.584	11.2694	15.3722	0.922332
	group2	5355924	5366421	cluster59	-	0.196765	352.3	0.076861	339.303
	group0	1245855	1256268	cluster60	+	8526.81	373.321	39.6218	25.6716
	group16	2730195	2740600	cluster61	-	12.5426	1244.07	0.0384305	6.91749
	tig00004208_group19	25076	35202	cluster62	+	4330.23	149.264	4.80381	1.03762

## Sheet: H. Male thorax piRNA clusters
	Chromosome	Start	End	Cluster name	Strand	RPM on plus strand (apportioned reads)	RPM on minus strand (apportioned reads)	RPM on plus strand (uniquely mapped reads)	RPM on minus strand (uniquely mapped reads)
	group11	2127134	2402499	cluster1	-	30904.1	37906	17462.5	15189.7
	group4	7624123	7775000	cluster2	-	4760.68	21801.5	735.239	10913.9
	group12	11287006	11422741	cluster3	-	3593.25	31858.5	664.432	18140.4
	group12	11166099	11286374	cluster4	+	30372.7	2456.69	17739.4	501.911
	group2	9162500	9282132	cluster5	+	14353.9	1965.37	6799.54	876.656
	group12	2357500	2457499	cluster6	-	1117.29	10459.8	105.422	4176.33
	group12	7722299	7802499	cluster7	-	963.38	14112.5	144.474	8496.05
	group2	9282920	9347861	cluster8	-	833.087	11192.2	177.363	4485.94
	group25	4371248	4434814	cluster9	+	16267.2	628.284	6272.98	89.5935
	group11	2422500	2485000	cluster10	-	485.859	8409.81	14.1515	1321.91
	tig00001362	1949	64005	cluster11	+	13426	248.759	9720.78	45.3638
	tig00003514	0	58899	cluster12	-	46.842	23271.5	3.94468	17101.5
	group12	7646599	7699742	cluster13	-	1367.39	5515.3	921.576	2578.64
	group15	4667500	4712499	cluster14	+	12956.8	136.119	7585.42	15.6801
	tig00003749	0	43506	cluster15	+	5271.13	1597.44	3232.47	786.372
	group15	4620760	4664205	cluster16	+	26561	40.3793	2640.03	4.14191
	group11	36331	78957	cluster17	-	161.403	31293.2	31.804	3362.25
	tig00001119	2330	41214	cluster18	-	986.688	4305.08	683.416	2535.15
	group2	9487500	9522499	cluster19	+	1979.99	432.125	713.494	6.9525
	group25	4839978	4870983	cluster20	+	5429.41	162.236	1230.2	14.0036
	group2	9627243	9657499	cluster21	-	242.057	3671.26	20.5616	1158.11
	group24	4676705	4705000	cluster22	-	20.24	1809.9	0.788936	76.3296
	group12	2259325	2282312	cluster23	+	3383.64	69.6576	1452.38	46.2514
	group20	1929405	1951698	cluster24	+	32426.7	129.643	3609.04	1.82441
	group2	9522500	9544269	cluster25	+	2717.8	26.3254	369.173	4.14191
	group17	2595000	2615000	cluster26	-	4100.92	14719	972.709	0.443776
	tig00002274	2707	22499	cluster27	+	624.255	33.4202	573.951	7.98798
	group27	2303595	2323206	cluster28	+	1569.1	168.474	881.537	10.6999
	group2	19462667	19479894	cluster29	+	606.115	17.974	89.7908	1.47925
	group23	3618385	3632822	cluster30	+	2346.62	26.1213	2340.82	25.887
	group4	2801700	2815808	cluster31	+	710.516	54.0096	46.3993	7.14973
	group2	9586458	9600141	cluster32	-	734.046	1147.65	208.674	594.71
	tig00003367	0	13500	cluster33	+	2479.83	81.4621	1852.22	54.0421
	group14	8405660	8418683	cluster34	-	36.9833	349.287	0.493085	316.856
	group4	4316864	4329799	cluster35	-	1006.31	1571.39	9.31931	936.96
	group2	7792588	7805474	cluster36	+	595.159	0.212884	595.154	0.147925
	group23	1226189	1238752	cluster37	+	341.467	0.0524139	338.749	0.0493085
	group19	7264564	7277124	cluster38	+	665.823	29.4606	665.714	29.3386
	group6	8067376	8079314	cluster39	+	1298.44	22.3628	319.963	6.90319
	group12	9902787	9914643	cluster40	-	1243.77	4895.29	1242.97	4893.28
	group27	2519516	2530593	cluster41	-	6.8203	698.203	0.788936	697.962
	group6	10054417	10065488	cluster42	+	3282.84	149.942	2.85989	2.07096
	tig00000922	46643	57578	cluster43	+	4070.16	374.449	45.5117	70.6098
	tig00003909	0	10654	cluster44	+	685.344	31.7131	671.138	31.3602
	group10	1832782	1843420	cluster45	+	536.235	2.71518	321.837	0.788936
	group23	4078430	4089068	cluster46	+	454.315	23.3749	6.1	0
	group8	8137142	8147780	cluster47	+	86.3412	64.5064	0.098617	1.23271
	tig00004189	1232	11870	cluster48	+	450.41	35.9741	340.722	2.41612
	group20	6897286	6907914	cluster49	-	48.5889	616.287	8.1359	600.43
	group25	3967560	3978187	cluster50	+	1509.68	20.4711	9.36862	0.0493085
	tig00004217_group27	11102	21696	cluster51	+	139.443	5.63182	8.38244	0.246542
	tig00004230	0	10539	cluster52	-	28.012	1944.22	1.23271	117.502
	group16	2730124	2740608	cluster53	-	15.0085	1162.84	0	8.82622
	group8	12723444	12733723	cluster54	+	1278.85	213.929	8.08659	7.93867
	tig00004208_group19	24767	35044	cluster55	+	4797.02	173.773	7.93867	0.739627
