# Supplementary material for: The genome of the Hi5 germ cell line from Trichoplusia ni, an agricultural pest and novel model for small RNA biology
Source: eLife journal article supplement (doi:10.7554/elife.31628), 2018-01-29
Supplement: supp [file elife-31628-supp-v1.zip › elife_poa_e31628_Supplementary_File_5.xlsx]

## Sheet: Sheet1
Genomes used in the orthology analysis
Species	Short name	Name	Order	Database	Version	Reference	URL
Acyrthosiphon pisum	apis	Pea aphid	Homoptera	AphidBase	OGS 2.0	(The international aphid genomics consortium, 2010)	https://www.aphidbase.com/Downloads
Aedes aegypti	aaeg	Yellow fever mosquito	Diptera	VectorBase	AaegL3	(Nene et al., 2007)	ftp://ftp.ensemblgenomes.org/pub/metazoa/release-31/fasta/aedes_aegypti/pep/Aedes_aegypti.AaegL3.31.pep.all.fa.gz
Anopheles gambiae	agam	African malaria mosquito	Diptera	VectorBase	AgamP4.3	(Holt et al., 2002)	https://www.vectorbase.org/downloads
Apis mellifera	amel	Western honey bee	Hymenoptera	BeeBase	OGSv3.2	(The honeybee genome sequencing consortium, 2006)	http://hymenopteragenome.org/beebase/?q=download_sequences
Atta cephalotes	acep	Leafcutter ant	Hymenoptera	HGD	OGS1.2	(Suen et al., 2011)	http://hymenopteragenome.org/atta/?q=genome_consortium_datasets
Bombyx mori	bmor	Silk moth	Lepidoptera	SilkDB	v2.0	(The international silkworm genome consortium, 2008)	http://sgp.dna.affrc.go.jp/ComprehensiveGeneSet/files/GenesetA.pp.fasta.zip
Danaus plexippus	dple	Monarch butterfly	Lepidoptera	MonarchBase	OGS 2.0	(Zhan, et al., 2011)	http://monarchbase.umassmed.edu/download/Dp_geneset_OGS2_pep.fasta.gz
Drosophila melanogaster	dmel	Fruit fly	Diptera	Flybase	r6.12	(Adams et al., 2000)	ftp://ftp.flybase.net/releases/current/dmel_r6.12/fasta/dmel-all-translation-r6.12.fasta.gz
Drosophila pseudobscura	dpse	Also called fruit fly...	Diptera	Flybase	r3.04	(Richards et al., 2005)	http://metazoa.ensembl.org/Drosophila_pseudoobscura/Info/Index
Harpegnathos saltator	hsal	Jerdon's jumping ant	Hymenoptera	Harpegnathos saltator Genome Project	OGS v3.3	(Bonasio, et al., 2010)	http://hymenopteragenome.org/harpegnathos/?q=genome_consortium_datasets
Homo sapiens	hsap	Human	Primates	Ensembl	GRCh37.62	(International human genome sequencing consortium, 2004)	http://www.ensembl.org/Homo_sapiens/Info/Index
Linepithema humile	lhum	Argentine ant	Hymenoptera	HGD	OGS1.2	(Smith et al., 2011a)	http://hymenopteragenome.org/ant_genomes/?q=genome_browsers
Mus musculus	mmus	House mouse	Rodentia	Ensembl	NCBIM37.62	(Waterston et al., 2002)	http://www.ensembl.org/Mus_musculus/Info/Index
Nasonia vitripennis	nvit	Jewel wasp	Hymenoptera	NasoniaBase	OGS1.2	(Werren et al., 2010)	http://metazoa.ensembl.org/Nasonia_vitripennis/Info/Index
Pediculus humanus humanus	phum	Body louse	Phthiraptera	VectorBase	PhumU2.1	(Kirkness et al., 2010)	https://www.vectorbase.org/downloads
Plutella xylostella	pxyl	diamondback moth	Lepidoptera	DBM-DB	v1.1	(You, et al., 2013)	http://iae.fafu.edu.cn/DBM/
Pogonomyrmex barbatus	pbar	Red harvester ant	Hymenoptera	HGD	OGS1.2	(Smith et al., 2011b)	http://hymenopteragenome.org/pogonomyrmex/?q=genome_consortium_datasets
Tetranychus urticae	turt	Two-spotted spider mite	Trombidiformes	Ensembl	ASM23943v1	(Grbić, et al., 2011)	ftp://ftp.ensemblgenomes.org/pub/metazoa/release-31/fasta/tetranychus_urticae/pep/
Tribolium castaneum	tcas	Red flour beetle	Coleoptera	BeetleBase	v3.0	(Richards et al., 2008)	ftp://ftp.bioinformatics.ksu.edu/pub/BeetleBase/3.0/Sequences/
Dendroctonus ponderosae	dpon	Mountain pine beetle	Coleoptera	Ensembl	DendPond_male_1.0	(Keeling, et al., 2013)	http://metazoa.ensembl.org/Dendroctonus_ponderosae/Info/Index
