# Supplementary material for: The genome of the Hi5 germ cell line from Trichoplusia ni, an agricultural pest and novel model for small RNA biology
Source: eLife journal article supplement (doi:10.7554/elife.31628), 2018-01-29
Supplement: supp [file elife-31628-supp-v1.zip › elife_poa_e31628_Supplementary_File_6.xlsx]

## Sheet: A
P450 genes
	T. ni	B. mori
CYP2	6	7
Mito	10	10
CYP3	60	33
CYP4	32	33
Total	108	83

## Sheet: B
	T. ni P450 genes
	Putative gene name	Peptide sequence
	CYP15C1	MIKEVSSREAFEGRPNGFFYLMRQFGKKYGIVFNDGASWTNTRRVVLKYLKHFGYNTRLMESYISEECRALVKLRYDLEDEKLTTLCNLIMRLFKASDMSGGILNFMPLIRYVAPNLSGYNEIHSMHKAIYDFLRETIKEHQQSLDVNNPRDVIDAFLIEKVQSPDVSFTDEELQVVCLDLLEAGMETVSNTAVFMLLYIVRNDDVQKRLHDEIDEVIGSQRAPALSDRSRMVYTEAVLLESLRISSVASVGIPHMALEDARLGNHIIPKGTFILLAMYDLHHGEHWNDPETFRPERFITKDGNLMQDEWLLPFGTGRRRCIGEGLARSELFLFVTNILQKFRLKTPDGVTAPSPEPNEGVSLSAKPFHVIFEPRA
	CYP305B1	MISTFLVLFAVTLILYMFVSTIKPKRFPPGPVWYPFIGSSGILQKLSKQLGSEFKACLELSRQYSTNVLGLKTSSELLIVVFGVKNVRQVFNNSEFDSRPHNFFSRLRCLGLTNRGITFANGEIWKEHRQFTVKNLKHVGYGEPIKEDKLKYLLDLFRKRGKAFSVGGGLLNQIPWSRFVIPEMSGYTLITKINQEISQIIEEAIEKHKTKQVEGKDFIYLFLEEMNTTKSPTFTEEQLKIVCLDLLIAGSHTTSNLLGFAFLKALKSPDIQEKIYNEINSLIGDRMPCWNDSNRLIYTSAFIQEVHRYYTIVPMAGPRLLQRDTCIDGYLVPEGSTILISLADICHDPELWGDPHVFRPERFIDERGMLKNSDHMYPFGLGRRRCPGDSLAKSFIFIT…
	CYP4AU2	MIILAVLLLAVCVYWIRWSARAQRMDRMTSQLPVPPTLPLIGNASIFIGDTQPIADPEDAQVVLENCLDKDSVYRFMRPWLGHGLFVAPVDLWKVHRKVLLPIFHNKVVEEYLDVIAEQGKVLIGRLHEQANRGNFDVLKYITACTLDIVFETAMGERMDVQRTPETPYLRARHIVMTILNMRLFKVWLQPEFLFNLTHYAKQQNENILITHKFTDEVVQKKRLEYERNKDGNGLKKQPEGKLRSVLDLLFGREIEFTNEQLREHIDSITIAGNDTTALVIAYTIVLLGAHQDVQEKVFLEQQSIFGAASRSPTKDDLQKMYYLERVIKESMRLYTVVPIIARNVDKDIYLRRNFGMLIMKSLISTIVRSYRIEADDIGALKIEVLLFPINGHQVKILK…
	CYP4AU1	MLVLVLLLLVSALYYLHFRRSRKLIYEFSETLPTTGDLPLLGHTHWFIGSPERILNNVRTLVENIDEMGSISKVWIGPTLYVVTLNPEDVQKILENCLEKDYSYKFLQAWLGNGLFVAPVDLWKAHRRLLLPIFHNRIIEDYIEVFAEQGQILVTRLHEQVGRKQFDIYEYITSCMLDIVFETAMGEKMDVQHNPDTPYLRARKTVMSIINMRLFKAWMQPDALFSLTTHAGIQKENIEATHKFTDEVIRKKIAAFEQSSHKEGRKDILQLLLERKLEFSNVELREHIDSITIAGNDTTALVISYALLLLGSHQDVQDKVCEEIKVIFGSSLRSPTKEDLSKMDYLERVIKETMRLYTVVPIIGRKTQKELKLSTCSIPAGVGCAVVPMVMHRSKKIWG…
	CYP367A1	MWLILVFLPIAAFLYWQYWKLTHKRLLELAAKIPGPPALPILGNALLFSGDPEEMLHNMAVKPYGEYARFWLGPDLNIAVKNPADIRDLLTSNKLSKKGPTYEFLKPLLGYGLIVGGPNWRQHRKIAITSYNKKCVSQFSPVFNKEAEQMARVISNRDPNVAFDVYKDVVKCTTQCVNLYSKIPFIYWLLGYPIRLKYFTKLVDDFAKDVVEKRRKALAESTPNEETMCIVDRFILSGELSEEEIKLETFTAFTSSQEPTANVASGILMILAHLPDWQDKVYNEMLEVLGPSGPVDAEQLKQLHYLDMVLLETVRYFPAAVLIQRTVLEDVSIDNGRITLPAGISVVFPIHELNNDPQYWEHPKKMMPDRFLPENVKQRDPNVFVPFSLGPMNCLGRIY…
	CYP367B1	MIWPLYFIIGALSAFWLVWRYQNRRMIAMASKIVGPPAIPLLGNALLFMGQPEQFVKLLRDLTTKYGSVFKLWLGPDLNIVVSDPDDLKVLLATPKTNSKGPQYKYMADLLGGGILSGSETLMGLTREEATTLPHLEEIIDKTQCEYDVIFQRMTKWYLQIDPVFWASKQHSEQKRFMSIMEEFSEKILQHRLEKLKNLDDSKRDLMNSEDDAVINTQLSVIDRFILSQELDQDELVKETFTIFTSSQEASAKISSFLLLMMAYHPECQAKLYDEIKTVIGNDDRCLTDKDLKKMPYLEMVFKEVLRLFPIGAILQRTVNEDIEISSCTLPAGSSLVAPIYHLHRDPRFWTKPEYFDPERFNPENTNNRNPNAYVPFSLGPMDCLGTGLALLRITLVGG…
	CYP49A1	MSGARCYAVMPGPRPLPIIGNSWRFAIGKNPWKTRALDVSLWFLRALAGAGGAAKVARLFGHPDLVFPFCAEETARIYRREDSMPHRAKAPCLSHYKQDLRKDFFGDEPGLIGVHGEPWSRFRSKVSKALIAPEAAKTAVPDLEYVTNDFVHRMECILDDNRELPKDFLTELYKWALECECYLTSGATFCELYCAFPHKLVPSAVGAWALGTRLGCLKDNDAEAREIIRCIHGFFHSVPALELSAPLWRVYSTPAYKTYIEALDGFRSLCLQRLTDKGICSQIAKNYGEKVATILALDLLLVGVDTTAAAAASTMYLLAKNDRAQRKLHVELNNNLPRGRGMCSKDLDKLPYLKACVKESLRMKPVILGNGRCIQSDAVISGYEVPKGSHIVFPHYVLS…
	CYP6AB2	MQKASMATVATETYNKYPEEKVVGFFRGTDPELVIRDPEIIKRILTTDFQYFYARGFHPHKTVIEPLLKNLFFADGDSWRLIRQRFTPAFSTGKLKAMFHIITDRAEKLQVITEEIVDREFYDVRELMARYTTDFIGVCAFGIDMDSLTDENSHFRRLGKRIFERRFRDAIIAAVKIMFPELFKNLHFLAPELEINMKHLVQTVLKNRNYKPSGRNDFIDLMLELREKGKIIGESIEKKNPDGTPKMVELEMDDMLMTAQAFVFFGAGFETSSTASSFTLHQLAFHPEFQEKVQREIDIVLSKHNNKITYDAIKDMKYLEMAFYESMRMYPSVAYLIRMCCVPEYTIPEIDLTINEDVKVIIPIQAIHRDEKYFREPHKFDPERFADGAKEAIKNFVYL…
	CYP340Q8	MFAVALFCIACAAYWAWRRKNTKITEPPYFPGGWPILGHAPALIGDSCKLWNGINDLANQSYDIGGVVAASIGPRTVYIVTDPDDSFTISNTCLEKDGFYDFAKPWLGEGLVTGKFSIWKSHRKLLNPAFSQILLDTFMGVFNSQSRKLVRDLEKEAGKVTALGVDFTDSNLNTQYVEATEKIFTTIVERFMKFWWHSPYTFALSDVKRRQDACLKILHNMSNTVLQKRKSEFTGNVCAERSIIPGTRFKAFLDLILELSAEKGAFNDREVREHVDTMIVGGHDTSANVLMFTMVLLGSHPEAQEKAFAEIQEVLGDGDRDVEKTDLSKLVYLEAVLKESMRVFTIVPVLARKLDRDVKLKNYTLSAGRTCFLFVFGIHKHPMWGPDVHEFKPERWLEP…
	CYP340Q9	MLLLILFCCACAVYFLWNRKNLKTTEPPHLPGGWPIVGHGLDIIGDGCHLWDRLIVIGDKVHDIGGVATVRAGPKSVYVPLWKEQRRLLNPAFNQSLLDTFMGVFNSQSRKLVQELGKEAGKVTSLGVDFSQTDLSKTEYLEALENMFSTMEERLVKFWLHSPYTFAFSDVKKRQDESVKALHRVSNTVLQTRKAELNRNVSDERSLKYQDLVLELSAEKGVFNDREIREHVDTMIVGGHDTSANVFLFAMILLGSHPEAQEKAFNEIKEVLGDGDRDVEKTDLSKLVYVEAVLKETMRMFTIGPILARKVDKDVKLKNYTLSAGRSCYLFLFGIHKHPMWGPDVHEFKPERWLEPGRLPDNPNAFAGFSYGRRNCIGKAYALMSMKTSLAHLIRRYQV…
	CYP340G3	MISVLLLCVIWCGCVVLAWRAYGKKGTAHPLPPALSGGLPIIGHSLKTIGDTEGIWHILNDMSKECVQKGGVITAHIGPDLYYLITDPDDALTAANACMQKHFIYDYVKTWLGEGLLTSSGALWQRHRKLLNPAFTVSVIHSFLGIFNHMSRQMNEEVEVHVGKGHFDHSTYLRLIAFQTFSRTGFGISDSKVKEFARKYMESSDQIMNLVIHRFQNIWLHSDLIFKLSGLKKKKDRLIKILDNMANQVIEGKKEEMKNASKGERTYEYSVTGKTYAMISMKVTLAHFIRKYRITADVNELRFKVDMLLKATKASIRIDKRE
	CYP4L37	MVSVIIVLLLLASWISMIRENKRFNIKGPTPLPLIGNAHLFIVKSSEFLNLIHKLSLKYGQAFRVHFFLRPYVVLTHPKYVEELVSTMEHITKGRSYSFLSDWLGQGVLTTTGQKWKSQRKFLTPAFHFNILQNFLPVFCKNQRVLTEKLKKMADGRNVDLFPIVALTALDNVNESIMGVSIDAQEQSHSVYVQAIDVLSRIVSMRIQIPFLGEDAIFNLLPIKTKQDKALKVVHDQTTRVINTRRQELKNLNITSLNASDDVGIKNKHAFLDLLLLSDIDGHKIDDVSVREQVDTFMFAGHDTTTSGIAYTLYLLSKHRDVQEKIYEELKTIFNDDMHRDPTYQELQQMKYLEMVLKESLRICPPVPLIERRITKDCEVGGIKFVKGTSVMIDIYQIQ…
	CYP4L39	MFSQPTVILNHPKYIEELITSTDHITKGVQYNFLLSQKWKSHRKFLTPAFHFNILQNFLPVFCKNQRVLTEKLKQMADGRNIDMFPLVALAALDNVTESIMGLCIDAQQHSKSDYVQSVDELSRIVTMRMQIPILGEEAIFNLLPLKTKQDKALKVLHGQTNQVINARRQELKKLNITTLKASDDVGIRNKHAFLDLLLLSEIDGQKINDQSVREEVDTFMFEGHDTTTSGIAYTLYLLSKHRDVQEKIFEELKTIFTDDLHRDPTYNEFSQMKYLELVLKESMRLFPPVPLIARLITRDCEIGGLKLVKGTSVLMNIFQIHRHPEIFEDPLEFRPERFEGPLKHAFAWVAFSAGPRNCIGQKFAMMELKITISEIIKNFIILPSDQTPELSADLVLRS…
	CYP4L38	MEHITKGRSYSFLTCWLGQGLLTSTGQRWKSHRKFLTPAFHFNILQNFLPVFCKNQRVLTEKLKKMADGRNVDLFPIVALAALDNVTESIMGVCVDAQKHSKSDYVQSIDELSRIVSMRMQIPILGEDPIFNLLPYKTRQDKALKILHGQTNQVINARRQELKNLNITALNASDDVGIRNKHAFLDLLLLSEIDGQKIDDESVREEVDTFMFEGHDTTTSGIAYTLYCLSNHRDVQEKIYEELQTIFIDDMHRDPTYHELHQMKYLELVLRESMRLFPPVPMVERRMMRDCEVGGLNFLKGTSVVINIFEIQRQPELFEDPLEFRPERFEGPLKHAFSWLAFSAGPRNCIGQKFAMMELKITISEIVKNFIILPSDQAPELSADLILRSQNGVHVKLRP…
	CYP4G75	MSYAAAESVVPTSTWAATNLFYVLLVPALILWYAYWRMSRRHMYELAAKLHGPPGLPLLGNALEFTGGSHDIFRNIIEKSIPYDGESVVKIWIGPRLLVFLYDPRDVELILSSHVHIDKAEEYRFFEPWLGNGLLISTGQKWRSHRKLIAPTFHLNVLKSFIDLFNANSRAVVSKLKKEAGEFDCHDYMSECTVEILLETAMGVSKSTQDQSGFEYAMAVMKMCDILHLRHTKIWLRPDLLFNFTDYAKKQTKLLDIIHGLTKKVIRRKKEEFKSGKRPTILSDYTNPTEETGKTTSVEGLSFGQSAGLKDDLDVDDADVGQKKRLAFLDLLLESSQSGVVISDEEIKEQVDTIMFEGHDTTAAGSSFFLSMMGIHQDIQDKVIDELDKIFGDSDRPAT…
	CYP4G74	MTSLVEEAQVPSYNTRLIFYPLLLLASSIWILYRWQQKSRFHSIAEKLPGPPAIPFVGNALLVLRKNPTQLVEFALKFAEQFGNVIRVWLGTNLLVFLTDPNDVEVILNSNVHIDKSTEYKFFKPWLGEGLLISTGDKWRSHRKMIAPTFHINILKSFVSVFNQNSKNVVEKMKGEMGKVFDVHDYMSGVTVDILLETAMGITRKTQDESGFDYAMAVMKMCDIIHQRQYKLWLRFDAFFNRTSFFNQQKKLLNTIHGLTTKVIKSKKEIYLENKSKGFIPPTLEELTKSTDDNVLANNDKSLSEDVFKGYRDDLDFNDENDIGEKKRLAFLDLMIESAQNGTNNISDEEIKEEVDTIMFEGHDTTAAGSSFVLCLLGVHKDIQTKVYDELYEIFGDSD…
	CYP4G87	MTSIFDTTHEVNYTRLIFYPLLLVTSVLWVLHRWQQKSRLYQLGQILPGPQTVPFFGNALLAFGKRPDQLVEIALSYADKYGSVVRGFLGSKLVVFLADADDVEVILNSQVHIDKSSEYRFFKPWLGEGLLISTGKKWRYHRKIIAPTFHINILKSFVDVFNQNSKNVVEKLQTEIGKTFDVHDHMSTATVDILLETAMGITRKTQDESGFDYAMAVMKMCNIIHQRHYKFWLRFDALFKITPFFKKQKQLLDIIHGLTNKVIKSKKQTYFENKAKGFIPPTLEELTRSSDNDILANDNKTVSDTVFKGYRDDLDINDENDIGEKKRLAFLDLMIESAQNGTNQLTDHEIKEEVDTIMFEGHDTTAAGSSFVLCLLGIYKDIQAKVYNELYEIFGSSDR…
	CYP4G9	MTSVLVSDELGTTTTRLVFYPLLLLATGVWLFHRWQKQSRMHRMGDLLPDFINIAWQFVGKYGFVIRGWIGSKLVIFLANPEDVEVILNSNVHIDKASDYKFFEPWLGNKWRSHRKMIAPTFHINILKSFVDVFNENSKSVVAKMRSEVGKTFDVHDHMSGVTVDILLETAMGITKKTQDKSSFDYAVAVMKMCDIIHQRHYKFWLRLDFLFKLHPLYKTQQKLLGIIHGLTNKVIAFKKKVYLENKAKGIIPPSLKELTEGEKKRLAFLDLMLESAQNGTHNISDHEIKEEVDTIMFEGHDTTAAGSSFVLCMLGLHQDIQTRVYDELYEIFGDSDRPATFNDTLQMKYLERVILETLRMYPPVPIIARELKHDAKIVVCPYGVHRHPKHYENPNKFN…
	CYP354A19	MEYFSGSKKLLLFILEDWKLLLFLTTLFALYFYYTKNFDFFEKKGIPYKKPVIFLGNLGPRLRGTQSFHDFQLEAYNYFKGNRYGGLFEGRRPILSLLDPDLIKVVMIRDFDHFTDRISLNSKEPKFWSRSLLNLKGAEWKGVRSTLTPVFSSSRLRNMLPLIQYCSNQMVDFLKQYDKKDVEMKKTIGHFTLEVIGTCAFGIKSDSLTDENAHFFTVAEKYDYMPLHKRLLLFFFLIFMPQLIKFLNFSFLNLDSAKEMVRILKAAKAERRKSGAKQNDFLQILIDFSDKEKSESGKTKADIHLDDDTIDAQCLLFLIAGYETSSTLLSFAIHVMATKPELQEKLRAHIKEMTEGKEVDYDLLAQLHYLEGFLLETLRVYPPLARVDRVCTKPYVIPG…
	CYP333A16	MNVFLLNAMKNKSLSKSYKLMAVYTQGRNYSTPIQDAKPFNSIPGLSSLPIIGPLHHFLPVVGSFGPKADLFNVVGTLHKKFGPVVKMKGILARADMVFLFEPEYIDQVYRVQEANPLRPGFETLEYYREVIKKDTLVGVFGLTTAQGEKWRDFRTKVNPAMLKIKLVKVYAPGLEEIAYDTVERFKRIKDDESYMETNFVSEINKWSLESVAYVALGSRMGCLHDDLTEEHPSRKLMQCSKDIIETAFKLEFLPNPWKYISTPAYRKIIKTFDTQWEISKQYIDSTRKRIDERGYDIPEEEKSIVEKLLAIDERVAILMGSEMLMAGIDTVAFTATNMLYNLATNPDKQKKLREEIRSGETHKRYMRACLKEALRLWHVVPSNLRRTDRDHVVGGYHI…
	CYP315A1	MYLTKNLSVLKFPRKTPRFLSISSKKLALTIHDIPRPKGLPLIGTKLEFIAAGSGTKIHEYVDNRHKQLGPIFCEKLGGSTDLVFVSDPMLIKVLFLSLEGKYPVHILPEPWVLYEKLYGSKRGLFFMNGNEWLQNRRIMNKHLLREGSEKLFEIPVKTTVQKFVQRWKVEANKSEFVPHLESEFYRLSIDVIMAVLLGNNPQLNTDKHYDTLLTTFSEAVKRIFQTTTKLYGIPVNICQKLDLKVWRDFKESVDVSLSLAHKLVTEIMQGEKSNGLINILREENMKDEIVKKIIGDFVIAAGDTTAYTTLWSLLLLSRNENAVKDLIFNENTSGTNVIKEAMRLYPVAPFLTRILPKDCVLGSYTFNKGTPIIASIYTSGRDEQNFSRAKEFLPYRWD…
	CYP428A1	MSKSSFLIRQSLFHRQRRHITGSSSQQTSTSPQRSNMAAPRLVESVRPFNEIPGPIALPMLRHSAHVLPRIGSYHHTVGLGLLEGLQDKYGDLVRLAKASRTRPVLYVFDPEMMREVYESYATEPPRFEKSPLCQHRKGVGHCPVHGDETKAIWAAIRALLQDGNLLRSYDKVFDDIAADATRRKPEKTSLDDEIHDLCSLSKRSLEELTPAERLVRCSREIADGSYQVRSEATLNRENPTFNSALKTFDRHFSLTEHFLIQALHSLSSCELRPEQVLLDKLRPLQRRILPLAADILLAGVDPLAQTAIHMFYQLSLHAARQQRAHDEVHWSIASRDAGADTPELPYVAACAREAMRLHPATGGVVRRNREAIVVGGYEIPAGEV
	CYP314A1	MWGKRGIGRVVSSTPPPLVDWSCVPTLVLAVILVVVAATALAARTADGKQSTRLPGPQPLPFLGTRWLFWSRYKMNKLHEAYEDMFRRYGPVFVETTPGGAAVVSIAERAALEAVLRAPAKRPYRPPTEIVQTYRRSRPDRYASTGLVNEQGEKWHHLRRHLTAELTSPNTMQGFLPELNNICDDFLDLLDSCRRSDGTVTGFDQLTNRMGLESVCGLMLGSRLGFLERWMSGRAATLAAAVKAHFRAQRDSYYGAPLWKFAPTTLYRTFVKSEETIHTIVSELMEEAKIKKQGSANDDGMREIFLRILENPALDNRDKKAAVIDFITAGIETLANSLVFLLYLLSGRPDWQRTIRAQLPSCSTLTAEDLANAPSVHAAIYEAFRLLPTAPFLARLLDA…
	CYP301A1	MGRSLRTFAAYTQPFVAKNARHSSTGCPFSKRQQSQIAPTAELNEEIFANAKPYSEVPGPKPIPILGNTWRMVPIIGQFDISEFAKVTQHFLDRYGRIVRLGGLIGRPDLLFVYDADEIERMYRREGPTPFRPAMPCLVKYKSEVRKDFFGELPGVVGVIWRTHEMKMAIYRTSSIMISIDGIGRVALDVRLGCLSSDLNANSEPQRIIDAAKFALRNVAVLELKAPYWRYIPTPLWTKYVNNMNFFVELCSRYINEALERLKTKKVTSENDLSLLERVLRSEGDPKIATIMALDLILVGIDTISMAVCSILYQTATRLKQQEKMAEEIRRVLPDPSKPITYADLDKLHYTKAFVREVFRTLQEDDVICGYHIPKGVQVVFPTIVTGNMAQFVSDPEEF…
	CYP301B1	SKPVKSCPVQGSRARSTHAAIDTSLFDISPSVKSWDQVPGPRPLPFLGNTWRFTPYIGTASPGQHLERKYLEWLSALVLPHSTRCLSQKLLMLLFKALGLIALDTRLNCFDAPEDSESMRLIHAVQTFFLSVGELELRAPWWRLYPTKMFRQYVAALDTILSVTLRHVEKALKECEANNASKSLLQDLVTAAGPRVAAVAALDLFLVGIDTTSNAVASTLYQLSLRPNVQERLYEEINKVLQDRPMKPGDVNQMPYLKACVKEVMRMYPVVIGNGRQLTKDTTQVIFQHYVMGNSDDYFSEASEFRPERWMSRSPSQKHHAFASLPFGYGKRMCLGRRFAELEIHTVICKMVQAFKMEYHHEPMDYHIHPMYTPNGPIRLKMMDR
	CYP6AB105	MYLKYPTEKVVGFFRSTQPELIIRDPEIAKRILMTDFDYFWQRGITPHKTVFEPLNQNLFFADGDIWKLLRQRMTPAFTSGKLKAMFPLIVERAERLKVRALAAADEGKSIDARDLMARFTTDFIGACGFGLDTDTLNDENSAFRKLGIKIFKFGAKDILKGIAKELFPEIFKNLKVWVRLEGDMNDLVGEILRQRNYKPIGRNDFIDLMLECKQKGTMVGESIEKRKPDGTPERVSLEFNDGLIGAQVFVFFAAGFETSSSATSFTLHELAFNQDVQKKAQNEIDRVLAKHNGQLSYDAIKEMTYLEWVFKEGLRMFPSLGFLLRRSTRPYTIPELGVTIDDNVKVLIPLQSLHNDPKYFPEPEEFRPERFDPEEFDSNNKYVYLPFGEGPRACIGAR…
	CYP304F1	MIAAIVFAVLIPLLIAYCYKNAYSRPPNFPPGPPSLPVYGAFWIVLAHGFNDLASAFRKLGEKYNTNIIGLFMGPVPTVVVNDSKLIKEVLNREELDGRMDIILFRLRSYWKKLGIFFTDGYFWHVQRRFSLRYLRDYGFGRRDHTLESVMEGEIKEMLDLRTGGPKYPAEKEIVKGDLVYMPYFFSVPFINGMVQVLSRSTLPRSEYHALWALSRGTVLFQRSSTDMGGALSLTPWLKDVLPNYSGYKPLVKGNQYLLDFYRTLVEDTLKTHDETYDRHFLDMYFTKMKQEMKEADRTTYSVDQLVLTCTDYTFPAASAVEFVLAMLVERLLLQPEIQDKIHEEIDRVVGRDRLPTLDDRVNMPYLEACIREQMRVDTVVPLGVPHRAMTDTKIGSYD…
	CYP4M58	MWLYLLSCILLLCVLHVLLNHNERARMIKKIPGPKDDFIIGNAWRVTCSSVELMKLGRTFAKKWNGIYRIWIYPFAAVAIYNPKDIEVIMSNVKYNEKSLIYSIVKPWLNDGDKWQQRRKILTPAFHFNILRQFFVMIEENSQRLLEKLSETSGEATDIVPILSEFTLNSISETAMGTPLREYPTSIVKSYKKAIYDLGNIFFNRFIKGHDTTASGLTMLLMLLANHTNIQNRIVSELNETFGDSTRAVSMEDLPKLKYLERCIKESLRIYPPVHFISRKLNTTTVLSQKFAMMEMKIAVANILREFKLEPVTKPSDI
	CYP4M8	MLFYLVGVVVFLCALHLLLNYNEKARMLRKIPGPEDSFILGNAPALMLSPVDLIKKGRELAKDSPGIYRLWMFPVGAVNIYTPDDIEIIVSGMKYHEKSGIYKLLAPWLGEGLLLSKGTFSEIIEENGKRLVKRLQSEAGRPLDLVPLISEYTLNIICETAMGTQLIDGSSATRSYKDAIYGLGHVVYQRFIKVFYFVDFIFKLTPLSKVHDKYLNLVHSFTKSVIKERKEYINKYGMKFDEPAEDNEDSFVYKKKKKTAMLDLLISAQKENLIDEIGLQEEVDTFMFEGHDTTATGLTFCFMILANHKEVQDKIVAELNEIFGDSKRAVNMDDLPKMKYLERNFEVPAGTFCHIHIYDLHRRPELFKNPDAFDPDRFLPENSVGRHPYAYIPFSAGPR…
	CYP6AE98	MIATLLLPFTLFLIAYSLYLFTRRKFTYWEKRKIPHLPPTAIVGNYLKFITQKENLAENTRKLCEQFPDAPLIGTYFGTEPALIVQDPELIKLVGTKDFHIFSGRELSEFSDKEMIMRNVFSSYGDRWKALRQNLSPIFSSSKMKSMFPLIGKCSFVFEDMLDREIQKSSVLDMRKTNLVGDGLKNSKSETGSKVILEVDDDFLLAQCILFFVAGFETSSTTLTFTLFELAKHPEKQAKAIEDVDAYLRRHQNKLEYECVAEVPYLEACVDEALRLYPVLGVLTREPLEDYVFPSGMKIEKGIRVHLPLCMLHNNPDYFPDPKEYRPERFYGEEKRKIKPHTYMPFGEGPRTCLGMRFARMQMAAGLITLLKKYRVELAPGMKTVLEFNPRSDITQPTE…
	CYP6AE97	MLQKQNLGDNTLELCKTFPDAPLIGAYYGTEPSLIVQDPELIKLVTTKDFYYFSGREISNYVHKEMFTRNLFFNYGDKWKALRQNLSPIFSSSKMKNMFPLINKCSFVFEDMLDREIGNSSVLDVRTILARYTMDCICSCAFGVETQTMEKTENNVFKTMGDLTVDFRPLPAIKNMVRTMWPSIFYGLGFKVMSTDVDNFFNKLLTDIFENRNYKPTSRNDFIDYMLKLKNNNLVGDSIMNLKSEAGSKVNLEIDQEFLLSQCVLFFVAGFETSSTTLTFTLFELAKNPEKQAKAIEEVDAYLRRHENKLKYECVAEMSYLEACVDEALRLYPVLGVVGRETSEDYVFPSGLKIEKGIRVHLPLYKLHYNPDYFPDPKEYRPERFYGEEKRNIKPYTYM…
	CYP6AE99	MPFGEGPRTCLGIESLTEVSSLKPADRENLGESTRKLCAKFPNAPLIGAYYGTEPSLIVQDPELIKLITTKDFHIFNGREVSEHTHKEMLTRNLFFTYGDRWKALRQNLSPIFSSSKMKSMFSLIGKCSFVFEDMLDREIGSSSVIDVRTILARFTMDCICTCAFGVDAQTMVKTENNVFKHMGDVIMDASSTAALKNIFRAIWPSIFYGSGFRPSNRNDFIDFMLKMKKNNLVGDSLKNSNPETVSKVTVEIDDEFLVANCVLFFVAGYDTSSTELSFTLFELAKNPEKQAKVIEEVDAYLRRHDNKLEYECVAEVPYLEACVDEAMRLYPVLGVVSREAQENYMFPSGLTIEKGMRVHIPLYRLHTNPDFFPDPLEYRPERFYGEEKRNIKPYTYMP…
	CYP6AE100	MIGTLLTITLFILAYSLYLFTRRKFTYWKKKNIPHVPPTTIFGNYSKVLLLQQTFGDNTRKLCETFPEAPLIGAYYGTEPSLIVQDPELIKLVTTRDFYYFSGREISNHAEDEPLLRNLFSSYGDKWKALRQFLSPIFSSSKMKSMFPLIVKCSLQFEDMLEREFETSSVLDMKSIMSRFTMDCISSCSFGIETLTMVKTENNIFRTLGDLMSAPSAVLAMKNLIRTIWPSIFYGLGFKLKKNNLVGDGFKNSESSAGSKFNLEVDDEFLIAQCALFFGAGYESSSITLSWTLFELAKNPEKQAKAIQEVDAYLHRHDNKLEYECVAETSYLQACVDEAMRLYPVAGVLHREVTEDYVFPSGLKIEKGLRVHLPLYKLHYNPEYFPEPKKYRPERFYGD…
	CYP6AE101	MLLKQNLGDNTLELCETFPDAPLIGAYYGTEPSLIVQDPELIKLVTTKDFYYFSGREISNHSEDEPLLRNLFSTYGDKWKAIRQNLSPIFSSSKIKTMFPLIGKCSLVFEDMLDREIEKSSVLEVRTIMSRFTMGCICSCAFGVETLTMVKTENNVFKIIGDVIMDFSAKQATKMTVRAIWPSIFYGLGFRLLPKDVENFFKKLLTDIFESRNYQPTSRNDFVDYLLKLQKNDLVGEGMKDLNSDSGPKLTVKVDEEFLLAHCVLFFSAGFETSSTSLTFALFELAKNPEKQDRAIEDVDAYLRRHENKLEYECVAEVPYLEACVDEAMRLYPVLGVVTRETSADYVFPSGLKIEKGIRVHLPLYKLHYNPDYFPDPKKYRPERFYGDEKRNIKPYTYM…
	CYP6AE102	MAALLVFVSLLTVLISLLYYISQRKFGYWEKRNVPYVKPLPLLGNYAKYMLQKQYPGQMLQELCKRFPDRSYFGAFFGTEPVLVVNSPEVVKDVFTKDFYYFNGREISDYVENEITTRNLFFASGDQWKVVRQNLTALFSSSKMKKMFYLLEKCNHSLEDMLTYETSKNNVIEARDLGARYTMDCICSCAFGVDSMAMGKEPNNVFKTMAEQIFEASNTRGLKLILRAAWPSLFYGMKMQVFPATIDIFFSKLLKGVFESRNHKPSPRNDFVDLVLTFKNEENLIGDSISNSKTGKDTKIKLKVDDDLLVAQCILFFAAGFETSATTISFTLYELAKHPAVQEKVIAEIDEYVARQKNKLEYECVNDLPYLDAAVYETLRMYPIFGILTREVMDDYQFA…
	CYP6AE103	MAALLLFVSLLTVLISLLYYISQRKFGYWEKRNVPYVKPLPLLGNYAKYMLQKQYPGQMLQELCKRFPDRSYFGAFFGTEPVLVVNSPEVVKDVFTKDFYYFNGREISDHVENEIITRNLFFASGDKWKVVRQNLTALFSSSKMKKMFYLLEKCNHSLEDMLTYETSKNNVIEARDLGARYTMDCICSCAFGVDSMVMGKETNNVFKTMAEQIFEASNTRGLKMILRAAWPSLFYGMKMQLFPSTIDEFFSKLLKGVFESRNHKPSPRNDFVDLVLTFKNEENLIGDSISNSKTGKDTKIKLKVDDDLLVAQCILFFAAGFETSATTISFTLFELAKNPAVQEKVIAEIDEYVARQKNKLEYECVNDLPYLDAAVYETLRMYPIFGILTREVMDDYQFA…
	CYP6AE104-partial	MGALLVIATLLSTICFLIYLISIKKFNYWKNKNVPHVKPWPIFGNYANYLLLKEYPGQLLQKLCLKFPGQPYFGAYYGTEPTLIVHSPEIIKDVFTKDYYYFNGREISNYVKCEVMTQNLFFSSGDRWKCIMFFAAGFDTSSATISYTLYELAKNQKAQVKAQQEVDEFLRRHKNKLNYECVNELPYLDACLYEALRLYPLFGILTREVMEDYEFSTGLRIFFPEPQKYKPERFLAENKQNIKQYTFFPYGEGPRICIGKRFARMQVLSGLITILKKYKVELADGMPKTLKFDPRTLLTQPSGHGIDLKFTVREGWEDRKLVRV
	CYP6AE105P	MGKEGNNIFRVMATRIFEASNTRGFKMIMRAVWPAIFYGMKMQLFPSSIDKFFSKLLKGVFESRNHKPSPRNDFVDLVLTFKEDDYLVGDSITNSKTGRNDKIHLKVDDDLLVAQCIMFFAAGFETSATTISFTLYELAKNQKAQSRVIEEIDEYCTRRNNKLVYECINELPYLDAAVYETLRMYPIFGVLTREVMDDYEFSTGLRVDKGVRVHIPIYHIHYNPDYFPDPEEYKPERFLPENKKDVKPYTFFPYGEGPRICIGSRFAKMQVMSGLVTILKEYRVELDENMPQSLKLDPRTFLIAPRQQGLNIKFTKREGWEQRRWVRI
	CYP6AE106	MAALLVFVSLLAILITLIYFISKKKFSYWEKKNVPFIKPLPILGNYAKFMLLKQYPGQLLQELCRKFPNQPYFGAFYGTEPVLVVQSPEIVKDVLTKDFYYFNGREASHYASKEIATNNLFFASNDMWKVTRQNLTALFSSAKMKKMFYLIENCSHALEDMLEYGTTTRNNVIESRDLGARYTMDCICSCAFGIESKAMGYEANNIFRIMATQIFEASNTRGLKTVLRAVWPAIFYGMKMQLFPSSIDEFFSKLLKGVFESRNHKPSHRNDFVDLVLTLKNDDYLVGDSIANSKTGKNEKVRIKVDDELLVAQCILFFGAGFETSSTTISFTLYELAKNQKVQNRVIEEIDEYCKRRNNKLVYECINELPYLSAAMYETLRMYPIFGVLTREVMDDYEF…
	CYP6AE107	MNALLVLASLITAIVYLVYYVSTKKYNYWKNKNVPYIKPLPILGNYGDYILQKQFQGVSLQHLCLKFSTQPYFGIFFGTEPVLVVQNPDIIKDVLTKDFYYFNGREITNYAHKEIITRNLFFSGGEKWKVVRQNLTPLFSSSKMKNMFHLIEKCGHYFESMLAEEFEISDVIETRDICARYTMDSICSCAFGVDANAMGKNPDNPFRFMADELFLPTTYRGFKINPEIQRKAMEEVDEFLRRHENKLNYECVNELPYLKACIYETLRRYPVIGVLTREVMDTYQFSTGLRVDKGVRVHIPVYHMHHNPDYFPEPEKYKPERFLPENKNDLKPYTYFPFGEGPRICIGARFAKMQTLVGLMVVLKSYKVELGKGMPEDVDLDPRTFLTQPRTGIHLKYTK…
	CYP6AE108P	MTTYLWRSVSCFCGRLRDIATTISFTLYELAKNQKAQSRVIEEIDEYCTRRNNKLVYECINELPYLDAAVYETLRMYPIFGVLTREVMDDYEFSTGLRVDKGVRVHIPIYHIHYNPDYFPDPEEYKPERFLPENKKDVKPYTFFPYGEGPRICIGSRFAKMQVMSGLVTILKEYRVELDENMPQSLKLDPRTFLIAPRQQALTLSSRNVKGGNREDGSASKIFMND
	CYP6AE109	MIATLLLITLSVIAYSVYHFSRRKFTYWEKRNVPHLKPKTIFGNYENFILQKENLGENTRKLCETFPDAPLIGAYYGTEPSLIVQDPELIKLVTTKDFYYFSGREVSEHSHKEMFTRNLFFTYGDRWKALRQNLSPIFSSSKMKQMFHLIDNCSFVLENMLDQEAKTSKGLDVKIILTRYTMDCICSSAFGVEAQAMVNTENNVFNHMGELVTESSPAAAFRNVCKTIWPSLFYGLGFTVFSKEIDDFFNKLLTQIFNSRNYEPTTRNDFIDYMLKMKKNKLVGDSLNNLKSDSASKVTLDIDDEFLIAQCVLFFVAGFETTSTTLMFTLFELAKNPVKQVKAIEEVDEYLRRHGNKLKYECVAESLYLDACVDETLRLYPVLGMVGRETVQDYVFPSG…
	CYP6B69	MPFTLALLIIACSLVYYYCTRTFNFWKDKNVKGPNPIPLFGNFIEVFLRRKHVGILYNDLYKEYKNEKVVGLFRMISPTLLVRDLDIVKQVLIKDFELLPDRGLYYSKEALGDNLFHATYDVSKTIRKHVTSIFTSRKFRNNFDLFVDRADKFLDYLENKTMKKSEFEVLPIFRKYAVDSIMIAFCGLDVKAYDDDNPLCDFMDAQIQTPTYFIEMELLFPGTLAKWNLSAFPKSVREFCQQVVRTGISNVAKEDSLNVKNNLIDVIAELLKDNKVAKEGEDSFMQVTEDMLIGQVFIFYFAGYGNNSLVTTYALYHLAQNPEVQDKLIAEIDEVLEKYDGKLTYDAFREMKYLQMVFDETIRMHPLTNSITRNVRTDVKIEGMDLVIPKDTIVVVSPY…
	CYP6B70	MDVYYIPLVVIALFYAVYYFFTRNFNYWKKRNVRGPEPVPFFGNMKESALRQKNVGIVIHEIYKNFPEEKVVGIYRMTTPSLLIRDLEILKHIMIKDFDLFADRGVEFSKQGLGQNLFHADGDTWRALRGRFTPIFTSGKLKHMFGIMHDRADIFMDYVSQKAEKNIEFEIHSLIQKYTVSVISACAFGLDLQNLDTKLEDLELIDKLVLEPNFGLELDMMFPGLLKKIGISVLPKPVGVFFNKLVQNIMSVRGGKPSNRNDFMDLILQLREMGNVKNPFGDMKPSLEITDDVIAAQAFVFYVAGYETSATTASYMLYQLALNQDVQDKLIAEIDAVTEANNGEITYESLKEMKYMHKVSDETLRMYSIVEPLQRKCTVDYKIPGTDLTIEKDTILLVS…
	CYP6B71	MAFHYIPLTVIALCAALYFYFTRTFNYWKKRNVPGPEPTAFFGNFKESALRRKNVGVVVQELYNSFPNEKVIGIYRMTTPSLLIRDLDVIKHIMIKDFELFADRGLEFSKKGLGQNLFHADGDTWRGLRNRFTPIFTSGKLKRMYYLMHDRAEKFIAFLQREAEKSPEFEVHSLVQKFTVSTITACAFGLDINTLEEKFEALELIDKMVLEANFSLELDMMYPGILKKLGISIFPGKVLSFFKVLVNNVINMRNGKPTDRNDFMDLMLGLREMGTVTSNKLGSADTSVDITDDVVAAQAFVFYVGGYETSATTVSYLLYQLALNQDIQDKLVKEIDEELKQSNGEVTYDCLMNMKYLNKVFDETLRMYSIVEPLQRKATVDYKIPGTDLTVEKGTMMII…
	CYP6B72	MSLYYIPLTVIALCAALYFYFTRTFNYWKKRNVPGPEPTALFGNFKESALRRKNIGVVVQELYNSFPNEKVVGIYRMTTPSLLIRDLDVIKHIMIKDFELFADRGVEFSKKGLGQNLFHADGDTWRGLRNRFTPIFTSGKLKRMYYLMHERADKFISFLQREIEKSPEFEIHGLVQKFTVSTITACAFGLDINTLDEKVEALEIIDKLVLEANFGLELDMMYPGILKKLGISIFPGKVLSFFKVLVNNVINMRNGKPTDRNDFMDLMLGLREMGTVTSNKLGSADTSVDITDDVVAAQAFVFYVGGYETSATTVSYLLYQLALNQDIQDKLVKEIDEELKQSNGEVTYDCLMNMKYLNKVFDETLRMYSIVEPLQRKATVDYKIPGTDVTIEKDTILLV…
	CYP6B73	MSVTDSFFDKAQSDREKIAHVKKFLNVYIELSHTLNETLYIVKYQVMIAFAWFINFLSFVIATCGPSIFLEMAIDDLEEIQRTLTEQLLYYKERELKLVIFDALRYTDATKTMYSLWNGFPLGVNLILCFFSVCSTPSAARGLSDCKMEIYYTPIVIIALIYALYYYFTRTFNYWKERNVRGPETTVFFGNIKESALRQKNVGVLMQEIYDMFPDEKVVGLYRMTTPSLLIRDLDIIKNIMIRDFELFTDRGVEFSKKGFGENLFHADGDTWRALRSRFTPMFTTGKLKHMFPIMTERGDFFMKYVNKMAEKNPEFEVHSLIQKYTVSAVCSCAFGLELQTLENKFDDLELIEKLVLAPNFSFEIDMMYPGILKKLGYSAIPKEVQVFFNNLVQSVINI…
	CYP6AB106	MLTVVLALSALLALYLYGTRTFRYWQDRGIKHDPPLPYLGTNRQQYFMKKSMTQMAVEAYLKHPNEKVVGFFRSTRPELIIRDPDIVKRVLLTDFQYFYPRGLNTHKTVIEPLLRNLFFADGDLWRLLRQRMTPAFTSGKLKAMFPLIVERAERLQTRALAAAAAGRPLDARDLMARYTTDFIGACGFGLDADSLNDEDSEFRKLGRSIFHIRVKDAIVAMLKEMFPETFKHLKYTSLTEQPMLDLVAAILKQRNYEPSGRNDFIDLMLECKKKGQMVVESIEKLKPDGTPELATMELSDELIAAQVFVFFAAGFETSSSATSFTLHQLAFHPEIQKKVQQEIDAVLAKHNNQLSFDAIKEMTYLECAFKEAMRIFPPLGFLMRECARTYTIPEVGITI…
	CYP6AB1	MSAETYWKYPNERFVGYYRGSIPELVIRDPDLVKQIITTDFSYFYSRGLSPAHKVIEPLLRNLFFADGDLWRLLRQRMTPAFTSGKLKAMFPLIVERAERLQTRALAAAAAGRPLDARDLMARYTTDFIGACGFGLDADSLNDEDSEFRKLGKKIFDITLKRTIVVFFKTIFPDVFKNMKFLGQDLEDDIVALVKQIQKQRNFKPSGRNDFIDFLMEWQQRGKIVVESLEQTNPDGSPKPVELEMDDVLVAAQAFIFFAAGFETSSSATSFTLHQLAYHPEVQKKAQDDIDRVLKKHNNRLSYEAIKEMTYLDWVLQEGMRIFPSSGMLLRQCVRPYTIPGTDITIDKGVKINIPLVALHNDPQYFDNPKEFRPERFSPEEVGKRHKFVYLPFGDGPRS…
	CYP366A1	MPLWVYIVCVMLICACAALWSYERRVRSVFKGIPTLPPLPIIGNIHQVLGDGRVLFRLLKSVAEICDTNNSPCIAWLGLYPIFITHDPEDVKVITNSCVEKPFLYNFGRVWLGHGLVTAPAAVWKHNIKKLSGTFTSSVVDEMFMLSPETALGVSKISESIVTSEYYEAFNRCLELLTARGLNVFLYPDVIYRLTPAHREIKRCVAIIHNVSETVMKKRKLEREEKKKRNKTKNENNGEEPRFKAFLDILMELSELDPSLTEQQIKSEVDTIIVGGQETVASTILFTLLMIGCKPGIQNKMYDE
	CYP307A2	MLSALFLITVFLIAVYKFYFKNTVTYKKINKYGENKTVVLKEAPGPTPLPIIGNLHLLGKHESTFQSFTALAKEYGDIFSLKLGATKCLVVNNLDLIREVLNQNALALCDWSNLQLRRRNLARRHCGPKQHTDNFARIGDVATFESIELIQTLKSITRNSDASINLKPILMTTAMNMFSHYMCNVRFDDNDEDFRRIVDHFDEIFWEINQGYALDFLPWLSPFYKKHLDKLSSWSQDIRSFILSRIVEKREMNLDVEGPEKDFLDGLLKVLHEDPTVDRNTIIFMLEDFLGGHSSVGNLVMLCLTAVARDPEVGKKVKAELDALTKGKRPVTLLDRRSLPYTEATVLECLRYASSPIVPHVATENAAISGYGVEKGTLVFINNYELNTSEEYWDEPEKF…
	CYP6AE110	MIAIFLPATLILIAYSAYLFTRRKFTYWKKRNIPHLPPTTIFGNYSKYMLFKQNMGENTLELCRKFPDAPVIGSYYGTEPALIVQDPELIKLVTTKDFFYFSGREVSSYSHKEMFTRNLFFTFGDRWKALRQNLSPIFSSSKMKNMFPLIKKCSFVFEDMLDQEVGKSNVLDVRTILARYTMDCICSCAFGVETKTMEKTENNVFKRMGDLVVNFTLFPAIKNIIRTTWPSIFYGLGLRTLSREVDVFFNKMLTQIFEDRNYQPTTRNDFIDYMLKLKQNNLVGVGLKGSKSEAAPIVSLEIDSEFLISQCALFFGAGFETSSTSLMWTLFELAKNPEKQAKAIEEVDKYLQKHGNTLDHECIAETSYLEACVDEALRLYPVLGVLTREATENYVLPTG…
	CYP6AB107	MIVIAIILICILLYIQGTKNFKYWEKKGIQYCKPTPFFGNSLRKYLRKISPTDQLAEIYRNFPGQKCVGCFESNHRSLVLRDPQLIKHVLVTDFLNFYPKGMNIHETEPLMNNLFSADGDLWKVLRQNMSVAFTTGKLKSMFPVLLDQAKSLDEVVLKCSENDQEIDVRDLMARYTTDAIAACGFGVDANSLNDETSIFRKLGKRIFNVNLRDYLVFMLKFLATDTFKYLNFFAPEVEKKIYGIVNSVKEARNGKPIGRKDFMDILLEMHNKKTIIGESLTKRDENGVPEKCEIVLNSELLTAQAFILFGAGYETSAASISFVLNQLAYNKEIQEKCQKEIDTVLEKHGKICYEAISEMKYLEMVFKEGLRMFPPIGFLIRKCAREYTFPDTNLTIDKG…
	CYP18A1	MITMLTNSIVGKLLWGLWQVMNYCVSRISLPLLLVAGAALLVLRLVALVQEMRKLPPGPWGPPVVGYLPFLGVRHKTFLELARNYGALFSARLGNQLTIVLSDYKLIREAFRREEFTGRPSTPLMHTLDGLGIINSEGRLWKSQRRFLHDKLREFGMTYMGNGKKIMEGRIKSEVYELISNLHRAEGAPIDANPLLALGVSNVICGITMSVRFSQGDIRFERLNHLIEEGMRLFGEVHYGEYVPLYNYLPGKAQAQERVAKNREEMFAFYQTLIDEHRETLDADNARDLIDVYLIEIEKAKNEGRAGELFEGRDHELQLKQILGDLFSAGMETIKSSLLWMLVFMLRNPEVKRRVQEELDAVVSRERLPTIEDMPNLPYTETTILETLRMSNIVPLATT…
	CYP306A1	MDFFFLWLVTFVAGFWIFKKLKQWQSLPPGPWGLPVVGYLPFLDRYQPHLTLTKLSKEYGPIYGIGMGSVYAVVLSDHKLVRDAFAKENFSGRAPLYLTHGIMRGNGIICAEGALWKDQRKLITTWLKSFGMSKHSVSREKLEKRIASGVYELLENVEKASGSPMDLPRMLSNSLGNVINEIIFGFKFPPEDKTWHWFRQIQEEGCHEMGVAGVVNFLPFIRFISSSTRKTMDILTRGQAQTHRLYASIIERRRRMLELTPPKEAAYALHDNLFNEHPEGHIKCVKYSKHALSNEEHYFDPKILIPSDGDCILDNFLAEQKRRFDKGEEAAKFMTDEQMLFLLADMFGAGLDTTSVTLSWFLLYMALYPDEQELVRKEILSVYPDDGEIDGSMLPYLSA…
	CYP332A15	MLTAITQSLLAVIIICLTAFYFFSKHRYGYWKKRGVPQVEEPVLFLGNLSFLMRKSFFDAVYDWTKKYKDEYFGMYFGWTPALIVNNSELAKHVLVKDYDSFQNRFSYSGLDDDPLGSLNLFSVKNPIWTQMRNEISPMFTSARLKGFANLMNSNSAELVRKVQTDFIDNNEPVDFKKLFLMYTSDTVAYTVFGIRVSALKEGMSPLWYITCNMLKWSFWRGLEFTMIFFMPVIAAIFKFKFFSKEATEYVKKLFWDVVNERKKTGLTNDTDLVNLLLKLKDNLKLPAESGTELADNLMLAQAAEKLYQEVSKALKESGKDILDYNELLELKYLTACIHETLRKYPPVQLLDRACNNTFKWKDLTIESGTPVYVNILGIHYDEEKYPQPDEWRPERFIN…
	CYP332A14	MYESDVTEKKSDYLGIYLSWKPTLLIQSKEYARKVLVTDSEYFQDRYSYAGLEEDPLGSLNLFSVKGKTWIKMRAGIMPMFTRMRLKQLTELINRNSMELVKKIQRDYLDTNTPIHLKSLFAMYTSDNVAFTVFGLRVSALKESTSPLWRITGPMAKWSFWRGVEFSTILFLPWLAKLIRLKFFSERATNYIRKLFYDVVERRKGTGQSSESDLVNQLLKLKDNLKLPAEPDSQLADDLMLAQAALFIFAAIGTSSTTICYCLHELAHNLEKQEKLFQEVDAAIKSSGKQILDFDELSNLKYLKSCILETLRKYPPVPFLDRICNKTYKLNDEVTIEKGTPVFVNVIGIHHSEDYFPEPGKWLPERFVETSDADNLDFTFLPFGGGPRNCMGFRYGLMQ…
	CYP332A16	MLLYVFQCAFYFFTCAVTVLYFFFRHKYGYWKKRGVSYEKPTMFVGNLSFLMRTSISEAFLALNQKNKRDYLGIYLSWKPTLIIQSKEYARQILVKDNDCFVDRYSYSGRAEDPLGSLNLFSLKSPVWKQMRADITPMFTTMRLKGLTELMNLNSVELVNKIQRDYIAHNKPVDVKTIFGMYTSDTVAFTVFGIRVSALKEGSSPLWTITGPMMEWTLKRGIEFSTILLIPFIAKTLRQKLFSQEGTDYVRKLFWNVAGERRKTGKSSDKDLVNHLLKLKDNLKLPAGSGAQFADDLMLAQAALFIFAAIETSSITLLHCLHELSHNPDKQEKLFNEIDKTMKSSGKEVLGYEELASIKYLTACIQGLNDKPLSNVSETLRKYPPVPFLDRLCNKTVKL…
	CYP337B15	MIDKVSLPEICKKVCDEHKADVIGTSTGTTKALLLTNPQDIQAVLTGDFQKFHSRGFLINQNDLLSDNLLFMNDIQKWKMIRQKLTPVFTSARLKNMFYIMDRCARDFVDLVDDNPLLKRKPYTLIYTYTTAAIGASVFGIDTQAKSTMDSPYVDMIWKALSPSLKGSLTLLTANLSPTLYKFLKLKFLGDHEEFFINVMKNVFESRKNDTEKRHDFIEICLELKKQGLLKDSTSGYELEPSDELLAAQAFFFFIAGADTSGNVMHFALVELASKPKMLARLHKEIDEVFEANKTDELAYEDLDKMQYLDMVVNESMRKYPPIGIIQRVCTRDSVLPSGVSVEKDVLCMVPVLAVHRDEKNFPNPEEFDPERFAAENVSDIKKYTYLPFGEGSRHCLGA…
	CYP337B16	MINKVSLPEICKKVCDEHKADVIGTSTGTVKILLLTNPQDIQAVLTGDFQKFHSRGFLINQNDLLSDNLLFMNDIQKWKMIRQKLTPVFTSARLKNMFYIMDRCARDFVDLVDDNPLLKRKPYTLIYTYTTAAIGASVFGIDTQAKSTMDSPYVDMIWKALSPSLKGSLTLLTANLSPTLYKFLKLKFLGDHEDFFINVMKNVFESRKNDTEKRHDFIEICLELKKQGLLKDSTSGYELEPSDELLAAQAFFFFIAGADTSGNVIHFALVELASKPKMLARLHKEIDEVFEANKTDELAYEDLDKMQYLDMVVSESMRKYPPIGIIQRVCTRDSVLPSGVSVEKDVLCMVPVLAVHRDEKNFPNPEEFDPERFAPENVSDIKKYTYLPFGEGNRHCLGA…
	CYP337B17	MFAVILLLVVCSVLLYWCLKTNNYWTKRNIIQVDDMMLKFLFSKHSMPEIAKDIYDKHDGRHIGSSLGSKPMLMLKNVEDIQAVLAGDFQSFHSRGLVLNSNDLLADNVLFMNDFQRWKLTRQKLTPVFTSSRLKNMFYIIEKCACDFVTFVEDNPQLRHKPFDMLYTYTTASIGASVFGIDTNTKNTMDSPFMDMSKKSIEPSLFQTVSVFLSDTFPTLFKLLRIRVFGEVEDFFISTVKKVMESRKHDSQKRHDFIEICLELKKQGTMQDLATGYELEPTDELLAAQAFFFFIAGADTSANTMHFTLTELASNPKILTKLHQEIDGILKNESDELTYNDIDKFQYLDKVLNEAMRKYPPIGVIQRLCTKETVLPSGVPIEKDVICMIPVYAMHRDEK…
	CYP6AE111	MFFYLLLTILTLIYFVSTRKYDYWKKRNVPHVKPTFMFGNYGDWILMKKFQGGVIQDLCKKFPNEKFIGAYFGTEPVLIPIDPEVIKLIVTKDFYYFNGRDLSEHSHKEPAARNLLISHGDNWKVLRQNMTPLFSTAKIKNMFHLIANCSYAFESMLDREIGMSAKVEAEDLTARYTIECIVSCAFGVDANTMSEEVADNPFKKLTQFVNPPKTIAPYVLLRSMWPSIFYGLGLKIVGKQIDFFNNLITNVMETRNYKPSGRNDFVDIIMTWKQSSKIVGDSVKNMKTGESLKVALDVNDNLLSAQCFLFFNAGFGTSSSTLSFTFYELAKNAVIQDKVLAEVDALMARHENKLIYDCVTELPYLEAVISEALRLHPILPMISREVMEDYTLPGGVQLS…
	CYP324A6	MYLLLLFTLVSVCVAWLYAKWMHMKSYWVNRGVPQGPVNPIFGSMRFLQQKNPGVWMRELYEQFKEFPYVGIWVFWRPGLVINSPELARQVLVKDADVFRNRLLRSGKRDPLGALNLLTVDDPLWSSIRRRLTSVFTASKLRGWHELYQSKVSDLVERIRTDKEKGVTVNLRSLFADYSTDIIGESSFGIQCQATKNSSGPLRAMTLEFEKYSTWRGMGWSSMFFVPEMVDIFGFSFWPQNTVDYFRKIFSMMVKERGGLDKEVDGKRDLLDALLKMRQDALKDNQGMDNMDLDILVSNAMILLQGGYDTSSAALMYICYELAYHPEYQQRLYEELLKAKKSLGEKEFEAADLAELPFLNAVFNETLRKYPIMGWLDRVALKDYRVDEKLTIKAGTVVY…
	CYP324A23	MFILLLSMVTVIFAVWVIIRWSKVKKYWKEKGVPHYSPNPIVGSLTFLQRENPSLWMRKLYNDFKGAPYVGIWLFWRPALVVNSPEIARRVLVKDADVFRNRFLSSGKTDPIGALNVFTVNEICTDYTTDVIGEAAFGITSNSLVSPDSIMRRVTREMMAFNVHRGLSWCSIFFIPELVDVFRLSFFPKDTMKLLRKIFQTMVAQRGGYENPIKEPRDLLEALERLYQEVLQAQNKSEDEYLNTASHPELTFLDAVIKETLRIFPPMGWLDRIASTDYKIDDNLTIPAGTPVYVNGVAMQVDPEYFPEPEVFKPERFLPENERNIIPYTYMPFGDGPRNCIGMRFAYQSLRQSLAHIILNFEIHALPGSTKPNNVHMEQKGLFFMPDEKLSVQFVPRAT…
	CYP324A6	MYLLLLFTLVSVCVAWLYAKWMHMKSYWVNRGVPQGPVNPIFGSMRFLQQKNPGVWMRELYEQFKEFPYVGIWVFWRPGLVINSPELARQVLVKDADVFRNRLLRSGKRDPLGALNLLTVDDPLWSSIRRRLTSVFTASKLRGWHELYQSKVSDLVERIRTDKEKGVTVNLRSLFADYSTDIIGESSFGIQCQATKNSSGPLRAMTLEFEKYSTWRGMGWSSMFFVPEMVDIFGFSFWPQNTVDYFRKIFSMMVKERGGLDKEVDGKRDLLDALLKMRQDALKDNQDMDLDILVSNAMILLQGGYDTSSAALMYICYELAYHPEYQQRLYEELLKAKKSLGEKEFEAADLAELPFLNAVFNETLRKYPIMGWLDRVALKDYRVDEKLTIKAGTVVYVNA…
	CYP4S33	MFLSIFLLVLTALIIWRLLDDEVSPLDKLPGPPRRPIIGSTLEFLNISPREMFLKIRQFTRDYGDRYVIKIFKRRILHINSVKDVEIVLSHSRNIKKSKPYTFLEAWLGTGLLLSSGAKWHKRRKILTPTFHFNILKNFAVVMEERARGLVERLRGLDGAEVSLMPVISDYTLSTICETAMGTQLDADKSKSTVAYKNAIMEIGGLLLARLTRVWLHNEYIFRKFPIGKQFEKYLHQVRSFADNVIMERKSTWKPGEGDFKEDDDSIGQKKRLAMLDLLLEAENKGEIDFEGIREEVNTFMFEGHDTTAMAIVFGLMLIADHQEVQDRLYEELQTILDDSDKAPSMADLNDMKYLEAVIKETLRLYPSVPFIAREITEDFMLGQRFAMLEMKCVLSGIC…
	CYP4S32	VVLSHTKNIKKSIVYRFLKDWLGDGLLLSTGAHWHARRKILTPTFHFNILKSFSIIMEEKVQDMVEMLKTKNGEALDVMPMVSDFTLFTICAAILKIGMTTLSRTTRFWLHNDTIFNLSSHGKQFAQYLETVRSFADKVIAERKEERAQKQSLQRQESVDGVGTKRRMAMLDLLLEAQEKGQIDIEGIRDEVNTFMFEGHDTTAMAITFGLMLLADHADVQERVFEEVQSILAGADRPVTLADLTEMKYMEAVIKEILRIYPSDLLVKKGSTIDVQIYLLHQNPELFPEPELFKPDRFLEGEARHPYAYVPFSAGPRNCIGQRFAIQEMKITLSEIVRNFKLVPKVKGFRPTLMADLVLRPVDPIN
	CYP365A1	MFGFKRSAFQLVVCLAWGLQYYTFGSLVLWYIFACGLSVAVVLAVTTYDHDYWRSRGVFSPPAWPVVGHILSVVMFKEQGGMCFKRIYDTYKDERYLGTHQFYQRTLVVRDPELIRRVCVNDFQHFTDRGFFFNKDVDPMAGSVLFLRGNEWKRLRTKISPIFSPNKLRGMFPLIENTAGEFVTRVKDLLSQPKDVTSKIVEENPVGPSNGVGQVSSVVDSEKLVGGYTADAIVPCAFGLKTDMVISANAFIIFLGGFETTSSTLAFLFLELAADQRVQEAMRQEIREVLEKHEGKITYELLQELVYMEMVIQETLRLYPPFPSIQRLCTKDYTIPGTTTVVERGTIYFENASAFIPERWSEGRPQPPPGKRFAMIQMKCCLLRLLQHVRISPAPLAAP…
	CYP324A22	MLFILICVVFLFLLSWFLVKWNRVRKFWRDRKVPHNPPHFIMGSLTFLQRQNPAVWMKQVYNEFKSPYVGMWVFWRQALVINCPDIARRVLVKDHDIFRNRFLSSGKTDPIGALNIFTVNDPLWSFLRRRLTTLFTAAKLRSLHGLLTTKCNDLVMRIKEDMYNEDTINLRTLCSDFTTDVIGEAAFGVTSETVKTGDSLMRRITKEFASFDLHRGLCWSSIFFYPELVDVFRFSLFPKDTVEVLRHIFRTIIEQRGGYEKEVKECRDLLDALLKLKQEAAADNEEISEDLLLAQAAIFLLGGFDTSGVTLTWTLYELAWNPSCQALRKFPSMGWLDRIASQDYQIHDQLTIPKGTVVYVNAVGMQQDEKHFPEPQLYKPDRFLPENERKINPYTFMPF…
	CYP340Q10	QRTTVSIFISIFSLSVISDPDAAQIVSRHCLEKHYIYEIAKPWLGNGLLTADIPTWKRNRKIMNLAFTQQVLNGFISVFNTQSRRLAKQFEDNPERTFEPHTMLLTNNLETICMVLQKRKAVIESKEYPTTDQFKPLMDTILELSIDKGLLTDRQMREELDTILFGGHDTSANTLTFTLMLLGSDLDRQEKVYKEIIEVLGPSDKDVEKDDLIKLVYLEKVIKENNYTFPSGTTFVIDVFGLHRHPIWGPDATIFRPERWDNLDSLPKEFSPFGVGRRTCIAHLLRRFKVISDITKLDLKLDSLLRPESGYEIKIELRQ
	CYP340BA1	YSLRSGGIVTVFIGTHPFYFLSDPNDSLQVANTCLSKPYVYNFAKELYNNGLNTAEESTWKRHRKLLNPAFNIQILNSLLDVFNDQAQRLVAQLATETGKNDIDLETHLSNHFIKTTCHTTLGLSPDDGAIIKDYASATQELYSIYLQRAIKFWLHLQCIFNRCSLKKKHDVIYKRKLQIKQDNKKLPKSCDQNSDKFRPLLDRMLDFTGTEDEFADDDIRDHVNTMVGAAYSTSAKSILFTLILVGCHDDVQSKLFKELYEVLGDEGRNLNKFDLQKLVYLEAVIKESLRLYPPVPRVARLNQSEVKLKNFTLRAGSTSVISLHAINRHPMWGADADLFRPERWLDPASLPDNPNAFASFSLGKRNCIGKIQAMMMMKISLAHILLKYSITSTSAELK…
	CYP340AG1	WKPHRKLLNPAFNLQVLNTFIAEFNVQAKDLVSLLEPKVGKEPFDVQPYLVNMSLKTVCRTSLGFREKDQRMIDTDYAHATEALFLVFGERIPKLWLHLPQLYNLSSLKKKEDNFGGITKRVINGVLNIFFWLKSVLGDEDRDVTKNDLPKLVYLEAVLKESLRLYPPVPFVARDVTSDIQIRNYKIPAGSSCFLALYGINRHPMWGADAEEFRPERWLDPDSLPINPNAFASFSIGKRVCLGRSYGMMAMKTTLAHILRRYRVFGDINKVVSRSDILMKPVTGQHIKLELR
	CYP340AD5	MIGLILFCLLSCLCVLWAWTVYVKGKHKLPPLYPGALPIIGHIYMLFGDGTSLWSTVKAIAVETMKQGGVTTVILGSSIYYFITDPDDALTAANSCLQKHFAYKFAKPWLGEGLITSSGEVWKRHRKLLTPAFSLPVMLNFLDIFNSQSRKLVKNLKVEISKGPFDHTVYLRNIALETFCLTAFGISGFEDKEFIKTYMHAVDKILTIVTQRFQNFWLQSDLIFRLSGLKKEHDELIKIVNDMSNKVIQKKKAERTNDVNAYAVKASGVRYKPFLDLLLELSEENALTDKEIREEVDTAIVTGFDTSSSLLSYIMILLGTHPEVQDKIYDEDVDKDDLNKLVYTEAVIKESLRIFTTGPVTLRYVDKEVKLKNYTMRADTQCVVLLFGVHREAAWGKDV…
	CYP340AZ1	MWKWEKSVHEFSLKNGGVAEILFGTYSIFVVTDPDDSLTIANSCYSKPSIYDFAKEMYNRGLVTAGESTWKSHRKLLNPSFRQQVLNSLLDIFSEQAETLVSNLEAEVGKHSFDVEPYLISHFINTASQTTLGLKTDDDSVITKHYGPATKGLFEIYLDRFVKPWLHVQCLYKISYLKQKQDALMKIISDISISIIKQRKLEQKQNRALNYEHLSTSDKFKPLLDQLLELADTKDAFTDDEIAEHLNTMVTAAYDTTAKALYFILILLGSHQDVQTRIFQELHEVLGAELAQDRNLNKHDLQGLVYLEAVIKESLRLYPPAPRIARYLNVDVKLKNYVLPAGSTGVISVHSINRHPMWGADADLFRPERWLDPASLPDNPNAFASFSLGRRNCIGKTYA…
	CYP9AJ1	MWWFIVLLVTCLFYYSRNRLKYFSSRGVCTLPPVPFLGNLTAVTLGRENFVEAIAAGYDAFKDQRYFGLYQYLVPTLIPRDPELIRQIMVRDFNSFADRGVHIDADCDPLFGRNLIMLTGSKWRSMRVSLSPAFSGARCRSMAPLMSESASAVVNFLREKISKPEAMDINTITMSYVNDVIASCAFGFAVDSLKDPDNCIFRLGKKAVVQDTTQVMKFFGYENMKNFLKVKIIPTKDADQFSQLFKSALKARRENLVQPRPDFIQILVDAAQGKAKSDSEGDANNNEYTKTAEKFTDDDLVAQAVLFYVAGYDTTANLIYYFLYEMATNPRVQQKLHEELDELPPEKEIEDLYEAVQGLEYLDMCVNEVLRLWPLVGSADRRSVATYDFGPTYPGSKDR…
	CYP9G28	MILEFFIFILTTLVVYYVYIYKKLHKYFEKKDVKYVPGVPIFGNVMKNTFLKNHFVDDLMNVYNAFPDERYIGFMEFTLPIILIRDPELIKSITVKDFEHFTDHREFFTEESDPLFAGSLLLMKGNKWRDMRTTLSPAFTASKMKLMMPFILENTNNILEFLEENQFKEVDVDDFVRRYTNDVIASAGFGLQVNSLKDKNNEFYKIGSTIFEFTLWQRLMLIYITMFPELSKKTKSRVFPDETYKFFKDIVVSTMEYRKKEKVERPDMIQLLMETPKAGFETSATALVMTIHELAINPGVQNKLYNEIKSFSEQKELTFDNLSELKYLDCAFNETLRKWSPAIILDRTCVKTYELPPSREGGKPCVLNPGDVVYNMVNCLQMDPKYFPDPEVYDPDRFS…
	CYP9G27	ERGVKYVPGIPLFGNALKSTFVKRHSLYDLLDVYAAFPDEKYVGYMELTVPIFLIRDPEIIKSITIKDFDHFTDHREFFTEDSDPLFAGSLFLMKGEKWREMRTTLSPAFTGSKMKYMLPSIVENSHNVLEYLSEHQSQEINVDDLVRRYTNDVIATAGFGLQVNSFKNKDNEFFEIGSNIFEFDFKQRIFMMFTSQFPSLAKKFGTRLFPDKTYNFFRNIVSSTMEYRKKEKVERPDMIQLLMETPKEWTAEEIIGQVFLFFAGGFETTASAIAISIHEMAINPDVEDKLYQEIKNFNEKNELTFDNINDLKYLDCVVNETLRKWSPAILMDRICTKTYELPPPREGGKPCVLNPGDIIYNMVNCLQLDPKYYSDPDVYDPDRFSDENKHKIKPFTHM…
	CYP9BS2	MRHFIEDMDAVYKAFPNEKYVAFFDGMKPILLIRDPDLMKMITIKDFNHFVNRKPFFPKEIEPLLGSSILSLEGDEWRKMRSRLTVAFSAAKIKGMWPSMRAVSYQLVDYLKDVADLMRRYNTDVIANTGMGLNVNSLKNPNNEFFTTGAQAVTFTIWRKIYYFFTIQFPVIAKLMQLLGLQLLPPAGTVFFRKVVSDSIAYRKTNNIIRHDFIHILMEISEDWTLDEITGQIYFAFLASYESTTSILSLCIHELALHPEIEEKLYQEVRAHQEKAGELTLEDLSELKYIDCVLSEISRKWSAAVMMDRVCTSGYVLPPPRDGGKGYEVKPGDVIYNVVNPIHMDPKYFSDPEVFDPTRFSEGNKQNIKSFTYMPFGMGPRNCLGMRFAIIKMKVLLYH…
	CYP9A100	MVNKMIIFLIWVAVLIAVLVLYLRQVYSRFSRYGVKFLKPVPLLGNMGRVLFRREHFAYDILNLFVGRFEFLNEMVMIRDIELIKKITVKDFEYFLDHRTLGSDSVFGRSLFFLKGQEWKDMRSTLSPAFTSSKIRLMIPFMVDVGDQMTETLKRKIKASKDGYLDVDCKDLTTRYSNDVIASCAFGLKVNSHTEVDNQFYTMGKEATNFNFRQMIMFFLLVNMPKVIKFMKWEMISEVPRTFFRNLVLDTMKDRELRHIIRPDMIHLLMEAKKGKLSHEDVQPNDAAAGFATVEESSVGQKELNRVWHDDDLIAQAVLFFVAGFESVSSTMSFLLYELAVNPDVQERLAQEVKEHDIKNGGKFDFTSIQNMTYMDMVVSELLRRWPPAVAMDRVCNRD…
	CYP9A99	MIIYLVGIVVFLVLVHYLSQVFSRFYRYGVKFDMPLPIIGNMADMLLRRKHIVDALQEIYNRYSKERFIVRYEFSNPIVIVHDIELVKKITVKDFEHFLDHRSIFSNSDSYFGRNLFSMKGQEWKDMRSTLSPAFTSSKIRLMVPFMVEVGDQMILALKQKLKDSKADTLEVDVKDMTTRFANDVVATCAFGLKVDSHHDPENSFYVMGKKISTFTFRQILTFFFLMNLPKLAKLMKLDFLTEEGKLFFKDLFMGTMRDREERNIIRPDMIHLLMEAKKGKLTHDEVKTNDTAAGFATVEESSVGQTKINRVWTDHDLIAQAVLFFIAGFETVSSGMSFLLYELAVNPDVQDRLAQEIKEVDAKNNGKIDFNSIQNMVYMDMVVSELLRMWPPGIALDR…
	CYP9A102	MIFYLLGAVVCLLLGQYLLQTSRFRRYGVKYVTPVPFFGNMAKILLRIKPNSELLIELYNKFSTERFYGRFELLSPVVEIRDLELVKKIAVKDFDNFPDRRKANADFDIGIVRSVAMLTGQDWKDMRSTLSPAFTSSKIRLMVPFMVEVGDQMLMALKEKVKNSKTSKIDINCKDLTARYANDVIATCAFGLKVNSHTDTNNEFFSNGKVLSTFSLRDNIIFMLSSSLPFVAKLFEFDSAKADRFFSKIFAHTIKDRQAENFIRPDLIHLLVEANKVWSEKDLVAQAVVFFIAGFETISSGMTFLMYEMGRNPDIQERLVQEIMETDAKNGGKLDFDSIQKMVYLDMVITEVLRLWPPVVNLDRLCVKDYNIGKPNKTADKDFIVSFDEQKNYLSGYGR…
	CYP9A8-fragment	GQDWKDMRSTLSPAFTSSKIRLMVPFMVEVGDQMIKALNKTNQKQKASKTKINAEDLTSRSANDMIATCDFFFKVDAHT
	CYP9A101	MIVTVTWLLVALSLVVLYLRRAYSKLERDQVNHLPIVPFFGHIFWVFFKKEHIVEAFMKSVNAFPDDRMVGHYDMVTPSVIVKDLETIKRITIKDFEHFVDRRRFIGKDDPMFGRGLLMLTGDEWKAMRSTMSPAFTSSKIRLMVPFMLEVGERMIQVLRERIKNSKEGYVDLELKDLATRYANDVIASCAFGLKVDSQSEDNTFYTMTKDITTFGLVRIIKVFLFRAFPSLCQALNIMISPPEVSDFFRTIILGTMKNREKDNIVRNDMINILMQVKKGQLTHEKEEADVDAGFATVEESSIGKKQHNFDWSDNDLVAQAALFLFAGFDTVSTTMAFIIHELAINTEAQEKLSKEIQEHDARHKGQADYNSIQSMQYLDMVVSEGLRLWPAGGFMDRK…
	CYP302A1	MMRVVGSVFLCLYYVHNFMGTGSYCNSMISLRDALRSGCASIKVINMLHFTFKQVHFASHVKSVRLSSKLKTSNSDHNTCSEKDIAMNFEEIPGPTSYPLIGTLHKYVPFFGEYNAEALDKNAWLNWRRYGSLARENPGVRLLHVFDPEDIETVFRQDHRYPARRSHVAMLHYRLSKPNVYNTGGLLSTNGPEWWRLRSTLQKNFTSPQSVKSHISSTDIVVQEFLEWIKKRNVSHHEDFLPYLNRLNLEVIGTVAFNERFHGFSEQEQDRKSRSSKIIEAAFGSNSGIMKLDKGFLWRLFKTPLYRKLVNSQEYLEKVSWNILLERANLFVSDKDNDNSLLASFLKQSNLDLKDILGMMVDILMAAIDTTSYATSFALYHISRNPEVQKKIFYEIFEH…
	CYP341A23	MFVWLLLFVPVLSVLTFVYRRRNMYRLASKIPAPDDESRLFGVAHKVFGNTEEIMTTLQELSFDAMKNNGIVRAWLGPILYFILVDPVDLEMVLKTCMEKDDLHRFLRKLTGNGGIFAPVSIWRRRRKVVVPVFSPKIVEGFVNVFAERSEVMAKNLTNYSGTGKFSVWPMLSSYTLDSVCETTIGVKLNAQAESESPFLKAMAVVLHLICERIFHLWLQPDWMYKFFPQYKVHQKSLATLHNFTDEVIRKKREELRQEKESKTEVDFEYNLGAYKNKTFLDLLIHMSGGENGFTNLELREEVMTLTVAGTDTLYDVFGDSDRSCEKEDLLKLKYLERVVKESLRLFPPVPLIIRKVLQDTKLRYQYALMSVKTALSTLLRRYRIVDELEGNSTPHIRV…
	CYP6AN32	MMLLLLALAVLALSYRYSTKNHDYWRKRNIKHEKPIPIFGTSFINKIGRKSFSEITTELYKKYSDEPVVGLFDGTTPELIIQDLDIVRRIINVDFAYFYLRGLGRNPKIEPEFYNLFHIEGDGWKLIRQRLNPAFTPAKLKNMFPLVVKCGEKLQIVGEEVVNRGGECDVRNLMARFTMEFIGACGFGIEMDTINNEHSSFIELGNKWFRPNFRKSLLTALYDLFPDTRTIVQKLLKDSQIIVSLTELLKNIRAERNFKPIGRNDFIDLLLELEGKGKMTGESIEKRNQDGKPEQVEMEMDLTCMAAQVLLFFTAGFETSSSTTSFTLHQLAYHPEEQQKIQKEIDMVLNKYNNKLCYDSISEMKALSNGFKEAMRLFPSLGTLHRVCARKYTIPGLNV…
	CYP6AN31	MIIYLVIPIVLVLLYKYVTRNHDYWEKRNVKYEKPISIFGTNYENVVAKKSIIEISIEIYNKYPNEPVVGLLRGTTPELVVRDLEIVRKILNVDFAHFYPRGTGRDPKLEPLFYNLFHVEGDLWKLLRQRLTPTFTTAKLKNMFPLVVKCAEKVQIVGEDIVNRGGECDVRDLMARFTMEFIGACGFGIEMDTINDEQSLFKQLGNKIFRPYFRKQAINALCDLFPDLQTVLQKLLRESDIIDAVTEILEKIREQRNYKPIGRNDFIDLLLELEGKGKIIGDSIEKNKADGTPEQVEMEMDLTYMAAQVFVFFAAGFETSSSATSFMLHQLAYHPEEQKKIQEEIDRVLSKYNNKLCYDSISEMTALSNGFKESLRIFPSLGALHRKCARRYTIPELNL…
	CYP6AN30	MIYLFALIVLVLLYKYTTKNHEYWAKRNVKYEKPIPIFGTDYRNVVGQKSITEISTEVYKKYPKEPVVGLLRGTTPELVVRDLEIVRRILSVDFAYFYPRGLGRNPEVEPMFYNIFHADGDLWKLLRQRLTPTFTTAKLKNMFPLVVQCAEKLQIVGEEVVNRGGECDVRDLMARFTMEFIGACGFGIEMDTINDENSLFKAMGSKMFRPYFRKYLMIAMYDLFPDFRIVLQKLLRESDLIDAVTVIVKNIREQRNYKPIGRNDFIDLLLELEGKGKMTGESVERRNADGTPEQVEMEMDLTCMAAQVLVFFAAGFETSSSATSFMLHQIAYHPEEQEKIQAEIDRVLSKYNNKLCYDSISEMTALSNGFKEAMRLFPSLGTLHRVCARKYTIPGLNVT…
	CYP6AN29	MAKKSIIEMATEVYRKYPTEPLVGMIRGTTPELVVRDLEIVRRILNVDFAYFYPRGLGRNPEIEPDFYNLFHVDGDLWKLLRQRLTPTFTTAKLKNMFPLVVQCAEKLQIVGEDIVNRGGECDVRDLMARFTMEFIGACGFGIEMDTINDENSLFRKMGTRMFKPYFKRSLLIAAYDLFPHFRTVLQKLLRDLDLIDDVTVIVKNIREQRNYKPIGRNDFIDLLLELEGKGKITGDSIEKNKTDGKPEQVEMEMDLTRMAAQVLVFFAAGFETSSSATSILLHQLAYHPEEQEKIQKGIDRVMTKYNNKLCYDSISEMTALSNGFKEAMRIFPSLGTLHRVCARKYTIPGLNVALDPGVKIIVPLQAIQNDEKYFDNPSQFIPDRFNDPNVLRHKYSYM…
	CYP6AN28	MIYLLLPIVLLLLYKYFTKNHDYWEKRNVKYEKPIPIFGTNYENVIGKKSIIEKATEVYNKYPTEPVVGMFRGTTPELVVRDPEIARKILNVDFAYFYRRGLGKNPEIDPVYYNLFHVEGDLWKLLRQRLTPTFTTAKLKNMFPLIVNCAEKLRHVGEDIVNRGGECDVRDLMARFTVEFIGVCAFGIEMDTINNEHSLFKKLGVRIFKTDFRKYLVTALYDLFPDFRTIIQKLLSNSSSITAITEIFYNIRKQRNYKPIGRNDFIDLLLELEGKGKIIGDSIEKKNADGKPVQVEMEMNITYMAAQMFVFFAAGFETSSSATSFTLHQLAYHPEEQQKIQEEIDRVLSKYNNKLCYDSISEMTALSNGFKEAMRIFPSLGTLHRVCARKYTIPGLNVT…
	CYP341B9iii	MELHDVKNSIKALPVLGHSYCFIDCKSDSDRWNVLERFSREALKQGGVTTSWNLHRLYCIVADPVIAECIMKNCLEKDDSMKLSLALVGNGSAVADVPIWRPRRKVMVPTFSHKNLLNFEDIFSRQSMIMIEQLKKVADYGSLSLSKYIMAYAMDSVIQTKREEIAENNKLKIQDGDEDRFKTFLELMIESSGGDKGFNNTELREETVVLFTAGTDTSTLGSSFTCVLLARHPHIQEKVYQELKEVFGDTDRAVTAEDLPRLKYLEAVIKETLRLYPPAPNLLRKVDKDVILRYRYAMMSMKTVLATLLLRYRVLSVSKLDIGQPISLKFDIMLRASDDFQ
	CYP341B29P	MAGRMRYFQMFGREAIKNGGLTNLWLGEKYYVVVVDPVDLDVIMKASLEKDEIMRFARNFIGNGIIFAPLPIWRPRRKILAPTFSPKNLNNFVKIFSQQSSVMADKLQDEEGKGPCSVWKYLNTYAMDSVCETALGVKVNAQKNTEEPFMKAFEETCRLIAMRMVQPWLYPNAVYRLLPYHANFEECKRIVCGFIDKVRPNDINTFLELITEASGGDRGYSDEELQEETLVLVVAGTDTSAVGACFTICMLARHPDVQERACEELHEVFGDSDRPLTSEDLPRLKYLDAVVRETLRLYPPVPLIVRTVEKEIQLPSGVTLVPGCGVLVHIWGTHRNPQYWGDDADQFRPERFLETLKHPAAFIPFRYQYAMMSMKTAVATILRKYRISMPGSKQNGVNV…
	CYP341B9i	MLIQIILVFIVVWMCVLRYQKRNMVELSHKLPMTKYRPLPLIGHAYIFFGSDEVSADVKIAELILKSCLEKDDALKCLQMLTGNGSVFAPVKIWRPRRKVLAPTFSPKNLAQFVEIFSRQSSIMAEQLQSAAGTGAFSIWNYITTYTMDSVCESTLGVAVNSQKQIEQPFLKRFELHTQLDSARLVQPWFHSEAVYKITPTYKKHAKCRDYICEFVDQVRKVGSSQARK
	CYP341B9ii	KTFLELLIEGSSSNNGYSNVELREETLVLVLAGTDTSAVGAAFTLLMLAQHPNVQNKVYKELQGVFEDSYRAVTAEDLPRLKYLDAVIRETLRLYPPVPFIVRKVTNDVTLRKYGHLLGYQYAMMSMKTALATIVRRYRIIPSDEKYTSKEVRVSFDVMMKDVDNFRIQLAMR
	CYP339A1	MFLNQVRNIQPYMRLALASPPKRWYEKTVLQTSKPQENDLNIQQKARPTSLRMDDKDPVIREIYSAARVMPMMLTNKEPIVLPFDDVPGPRVLKYISSFRQYLSEMGTQLTVGALTVALNIGTYLNTKKPLKNLSTLFDEYGPVVRFVSPVGGDIVLINHPEHIQKVYTMEGDCPVRSTLDSLEKYRSEHRNVIHGGLYTAHGEEWNRQRAVVLGPLHRLVLFSKKFTMLDTELVYSQCDMSWLYHSLDKATDAIVKCESGLHLWKLFPTPAWTSLVKYCDSLDNLIGKHVLEAEQSMSFTSKEVSDKNSLINAMLMSEEKMSPEDISTIIMDMLLIGVNTITSSMSFLLYYLAKYQRAQKLLYKEINNVTTNLSVNDMAKIAEITPYLQACIKETLRL…
	CYP338A1	MFFESFLLNLAVICVLIIALIIDYVTKFFSYWYVRHVPYKSPSVPFFGSDYHRVLGVRSSTEEVNLLYSKYPNSKYVGRVKCRIPDLIVKDPDTVKRMLSTDFANFHSRGLCLDKSLDVCLRDNLFYADGEKWTLLREGYESLLSNMNCELESLSDCLPGTNDDANVQEILSKVLDKIFEDLLLGSGGGSVVKEMRSATQKRTLIERFKSYLKDIFPSLYITFGLSTVFGEPSSKTKANIEKSKILTQIKSLGVYQLGLKEKKKKSNSEVEFAFSMISSFITEGYIPCLNALTALIYELALNPEAQEKSRNSVSKDNRDEYLDVAIKESLRLHPPYSIISRQCTKMYHPEGGILIDRKVTVNVPVMALHRDEENYLNANVFNPDRFLDDEGASKHCYAY…
	CYP4CG21	AVLSSTRHTHKGMPYTFLYPWLGEGLLTSAGEKWQHRRKLLTPAFHFLILKKFFITFCERAEELMKTFDKEADKDRTELFPLLSKSTLSIMCETSMGTTPQEDIETLTNKYFQPVHTLSTIIIYRVTRLWLFTEFMFQFSNVSKIQSLALKSLNNFTTQIIQYRRKSRNQMPVSVAFGDESDDVYGKKAKLAMLDLLLDEERKGRIDEKGIREEVDTFMFEGHDTTATALCFLIMSLANEQKIQALVREEMLSIFGDSQRIPTIEDLSKMKYLECCIKESLRLYPSVHFISRMLTEDLKIGQKFAMMELKTVISSLLRKFHLEAITKPEELVFKPDLVLRTSKPVYVKFCKLMKND
	CYP6AE112	VILFLILLVIFILYQVLKYKYGYWERKKVPHIKPVPLLGNYGDYILLKTFIGDVVSKICAKFPNEPYIGAFYGTEPALIVQDPELLKLILAKDFYYFHGREVTQYTDREPLTKNIFFTHGDSWKVIRQNMTPLYTTAKMKNMFHLIEKCSRVFESLLEEECIASDSIEVNCLMCRFTMDCIGSCAFGVETNGMQKGHELNPYVIMGSQIFARSTLRGIKNISRAIWPYIFYKLGLQIYPESITHFYVDLMRKIFKQRDFKPSPRHDFVDFLLNLYKDKYITGEGIMTIKTGETQKVTMKVDYDLLAGQCISFLGAGYETSATTLAMTLFELAKNEELQTKVIKEVDEYLDKHNDILDYSIVTDLPFLEACIDESLRLYPPLTNLTREVMESYTFPSGLT…
	CYP6AW1	MSLSGVLLVILILLTLLLAVFHYSSKGRKYWFFRNVPYREPCPLFGNFGATFTMRKSYTRMLQFFYDNFRDKKYVGLFQARRPTLMIIDLDMAKTVYSKEFQCFSDRVSASTDTQREPLLRNLANMSGAEWKAMRHIVTPTFSSAKMKAMFPLIADCAQTLKNTMLKESVDEVNVPSLMSRFTTDVIGSCAFGVDPGSLKNPESPFLKMSQKMFKIDRSTVLKRYCRTFFPRLFKLLNLRSYSEDVEAFFTSIINQVLAERRSGVQRHDFLQLMLNEQNTNSCFQMTDALITSNSFIFMLAGLETSATTLSFCLYELARDQDLQEDVRKEIMECLERHNGLNYDAVIAMHLVYRVVAETLRMHPPTPMTTRLCTAPCTLDEHLTLKLKDPVLIPIHCIQ…
	CYP6AE113	MDKHRKFGYWEKRNVPYVKPLPLLGNYAKYMLQKQYPGQMLQELCKRFPDRSYFGAFFGTEPVLVVNSPEVVKDVFTKDFYYFNGREISDHVENEIITRNLFFASGDKWKVVRQNLTALFSSSKMKKMFYLLEKCNHSLEDMLTYETSKNNVIEARDLGARYTMDCICSCAFGVDSMVMGKETNNVFKTMAEQIFEASNTRGLKMILRAAWPSLFYGMKMQLFPSTIDEFFSKLLKGVFESRNHKPSPRNDFVDLVLTFKNEENLIGDSISNSKTGKDTKIKLKVDDDLLVAQCILFFAAGFETSATTISFTLFELAKNPAVQEKVIAEIDEYVARQKNKLEYECVNDLPYLDAAVYETLRMYPIFGILTLYHFHFNPDYFRDPEEYKPERFLPENKKD…
	CYP6AE114	MGALLVIATLLSTICFLIYLISIKKFNYWKNKNVPHVKPWPIFGNYANYLLLKEYPGQLLQKLCLKFPGQPYFGAYYGTEPTLIVHSPEIIKDVFTKDYYYFNGREISNYVKCEVMTQNLFFSSGDRWKVMRQSLTPLFSSAKMKAMFYLLEKCNHCLEDLLDLETSMSNVIEIRGLSARYTMDCICSCAFGIEANAMGSDKNNVFKVMAGQIFEASNWRGFKMVFRFIWPKIFYGLGFQFFPPTIDAFFSKLLKGVFESRNFQPSPRNDFVDLVLVLKKEQNLIGDSMSNLKSEKGTKVTIPVDDDLLVAQCIMFFAAGFDTSSATISYTLYELAKNQKAQVKAQQEVDEFLRRHKNKLNYECVNELPYLDACLYEALRLYPLFGILTREVMEDYEFS…
	CYP6AE115	MAALLLFVSLLTVLISLLYYISQRKFGYWEKRNVPYVKPLPLLGNYAKYMLQKQYPGQMLQELCKRFPDRSYFGAFFGTEPVLVVNSPEVVKDVFTKDFYYFNGREISDHVENEIITRNLFFASGDKWKVVRQNLTALFSSSKMKKMFYLLEKCNHSLEDMLTYETSKNNVIEARDLGARYTMDCICSCAFGVDSMVMGKETNNVFKTMAEQIFEASNTRGLKMILRAAWPSLFYGMKMQLFPSTIDEFFSKLLKGVFESRNHKPSPRNDFVDLVLTFKNEENLIGDSISNSKTGKDTKIKLKVDDDLLVAQCILFFAAGFETSATTISFTLFELAKNPAVQEKVIAEIDEYVARQKNKLEYECCTTSTLTLIYFRDPEEYKPERFLPENKKDLKPYTF…
	CYP6AE116P	MEDFFPEPQKYKPERFLAENKQNIKQYTFFPYGEGPRICIGKRFARMQVLSGLITILKKYKVELADGMPKTLKFDPRTLLTPTFGPRHRLEVYSTGGWEDRKLVRV
	CYP6AE117P	MAALLVFVSLLAILITLIYFISKKKFSYWEKKNVPFIKPLPILGNYAKFMLQKQYPGKLLQELCRKFPNQPYFGAFYGTEPVLVVQSPEIVKDVFTKDFYYFNGREASHYATKEITTQNLFFASNNRWKVIRQNLTALFSSAKMKKMFYLIEKCNHGLEDMLEYGTTTKNNVIEGRDLGARYTMDCICSCAFRSSQTLWAKKETIYSELWLLESSKLQIQEEDDYLVGDSITNSKTGRNDKIHLKVDDDLLVAQCIMFFAAGFETSATTISFTLYELAKNQKAQSRVIEEIDEYCTRRNNKLVYECINELPYLDAAVYETLRMYPIFGCAHS
	CYP340AG2	MVVWSWMKPRGLSPPTYPGALPILGNAHQMMGDAIHWFEYEKYMFNYCLKNGGIMKLLIGPHQAFIMTEPDECLIVANACMNKPYLYEFGKDCYGRGLVTAKESTWKPHRKLLNPAFNLQVLNKFIAEFNVQARELVSLLEPKVGKESFDVQPYLVSNSLKNVCRTTLGFREQDQIMVDKDYAQATENLFHLFGERIPKFWLHVPFLYNLSSLKRKENKLTGVTKRIIKKRRSEMKLNSNYEMNSDSKSDKFKPLLDQMLELAENQDAFSDEEIREHLDTIVAAAFDTTATSMTYTLLVIGSDSVMQERIYKELKSELGDRDVTKHDLPKLVYLDAVLKESLRLYAPVPLAARNVDSDIQIRNYTLPAGSTCVFSLYGINRHSMWGADVEEFRPERWLN…
	CYP4M57	MLPYLIGTLVLLCVINILLNYNERARLIKKIPGPKDDFLFGNALTIIRSPVEIMKMGREFAATFDGIFRLWIFPYSAVVIYNPEDVEIVMSGMKHSDKSIIYSIMKPWLRDGLLLSKGEKWHDRRKILTPAFHFNILKQYCEIFERNSERLIDNLKRSPGKAIDVVPVLSEFTLHSICETSMGTQLGDDTTEAKSYKNAIYDLGSIFYERLVRIYLYVDFLFYLTPWGRKQKKHLKAVHSFTENVIEQRKEYIEKNGINFNEQLDDDDSFVYKKKKKTAMLDLLLSAEKDGLIDREGINEEVDTFMFEGHDTTASGLTFFFMALANHRNIQDKIVDELKDIFGETKRPITMDDLSKMKYLECCIKESLRMYPPVHFISRNISETTVLSNYTVPAGSHCH…
	CYP6CT1	MSFIFTHIFNVRTVIVLIFTIIYTVLWFRQKFSYWARRGVFGPKPEFLFGHIKKVIKRKEQFFQPYYDNYFKYKHLPYIGMYSFHQPVLSIHDPDIAKLMLIKDFDYFQSRGTYAGGVGDPLAANLFNIFGRRWKILRLKMTPTFKPGKLKTMYPIVEEIASKALDYVDELHKDGKTVNFSDFYSKYAMEIIGNVGFGVECNGFKNPDSEFYIRGHEYFDHKSHYWRLIRAFAFFAPDTFDSLKIRRISSKIEDFFYGIVKSTVQYRQENSVTRNDFLQTLIELKNENVGDEKENMECTAVTHLPFTMTDVAANTMLYMIAGYETSATTGQFAAYQLALNPEVQAKAREEVLRVLAKHNGECTYEAQNEMGYLNMVLDETMRIHPSMRALFRRCNRDYK…
	CYP314A1	VQSTPPPLVDWSCVPTLVLAVILVVVAATALAARTADGKQSTRLPGPQPLPFLGTRWLFWSRYKMNKLHEAYEDMFRRYGPVFVETTPGGAAVVSIAERAALEAVLRAPAKRPYRPPTEIVQTYRRSRPDRYASTGLVNEQGEKWHHLRRHLTAELTSPNTMQGFLPELNNICDDFLDLLDSCRRSDGTVTGFDQLTNRMGLESVCGLMLGSRLGFLERWMSGRAATLAAAVKAHFRAQRDSYYGAPLWKFAPTTLYRTFVKSEETIHTIVGRIVSELMEEAKIKKQGSANDDGMREIFLRILENPALDNR

## Sheet: C
T. ni GST genes
Gene name	Subfamily	Length	Peptide sequence
GSTe1	Epsilon	234	MGTSASKKITETGLKHCTLWKADRSPACRAVMMALDSMNLSITEVDINIDKGEHRTPEMLVLNPLQTLPVFKDRELVLCDSHAICSYLAGRYCDAGRLLPKDPGGRSIVDQHMHYNSGTLYPRFRAAAYPILYENCHFVMPQQIADIECAYADLECMLLGRCWFGGSWATLSDIVFASTVSTLNILVPIDKTKYPRLSSWLFRVSEELFFVTANRKGLSEFSRRIGELSHVQQS
GSTe2	Epsilon	244	MSLFRGSSCIRYTIQNMCRPYRCHVRTFSVVKKPILYGDIASPPVRFAMMTASVLNIDLDFHNIDLFKAENKTDSYKKINPLQKIPALAVNDDVICDSHAIALYLCRSAEDYDLYPDDASLKAKIDELMFFNSSVLFPIDSFVFSEFFVGKWPADESKLNDWNIALDYLDLKLRTQTWLTGDKMRLCDICCGTTLSSLEILIPVSDRHPNVKRWLDNLKALPCFEINSRGLKRLQDFVKLIGKK
GSTd1	Delta	214	MSLKLYHFTVSGPSRGALLAARYLQLPIEIQPVNTFKKDNLKESFLKINPQHCVPTLEDNGFILWESRAIACYLADKYGKDEQFYPKDLQKRAFVNQRLYFDATFLNVKMRAICAPILFSGATEIQKPLKDDFNTTLGFLDIFLSSTKWLAGDNPTVADTASYATLSSILAVGWDISSFPNIQRWVKQCGSLPGAEENDAGAKEYGEAVKKNLR
GSTd2	Delta	214	MSVKLYHFPISGPSRGALLAARLVEVPIDVEIVNLFQKEQMKESFLKINPQHVIPTLDDNGFILWESRAIACYLADKYGKDDQFYPKDLKKRALVNSRLQFDGCTLFVKIRAICFPIIFLGETEIKKPLKDDLNTTLGFLDMFLNDTKWVAGNHPTIADTSIYASVTSILAVGWDISSFPNIERWLKECSQLPGAAENDEGAKAFGEAVKKNLK
GSTd3	Delta	201	MSLKLYHFTVSGPSRGALLAARYLQLPIEIQPVNTFKKDNLKESFLKINPQHCVPTLEDNGFILWESRAIACYLADKYGKDEQFYPKDLQKRAFVNQRLYFDATFLNVKMRAICAPILFSGATEIQKPLKDDFNTTLGFLDIFLSSTKWLAGDNPTVADTASYATLSSILRWVKQCGSLPGAEENDAGAKEYGEAVKKNLR
GSTe3	Epsilon	199	MVLTLYKMDASPPVRAVYMVIEYLNIPDVSYVEINLLADEHLKDNFLKHTIPHLTDGNFNLWDSHAIITYLVNKYAKNSPLYPSDPEKRALIDLKLHFDSAILYPALRENDERIFFGTDTSLRPEGVAKIKTAYDFTEKFLTGVQWMAGDQLTLADISCVASVSTLNELLPIDKKVYPNITLWLMRCSQFDFYKKGNLP
GSTe4	Epsilon	224	MVMKLYKMDFSPPVRAVLMVIEVLEIPDVEMIDLNLFKGEQFSEEYLKINPQHTIPVLIDDDVTICESHAIVTYLVDKYGKDDTLYPKDLKKRALVNQRLYFNSGILFPCARGAGSPLIFKGAKGFSPESIESIKSGYVFAERFLSRTPWMAGDHMTLADICCVSTLSSMDAVMPIDEATHPNLCKWLKRCSEFDFYKKRNVPGLEIMRGYVTARLAEIAKEQA
GSTe5	Epsilon	217	MGLKLYKKDTSAPCRAVYMVIELLKIQDIEYVTMNLKGRDHFTDEYLKLNPQHTIPTLIDGDFAIWDSHAITTYLLNQYAVDDSLYPKDPKKRAIIDQRLHFDNAILFGSLRETMVPVIYDGEKTLRPENVDKIKSGYDFIESFFTGPWLAGDSLTLADICCVATISSLNEVIPIDKKQYPKLTAWFEECSKQEFYKKANVPGLLLFREMVKSAELE
GSTo1	Omega	252	MSNVMPEDLGSLINAESFSMGKEGDPVPPFNGKLRVYNMRFCPYAQRTMLALIAKGIDYDLVNIDLTAKPEWYASKSAFTKVPALEIAEGVSIYESLVTVEYLDEVYPQRPLLPKDPILRAKDKIIVEAAGPISTAFMKLIWAPDTVTNEVINAFFKALDFVQNELKVRGTKFLDGNQPGFADYMIWPWFEKILTIDDERLKMDEKEYKLLLAYLKSMLQDPVVSEYLIPKEITQAMYSAYKSGGKPKYDEL
GSTo2	Omega	281	MLSTAVSLVSHLYTSFQGVQAVRRVLGYINYSNMAARSKINFNTKHLKTGDPLPPFTGKLRVYNMRFCPFAQRTILALNAKEIDYEVVNIDLVDKPEWLASKSAFTKVPALEIAEGVSIYESLVTVEYLDEVYPQRPLLPKDPVLKAKDKIIVEASVPLFSTFIKLVKAPEAVTDEVINSFFKASDFIQNELKGRGTKFLDGNQPGFADYMIWPWFERLITIDDERIKMDEQKYKLLLAYVKDMLQDPIVSEYLIPKEVFQTFHNAYKVGEKPNYDLLFEA
GSTo3	Omega	254	MSEKHLQTGDVLPPYSGKLRVFAMRFCPYAERTVLVLNAKNLQYDLVFVNLDHKPEWLFNFSPKGTVPALEYEQGKAIFDSNIINFYLDEKYPEPALQSADPLRRAQDKIIVELFASVQSAFYTAAYNAQNLQPEMVENYHKGLESLQKELVARGTKYLHGDTPGLVDFTLFPFFERFEALPLIGKPEFALDKAKYEALVNYIDAMKTVPAVKSYYLTAETHAKFMESRNKGDANYNMLDTSDVCCMRPRKKKE
GSTt1	Theta	228	MALKLYYDLMSQPSRSLYILLKYANCNFESKLLALRKGEHFGEEFTAINRLQKVPVIDHNGFVLTESVAIIKYLSRENLIPDSIYPKASKQAARVEEFLEWHHAGLRLHCAMFFRVKFLIPSIVGQPEEPKNIDGYLRRMEAALKEFDTKWLGRGNNFITGNTVTVADLFAACEVEQPKMAGYNPCEKFENINVWLKKVRDHFNPYYDEAHEVLNKIGKNKFKMASKV
GSTe6	Epsilon	233	MRPILYKQNASPPARAVMMVIDILGIDVDLQDLNPVFREQDAPEFKKKNPMRTIPIYDEGDFWMADSHAIIIYLIEKYGKPQHSHLYPADPRKRAVINQRLFFDCGVLFPRLRSVMAPTYMQRLGEMSKSMIRNINDAYSMLEDYLSENLYMADNVITIADISVVSTIGTLCGLVPIDGNKYPKLNKWLQNMNEQEYCKKINIPGGLEHSDGLKILMEMNKHNQAQAKAKSKL
GSTe7	Epsilon	223	MAPVLYKIDASPPACAVRMLADIIGLQLEIKDVDFRTMEHKSPDYLKMNPLGVIPTLNDNGFLLGDSHAIMIYLLSVYGGNKSELLYPSDPKARALINQVLFFDASILFIRIKVVALPTIMEGLKAPTERHLSDLEEAYGMLEKFLSRHRYVAADHLTIADLSVATTLFAAVAIKEIDAEKFPLSTAWYKRIQKESFYKEIAAPGGVSFTQAMQYSWQKNSQQ
GSTe8	Epsilon	174	MAPLLFKIDLSPPANAVRIHAIMIYMVSKYGGDKSELLYPSDLRTRAVVNQVLFFDASVLFVKNKNISKATIFDGLKAPTERHLADLEEAFDMLERFLTRNSYVAADHLTIADLSISCTLTFSLLIKELDTEKHPRIDAWYKKMQQEPSYKKIAVPGRLAAKQTLDYFRQKNNQ
GSTe9	Epsilon	228	MAFCRESIITPVLDKIDPSPPANAARMLAEIIGMELDLKDVDMISFEHKSPDYLKSSHAILIYLVSKYGGSKSELLYPSDLRTRAKSCSMMSLQKEQWLTYNNRSQTLSINTTISYLSDQFQMAVILEGLKAPTERHLADLEEAYVTLERFLSRHRYVAADHLTIADLSISTTLYATAIIKEIDPVKFPLTTAWWNKMKQEPSYKKIAQPSSLIAQQSMAFFIKKNNA
GSTe10	Epsilon	244	MSITLHKSDGSPPARAAMMITELLKLKHERVDVNVMGGDHLKPEYLQKNPNHSVPMLDDNGFIVADSHVILTYLVEKYGQNQAQLYPKDIALRATVDQRLFFEASNVFGAIRALISLIMQQQPTEPSPEVIQKVNEAYKTLEAYLSKTKYVACDHLTVADISLASSISSLNGVIPIDAKYGKLRAWLSSLENEEWYKKGNAPGLAMFTGFINSVFEKNADGNMEKIPARLPLTVTRREVQEYVV
GSTe11	Epsilon	213	MTIKIYSHPTSPAGRAVFMLTEILNLKYEFIEVSVMAGDTRKPEYLEKNPNHTIPMIEDDGYILIDSHAILTYLVEKYGAKQAQLYPKDLQLRSTVLQRLFFEASTISAAFLSIFLEIAMNNGPGPNAAQLEKSNDVYNILDKYLSKSKFVAADHLTIADLACISTISTMANVSPIDAKYEKLTAWYKSLSNEEWFKKGNLPGLTAISQYLKS
GSTe12	Epsilon	222	MTIKLYKFDGSPVVRPALMLADILKLELESVNVNLRNGDHLKPEYVKKNPNHTIPMLEDDGFIVADSHAILTYLVDKYGQDQQQLYPKELNLRTTVNQRLFFEASTIANARTAALSGVYKNNATGPDEEGLKKVHDLYKILEAYLSKTKFLACDHLTIADLSCVASISALDVAVPIDTKYEKLSAWFNTLKQEQWYKNGNEPGLNIFTQYFKSMVAKNSGQA
GSTo20f	Omega	158	MSFYQDRSVGHLPPPGLSDKLRLYHVDMNPYGHRVLLILEAKKAKYEVYKLDPLRLPEWFKVKNPRYFLFSILSGTNYFSGHRPGMLDYMIWPWVERLYLLRCVSEQKFDSKRGLFPNFADWADQMQLDEVVKKHAVSPQEYFDYYRNARTHSMGYYI
GSTz1	Zeta	214	MAKPVLYSYWRSSCSWRVRIALNLKEIPYDIKAVSLIKGGGEQHCNEYREVNPMEQVPSLCIDGHTIVESLNIMHYLEETRPQRPLMPQDCFKRAKVREICEVIASGIQPLQNLIVLIYVGEDKKKEWAQHWITRGFRATEKLLSACAGKYCVGDEITLADCCLVPQVFNARRFHVDLRPFPIILRIDRELENHPAFRAAHPSSQPDCPPEVAK
GSTz2	Zeta	192	MAKNGAILYGFWQSSCSWRVRAALRFKNIPYEERGVDIVKTKQQGTEQYRAINPAQKVPALVIDNETLVESMAIVQYLEESRPQPSLMPGTLMERTIVSGIQPLQNIGIKRSFSTLEEYLKFSKYWTERGLLTLEELLRKSAGKCCVGDQITIADLFTPDLSKYPTVSKVYKALLNEKVFQETHPEYVKTKL
GSTe13	Epsilon	215	MSIIIHKTAVSPPARATLMLTKILGLNVETREVQLPTREQFKPAYLMKNPMHTVPLLEDGGFVLADSHAIMTYLTSKYGGTKQELYPKDVAARAIVDQRLYFDASILFPHLRSVINKVVKSRAPGLTTEQIADIEESYYIADKYLEATRYVAGDVLSLADISCVATISSLNSIIEIDEKYVKLREWWALLQKEDWYQKENEPGLRLFDGFIKKFL
GSTe14	Epsilon	224	MVVKLYTMDLSPPVRAAMMACDIFSVAYERVEVNLLEQEQMKPEFLKKNPLHSLPVLEDDDLILHDSHAIMMYLADAYGMDESWYPKNNKKRALVNQKLFFDTAILFPRLRNVTYSIVNEGKKNITQKMLDSIDEAYGFMEAFLSRSTYIAGEDVTIADLSVVSDISSLAYILPIDAQKFPKTLDWLRGLESQPCCERYNNPGAAELGQLLKRFQESNSSAQIE
GSTd4	Delta	227	MAGESENVVRNMPIDLYYVPGSAPCRAVLLTAKALNLNLNLKLVDLHHGEHLKPEYIKINPQHTVPTLVDDGFAIWESRAIITYLVNKYGKGSNLYPEEPKARALVDQRLYFDIGTIYQRFADYFYPQLFGGAPADKDKLAKIEDALNLLNTFLEGQKYSAGPNLTVADLSLIASVSSFEASDIDFKKYSNVKRWYETVKSTAPGYQEANEKGLDAFKGLVASMMKK
GSTd5	Delta	217	MAIDLYRSLGSSVCTTVQLVAAALDLELNLIDLNFKEGDHLKPEYLKINPQHTIPAIVDDGFALSESRAIARYLVNKYGKDSTLYPTDVKLRALVDQRLDFELGTLCTRFAQFFYPQMAGAPADEALKKKFEDALKILDALLEGNVYAVGDKLTIADLSLVANVSTFEAFNTSLKEYPNILKWYELVKSTAPKYEEITEKALAHVRVKAAQLLSKQE
GSTd6	Delta	207	MAIDLYRTEASASCTTVQLVAAALDLKLNLIDLDMQGSDHLKPEFLKMNPQHTIPTIVDDGFALWESRAIARYLVNKYGKDSTLYPTDIKLRALVDQRLDFDLGTLYTRFAQFLFPQFMGAPADEALGKKLDGALEVLNALLEGNVYAVGKHLTIADLSLVSTVSYLEAAGISLKEYPNLLKWYDLVKSSAPQYEELTEKPKALVRD
GSTd7	Delta	182	MAIDLYRTEASASCTTVQLVAAALDLKLNLIDLDMQGSDHLKPEFLKMNPQHTIPTIVDDGFALWESRTIARHLVNKYGKDSTLYPTDVKLRALVDQRLDFDLGTLYTRFAQFLYPQVMGAPADEALGKKLDGALEVLNALLEGNVYAVGKHLTIADLSLVSTVSYLEAADISLKEYPNLLK
GSTd8	Delta	207	MTIDLYQYLASPPCTTVRLVAAALDLDLNIIDLKVAGEQHKTEFLKINPQHTAPTISDDGFALWESRAIARYLVNKYGKNSTLYPTDVKLRALVDQRLDFDLGTLYSRTLQYIMPKFSGAPLDESLKKKFEDALAVFEALLAGSVYAVGDHLTIADLCFASTVSTIEACDISLKEYPNILKWYDLVKSTAPKYEEVTGKACEALRGI
GSTs1	Sigma	204	MAPVFKLKYNDFMGVAEPIRYLLAYGEIKYENVEIKDNVDWIEEKRFPFGKLPVLEVDKKVLYHCVAISRYVGKLVGLLTPDDLEAAELDAIAMSLHEYWQKVYQWYNETNEMKSVLEKELVEKICPKYLGEFQQIVQKKGSYFGGTKLSWVDLYFVAIVESIEAMWGSKILDKDYPKLHLVYKHVHEIPVINAYVSSRRNYKY
GSTd9	Delta	198	MPTQPIKLYYLPPSPPCRSVMMVARVLGIDLDLVVTNIMEGQHMTPEFLKMNPQHTIPTMDDSGFILWESRAILAYLVNAYGRDDSLYPKNPRQRAIMPMLFRGEEYNEESANKLNEALGWLDAFLDGRAFVAGDNLTIADISIVVTMTNLEAFGYDYSAHENVSKWFERTKKALEPYGYQEIDVAGAQILASFLKKE
GSTs2	Sigma	205	MPQYVFSYFPVKALGECVRLLLAYGGQEFEDKRVAFETEWPEMKPKTAFGQLPILEIDGKQYAQSVAISRYLGRKYGIAGADDEEAFEIDQNIDFVNDIRSKAATAHYENDPEVKAKKQETLVKDVYPLLLPKLNAIIEKNDGHIAAGKLTWGDFYFAGLFDYLKVMLQMPDLEAKYPAFKKLIDNVYSLPKVKAYADAAPKTDF
GSTu1f	Unclassified	182	MGLKLYSVSDGPPSLSCRQVLAALDVPFELVDVIFNNGEHMTEEYAKMNPQKEIPVLDDDGFFLSESVAIMQYICDKYKPGSSLYPTDPKARAIVNQRLLFNLTTYYANVAPYTMAPIFFAYERTPEGLKRVHMALEVFETYLTRLGSSYAAGDQLTIADFPLINTTMTLEAVGVDFSKYAK
GSTu2f	Unclassified	186	MNPQKEIPVLDDDGFFLSESVAIMQYICDKYKPGSSLYPTDPKARAIVNQRLLFNLTTYYANVAPYTMAPIFFAYERTPEGLKRVHMALEVFETYLTRLGSSYAAGDQLTIADFPLINTTMTLEAVGVDFSKYAKINQWYNNFKNNHPDLWKISAAGMKEIKHFDANPPDLSHLNHPIHPARKQKA

## Sheet: D
COE
Class	Name	Clade	T. ni	B. mori
Intracellular catalytic class	α-esterase	A clade	43	42
	α-esterase	B clade	14	13
	α-esterase	C clade	0	0
Secreted catalytic class	Juvenile hormone esterase	D clade	4	4
	Integument esterase	E clade	3	2
	Juvenile hormone esterase	F clade	0	0
	β-esterase	G clade	2	2
	Uncharacterized	H clade	2	1
	Glutactin	I clade	0	0
Neurodevelopmental class	Acetylcholinesterase	J clade	2	2
	Uncharacterized	K clade	2	1
	Gliotactin	L clade	1	1
	Neuroligin	M clade	6	6
	Neurotactin	N clade	2	2
	Partial gene	NA	6	0
	Total		87	76

## Sheet: E
T. ni COE
Gene name	Peptide sequence
TnCOE1	MSDPVVETPQGKIKGKVIKIFDDFEYSSYKGIPYAKPPLGELRFAAPQPPDSWEGIRDGTKDCNICAQFDKETKSIVGDEDCLYLNVYTPKLPSDKNELLPVMVFLHGGGFLFGHGTDDSAHGPDFLVKRKIVVVSLNYRLGILGFLSLDRKEATGNMGLRDQVQALKWVQQNIKEFGGDPNSVTIFGISAGGASVEYLLLSPMAKGLFHKALAQSGSSLLHWAYNADVKKLASKIPFLNGKVVVDDDDLLKYLKGLSTNELITASMLALATDEWRGGIHFGFVPTVEKPGDWEPFLSKPPYELLSKGEFNKVPYMSGFCSREGLLMVSHGAPTLEKFIKEKVFVDYFPFDLDVPEKINTELKLKTNYLEAERIYEDPDAYAIDFFSDVDFIGGIYVAT…
TnCOE2	MILNFKVEGYPVLVWFHGGDFVRGSPNSVNPIFGFFSTLDNEASGNFGLLDQVAALTWVKNNIESFGGDPENVCIMGHDAGAVSVTLHLISSYSAGLFQKAIAMSGNALSPESVNVARKEVVTVDKVAVAFSCFRKPTYQLLDCLRRVPDQALLDIAGPVTDWKPIVDGGFSNITSPFIPEMPEKLFKDEIFSPVPLLAGYTNMEDGLLLEKDDSGDSGISQREFDSMREEIILADITVDNSSCFTNQHHIQDTVAFFYKPIPPTTNETILRKLFVDFYTDKTHGATTYHLAKLISPHSPVFLYRFDLKPFSDIANEGLPEWIGVPHNFDLIFTFGMPYLALPEDLSKWDYRDKSISEIIMRMWSNFVSKIEQILTLTLNLNKYVTECMEEFSRADEGK…
TnCOE3	MILNFKVEGYPVLVWFHGGDFVRGSPNSVNPIFGFFSTLDNEASGNFGLLDQVAALTWVKNNIESFGGDPENVCIMGHDAGAVSVTLHLISSYSAGLFQKAIAMSGNALSPESVNVARKELLDCLRRVPDQALLDIAGPVTDWKPIVDGGFSNITSPFIPEMPEKLFKDEIFSPVPLLAGFDLKPFSDIANEGLPEWIGVPHNFDLIFTFGMPYLALPEDLSKWDYRDKSISEIIMRMWFKFRLAFESNEFRSNN
TnCOE4	MNRSWLCVALALVTVCAPAQAVVGGAPASPPEPDAAVVFTQRFGFSSRIEGHKDDKLGYYSFFGIRYAEPPLGPQRFQRPVRRYLAGEMMATNQCPPCPQPDPYQPRRIIGHEDCLCLNVYAPKMPATEQGSPVVFFIHGGNYRTGSTGPYGVRINILYNISGQHLAQKDTILVTAQYRLGSLGYLSTGQRDAGGNLGLFDLHTAMVWIQDYIQFFGGDPKRVVVMGQGSGGSAASLMAMSPEGRSASGVAALSGTPLSPGAVRPDPAKHAEALAERTGCPKAPAESLLICLRKLPVEELVQADEDLNMDMVDTQRFLEEISGRSGAGARVEGKDDLRGLPPLVAEAPAESLNKEQKRVPFLTGVTKAETSRAVFGKFNKFLTNQLQTVTDFLKKDVIG…
TnCOE5	MALCESCVIIAMFFLQPATPHPDFKTPFEAFSDLALCPQFVDGEATGTVHCLQLNVYTPNHVTAGDKLPVMVYIHGGAFVEGNSRLSTFSPKFLIRHDVIVVAFHYRLGKYGFPKQFPGRKENRNQGLKDQFLALKWVKRVIKDFGGDDENVTLFGHSAGSISSDMLLLYTQGLFHKVILQSGNAAFPGLIEHVDAK
TnCOE6	MLQIALFLFLCAYAHGVSVTTTEGELIGSKAQDGDYYVFYGVPYAGPTDRDNRFKAPVPAVPYPGPLTALDSNVMCAQPTERGLVGVENCLKLNIFTKNVTTPKPVYVFLNSHEYTTSPIQTMFSYKDLVEKDIVFVTMNFRLSVFGFLCLGVPEAPGNAGLKDVIHGLKWIQENIASFGGNPNNVVLLGHGAGAAVVDLITLTPQSQNLVHKAIALSGSALAPWAVAYEPIQHAQLLGDRLGYAGKSSEDLAINLIITDIHVINSGLDFKFQNNTPIFAPCIEDPNVNGSLLTDAPINVLRSGNYSHIPVIYGYTSKEGTLRVTEAASGDWLTLMQNNFTDFLQVDLKFNENTTVEAANIRNFYFSNSAISMATIDDYLDYQGDTLVLVSTIRTAIAR…
TnCOE7	MLQYYGSYRPSAKMAGIKLSVVFIAFVINVIHCQVIVDTSLGKVEGIEIKSIVKDEKFYSFMGIPYGKAPIGELRFKAPEPHEGWTEVLSAKKEPKPCAQLNLPVRPLKKYGFSGQEDCLKLGIHTPKLPENEDLKMPVIVSPKAKGLYNKAILQSGTIYNSISLPTKPKEKANALAKQLEKTAVTSSNLISELSHVSAMELVSAELLSVDADEGRDTQMASVPFGPVVEPDHPDAIMTSMPEDTPVDMDVPIMIGYNSREGIGMAERYLRKPQYLTFAERDFLLILSTRSGFHLELNSEIYKAAEAEIKDFYFEEGYVKISKPGEYLTYIADVMTFYPIDYALRRYANESNAPVYYYLFDYSGELNLRKNEVLDGALTMEGTWGANTGDELCYLFVCK…
TnCOE8	MKTLTLLLTVVLINQCFCDETIEVSLKQGVVVGKVEKTLMKNEKYFSFKGIPFAEPPVGELRFLPPKPHEGWSGNLEAFENKPTCLQLSIRSRNREDTGISGSEDCLFISVFTPDIKGNAPVVVFDYNDNFRTGFNGTNNYAHDFFVEEGVIVVTISHRFSVFGYLTTEDDVIKGNNGIRDYILGLEWVKNNIKEFGGDSSRVTLMGSYGGAVMADMLLYSERAKGLFSAAILQSGTSRERLFFYEHPRRKAFKLGEVFNITTEDSRELLEGLQKVDAEKIYLSLTETLVDDDEEVYRAGVFPYTPTVEQTEDAVITSLPEKGKLVNDVPLIIGYNSREGIDLISHIIFEPRVLDTKLEETLLRLPVRLDFKFDTNSSIFEQARKEILEFYFKDKSLHY…
TnCOE9	MYLNKMYISIAFLICVKFVVCEEKPVVDTTHGKIMGKVLKTLMDVNYYGFMGIPYAVPPVGELRFMPPQPLDPWEGVLRTTKEKPACIQFNNDVKKGQSLGHYGSEDCLYLDVFTPAIDEEERAVIMFIFNDHFLNSYNKSKDYAPDFFIEEDVVVVTISHRLSALGFLSLEDEILPGNAGLKDIVHGLEWVKDNIDKFGGDPKRITLMGLQGGAAAIDLLIHSKAKDLFSGAILHSGTSWTSAYLQEDVKQRAFRLGELMNRTSTNGVKLISDLQEVEAEHLLSKDLHASPSDYFKATQKSVISFAPIVERQSHGLLTEYPEDSTSKIDIPILIGFNSLEGMEAMLQYLVEPRFLTFLRKDFPLLLPRRLRFKFNHMGDVYDEAAKEIKDFYFTRGEI…
TnCOE10	PPKSIRWFDKSVYNYSIPYNESCALGYSEDCLYLSIYTPIIQDIKYFPVVVWVHEYSHAHGPDFFINEDVLVVTVSFRTSIFGFLNTGDSFAEGNMGAKDLIAALKWIREYITYFNGDLNRVTVFGSETTAPIVASLLLSAAGEDLFNRVIVQSGSALSPADYRTYNFEVSNKLYWNLHGPFEKFNRTNLYELLSKSSTKQLLAASRDLFDSTEVRDNQRLINAFSPTVEASARGAFMNKFPLEVYDRKITNNAVEVMLGYTNLDSLHKLDGFVTNRKLLKYLNYNFQYLLPFEGRKDEYGSKLYKKIRRKIMDFYFVNGTVGERSLRRYAKYVSDQVIYPILRQASLHAQVSCNHVYLYRFTFRSSFNIVWNTLLRNLNLSGATAGDEICYQFKCKSL…
TnCOE11	ATSVLLHLYADTDRYYHKAIVESGTPQSEGMFVNADTEVPVKLAAHLGYTASDTQDALQFLSKSPHELVTGAALELNLHLRPCKERSFSGIPIFVADDPYSLTNEKKVSKTPILIGYTSQERDSLSSDYFDSDPFYEKLKNNFNLNEQQLAEAAKIARRFYLGDKPVSKDVETQLGNFESDFVYNHPTERVITRLLEESASSIYEYLFSYVGDSGAAGAGHSAELNYLFTKGGNPQARSDEDQLIIDRITTLWTNFIKYG
TnCOE12	MSTMDINKVEYEDDNKTLDKKQIEAEEKEVMLKAEDENGDATDLKADDGPVKAALSGDLTEHGREVKPKFIPIGAIKMPGFFTKNSDKDKSKDEEVAIEKDTENEKTDESLKAKENKFQFLQKFTKFLQHPDNENENKEERKKGLFNIRYPRVFQKRGSAPNNADATLASMETLDDKLDTPNDGMETVKLEPVELEEGKVATKLPLKERIRQKKFIIDDIVVAGIVVLVLIVVIIGIIIGAHAGPPVERPLRLGRYITTFSSCGPVEGILDEGVYKFYSIPYAVPPVGNKRFTYAQPLNNLSSCWNGTLDARNRGPLCLQFLENATITGDEDCLTLDVVTPHVRYDSPLPVVILIGANSLAGGISPAQPSALYARTKEVVFVRPNFRLGPFGFLALDIL…
TnCOE13	MLELVTGEGDYYSFKGIPYAQPPTGPLRFKAPQPVKKWKGVRNATQHGSVCPQVEVLSNILIPGNEDCLFINVYSPNIKPKTLLPPERRAFVLGKQLGFDTQDPEQLLNFLQNVTSDKLVNTAPYVLSFEEYSNNILRMYPFVPVVEKYVGKNSFLTYDIARKVDHMNKADILFGHTNQETATAVGSFVSLFIPNHNKYPELFVPRRLFANLGQDHILSLADEVRKYYFGNKTVDINSIAEFFSSVSSRNVNSQAAIQYGIHGAGHFDELEYLFDRKSMKLISDKDSEEFRLIDQITTLFTNFAKYGNPTPDSSFGFTWPEYDMKTRQYVDIGSNLTVLSMQDTYFHLVYKKFLDINTIFTVVVFLKEYYILHLIYLRVFCKDTSYFDVRNALINGHKR…
TnCOE14	MLVHQVICSVISIVASNGVKVTLKNGKLKGAMLDLVTGEGEYYSFKGIPYAQPPIGPLRFKAPLPAQKWKGVRNATRHGPICPQVDILTNIFLPGNEDCLFINVYSPNIKPKTLLPVIVYIHGGGFKSGSGNDAFYGPDFLIRKNMVVVTFNYRVDALGFLSLGTEDVPGNAGLKDQVLALKWVQNNIHVFGGDRHSVTIMGQSAGSASVALHVSSPMSKGLFHRAIALSGAPISEWALPFQPERRAFVLGKQLGFDTQDPEKLLNFLQNVTSDKLVNTAPYVVSSEEYSNNILRMYPSRLISDLIPNYNKFPELFVPRKLFANIGQDLILDLADEIKDYYFGNKSVDTHSIVQFVTYSNYVAFVYDIVNYFTKLPVLKNTVRYGYRFSCVSSRNVLMT…
TnCOE15	MSCQIDVKQGRLQGKECVTFYGKKYYSFEGIPYAKPPVGKLRFKAPEPPENWTGIRDATKPGNKCCQLNPYSNTAMEGSEDCLYLNVYTPSLPHEKIEKLPVLFFVHGGRFIFGYGHYYKPDYYLKHDVILVTINYRLSILGFLCLNIPEVPGNAALKDTVMALKWVRDNISNFNGDFNNVTVFGESAGAGAVSSYMTSKMAAGLYHKVIAQSGNSIADVYMVDDDPIEKAKTVVSYLGKHLTDERELYNYLLEVPIEDLMVAFSLAELNRHPTAIQAYFLPVVEKEFDGVERFFEECPRIDIPMNRLDKVPVLTEVYFYKFQFSGNLNTRVMKKLGLEGATHGDVIQYQFYRKAKHDKCDENDLKIVEMFSEAWCTFARYGKPTWNGGKSEWLPYTKK…
TnCOE16	MITAVNEFLDDLRGGRMAETPIVRVEQGQVQGRVVNGPSGKAFYNFQGIPYAKPPLGSLRFKAPQPPEPWEGIREATSEGNQSAQIDPQSGDAGGAAVSLLTASPLTKNMISKAIVQSGTAVSNYVIQQTPIESAKTLAQALGCESSDPEEILDFLNATSARDLVTTQAKINPFDSFPEVPNLFTAVVEKEFPGVEAFITEPFIDLLTSGRVAEIPIMIGAVSLEFTTERRNEDLQVFIPKELNIERNSAEALAITEKIKELYFKGKKHTDVESLNEYFELFSDFAINIDTHRHIQNLVKVSNKPIYFYRFDYVGELNYAQKLVNSLGLNRATHMDELGYLFKNDLQQNVTPSNQDIKTRERMLRLWTNFAKSGNPTPDENHYLTVTWLPVTKDNLYYL…
TnCOE17	MKLCAVLVCAFAAVAAHHHKDHNSRGETGSPNTRTSEPLTVAPAGQFRGSWMESRRGRRFQAYRGIRYAEPPVGELRFQPPKMITKHTGEVDATQDGPACPQPVLNKDYPVHEDCLRLNVYRPDGKDVSKLPVVVFMHAGGFYSVSGRSDVAGPHYLLDRDIVLVTINYRLGTLGFLSTGDKLAPGNNGFKDQVMALRWVQRNIASFGGDPHLVTIAGYSAGSFSVMLHTISPMSKGLFHRAISMSGSPISQIEIPRHQRHLAVKQAELLNCTTESSEALIDCLKTKTYKEIGNSLDNMFEYNYDPVLLWMPVQELDFGQERFLPRQPLAALCGGDLQPVPYIVSQTQDEFFWKAYGVLNNNGALLGWNIDFPSFANTAFYLGDDTSGRLATRLKGAYF…
TnCOE18	MFPRACVLLALCAAVCVHAHQHKHQHTTEPARATSTSPPTAAGPVVRSVSGVFRGSWMESRRGRRFQAYRGIRYAEPPVGELRFQPPKLKLQYSGEVDASAEGPACPLPVPPTYYVDEDCLTVNVYTPRTNSSKPLPVIFFIHAGGFYSMTGRSDLAGPHYLLDRDVVLVTINYRIGSLGFMSTGDAYAPGNNGMKDQVAALKWVQRNIAAFGGDPNSVTITGCSAGSISVMLHMISPMAKGSASPINKGPMVTHQRHLAVLQAQILKCPTNNTSVIYDCLMKKPWREIGDSLPQFWSFGPGDPVGLWGPVVEPDFGQERYLSEDPLDSIKHGRMHTVPYIISQTTDEFFWKAFQWERIAPISFLLPAENRSAAVARLREVYLRNKPLANDRESELALG…
TnCOE19	MFTGALLAFVCILGTTTVADDAVKKNAGPLTVTPSGQFRGSWMESRRGRRFQAYRGIRYAEPPVGELRFQPPKPILTYSGEVDATEDGPACPQHAPPGYPVDEDCLTINVYTPHNNSSSKPLPVIFFIHAGGFYSMSGRSDIAGPHYLLDRDVVLVTINYRLASLGFLSLGNKLAPGNNGFKDQVMALRWVQRNIASFGGDPHLVTIAGCSAGSLSVMLHMISPMTKGLFHRGISMSGSPFAKALIPAVQSDLALKQARVSHCPEDNTTALYHCLKPKPWKEVSGSLLGFYEFGYDPLRLWHPVIEKDFGQERYLVEEPMDSLREGRARTVPYIVSQTSDEFFWKAFTILKNKTLLDPMNSEWNRIAPISFILPRNETSDRLARIKQAYLGGHKLVNDE…
TnCOE20	MSISEDLQCIVSTKEGPICGYIDKTGGTDQYKFKSIPYALPPVGRLRFLPPYPVRPWTEVLDCTKDHPIPNYSTKNLDVTGAEDCLYIEVCSPNIQPDKPLPVMFWIGGYFFTYVIDQILDPTLLVEQNVVYVRCGFRTGPFGFLSINDYTAPGNCGLKDVVLALKWVQNNICFFGGDRNNVTLFGSSSGGAIVNYMMLSPMATGLFHKAIIQSASALNNWSLNKNPSQPVIELAKELGINKSSKQEIVDELRKLPAKDIISAFLKLKKASESKAHGFVIDSVFKPCIEVDLEGLPAFITKGPSVTIKSGNFNKVPIIIGSNNTEGSLLEFIVEDFYSDYEKYNENVSLLVPRELTREDKITQTIGHKLLKFYLGGEEYLTPDTRTQYLQLISDYYFTY…
TnCOE21	MTSIPEDLKCIVETKDGPICGFIDKSDEGTYCKFQSIPYAKPPLGCLRFLPPKPIKPWKHIIDCTKTTPENIFEIEKKQYGCNEDCLYIEVSTPDIKPKEPMPVMFWIGCFAYAIVKDKICDPSLINDQNIVFVRCSFRLGPFGFLSINDYTAPGNCGLKDLVMALKWVQRNISAFGGDPNNVTLFGHSAGGAIVHLMMLSPMATGLFHKAIIQSVSALNNWSLAKNPSQPVWDLANILGIKNTSEVEVVEELRSISAEDILKAFHQMNLDAKAANTDVIDAIFKPCIELDYEGQPAFITKSPPLIMKSGNFNKVPLIIGSNNIEGAYEKYNENVSLLVPKSLAREDKLAKNIGHQLLKFYLGGEEQLRADTRTPYLQLISDYYFSYYVNRTVRLHTQV…
TnCOE22	MISNTKIVFTKLLLWYFVSGAWGRSWANHHDTTTSTTQTTPTTSPAPKNFHNDPLIVETKSGLVKGYAKTVMGREVHIFTGIPFAKPPLGPLRFRKPVPIDPWHGVLEATAMPNSCYQERYEYFPGFEGEEMWNPNTNISEDCLYLNIWVPQHLRVRHHQDKPLAERPKVPILVWIYGGGYMSGTATLDLYKADIMASSSDVIVASMQYRVGAFGFLYLNKYFSPGSEEAPGNMGLWDQQLAIRWIKDNARAFGGDPELITLFGESAGGGSVSLHMLSPEMKGLFKRGILQSGTLNAPWSWMTGERAQVIGTVLVDDCNCNSSLLAADPSLVMDCMRGVDAKTISVQQWNSYTGILGFPSAPTVDGVFLPKDPDTMMKEGNFHNTEVLLGSNQDEGTYF…
TnCOE23	MECLQTAWCWCAALLLATLAAAGPRYSSRIVHTHAGAIRGIIVEPASRRLEPVEVFLGVPYAGAPARLAPPPPARDWPGTRLADAFAPVCPQRYPDISNKSAALTKMPLGMYNELRATVPLLANQSEDCLYLNIYVPGSGARGVEAPYAVVVWAGGPSHAWGTANALDGAVLAARAHLLVVTINYRLGLLGYLTPGVRSAPVQAAGGAAVLDVAAALAWVRRNVAAFGGDPRRVTLAGHAAGAALVNAMLMMPDSKGLVSRVLLLSGSALSPTALVPDAALAREHTAQALRCTPETSNDENWFVECIRARPLAALLAVEAPRARFLAGWAPSVPVSRDAPSQGQAPTRALHASEAFLDCALAVVVATTESYQFFNEEDIRHGFEEEHRNRILRTYVRNV…
TnCOE24	MRAGRAALLAWLVCCAAALSSHKYSTRVVRTKYGPLRGIVVHSHPQVEAYLGVPYATPPLGSLRYMPPVTPSQWRTTRLADASGPACPQVPPAAVPRDDALLLHPRARIRQLERLLPVLANQSEDCLYVNLYVPVNGGEEGEGGGLPCLVFVHGESYEWSSGNAYDGTTLAANGNIVVVTINFRLGVLGFLKTGAKGSAQGNFGLMDLVAGLHWLRENLPAFGGDPERVTLMGHGTGAALANFLAVSPVARELLKRVILLSGSGLSSWALQREPLTIKRKVAEQTGCHGDLLEDDLAPCLRNKPLAELLAVRLDPPRFLPGFAPFVDGTVIVNPSAPPPTDSSRLGAGAAAVANAAGHELADFSHRELLFGLTTTESYLEFNAQDLEFGFNESRRDRIL…
TnCOE25	MPPVTPSQWRTTRLADASGPACPQVPPAAVPRDDALLLHPRARIRQLERLLPVLANQSEDCLYVNLYVPVNGGEEGEGGGLPCLVFVHGESYEWSSGNAYDGTTLAANGNIVVVTINFRLGVLGGSAQGNFGLMTWWRGCTGYGENCRRSGADPERRHTHGPRDRPPRLLTSWRFLPVARELLKRVILLSGSGLSSWALQREPLTIKRKVAEQTGCHGDLLEDDLAPCLRNKPLAELLAVRLDPPRFLPGFAPFVDGTVIVNPSVRLFKS
TnCOE26	MALRLYLFLIFAGFVAAQGPNPVVRVAHGLIQGTWKVSTKGRSFASFQGVPYARPPIGKYRFREPQQMKQWTGVWDATKPLPACLQYEPFKKSIVGSENCLYVNIATPKLNPGANLPVLVFIHGGAFMYGEGSFYDPSHIMDTDMVVVTLNYRLGPLGFLSTGDTIVPGNNGLKDQSFALHWIKNNIMMFGGNPDSVTLSGSSAGGASVHYQFLSPLSRGTFARGIAYSGSALAQWTHSIKPVEKAKALAAIVGCPTTTNKEMVDCLKYRPAEMIVNAQIEMFEWKVHMFTPFIPTVEAPGVREPFLQQYPYHATRAAAMMNLPLIASAEPGLLQDLEAHWDQLASNIFEYNDTLPLSRRAEVAAKIKQHYLGGKPVSQETYPQLVQALGDRHFVVAVG…
TnCOE27	MGNSTMSFIVRENRLLSPQDYLVQNRDPNNPDALFPGVLGGWREDLQGRERRDSRQLKRDVFVTTNYGQPPRQHPGWQLMQAVDWGPACPQPVRFTGLANLTEAGSTAQRYPVMVYIHGGQFSSGASNLFPGHMLAAFYNVIVVSINYRLGALGFLSTGDENSPGNYGILDQAMALRWVYDNITPFNGDRSSITLFGPGAGAASAGLLAVAPQTRDLVTRIIAQSGSALADWALIEDKFRVQNTSLVFGRLLGCPIDSSWKLPQVGFIPWGPVLENNFTFPGDEWYDGWRERDWHFLNEKPEDLILRRRFNPSLRYMTGVTTQEAAYVLYTNDSLAPNYEISESWFNQKLQELVLRYNYTLNPRGVFEAVRYMYTYHPEPHNLLSDFLYRAPTDKMVKL…
TnCOE28	MCLDVPEVPGNQGLKDQQLALKWVKNNIEAFGGNPDRITIFGESAGGKSVNLHLIYGQEKLFHQVIMQSGVAETTSSARGPDPSVPLKISEQLGFKTTDTKEALSFLSSIDTNLVIAAAIELNPAVELKLTYSPCVENDFDNVEKLIHDYPINIKKPNLLPTLLGANKDEALAKFAIMTAEEILQNPKIFFDYLNDYFNFNTEDLIEMEQIVRNFFHR
TnCOE29	MAKFRKRIVLFTLFVINLVDQPAPEVTIEQGILSGKTSTDGSFFEYVGIPYATTNSSSRFKAPLPPPSWEGVYQAIDEIYQCPQPSPIGIIGSEDCLKINVYVPTLSDSPLPVMVYIHGGAFLIGSGGKFIYAPDYLVKRDIILVTFNYRLGALGFICLGIKEAPGNAGLKDQIAALRWVKKNIAAFGGDPDNITLFGQSAGATSSSMLLASEATKGLFHKVIIQSGSSVSSWAINRQPLWVASLIAKELGYNTKDPYELYEIFSKTPYEKLLKAKPKKPLGMYFDTQMLNYPCVENVILGEEAVITDYPYNILSTKSKDIPVIYGTNSREGLFLLPDDSEKSLAERDARYIFASDLEFSSEDIAANLSKQLKEYYFGQDKINLENLYTISKLNTELYF…
TnCOE30	MVYIHGGAFILGDGGKLIYGPDFLVKQNVILVTFNYRLGILGFLCLGTEDAPGNAGLKDQLAALRWIKNNISAFGGDPDNVTIFGTSAGAASVSILLASETTNGLFKRAIMHSGTSITSWATSYDPLLIARKHAKLLGFDSKEPKELYDLFSKMPYEDLLSVLSAFTLVSIVNQKLMHVPCVEKSFPEIEPILTELPYNLITKNPKNISLMYSSTDKEGYFFVNDETEESLKMNNEKTMYGDNLIFKTEQEEKEVDRKVKEYYFGKTEISHNNIMNLSQLYTDIYFEVPAAIESEIYARNIDAPVYYYYFTYDGDRNLVKKSTKYKNEPGACHGDDLLYIFNGMILPYRIKERDQIIIDWMAKLLTNFAKYGDPTPNTSNDLPVKWVPHSKNKINILEI…
TnCOE31	MCASGNKFKNQGLKDQVLAMQWIKQVIGSFGGDVNRITVMGHSAGAMSIDLQLLVNEDFANKAILMSGVALSTWVIAPETNDIPIDIATELGYTGSDVKEAIEFLSDQSPEDVVQAAEKLGIMTSEDGHPLTTPCVETAEEGALLTDYPVNLQPKVKGMDIMIGHTNKEVMFVYPKPENTDYYRNYDFKTELASEFSEVLDVETVRQFYIGDEDVNENLQDEILDFGSDVAFVYPVQRSIEKYLNAGASSVYSYSFSYEGQRNILKVIMDLQSPGACHGDDLGYLFQFHELEGQEIVEEDQNMIDVMTRMWTDFVKH
TnCOE32	MKNLLLVLLLTTSCWAGQPRVDPLVSTARGFISIIFLLIFQPATPHPGFNTTFEANNDDTQCAQFDKTIFGTIQCLQLNVYVPNKAGSSHTLPVMVYIHGGAFLRGSKKHKQLSPKFLIRHDVIIVNFNYRIGLYGFLCTSEDRYKNQGLKDQILAFKWVKDNIAAFGGDVNKITAFGESAGAMGLDLQLLGQEKLAQRVILQSGTSLTPWLIGPEADNIPLEVANYLGYEGEDPCVEKANSDAILKDYPINLKPNVKGMDIMIGHNSQEVMFIYPNSDEEFYKNYKFGTELIQGECEIYLSQQTVRQFYLGDDQPSSLQQDAILTFASDFAFVHPSERNVLRYLEANAKSVYRYMFSYEGGRNLLKVKKNLTSAGASHGDELGYLFSSDTFPEVPDER…
TnCOE33	MKKLFLVLLITTCCWAGQPRVDPLVSTSRGLIRGLRAEDGDYDMFLGIPYAVVDENNPFGPASPHPGFDTPFDAYHDGVQCVQTAGNTVIGTLQCLQLNVYVPNKANSARKMPVIVYVHGGGFAWNHKGMSSQSPKFLIKHDVIIVSLNYRLGPYGFLCVSEPGYSNQGLKDQLLAIQWLKENIAAFGGDSNEITLMGQSAGAMCLDLLLYTNEKLAKRVILHSGNALNTWLVVPQNDSLAIQVAEELGFTGDGIKEALDYLSSSGPGQVVQTIEGLNTGRNALTRPCLEPEGEGAILTEFPENLKPKVKNMNIIIGHANKEMMFLYPNANKDFYNNFRFSQELIGSFDEAYDEDIVTQFYIGDEKPGEHLQDDILDYGSDFVFVHPTERSIDRYLDAG…
TnCOE34	MDIIIGHANKEIMFLYPDSDKEFYSNFKFGQELIGGLDAAYDEEIVKQFYIGDERPGEHLKDVLLDYGSDFMFVHPTERSINRYLDAGANVYRFVFSYEGGRNRNKNRKHLMSPGASHGDDIGYLFGMDMYQNQAITVKDQEIIDAMTQMWTDFVKYG
TnCOE35	SLVLVLLIIKCVAGSAVSREGPLVSTPKGQIRGVRGEDGDYDGYYGIPGILTDYPVNLQPKVKGIDIMIGYTNKEMMFMYPNADNLQFYRTYSFNRALLHDFDEAHDVDIVRQFYIGDEQPSESLQDVIIDYSSDASFVHSAERSVDKYLDAEASSVYKFIFTYEGNRNFGKIAMGLTAAGASHGDDLGYVFDAPLLAGPITDADRRVVDAMTKTWTDFAKYG
TnCOE36	MKSLVLVVLIITCIAGSAVSREGPLVSTPKGQIRGVRAEDGDYDGYYGIPYALVDEDNPFGPSTPHPDFEGIFDAVTDGVQCIQAANSPVTGVIQCLQLNVFVPNKPQSTGPLPVMVYIHGGAFLIGYKSEHSPRFFPKQDIIVVTINYRLGLHGFLCSSEHGFKNVGLKDQVLALKWIKDNIAAFGGDADQITLLGMSAGSISIDYHLHAAENFAQRAILMSGTTLTSWIISEENDEIPINVAKNLGFSGDDVKGAIEFLSTQDPNKVVEEADRLHYLVNEDGYPVIMPCVESNSDSGILTDYPVNLQPKVKGIDIMIGYASKEMMFMYPNVDDSQFYRTYSFNRALLHDFDEAHDVDIVRQFYIGDEQPSESLQDVIIDYSSDASFVHSAERSVDRY…
TnCOE37	MPCVERDSDSGILTDYPVNLQPKVKGIDIMIGYTNKEMMFMYPNADNLQFYRTYSFNRALLHDFDEAHDVDIVRQFYIGDEQPSESLQDVIIDYSSDASFVHSAERSVDKYLDAEASSVYKFIFTYEGNRNFGKIAMGLTAAGASHGDDLGYVFDAPLLTGPITDADRRVVDAMTKTWTDFAKYG
TnCOE38	VVVLLIIKCVAGSAVSREGPLVSTPKGQIRGVRAEDGDYDSYLGIPYALVDEEDPFGVINDEMPISLAKHFDYTGNDVKGAIEFLSTVNADEAVTAADRLDYVSDGRGYPKTLPCVETESENAFLTNYPVNMQPKVKGMDIMIGYASKEMMFMYPNADDVQFYRDYSFDFELLFEFDEPHGVNTVRQFYIGDEAPNENLQDEIIDYGSDRAFVHPAERSVTKYLDSEANNVYKYLFSYVGDRNILKIMLGLTAEGACHADDLGYLFDVPLIANVPRTEADQRIIDAMTKMWTDFAKYGNPTPESTELIPEWKPVDKKQRPYLNIDNSISLESRAFNKRIAFWDLYYKLHGDKVR
TnCOE39	MNIAATMFCFRKSFVICLNCRFFKISVGLSVLTGSPVSRHKQFTSKMKSLMLVLLIIKYVAGSAVSREGPLVSTPKGQIRGVRAEDGDYDGYYGIPYALVDEDNPFGPSTPYPDFEDIFDADTDGVHCIQASNSPVTGVIQCLQLNVYVPNSPQSNEPKAVMVFIHGGAFLVGHKSELSPRFLLKQDVIIVSINYRLGLHGFLCSSRPGFKNAGLKDQVLAFQWVKDNIAAFGGDADKVTIFGMSAGAMSLDYHLHATENLAQRAILMSGTAMTTWTLAEENDYMPIDIAIELGFSGDDVIEAIEFLSRVDPVEAVEAANRLHYLADEEGYPVAMPCVERDSDSGILTDYPVNLQPKVKGMDIMIGTANKEVMFMYPNADNLHFYRTYSFNRELMYEFH…
TnCOE40	MIGVANKEMMFMYPNADDTQFYRSYSFDRQLLHEFDEAYDVDIVRQFYIGDEQPSESLQDAIIDYGSDISFVHSAERTVDKYLDAEANSVYKYVFSYEGGRNYLKILFDLTASGACHADDLGYVFDPPEFAGNPVSEADQRVIDAMTKMWTDFAKYG
TnCOE41	MYPNADDTQFYRSYSFDRQLLHQFDEAYDVDIVRQFYIGDEQPNESLQDVIIDYSSDVSFVHSAERSVDKYLDAEANSVYKLLFSYEGNRNFGKIILGLTAAGASHGDDLGYVFDAPLLAGPITDADRRVIDAMTKMWTDFAKYG
TnCOE42	MIGVTNKEMMFMYPNADDTQFYRSYSFDRQLLHQFDEAYDVDIVRQFYIGDEQPNESLQDVIIDYSSDLSFVHSAERSVDKYLDAEANSVYKLLFSYEGNRNFGKIILGLTAAGASHGDDLGYVFDAPLLAGPITDADRRVIDAMTKTWTDFAKYG
TnCOE43	MIGYTNKEMMFMYPNADNLQFYRTYSFNRALLHDFDEAHDVDIVRQFYIGDEQPSESLQDVIIDYSSDASFVHSAERSVDKYLDAEASSVYKFIFTYEGNRNFGKIAMGLTAAGASHGDDLGYVFDAPLLAGPITDADRRVVDAMTKMWTDFAKYG
TnCOE44	MVYIHGGAFLIGYKSEHSPRFFPKHDIIVVTINYRLGLHGFLCSSEPGFKNVGLKDQVLALKWIKDNIAAFGGDADQITLLGMSAGSISIDYHLHAAENFAQKAILMSGTTLTSWILAEENDEIPINVAKNLGFSGDDVKGAIEFLSTQDPNIVVEEADRLHYLVDEDGYPVIMPCVESNSDSGILTDYPVNLQPKVKGIDIMIGYASKEMMFMYPNVDDSQFYRTYSFNRALLHDFDEAHDVDIVRQFYIGDEQPSESLQGVIIDYSSDASFVHSAERSVDRYLNAEANSVYKYLFTYEGDRNYVKLTANLTASGASHGDELGYIFDNPTRFANVPVTEADQRIIDAMTKMWADFAKYG
TnCOE45	MVYIHGGGFLVGHKAELSPRFLLERDVVVVTINYRLGLHGFLCSSEPGFKNAGLKDQVLAIKWVKDNIAAFGGDADKVTVFGESAGAISIDYHLHAAENFAQRAILMSGSALMSWILAEENDEIPITVAKNLGFSGNDIKGAIEFLSTQDPTKIAEEADRLHYLADEENYPVTMPCVERDSDSGILTDYPVNVQPKVKGIDIMIGYTNKEMMFMYPNADNLQFYRTYSFNRALLHDFDEAHDVDIVRQFYIGDEQPSESLQDVIIDYSSDASFVHSAERSVDKYLDAEASSVYKFIFTYEGNRNFGKIAMGLTAAGASHGDDLGYVFDAPLLAGPITDADRIVVDAMTKTWTDFAKYG
TnCOE46	MIKINAPEDPPSHDGIFKADNRYVFCPQFPSNDVLSAPSEDEDCLILNIYVPNFTNTTLPVMVYLHGGDFGVGSSSPVFYGPHYLISHEVIVVTVNFRLNALGFLNLGVKEAPGNAGLKDIRAALRWIQENIESFGGDPDNVTVFGQGSGGTAAIYLTLSQSCNGLFKKIICQSGTLFSPKSFDANPLATASQVAKSLGVNTLDPEELLNIYTDVPISKLEEAIGKQMNGKSVFVPSVENYLDSDPFLCDIPLNILTSDNFNPVPAVFGLNTVEGLACTLDYFTITSQIDRMKNEDLSVLDQRSFNATKDEKIEIRDLLKDTYFANISTDENVLGGFINMNSDFNYVGPMSLFVELYANNSDVDVYQYIFNHIGYRNLGRLLTNTSLPATTNMDELFYL…
TnCOE47	MLDIGGVSGEKFWDGDYYEFFGIPYATVPKGRDRYKAPLPVEPWEGVMGAQTRNIACQQVYLTEEEDEEVILDGVEECLTMNIFVPKIASEENLVPVLVYIHSGAFSGGSGNMGRFNYLARHDVVVVSFNYRLGAIGFACLGTEDIPGNAAMKDQVAALKFINKYISKFGGDPNKVTLAGFSVGASMAELLALSKSAGHLIDKLILESGSALSPFAVDRTPVNTARNLAISIGFNSTGTLEELNEFLLNANITDLAVESKKFFLTNSTFGIAPCVEREIENVEPFMTEPPLITLHRGDYKQLPILTGFSNMEGISRTIKLYDWMDMMNEDFSVFLPADLKIDDKKARDDLIADIRKLYFKGEEVSFDTLQGYVDYFSDSMFKYAIMKSARLHSVKSDMP…
TnCOE48	MRARSARRQCGVRPRPDMTPLRTLALLLCVYAAHALPCLSCDAEAPSCLSCKADAPLAHIDSGWLYGARRVADNGVAYASFRGVPYAKQPIGELRFRELKPAEPWDCLDARNEGPICFQTDVLYGKLMQPQGENNPSSVDKPQCRGQEACIHANIHVPLESLPHVDRDHCQVAFPDKAGSGLPILVFVHGGGFAFGSGDADVYGPEYLVSKKVIVITFNYRALLMSGTATSGFFTPSPLFAHLMSNNLLMWMGINSTDSEEIHRQLIELPPEKLCEVNSGLLEHIGLTTFTPVVESPIPGVETIVDDYPDVLIANGRNKDIPLMVGYTSDECETFRHRLESIDLVERIKQNITVIVPPKTLFTTPQELVLDVAKKIDRAYYNGTKSLDSFIASCTEGFY…
TnCOE49	RAGLAPLWAGIRESRTVNCKSASEAEDCLLLDVHAPSAVGGNWPVLVWVTGGSGPYQPGKLVQEGIIVVVVHHRQGPVGFLCLGNEKVPGNAGVKDVVLALRWVRDNIVAFKGNPDKVVLAGQSFGAAMVEAVILSSMATGLYHGAILQSGSALAPWAFNYDAEERAQALRISSNIDVVADDLTKLLLRSNIDDLVDKANKLDVPYFPFGMCIESPLKKEERLLSAAPFDLLLSKKGTSVPLVIGYNDNEAYVFISMLREARVFRRMSGDLSFLLPEELKFFNRRERKQIGRQIKDMYFKRNSTMAAVLAYHSVRHHVTTAPVFYYQFSYSGEVGVQQEPGLQKEGAAHSDELSYLFNEGDLEGEDGVIQRRLIKLWTNFVKHLNPSHESDVSWELSRP…
TnCOE50	IVTASEELKCDVRLRIESGWVCGLLRRAEDGGEYASFRGIPYAEQPLGQLRFKELQPARPWPHLLDATEEGPVCPQHDEIYEHLIDPHRGMSEACIYANIHIPLAALSLAQTRDNSSNYSEHGQQGVKKGFPILVFIHGGGFQAGLSDTDLHGPEYLVNKGIILITFNYRINVFGFLSLNNPKIPGNNGLRDQVTLLRWVQRNAEAFGGDPDDVTLGGQSAGAACAHILSLSNAAKGLFKRVILMSGTAIPSFFTSSPIYANLIASAFLAYLGINATSPDDIHDALIKTPLEDILRANTRIQYDFGLVSFTPVVEPPYQGVTRILDDTPTNLMIQGRGNELPFLVGFADQECEFFRRRLEYLKFLSRIKINPLLVLPARIPFSTLPNVALQLAEKVIKR…
TnCOE51	IVCVINRLLAYFSVGSVLLPNDDKKLPCDVRAQLDSGWVCGSIRPAEEGVQYASFRGIPYAQQPLGALRFKELQNLSPWKDVLLATEEGPICPQYDELYGRLVNSAEMSESCILANVHVPLNISSFGSKSESQDQPKLPILVFIHGGAFQAGSGNSDVHGPEYLVSKGAIVITFNYRQVLNVFGYLSLNSTKIPGNNGLRDAITLLKWVQRNALAFGGDPDNVTLGGHSSGAVNTHLLSLSEASKGLFKRVILMSGVANAGFYTASPIYAETVAQMFLGLVGINSTDADEIHDQLIQMPLEKIMEGYRVMQFQTAVVAFAAVVESKFDGVTQILDDDPTNLIKQGRGKDLPMIIGSTSNECETFKRKITYLNMVKLIEQNPAIVLAPQITYTVAPTRAT…
TnCOE52	LDKILFYFSVNCMLWPNIDQRYHANQRPQCDVRAQLDSGWVCGSIRSAEEGVQYASFRGIPYAQQPLGQLRFKELQPLKPWNGVLETIEEGPICPQYDEIYGRMARPTAMSEACIYANVHVPFNEYTSYNQTANYLPILVFIHGGGFQIGSSGSDIHGPEYLMSKGVIVITFNHRLNVFGYLSLNSTKIPGNNGLRDAITLLKWVQRNARVFGGDPDNVTLGGQSCGAVAAHLLSLSKASEGLFKRLILMSGVATAGFYTTSPSYAQMVAQMFLGNVGINSTDADEIHDQLVQMPLEKIMEANRIVQFKTGVISFAPVEERELTGVSRILDDDPANLIKQGRGKDLPMIIGSTTKECEFFKNRIIYLDLIGLIKENPSVALPVNMSYSVSANKSFDLYQ…
TnCOE53	MSWQIVLCLSAALVAATNLAQNTLEDDLQALPGNEPLIPPAEITGIINEQMGAINLIGNSEENEIIGETTTEEPEDTTTTQEPTTTKQGTTEKTKSITEDPSNVSQKLTITDNKVSPESGPEVGSNGGDEGNIEGDGDENNEVGGGGGDQEEGGSGDHNVGGGGDQEAGDGGDQEVGGSGNQEAGGGGDPDVGGGEGGGSNQEEDCGGGCTEEIGGAHPDAVGEAGGGGGAGDNNDPEAISAQSHQNIEDEVICEGVHAEDVTIETTTGQVQGNCWKDKPDIISYIDIPYGSFNMFEDPVPPKKLDSIHEQKVHEKRCPQMEGNTYVGHKECLTLSIFKPLEATDASVLFHIHEGYFSMGSGNPAIYGPEHLVLKGVILILPNYRLGPLGFLCLHNTTA…
TnCOE54	MGSAEAAITTAGVVFIVSAMSLLCKVEGRLTPAPRVYRDAATLQGAVRGYLAPNSPHFEYFGVPYARPPTRRDRFKAPKPPPEWDGIFEATHKVKCPQAIADGEENCLVVNVFVPEEAESRPVIVFVHGGEFQNGVGNELDYEYSLIDMDPIKELKKGNFHKVPMLITYTDLESTGIIENVMENIGIPPKRFGYLLPNNLEFGEPIVKYKVGRIVKEFYFSEDMPRDKVAKSYAYYMYDIFTEYPMVKMAMLFAAKNTYSVYVMKFNLAKESETEEAKGFNSVLDYLYQDDEQVDEIIIERLMMLWKNFLKISDPTPLITTLIPLVWQPLSCESDEQTIIDVPVLLFYTNVKMSTPSEHQRLLFWDNIYNKFYKPHVVVQEVPQVDDNG
TnCOE55	MRVGGGPLVFTQLGVLRGRKLVTRTTSQIPYYSFKGIRYAQPPRGSLRFRPPAPLEPWTGVRDALEEGAVCPHRFMLFDTYKGDEDCLFLNVYTPALYNPKLAVMVWIHGGAFAMGSGNAFLYGPDHLVGAGVVLVTLNYRLGALGFLSLENEEVSGNMGLKDQVMALKWVRDNIEAFGGDPGRVTIFGESAGAASVHLHMLSPASQGLFHAAIAQMVSPLHRGRWHRSRAHEPSSSGYLRATPSELLVKAGARLSSSPGKSADLQSTVALPFLPALEADGPDAFLTRPPAETLPGADVPFLTGYNAQEGIILFRRLQRYPKLLSELESEFRRVVPPELLGNDTLTDTISDAIRTFYFQQRPVDTRNVNNLIDLFTDVMFLRPVLETVRQQVESNRTSP…
TnCOE56	MWIQMKRYLRSLLSLKWLVLMSLCAARMVPQPSAPLLLSGGLVRGHIAEDGSHVRYLAIPYATVTHRFQAAKPDPKWEGVYDAIDEHVRCKQRFTSNKISGVEDCLTANVYTPLPQSDSLLPVMVFIHGGGFRDGSGSPFIYGPRHLIKHGVILVTFNYRLEVLGFLCLGIKEAPGNIGLKDQVQALKWVKKNIKGLGGDPDNVTIFGESAGSSAVAYHLLSPMSQGLFNKAILQSGSALSPWALQFEPVKTARLLAAQMGYKVEDPQEIYNIFKRSKAEDLLKHRVPREKGDIVLSENIFVPCIEKSIAGVETFLPDNPYTLLSEGKYNKVPVIIGYNNREGYYFAGKENDTTLFNIDFKKALPRDLLFPTEKEKMTAAKTFNELYMKGEKISREPSA…
TnCOE57	MTRCTVFLLSLALLALVSLCAARKLQPTAPLLLSGGLVRGNIAADGSHAQYLSIPYATVTHRFQSGSAIAQWALQFEPIKTASLLAAEMGYKTEDPLALYKFFNSSDADDLISHRIPREKGSTIISQYVFVPCIEKSIPGVESFLSDSPINLLSKGQYNKVALIIGYNNQEGYYFAGRENDTALLEIDFYNALPRDLVFPSNMQKIKTAQTFDELYMKGETISNEPTALLKYAHYLGDVGVKYPVSATIDLFLKTLNKPVFAYQFTYGGLLNLAKIAFGFRKYPGATHGDELFYMFSMPAQLNVERDMVEKMTTFWTNFAKYGEPTPDSSILPKWEPAEVQDPQLMIIDKECVMAPVWGDEYIGAWNDTYSKYRKTN
TnCOE58	MKWLVLVSLLAARLVQQPTPEVRTRSGLVRGTVSRNGLFYQYFGIPYATVDERNRFQAPLPPPPWAGVFEAVDENTWCPQNSGGITIGEPNCLKLNIYTPTHISKPLPVMVYIHGGCFFSGTGSPFMYGGDFLAEHDVIYVGINYRLGVEGFLCLGIKEAPGNAGLKDQIAALKWIQENIEAFGGNPNDVTLFGESAGAVSTSFMMLTSSTKGLFHKAILQSGSSLAPWALQHDPIGSASALVRKFGYNTNNPQEIYKILSKKTASELLEAVTRNEDKFCVAAQHLFVPCIEKPLEGVEPVITEYPADIIKSGNYTKVPMIIGYTDKEGIYFVAADHGTSVKNNSAVMDPVRSMREDLEFPTEFEKNYTIDTIRRHYFSDPTPVVTPLTPVRWRPSRRH…
TnCOE59	MKCAKLLVLLWCAQCVRSLFVRTPVVQVSQGALRGRRGLSGQNRYYGIPYAVSERFQPPKPPRKWNGIFEAVSRFDSCAQAFAIFKLGSENCLVLDVYTPGQAIRGQKLPVLVFFHGGAYYYGSKWHYDPEFLVKKNVIVATVNYRVGALGFLCLNNVANLGLKDQVAALKWIKKNIAAFGGDPDNVTVSGHSAGSTAAGMHLLSRQSAGLFHKAILMSGVFLSPWAFNCDPLTPAVEDAAKISTVRSDVDVYNTFMNTSVNDILTATLGTSIDPKYFKYSPCMDRNFTDPFFHDTPYNVITSGDFNKVPMIVGFTDLEGFLFYALNNQRTLEYLDNNFADSLPSVFSWCSKKDKRIIADKIRSHYFGKQRISSKATIKGAVDFYSDWIADPTPVQTPW…
TnCOE60	MVQVKVTEGFLEGELVNNEFGGQFCSFKGIPYAQPPVGDLRFKAPQPAKPWDGIRSAKEFGSVAYQHDMFNMYPPRGGEDCLYLNVYTPELRPDKPLPVMVWIHGGGFMSGSGNDDIYGPEFLVRQGVILVTFNYRLEVLGFLCLDTEDVPGNAGMKDQVAALRWVNKNISNFGGDPDNVTIFGESAGGASVSHHLVSPMSKGLFKRAIAQSGVTTASWAKTFKPRERALVLARQLGYESENEEGLYEFFKAVPIESLIHKQTPISFAEQECSCFQLYFGIVCEKKFGNDERFFFDRVSDNLENNCIHEGVDVITGYTKDEGVLIYAFGELAKMIKQANSLSTYFTPKHILENLPLSDQIAVGKKIRNYYMSNKNRKQDWEKLASYFGFEMFIYPALKW…
TnCOE61	MFFDKGARNGSEDCLYLNVYTPDVNPEKPLPVMFWIHGGGLISGSGNDDFYSPEFLLRQGVVVVTINYRLEVFGFLCLNTADVPGNAGMKDQVQALRWVNKNISNFGGDPNNITIFGESAGGGSVSYHLISPMSKGLFQRAICQSGVSLCHWMHGYYPRDKALALARKLEFYSEDDKELYEFFKKQPKEALVEINDVPFTLFELTGQPSVEFNIVDERKFGNNERFFYGDLMDVVSNGTHEGVDIMTGYTADEGMLALGIIKDLDKVLFAARNLPQVFVGEEVSLNLSVKDQIEMGKRIRNYYFKNQAKYNWKDLARFYSFDLFVLPALRWIKLCSRTKKNKTYLYKFTCKTERNITSNLMGLGHLLQGEIVVAHGDELINPTPDGSLGVTWKPYTIEN…
TnCOE62	MVQVRVNEGILEGEKVANDFGKPYFSFKGIPFAQPPIGNLRFKAPVPPKPWDGVRSAKEHGPNCYQNDIVFGQGLVGSEDCLYLNVYTPDIKPNKPLPVMVWIHGGAFISGSGNDDFYGPEFLLRQDVIVVTINYRLEVLGFLCLNTEEVPGNAGMKDQVQALRWVKKNISNFGGDPENVTIFGESAGGASVSYHLISPMSKGLFKRAIPQSGACLGGWSYGHRPFERALALARSLGFYSEDPKELYEFFKNQPIESLVSATPTIALHETARVGKDIYFNIVDELEFGNNERFFYGHVYDQVLKGIHEGVDVMTGFTTDEGLVSLGFGEVLSKKLEMVMKYPESLVTRPLSNALSADQLIDLGKEIRQFYFKDLAKISDDWESLVNVYSMDLFVYPTIR…
TnCOE63	MLLWTLILLSAVVSSFGDEAEWREVKTFQGTVRGRRDPEGGLYGFYSIPYATAPRGADRFKEALPGPVWLQTLDAVDKRIICWQAKTKYINVENQTMHEDCLHVNVFVPDTEEKKLPVIVIVHGGGFAIGYGNMMPIKQLVKEKKVIAVTFNYRLGVQGFLCLGTNDVPGNAGLKDQVALLKWVKKNIARFGGNPDDVTISGGSAGSISVNLLMLSNSAKGLFHKVIPESGASVSSIAVQIDPLANAKAFAKRLNFTEVDDFHALKAFYKTTPLEELMLDVISPVKDISNLFSACVERKTGSSVFLTDSPINIIKQGKYKKLPVLFGISNMEGSIYVDYFETWKNEMNEKFSKFLPIDLQFENEEEKDEIARRVKQFYFGPHPVNNQNILAYVEYFSDV…
TnCOE64	MNIAMLLRIVTAVAVLALCRCDEGEWKEVRISQGVLRGRKDPEGPYAFYNIPYATAPTGPDRYKAPLPPPTWSQPRDAVDEQVACFQGKTPYATVDTMKEDCLIANVFVPKTKEKNLPVMVYVHGGAFEMGSGNMWTPKYLVREKNVIVVTFNYRLGVQGFLCLGTEDAPGNAGLKDQVALLKWVQKNIASFGGDPDNVTILGFSAGSISVNLLMLSKSAEGLFTKVVSDSGVSVSSFATQIEPLEKAKNYARMLNFHDVDDFYALKAFYKNTPLKSLVTGTFFDIKNVSLIFYPCVERQTDKEAFLTEAPINIIRNGNYKKVPVLVGVDNMEGLVQMSNFERWKSDMNENFSDFLSVDLQFGSEKEKKEIAQKVKEFYFKGKPVSDETVLDYVEYFGD…
TnCOE65	MLLRIVTAVAVLALCSCDEGEWKEVRISQGVLRGRKDPEGPYAFYNIPYATAPTGADRYKAPLPPPVWSEPRDAIDEQVTCFQGKSMFLTEGTMKEDCLIANVYVPDTQQKKIPVMVYVHGGAFELGSGNMLPPKNLVREKNVIVVLFNYRLGVQGFLCLGTEDAPGNAGMKDQVALLKWVQKNIASFGGDPDNVTILGGSAGSISVSLLMLSKSAEGLFTKVVPESGVSVASIATQIDPIENAKIYARMLNFHDVDDFYALEAFYKNTPLESLVMGTFLDIKNISLIFYPCVERQTDKEAFLTEAPINIIRNGNYKKVPVLVGVSNMEGLLQMLNYERWKNDVNENFSDFLPADLQFESEKEKNEIAQKVKEFYFKDKPVGDETVLDYVEYFGDVMFA…
TnCOE66	MPDMVLDGQVLEQEDCLVANVFVPDTQEKNLPVYVVVHGGAFVIGYGAIVSSSRLLENKDIILVNFNYRLGIHGFLCLGTDDVPGNAGMKDQVAALRWVQENIASYGGNPNDVTLGGYSAGSASVDLLMLSKSAEGLFHRVIPESGGNLAAFSVQRDPIESAKYQARKLGFNNVGDISALEEFYKTASLEKLTSDAFMERPDSTFLFGPCVERETDSEAFLTESPLSILQKGSYKKLPILYGFANMEGLFRMNLHNEWKEKMNEKFSDFLPADLTFESEAKKEEVANKIKKFFFDDKSVSTDNVLSYIEYFTDVLFAYPMLWAVKKYVEAGNNEIYLYEYSFVDENTPLVPNTNVKGADHCAQTMAVVDGDESGESIEMQTMRKNIREIWRNFIKTGIL…
TnCOE67	MLSKSAEGLFHRVIPESGGNLAAFSVQRDPIESAKYQARKLGFNNVEDISALEEFYKTASLEAITSDTFIDRPDSTFLFGPCVERETESEAFLTESPLSILQKGSYKKLPILYGFANMEGLFRMNLHNEWKEKMNEKFSDFLPADLTFESEAKKEEVANKIKKFFFDDKSVSTDNVLSYIDYFTDVLFAYPMLWAVKKYVEAGNNEIYLYEYSFVDENTPLVPNTNVKGADHCAQTMAVVDGDESGESIEMQTMRKNIREIWRNFIKTGKPSSEWQPARADRSPYMDLGVKIELKNEPLLGLRNELWDDIYSKHYLDSVPPSTPPSGEDWLELDTPQGPVRGRKDPDADLYVFYNIPYATAPVGVNKYRVTTPTST
TnCOE68	MPKHMVMQEDCLIANVFVPDTRKKNLSVLVYVHGGAFVMGYGEMFSGKRLIEKKDVVLVTFNYRLGIHGFLCLGTDDVPGNVGMKDQVALLRWVQKNIASYGGNPNDVTIAGYSAGSASVDLLMLSKSAEGLFHRVIPESGGNLAAFSIQRDPLEIAKDYAKRYNFTEVDDIYALEKFYKTAPIEWITEDTFFDRHDSTFLFSPCVERKTTDEAFLTESPLSILQKGTYKKLPLLYGFAEKEGMLRLWSFEYWKHMMNENFSDFLPADLHFKSKDEREAVADKVKKFYFGDKPVGDDQILNFIDMFSDIIFDYPMLRAVKLHVQAGHNQVYLYEYSFVDEDTPLIPYTNIRGANHCAQTGAIMDGLNMTHLDESSITPAMKNMKKIMRGIWHNFVKTGK…
TnCOE69	MPLNLMPPGLVEQDDCLIANVYVPDTRKKNLSVLVYVHGGGFVIGYGNLMKFKQFLETKDIVLVTFNYRLGVQGFLCLGTEDVPGNVGMKDQVALLRWVQKNIASYGGNPDDVTIAGYSAGSAAVDLLMLSKSAEGLFHRVIPESGGNLAGFSIQRDPLEIAKTYAKQLNFTNVDDINALEKFYKTAPYELLHSDSLNDRYDSTFVFSPCIERETTKDAFLTESPLSILQKGSYRKLPVLYGFDDMEGLVRIHFFEDWKHKMNEKFSDFLPSDLKFKSEEERQEVADKIKKFYFGNKPVGNDNILSYVDYFSDVLFTIPMLWAAELYVEAGNNQVYLYEYSYVDETTPTVPHTNVRGADHVAQTYAVMDGLNIYNQNKDITNIGFQIMKKTVRQLWYNF…
TnCOE70	MKLWTCVLLLCAAAVCVTCEQPPSDEDWLELDTPQGPVRGRRDPDADHLYVFYNIPYATAPVGKDKYKPPLPAPVWKTPFDAVDKHVKCPQMMNNNFVPMNLVEKEDCLIANVYVPDARKKNLSVLVYVHGGGFIMGYGNLFKFKQFLKTKDIILVTFNYRLGVNGFLCLGTEGAPGNAGMKDQVALLRWVQKNIASYGGNPDDVTIAGFSAGSASVELLMLSKSAEGLFHRVIPESGGSLAVFSIQRDPLEIAKTFAKLLNFTNVDDTNALEEFYKTAPLELLNSYLSTESYDSNFLFSPCIERETANDAFLTESPLSILQKGSYRKLPVLYGFANMEGLVRIYYFEDWKHKMNEKFSDFLPADLTFKSDDEKHEVADKIKKFYFGNKPVGNDNILGF…
TnCOE71	MFLWVISGGVSGSGRSGGMRVVLAALTALAARALAGPHEHRARHHAPEHAPHFPAPAPPQPYRGHGEAVRYNPELDTILPRLEDHETSSKHAKFEDAETSSKRAKYDERFYSNHERADEELMADEPQLGPEDDDPLVVRTRKGRVRGITLTAATGKKVDAWFGIPYAQKPLGDLRFRHPRPAESWGDEILNTTTLPHSCVQIIDTVFGDFPGAMMWNPNTDMQEDCLFINIVTPRPRPKNAAVMLWVFGGGFYSGTATLDVYDPKILVSEEKVVYVSMQYRVASLGFLFFDTPDVPGNAGLFDQLMALQWVKDNIAYFGGNPHNITLFGESAGAVSVSLHLLSPLSRNLFSQAIMQSGAATAPWAIISREESILRGIRLAEAVHCPHSRTDMGPMIECL…
TnCOE72	MDTHKLSLHICNSIKQYMVNVDIVTEIVKLHNNKINNLKRKLTLKLGLQEKLKLVLLLILLMTQNSNCNGFGGRNSMLRTRVIGTRYGKLQGVILPMDQHKYLKPVEAYLGVPYATPPTGSNRFAPTRAPAPWDDVKTVDQMGPVCPQRLPDISNETLALERMPKGRLEYLRRLLPRLKNQSEDCLYMNIYTPVQVGPTLQAKYPVVIFIHGESFEWNSGNVYDGSVLASYGGMVVITINYRLGILGFLNANPIPHLKARVANYGLMDQIAALHWVQQNIALFGGDAGNVTMLGHGSGAACINFLMISPTVMPGLFHRSILLSGSALSSWALVEDPVSFSVQLAKQSNCTLPEDIVKDHELIVDCLREVPLEELMSAEISTPSYLTAFGPSVDGVVVKT…
TnCOE73	MNRHFNEKGVKYHNGKQNDAPEDNYEDHDTAHNPDVNFDTNPYYNSENFLHLNTKFYNTENNAYSNYEDYKKYYLNPSNPVPKSNVKFSPTRTPSPWDGVRVSDRPGPACPQKLPDIDDERTILEKMPKGRLEYLKRLIPYLKNQSEDCLYLNIFAPLQMDETKIALPVLVYIHGESYSWSSSHPYDGAVLASYTDLIVVTLNFRLGVLGFLNANPAPHLKARVANYGLMDQIAALHWVQQNIALFGGDPTNITLMGHGSGAACINFLMISPTVMPGLFHRAILLSGSALSSWAIVDDPVYYSLKLAKHMNCSVPEDLTKDHEIIVDCLREATIEELLSADISPPNFLTAFGPSVDGVVIKTDFAKDFLTMYSTGDFPSFGPLNNMNINLNIHKKRSDS…
TnCOE74	MLINKMATNRHATSFINHNMFICIFISLLLPMANEGAANVYGDSRNFPNDDGGKRLTREYHLRQGALRGLIVKPSRQYDLQYVEMFLGIPYAAPPTGHLRFMPPVSAPPWPGMKMATRFAPVCPQSLPHIKKGNPPSSGRQHYLNQLKTFLTNESEDCLYLNIYVPYREQKTKKFPVLVFIHGDSFEWSSGNPYDGRMLTSYGNVMVITVNFRLGILGFMKPSLTEHVYGNNGLLDQLAALQWIKDNIEDLNGDPNSVTLMGHGTGAACVNFLMLSPISNGLFHRAILMSGSALSDWAMTKDPTPYTLQVAQSLGCNPTSKNMMACLQKKPLSEIKKVQILAREFETPLGPVVAGSFIPSEPAKTMESYPNLLSKYQLLSGVTEMERYHDFGVIELEHG…
TnCOE75	MLILMIMYFITLPVLTSRFVRGDTTMDEKQPQPLISSRVVRTKYGDLRGFIVTPESRFLEPVEVFRGVPYASPPVGSLRFMPPVSGAQWPGVKIAEDFSPVCPQVLPDIRNETAVLKRISKGRLEYLKRILPFLTNQSEDCLYLNIYAPAQAGVRDAVARYPVLVFVHGESYEWSSGNPYDGTVLASHAGLVVVTINYRLGILGFLNPRSDEYPRSPANYGLMDQIAALHWIKENVAVFGGDPTNVTLMGHGTGAACVHFLLTSLAVPEGLLFHRAVLMSGSGLSPWSLVADPSKYAALVATHANCSPELTPPALLRCLRERPLEALLSAPVQAPDFAYAFGPSVDGVVIDTGDLLVNPENGYEWGGQTVAHAPLGKQAQNAINIINAVLMRKSAVAQL…
TnCOE76	QKIEVTVKQGKILGSREATVFNKRLYFIFYRVPYAQLPTEELRFKDPVPHKKWPRTVDGRIQFHGTCAQAHIVHKDGLFGVEDCLYLNIFTPEIPKSEDAKLKPVIVWLHGYAFTSSFSHLHGADFLIDNDIVLVTVTHRIGVFGFIKLNDTDSHANMGLKDIVMALKWIRTNIKHFGGNKKNIVLMGNNSAATFITLLMMTDASKLFSKVILQSGAIYSASMFQSNFTLERRRLKRDLKKKGLKLSKATTKELVDASRNIYSRSEIENFQRPIVPFTPVIEPESKSALLTRAPTDFYNAMKSKKFNKPVLIGFNTQESISEAIPFIHNPSFLKPLSKLFKFMVPFQDGCWYNSSSQKYKHISNKIKNTYFKTGISEKSLDNFLRYTSDLIKYPIIKFI…
TnCOE77	MVMFIILLSLFSAVYAQDAVTVVTGKGPIQGYKKDGFNTFFGVPFALVNEENPFGSTLPYPNFKTPFNANDSSIICPQVYFNDNGVIQCLRLNIYVPTSSAKKPLPIFVWFHGGGFAFGSAGEYGGQYLVKHDIIVITVNYRQGPYGFLCLNDPSVPGNQGMKDQIVALRWIKENIGAFGGDPNKVTIAGESYGGGAVDLHLYSKYETLFQKAIVQSGSLYVSEGIFVKADYEAAIKLAKQLGHNAGNTRDALKYLARANPVDVSAATRNLSMILTFCKEKKFKGVQNFITDDPYHLPNNDRVKNTPIMIGYTSQEMLYEFVNKPKEFYDKLTIGFQDQLKKTFVLKKKELDMLSGIVRSFYLGGKAIGPESQLELSDFVSDFALNYGAEWSVNRYMEQ…
TnCOE78	MTVIKRSLECRTLKLMRRILLGLEYPTFETPFLAYDSSIICPQVTSKVGGILQCLRLNIYVPDTDDDDSPLPILVWFHGGGFVFGSAGDYGGQHLVKHGIIVITVNYRLGPYGFLCLKEPAVPGNQGFKDQVMALKWIKAHIAAFGGDPNKVTIAGESYGGGAVDLHLYSKYDVLFDKAIVESGSIFTPGFFVKRDTKAALKLAIYLGHNVNRTKSALQLLAKENPLVVMSAARNLGLKLSACKEKRFKGVRNFVTKYPNCLNNAARIKNTPILFGYNSKEDFGTFASKPKQFYDELGNIFYNNLRNNTDINDMELEVVANITRKFYLGSKDVGPDAMLELTDYLSDFKLNHAAETSVNMYINQGAKVYKYLFSYIGGSIYSNVTGVGAMHTEELKYLF…
TnCOE79	MSNSENPVVAVKQGKLKGSLKKCLDGSSYYSFKGIPYAQPPVGKLRFKDPLPVQPWEGVRDASEHGPVCPQYDMVTADFVEGDEDCLYLNVYTKNLQPGSKIPTMVYVHGGAFLSGSGNSETYGPEFLFKNDVIIVTLNYRLEALGFLCLNTPDVPGNAGMKDQVLALRWIKENISKFGGDPDNITLFGESAGSAAVTAHMLSPMSQGLFHRAIAQSGVCLSYWSIAHNPVERAFRVGKVFGFDTDNPYKLADSLRSLPVMELAKISMKVRTEDEKYRGLPIYLTPTIEKKFDGVESFLTEDPMDLLLAGKVQKVPLLLGYNSGEAMLMVNDHVRKIDILNKEPSYLLPRDVATKVSREKMIELGARVKEYYVGNKDFSKDNVRPIIDLHTDINFTYQM…
TnCOE80	MWKSFSKFVVLSFVLTLSDVSCEKAPVVRTPLGDVAGYYMTTRGGRQISAFTAIPYALPPIGDLRFKAPVPINQWENTLNASTVSPVCVQRNPYTRQEEIVGQEDCLYLNIYTPTRNNDVSDTSLLPVMVFFHGGGWMCGDGTTGMYGPHFLLDRDVVFVATNYRLGPLGFLSTQDEHCPGNNGLKDQQEALRFIQNNIESFGGLFHKAISESGTALVPWAEAAPGEALRNAFRLAKFLDCPQAPSENMISCLRTKDSYDIINTEFLFYAWDYEPMTPFKAVIEPDHPGAFLRRSPRKTPNVPAVPWMTGLNKDEGCLKSVWITSNTSRYNEFMSAFETIAPVTFYYENSPYAEAITEKIRQKYLNDKDESALKNGILEMYSDSYFAYPAVDAVEKVFS…
TnCOE81	MLLLFSIASVLSLALGQLQTPEVTIRQGKVIGSVASDGRYYEFHGIPYADSTSGIHRFKAPLPAPNFQSDFIANRKDIKCVRPLGVGYEGTEDCLVANIFTESISVTSQLPVMVWIKGKEFDKTHEEDLSFKNFVDKGIVVVSLNYRESVLGFLCLGTENAPGNAGLKDIIAGLKWVQENIAQFGGNPNEITLFGHGSGAAAVDLVTLSPMAEGLVHRAISQSGNAMAPWAVSRDNLKYAIQVAEGLGHVVTNVKELSNIFTRTSVAALMGIINELELTDNSLAFSPCIEKPDLENVEPFLTKTPKQIIDDGTFLQIPVIIGFVHNEGTIRAEEAFNDDWLTRMEESFTDFLQPDLQFSGDADEASVAERIKHFYFGDDSINLSHIGQYIKYHGHTMIM…
TnCOE82	MLKLGVWFITIYGLIFNISAQDPVANLPQGRIVGIKAYTEGSVTPVEIYYGVPYATPPKGRYRFSAPERHVGWRRTYFAHRIPPHCPHIGDSDTDNYSEDCLYLNIWTPRRSDGKTLPVVVILYSETWTEAGISLPCQELAADGVVVVTVMYRLHLLAFFTLRSISARGNLALLDQYLAFLWVRDNIAAFGGDPTAITVLGHSAGADSLLYHITSPRSVGLFQRAIIMSPFDIWKALDEQNFIGVTEVERISREIAHSLGCKSNKDQEILQCMRERPLSDIMALYSNETWSRAMQPISDSFLPSSEQFLPRSLLAALSVSKFENLQLDVMLGACDLEGLRYNDDEYKILMKRGKSYLSDYANRKVIPNSLRLLSLDRLDGLPMLSQAVQWEYLIDKSRK…
TnCOE83	MLKESTVLCFYFVLITCFFKEASTILFSSNSLEIEIPQGKLRGSYSWLENQNKFLGIPYASVRERYEAPGPPPTWSGTFDANRSVKCKQYFSALRTPVGQEDCLVLNIFTPTSVNTPLPVIVFIHGGGFYWGYNTKLIYNPRYIVQENVIVVTINYRLGAFGFLCLGLKEAPGNAGLKDQVAALKWIQNNIAFFGGDPNSVTLVGESVGAASANYLLLNNEAKGLFHKLILQSGTVMMPQGFIYNPLESASKVASGLGYNTSDPTELLHIFKNSTADDIVRASDFDQRNDVFAPYLFKPCAEAESSDKPLLTKEPMELLKNISLTIPVIIGYNDREGIYWATQYDFFRTLEKVRENFDHIIPNYLQFGQRSDKESFTNDIFAMYFRNSTATDGLIDYFT…
TnCOE84	MPLVKSEQGVLKGVVCSDVENYVAFKGIPYAKPPLGELRFKAPQPPEPWEGVRDASQHGPVCPQYNERMNRMEPGDEDCLYLNVYTKSLTPTTPLPVMVWIHGGGFYTGSGNSDFYGPEFFMAHDMVLITFNYRLEVLGFLCLDTEEIPGNAGMKDQVLALKWVKKNIAAFGGDPNNITIFGCSAGAGSVSCHLISKMSDGLFNKAICQSGVCLNEWSYNTYGRQRSFQLGKLLGKDTDDPNELLEFLKSVPASSLVNVQLPLLELKYNDILDGILFGPVVEKVGLDKDKFLSENPIDLVKNGHIAKVPLILGYTSGEGIEIARKFPYIADFILTPGAVVPKELKLKWAPEKVQIADERIRKQYFNGNQITSDLLQEYTNFETDRAFLYNIIRYARYHV…
TnCOE85	MNRSWLCVALALVTVCAPAQAVVGGAPASPPEPDAAVVFTQRFGFSSRIEGHKDDKLGYYSFFGIRYAEPPLGPQRFQRPVRRYLAGEMMATNQCPPCPQPDPYQPRRIIGHEDCLCLNVYAPKMPATEQGSPVVFFIHGGNYRTGSTGPYGVRINILYNISGQHLAQKDTILVTAQYRLGSLGYLSTGQRDAGGNLGLFDLHTAMVWIQDYIQFFGGDPKRVVVMGQGSGGSAASLMAMSPEGRSASGVAALSGTPLSPGAVRPDPAKHAEALAERTGCPKAPAESLLICLRKLPVEELVQADEDLNMDMVDTQRFLEEISGRSGAGARVEGKDDLRGLPPLVAEAPAESLNKEQKRVPFLTGVTKAETSRAVFGKFNKFLTNQLQTVTDFLKKDVIG…
TnCOE86	MRVRWWRAVLLCACALVVRSDALPPATLGDVVANAATSLNSMKAVPARAARLVHALVDRMRVGGGPLVFTQLGVLRGRKLVTRTTSQIPYYSFKGIRYAQPPRGSLRFRPPAPLEPWTGVRDALEEGAVCPHRFMLFDTYKGDEDCLFLNVYTPALPDKMSGYNPKLAVMDQVMALKWVRDNIEAFGGDPGRVTIFGESAGAASVHLHMLSPASQGLFHAAIAQSGVAVAPWALAQEPRARAFELGRELGIDTNSTAELLGYLRATPSELLVKAGARLSSSPGKSADLQSTVALPFLPALEADGPDAFLTRPPAETLPGADVPFLTGYNAQEGIILFRRLQRYPKLLSELESEFRRVVPPELLGNDTLTDTISDAIRTFYFQQRPVDTRNVNNLIDLFT…
TnCOE87	MSLWSVKWLVLWSLWAARLVRQPTTTHHLSNGPVRGSIAPDGSHASYLNIPYASMPQRFLAPGPEPKWDQTFEAVNENSDDELILTRVPRKPGNIIISEILYTPCTEKVIEGVEPFLTESPYDLLSKGEYNKVPLMIGTNNEEGLLLFSADNETSILKVEIEKAIPKNLEFPSQTEKIKVAKELERLYLEGEKLSLETMTKLVKWYGDPYLISPSLEETEFLLKSSEHPIYNYLFSYDGWRNLPKLVRAGSVGNFPGATHADELFYLFSQHIVFSNFEKDMIDKVTTLWTNFAKYGDPTPEGSSLQVKWNPTNATTPTCLVIDSDFSTAPLWFNDRLKYWRDVYSKYRRKR

## Sheet: F
ABC transporters
Clade	Name	T. ni	B. mori
A	ABCA	6	6
B	ABCB	10	8
C	ABCC	13	15
D	ABCD	2	2
E	ABCE	1	1
F	ABCF	3	3
G	ABCG	16	13
H	ACBH	3	3
	Total	54	51

## Sheet: G
ABC transporters in T. ni
Clade	Gene name	Peptide sequence
A	TnABCA1	MSSFDKLKLLIWKNFLLQRRHKWQTIFEIASPVIFSLFLILTRCLVDPKSKPDVSYPPFAPTYFNMTGRNLGNLTTAKTGTLAFSPDNELTRTVTRNAITMVADENFLILLAYLFDSDMPKPKGFKNAKEMELALTQPNVMNQILVGIQFDDSMANATEWPDDIKVTLRFPAVMRTPMVEHPLRASWRTNLLYPLFPRPGPRDPDDMYGGKTPGYSPEMFLAVQHAISQEIIKQKAGKPINTKVYLQRLPQLAYREDQLLAALERFISMIIMLCFAYTFVNTVRVVTFEKELQLKNSETMTIMGLPSWLHWLAWFIKQFSFLLISVILIVILFKIPFNHTVAGDGYSVLTFTPWTVLFFFMVLFVIASLAFSFMISVFFSRANTAASFMGLAWFSAYSI…
A	TnABCA2	MLLRTVRKSKVKALDNVSFDCYKGEVTVVLGVNGAGKTTLMSIITGMYSPSKGAVFINNKDVTQKLRELRETIGFCPQYDLSFSYLTVKENVQFYQKLKTTKCETDMTTEQLLKKLRLKDKAHLFTQNLSSGMLRCLQVACSLVTGAKVLVLDEPTSGMDVEIRHHLWDLFMVLRGTKTIIMTTTCMEEATALGDRIVILNKGQLRCHGTPLFLQQALGVSCNLSVTITDSTHMIHLIDLVQVIVPHVEHRIEDIHRVTFSLPSEDRDKFSQLFKVLESNKDSLGIMFVDVGMYMEEVFL
A	TnABCA3	METRVLSVLMWKHGVVRIRRFIHTIVDLVSPLLFFLLLFAFKSSLQVSLPNEIQQRNEVAHTDELPLTETMLAPYWILYYPDTPLTASLMDDVGPKLNLKRLTHFPEDSDRGYYPYSNETQLSELISKMRLLEAIVIFHNMDGETWPGRLNYSIRMKDMFKTDSFESSDDTPGPHRMFGMNYGTFMRIQWAVDTSYIKLLTGTEVPVSLTLQEFPYYHTQRDSMALLICSLLMAVCYLSLMLNFVFLMCRLLEERTSGIQARVSLNTLGLSHFLNALPAGLVFSIGGTILLKVTDKPIIANSNGVLIFILLLLYFNTVMSMAFACSYVSRGTRYAATLSVMSYVVLWLPMRLLYNKTKPYWATLATGFCPHTPMHCTNNPSVIVSYFFLILQACIFYFV…
A	TnABCA4	MKMRREARPAGAIMKFRLLMWKNFLQQWRHRLQTITELLLPVLTMTLVLVLRWQMEPITVGTLTYPPLPAHTLNYSTAVLAGMNLTQMSIAYSPKSPVLEDVVRTGITNLLVANAKDLIPVLIDNISIPGLPGIEFPPDFDFNSTAIIEVLKSRIKIDPYNNSHELRGLYVQEDSTRKVIAGIEFDDKLFGAEDLSNNLSFALRFPERPRLNSFFQRGGRTWRTDIVFPLFEMPGPRFAYSWEGGNDPGYVNEMFIALQHVISNELISRATGEDLKSFRINIQRYPHPPYIQDLAVDVLQFMFPMFIMLSFSYTAVNIARAVTVEKELQLKETMKIMGLPTWLHWTAWFCKQFLYLLVTAILIIVLLKINWFTNEDGFSEYAVFTNTPWTVLFFFMILY…
A	TnABCA5	MSGSHGVAEARDDGRDSPASTEQLTKCGVKGTSELDCVAIGSRLRGAMGTRPPAKFWPQLWATIEVLVPLYSMGVLIFLKMLVPNPNFPEMSKPGPLLRIHHDAFPENHSVAVVADWQNANGTMGFLDEINAMLAESHQQPINWINGTPTTRALYTSQAKCRVRSSSTESDWARGGQLIPLSEMNREDTCPVDTDSPIPPPRIDLRQFPKRQHTGDWLVIFRVIMPMYMVMTLSQFITYLLMFVVGEKEKKIREGMRIMGLKDSVYWGSWFLIYAVFVTVLSIVSTVLLFTLKVFQHSSYILIFLLMLLFGFTIITFAFMLTPFFDRARTAGILGSFAVNLMSGLYFIQVFVSNADSLAFWFVSLISSSCYALAMDKALVLDMAGVGVTWDNLWTGPGV…
A	TnABCA6	MAALLPAIQENMGGVGELLANETLFQSLRGFSSVGNLLSSPDFLSSAGNMLCGKPFVMSTNRFYKSIAATPDLSTEPDKAQLEVLPTEFCRSLYVDIINVEGGKILWSFVKPLIMGKILYTPPSASVTRIIEQANSTFATMIKMTNLVHSFAASFPALGKLSDHREGIAVLRRVMTEPQFSSIRAMIIGEGEEGATDIGSLLSKASDLLHCINLDRFQPSPSEDHLIHEAARLSVVNEFSAGVVFLNSGEQDGSLSNVEYKIRMDIDNAPTTEKLKDYLWIPGPEASFVENMRYFRGFVQIQDLVDQAIIRLSSRARVKRDLQEVDWAVYTQQTPYPCYRKDYFQTSLYESQSLIVCFFFSLLFTVASAVRFIVSDKETGNTMLIVPPLSWFVWCALEM…
B	TnABCB1	MFQPRIMLTFMEVPRRVNMDQLSSPEERSKLLPPGVTGPQKDSENGWKQKPGDTDIRHRIPDLDKGEFTKDQNVDTNSEPEEKDDEVPSISFITLFRFATTMDKCFMFFAIIFSMIAACSTPINTLLLAFLLEAMVEYGRSVWEGAPNTDQFMQDLLWFAIYNSITGALLIVLSYAATTLMNIAAYNQVYVIRQEYLKAALNQDFGYFDIHKNGDIASKINSDVVKLEDGIGEKLATFIFYQASFISSVIMALVKGWKLALLCLISFPVTMTLVGVAGLVASRLSKKEAVASGKAGTIAEEVISAIRTVYAFSGQNQETMRYDEHLKDARKINIKKGLFNGLAMGLLFFCIFCAYALSFWFGYQLMQTDDYDVSTMIAVFFGVMTGSANFGISSTLMEV…
B	TnABCB2	MNVTALNQVHKIRQEYLKAVLNQDFAYFDRHQTGDFASKMTDDVIKLEEGIGDKVSAFVYSLTTAIGCIVMAMLKGWKLALLCLTTTPVTFLLVGLTGRIADRLYKKEAEQTGRASAIAQEVLSSIRTVYSFNGQQKELERYKKPLAAAKKIYIKKEFFTGLSMGCLFFCIFGSYAVSFYFGIYLVINDPANYNADVMFSVFFGIMTALGNLGMVGTLVRSFGLARGAGAQIFNLLDTVPTINPLLERGFVPNMAEGSIELKNVVFQYPSRSNVPVLKGVSLSVKRGQSVALVGHSGCGKSTIIQLISRYYDVSSGSVCVDNIDVRELSVRWLRSQIGLVRQEPVLFNNTVRENIRYGREDASDLDIQAAAKQANAHQFIIKLPKGYDTLVGERGASLS…
B	TnABCB3	MFRCQAAQGRTTVVVAHRLSTIRHVDMIYVMKNGEVVETGTHDELIANKAHYYDMVSVQEPQELAGREEKARITGKESKLSETEDEEELAPMEDEKQPEVPRVSFWRVMAMKSKEWKWMVAGTICSVVIGFSMPLFIVIFGDLFGATGQRIGICLQGVGSIGLALCLAMMFEYRVGLVALAFLPLVVFVVYQQSKAINQESFGNAKCLEESTKIAIEAVSNVRTVVCLGREAMFVREYVRALAPALRVATRAAHCRGLVAGLSRSIFNFVNAAALTYGGHLIVAEGVAYEDILVTTQSLQMASGQAQNAFTFAPEFQKGINAASRIVALLNTKPLICEASLKDVEFRYPSRPGVRVLRGLDLQVDKGKTIALVGRSGCGKSTVMQLMQRYYDPDAGLVA…
B	TnABCB4	MEKRRHQENVSLLTNQVNGKQPPWDDKHEKTYTKPMKNEHAWEKITDLDLKESLELKKGKDIQEKRDLGIPTAEYRLIQFRYGTCLEVTATIIGIFLGILSGGGLTYNLVQVGELSTAFVERTAFQEQLSSPMPLLSLFGGGRVLQNASHEENMAALVEDATALCIGAFVSVGLSLLCCTVAITTIRMLFLRAVLRQDQAWFDTDSEFNVASKMSENLVKLKDGMGDKLAIVGNLVGTSLISIAVAIPLGWELALACITVMPLCVAASVALSNYQTKSSARELESYSQAGKHAEEIMKSIKTVAAFAGESKEVEKYTKLLQPAEQYGRKRGLYTGLGSGFNWVLTYCLNAIGLIYGIRLVLQDRDKPEEERRYVVGIVFSILFNIYMATQSITMCVPHI…
B	TnABCB5	MGTKKKKEQKKEPEQRLSYYQIFRYATCTELLATLLGILFGLASGGGVCYNLVQIGELSTAFVERTTYRERLTSYLPLTSTFGGGRRLLNASYAENMAALIEDAKAMAIGLFLSIGVSLIFCMLSVGLISWSALRQRNDNSINANKELDSAQCLTNLMALKEGMGEKLAVVSNLVGTSIICLCTAFPLGWELTLACVSVMPFSIAVSIALTNYQTKSSMLEMESYSQAGKQAEEVLKSVRTIVAFNGENKEVDRYTKLLQPAEKQGRKRGLYTGLGNGFNWVLTYSLNAIGFTYGTRLVFIDWDKPDDERKYLVGVVYSILFGVYMATQSITFCVPHAEVFAAARGAAASIFQLIDREPKIDSLNNSGLSPRRILNGFSLRIKAGECVALVGSSGCGKS…
B	TnABCB6	METDDIEMEIATRRGSNPRMGRSDSNRSFTRHRKMSSGLSMNYNMHGWRQNSLTINTIAQNSAYLAEKLMVDQGEEDKRLAAPVSWLQLYRYATPLEILLLLFALFLACINGLFVPVGVIIYGEFTALLIDRTIMTGTSTETWTISMFGGGRILTNASREENREALIEDSQAFGIGCTVFSIGQFIVGAISVDIFNYMALKQVDRLKALFLKAVLRQDISWYDLNTSMNFATKVSDDIEKFREGIAEKVPIFIYLVMSFVTSVLISFCYGWELTLVILSCAPIVIATTAVVARIQSSLTTQELRAYSVAGVVAEEVLSAIRTVVAFGGEKKEIDRYARRLEPAKKMGTRKGIFSGLGSGVMWFIIYATYALAFWYGVGLILDSRHEEKPVYTAAVLMIV…
B	TnABCB7	MLQRLIYNSIELKLSGRQHLLFSIPNKAHLCHQCGSRLNSRYKVPDLLNYYKKSFYNRNGLFNLKLRCYSTQVDAPKTKEQILDPITEKKTLNSSKKINVKLKTSELKRLFDLAKPEKWTLTGAIGFLIVSSSVTMAIPFSLGQVLDIIYSSTTDLATARAKLDTLCLMLCGVFLVGGLCNFGRVYLMSISGQRMTQALRRQVYAGILRQEAAWFGRTSTGELVNRLSADAQLVGRNLSQNLSDGLRSLFMVGAGTGMMFYMSPSLALIGLCVVPPVSMLAVIYGRFVRGITRQLQDSLAETSELAEEKISNIKTVKAFSKEQRECETYGQRIDNLLKLAYKESLAVGSFYGLTGLAGNTIIILVLYYGGGMVATEQLTVGNLTSFLLYAAYVGISIGG…
B	TnABCB8	MWQLMQMQSCQLVRQRLLTSNSNVYFANIIKNKPSNVVKRYISEVKTSSDKSTKSGLLLLCSPWKLCVGVSLGLGARLLWNNGPAYCKAAQHTRIIQRRPNVQEDSAKFDWSKFLDYLKPHKLLLAAAVASALIVAFLNVYIPAMLGEVVNVLASLRQNPSMDFIEQIRLPALKLISLYIGQAVFTFFYIHLLSQVGERVAADMKQDLFQSILDQDMSFFDQERTGELVNRLTVDVQDFKSSFKQTISGGLRAITQVVGSSVSLLVISPHLTGLTLLCVPSVVIEKSTLVAEEAISNMRTVRAFAGEENEAKIFAQECNAAAELSMELGLGIGLFQAGTNLFLNGMVLGTMFLGGHLMSSGQMSAGDVMAFLVNAQTVQRSVAQLSLLFGSVVKGISAG…
B	TnABCB9	MMEYCPPNVTLAEIWVDHGISQCFMETASAIFIGGFLFTFGLIQIVMYKRYATEVMDVRTSRLFAVQLSFTLFVPVLAVIRFLLQAFVFKGGYIYGYMIVALVITLLVFPLSAYLAVLERRFLLPSVPPRGHGFVLLVFWTLIFVSENLSFLNLNKEGWWWHLKNLQDRLEMALFVGRYVSCMIMFILGMKAPGIMHQFEYLEVDDDSRRNIPPRDDNRSTFRNVFTKLRTLLPFMWPRKSVCLQIYVFICVLALLAGRAVNLFVPIYSKKIVDSISIPPLAFRWDLVAIYVFFKFLQGGGTGGMGFLNNLRSFLWIKVQQYTTRELQLELFKHLHDLPLRWHLSRKTGEVLRVMDRGTDSIDNLLSYILFSITPTLIDIVVAVVYFVSEFNAWFGLIV…
B	TnABCB10	MAALLLSRKKLPKLIRNNIKFTKSYSSTISKVIINGPQLNLGWRHCAVAINHRDYSSKPNASTGSDTAKNVLAAVLANKPKTGKIPVGIQKRDCFHPGASVLSREDINLGDAKPVTGVDMIRGMMEYVWPKENLAIRARVMLSLSLLFGAKMMNVTVPFLFKYAIDEVNTVSTAPGADALLGMATVPQAVGTTAFSLLLGYGIARATAAGFNELRNAVFARVAQHSIRKLACNVFTHLHNLDLTFHLGRQTGALSKTIDRGSRAINFVLSAMVFNIVPTIFELTLVSTILGLKGGIAFAGIAWCCVGVYSAFTLAITQWRTKFRVYMNKAENEAGNKAIDSLINYETVKYFNNEKYELRKYDDSLKKYEEASLKTASSLAVLNFGQHAIFSGGLSIIMI…
C	TnABCC1	MAPWSWLAAAAFHVALWTRRSAAPILYLAIYWMLATISAASILWQHSIANASSTHIELYLQGVSFLMTLLIATVDCVCFYDEVTKRFRNDLKSSEAPNICYQHNDTHFYSKVTFFWLNPLLYKGYKSPLEPDFLGELPDDERSIKYYKKFVKIHQERSKVSKESSPNLLTCYIRAVWPNFYIAGILKLLGDLIGVVPPLGLAIIIQYIEGYGHDRNEYDQDSPVTLGEFFSSGYIMLVITTIALISQAFLSQNSTHLVTVEGTRLKTALQSLVYDKCMRLAPWTSTDSNDDEESRLLHDTEDSSSTRTGLITNLVSQDTYNIMSCVWIVHYIWAIPLKATVILYLLYTKLGVSAIIGTVVSVLVITPLQFYIGKKLSDNSKEISKCTDHRISKMTEILH…
C	TnABCC12	MDPGYFDIERKQNPRETASLFSKFCYWYTRPIFAKGRKGQLSISDVYRCTPGHRATPRGDAMGIEWKKQLEKRDKGKEPSLLRAIIQAYGLKFIIANIIYAIVDAAIRLSIPMCLEGLINYFSPSHAGIKPNEAYLYAIGVVGFMALSASLVHPMLLWLLDMAMKVRVACGSLIYRKLLRLDLTAGGKASEGLAGHVVNLLTTDAQRFDMASLFMVDLVRTPIESTLIVYLMYRQIGVATLIGASLSGGQRARISLARCVYQNADVYLLDDPLAAVDAKIVAQGTYHELKNGVAEFEKLIEMGEKVEEEKQKQKATTYENSENVVYNVMVKADRADAKRSEHSESQKKGSVDNSVYVSYIRSGGSTLSMALLILLFLLAQLFYSSTDCLYIYGGLIATC…
C	TnABCC3	MESKVNLTEKNPQDRVNVFSKLFLTWSFSLFKRGYKQGLTVSDLWQAREADSSGRLGDRLEEAWEYEIEHAKKKGGDPSLSKAIFLFCYRPLVPYTLAIFIDYFSNEKTPEAYREAHIYNFLMNLVSMTSAFLMNYLQLLQGRVGMRVRIACCSLMYRKPGQVINLMSNDVSRFDLVTNFLHYLWVTPCVVPLVSYLVWQHVGYATLAALTLIFVQTIFVQGFSSALAVFTERFILFVTITTFVYINGDVRAQTSFSLVQYFNLLQLTCNIAFPMGLAFLAETKVSIRRLEEFLLLEEKEPEQQKSNILLDASRLSLANGKEKEAKKVKEISKPSELSIKNVTARWVATDDASTALRNITLTATPGEFVGVAGPVGAGKSSLLHLILGELKETSGTVNL…
C	TnABCC4	MESKVSLKQKNPYEESNFLAKIFLTFSFSLFRRGYKQGLTVNDLWRALDADQSGRLGDRLEEAWEKELDTAKRKGVKPSLSRAIVSSFWVEYMLCGLLVGLLFIFLWPLIPFTLALFINYFSEDKTPEAYRNAHIYNFLLNFLSIVTALILNHAQISQGRVGMRVRIASCSLIYRKILKLDRTGLNKTEPGQVINLMSNDVNRFDLVALFLNYLWVMPIVVPVVSYLVWQHIRWAVFAALLVIFVQTVLVQAYLSNRQGVLRGKIAKRTDERVKVMSELVNGVQVIKMYAWETPFEKLVDRLRKLEVGFIMSTSMIKGFSTALSVFTERFILFSAIVAFVLIGGDIRAEIAFSMVQYFNLLQLACNIFFPMALAFLAETKVSIRRLEEFLLLDELQSLK…
C	TnABCC5	MTENMGTKTEEKSGSKSSPPPEPKQVPNVLSRSFFCWVFPLFYFGNRRDLEEYDLVPPKQDYNSKFVGDQLERVWHEEEKKARMQGKQASFTRVLIKTFGWSFVPGGLMQFLSIGLKTISPLLFSELLKYWSVDSEMSRDTAMTYALLMILSNWLSSYANHHGLLFCQQFGMKLRVATGSLMFRKIMRMSNGSLGETTAGKVVNLLSNDLQRFDLATMFLHYVWIIPIQLAAVVYLGYLQAGDAALIGFASLVIIALPIQGVLGKALGAIRLRTAEKTDERIKLMSEVINGIQVIKMYAWEIPFQKVVGEKRAKEMSEVVKGTRLRTVFIGFMQFTERSALFITVLMFVLFGNSMSANVFYPLQQFMNAAQINITLFLPLVITFTAELYVSLGRVQEFL…
C	TnABCC6	MSSLSSTLLVNPDVWNYWFEEVERALRQKRDPSLWSALWRAYWMQFMPAAIYVIIITVARTTQPLVFAQLLSYWSVERPLSRYDAGFYAFAMLGLNFIALMCQHHNSLFVFRFGMKVKVACSSLLFRKLLRLSQVSVGEVAGAALTKLTAVIRRSTAVRTDKRIKLMNEVINGIQVIKMYAWEKPFQRVVKVARAYEMNALKKSMFVRSMFIGFMLFTEKSIMFFTILTLALTDTMISATIRIQSFLILDERSDMQITPKIVGANTNLVNSKKRNSEPGDVLPKKYVPADLSVSKADETVQSDYPIEINRVSASWTNSDKPEEMTLKNISMRVRKGKLCAVIGPVGSGKTSLLQLLLKELPLTDGTLNVRGKVAYACQESWLFPGTVRENILFGLPYDV…
C	TnABCC7	MGFHFRYWFEEVERALRENREPSLWSAMWRGYWLQFMPSAVLILIITTARTAQPLMFSQLLSYWSVDSTMSRYDAGFYAFAMLGLNFLALMCHHHNSLFVVRFGMKVKIACSSLLYRKLLRLSQVSVGEVAGGKLVNLLSNDIARFDYAFMFLHYLWIVPFQAAVVLYFLYDAAGYAPFVGLFSVVILILPLQAALTKLTAVIRRSTAKRTDKRIKLMSEIINGIQVIKMYAWEKPFQLVVKLARAYEMTALKKSIFVRSMFLGFMLFTERSIMFITVLTLALSGTMISATIIYPIQQFFNIIQLNVTLILPLAIASFSEMIVSCERIQSFLILDERSDMQVTPKVVGKNRLFNSKNQLEPGDVMPKKYLASDMSVSKQEETAQCDYPIVINRVNASWT…
C	TnABCC8	MVSGNKDPSDLKKVPPKNREKKTNNYKRANIFSKTWFVWMMPTFWRGYKRDLYDADLTKPKDSHLSDKLGDRLEKKWLEEIALASKQGRKPSLLRAMTKAFWMSYAPSGVMFLIQALILKPFQPVALSLMLTYWEPGSTMSYEQAVYCATSVIMMSLFIAFLNHHGTYSTQQFGMKVRIAACSLIYRKVMRMSSGALAQTTAGQVVNLLSNDVNRFDYAFIYTHFIWLLPLQVIVVCYLIYLKIGYAAIVGVIGIVLQTIPVQSYMSKLAARLRMRTACKTDERVRIMDEIISGMQVIKMYAWEKPFEQVVALARKNEINCITSASYLRGVYLSFMVFTERLTLYITLLSYSLFGYQVTADIVFPLAQFFNTLQGTLSIIMSNAVSFLAEALISVQRLE…
C	TnABCC9	MIWTLETFKLGYSRDIKDSDLYAPLPEHRSNVLGDAVQKAWDREVQNCRRRGDRHKPSLWRVLIKVFGVELMLYGLILAAMEFIVRLQQPLFLGLLLRYYSPVQDDSVVSNSTYLGRLFSYYDMEGSVSWGEAVFFAFGIIFCSAFNIMVQHPFMMGVMHMGMKMRVGVCSLIYRKALKINIQAMTENSGGLVLNLMANDVNRFDTGPIFAHYLWIGPTETLLMTVYLYREIGMAAVYGSLIIIAVIPFQIFLGINTAYYRRGTAIKSDERVRLMKEIIMGIEVIKMYTWEKPFRKIIDVVRRHEIFYIKMTSYIRGVIMSFIMFTSRFGIFITVLLYVTYVNRITVENVFFLTCYYNITKQTMTLYFPQAVGQIAEMNVAIQRIRDYLLSEECSLPPR…
C	TnABCC10	MESVNKKGRPPHPRAKAGPLSALTFTWTLPIFWSGIKREMEEQDLYEPLVEHSSGPLGDKFARLWEDEVRRAGAKRKPSLLRVILRAYAARCMLYGFVLLFMECGIRIAQPVFLGKLVEFYSPGHSMKREEAYMYAGAVVLCSALNVFVVHPYMMAILHMGMKFRVACCSLIYRKSLRLSKTALGETTVGQVVNLLSNDVNRFDVAIIFLHYLWIGPLATVIITYFMWVEISWAAVVGVGFMLAFIPLFGKTYFSSAIKNGATDRRTCTAHERNLIRNTSNKDVHMGETICGSSRQSEKIRATSYIRGVLTSFIMFTTRICLFCSILAYVLANNVISAKQVFVVTSFYNILRQTMTVFFPQGIAQVAEATISIKRLQNFMMYEDTSKPVPGLAEIQTST…
C	TnABCC11	MLWRWEDMCGPQGLRPWNDVTKDFGQCFQELFFHIPVYFLIAIISGYYVGYRKDWVVREKTQERAIVFRSFVVLALVFIPIIELYVLITKPGFVLYPVDYFSAGAACLAWLFHFGYVLALKHRLGQSSRGPTSQLMMWSFTVVVNLITLRSNIMTGSTLGFNIATLCCHALYFVSLLPSSNSRPTFYSPCLVGSQHSHSEYTPLLPHMDEGILGTAMQGNSWLSKLLFSWVDPLLQKGLENKLHDPEELFDVPAKYCCSYVGAKMDRSLIGNVDNFQQYEDVPHEPFIGSGYGATGETATQPPVSTPVTPTLRVLVRSPRRQNVSLLRALHSCFGLQFYSIGILKLVSDMAGFAGPILLNYLIKFVEDESIDQHLGYVYAGSLLAATLMSALFNTHFNW…
C	TnABCC2	MNDSETSTLLMPLNSSMDHFCGSVFWNSSLTWYSDNPDFTPCFQKTVLVWIPCMFLWLAALIDGYHIYSSKEFNIPWNKLNISKLIIICLLCILQIVNICQVAYKSKSDEIKVFDVDYYDPGIKLLTFILSATLVYYNRKYGIQTSGVLFIFWFLLILAGLPELRSNIVNYNTSDDVYVRYNIFSYIVYYTLNIIMFVLNCFADLPPRNTPYIYGEVQSPEKTSGFPSKLTFSWFDPLAFTGYRRTLTKEDLWPLHPQLMSKEVVPKFNKFWQKSLKKQEVSSKSSARTSVTQGKRKQETKPVSILPVVCLAFGGQFLFAIFLKVLNDILIFASPELLKHLIGFIEGKEPMWRGYAYAVGMFVCAILQSLLLGQYFFKVYTVGIKVKNSLSSVVYKKAL…
C	TnABCC13	MSYNSSLDSFCGSVFWNSSLTWYTDNPELTPCFQKTVLVWTPCLYLWVAAILDTYYILNSKERNIPWNMLNISKLFITCLLIVLKFVDLGVTVHTSSQGEIEVFNADYYSPIVKILTFALSATLLYYNRKFGMRASGVLFFFWLLLIFAGLPQLRTQITEHYYLTDDENVQYNFVSYMVYYPLVVLMFILNCFADLPPRDSPYKYDKNLCPENASGFPSRLTFSWFDPLAITGFRRSLTEEDLWALNPQDSSKEVVPKFDKFWEKSLKKREIANGTKATYRKTSASVNFKPETEKKPASILPSLCLAFGGQFLFGALLKLFNDCLMFLSPQLLKLLIGFVQGDEPIWKGYLYAVALLACATVQTMLLAHYFTRMYLVGMRIRTALTSSIYRKSLRMSNA…
D	TnABCD1	MGQVCLTCPNSELVMGVTHGNFGKTHQQTDVTKNGKLQTVENGTANGDKCGGRCGAEQCALCRGDADTDNKQNIEDADETQSIEEYVPGLNLEFLRQLISLAKIMVPGVRSHEVALLSAHTLCLFTRTFLSIYVASLEGSIVKHIVQKDMKRFAALLMQWFGIAVPATFINSMIRYLESRLALAFRTRLVNHAYDLYFKNQTYYRVANLDARIENADHRLTEDVSVFTQSVAHLYSSLTKPCFDLLLIVLTLATYSNKMKGNIFIGPTIATIVICLTGQLLRLLSPRFGALAGEEARMKANLRHVHARLIAHAEEVAFYGGHKVELGQLQNAYQELVAQMTSVFNKKLWYVMLEQFCMKYVWSGTGMVMLALPILTSRAKKDGSNSISDRAEYMTTSRN…
D	TnABCD2	MAPNFSKITSRTDVQIALAASAAVSAWLIRNSLNSSKRKNARQSNRPSPEEQIQYMIKDKNKKGPKAQVDARFLSELKTLWNIMMPSIWSKECGFMALIAFSLISRSMCDLWLIQHSTLIEGSIITMNHKEFRRLLTQFFFAMPIISLVNNVLKWSIGELKLKLRTNLTLHLYQQYLKGFTYYQVSNLDNRIANADQLLTTDIEKFCDTVVDLYSNISKPMLDISIYLYRLTVNLGASTPGIMMAYLLLSGVLLTYLRRPTAKMTVHEQKLEGEFRYVNSRLITYSEEIAFYQGNHREQLTLLASFYKLTRHLRNFLNFRVAMGFVDNIIAKYIAITVGFYAVSRPFFAVNHNLLTTGTENDRFKHYYTYGRMLVKMAEGIGRLVLSGRELSKLAGLTS…
E	TnABCE	MSRNRHHEETDKLTRIAIVNADRCKPKRCRQECKKSCPVVRMGKLCIEVTPNDKIATISEELCIGCGICVKKCPFDAITIINIPSNLEKHTTHRYSKNSFKLHRLPIPRPGEVLGLVGQNGIGKSTALKILAGKQKPNLGRFADPPDWQEILSHFRGSELQNYFTKILEDDLKALIKPQYVDQIPKAVKGTVGQLLDKKDERKNQPEICRMLDLSHIRDREIAALSGGELQRFAIAMVCIQNGDIFMFDEPSSYLDVKQRLNAARTIRSLIHPDKFIIVVEHDLSVLDYLSDFICCLYGVPGAYGVVTMPFSVREGINIFLDGFVPTENMRFRTESLVFKVAESATEEEIKRMNHYEYPEMSKFMGDFSLKVHPGEFSDSEILVLLGENGTGKTTFIRM…
F	TnABCF1	MAQCGDFIKSQFPLIDDELMKYVEDILDSSAGEFEDTEEVYEAVGEVLQGISEKSEQDIRDICEKLLHMLQPDKPGSSNGPRRVLDAPVHLASMTTTVTETEDLRSIWINTRDDNLKVDAKKLEKAEAKLQQKQQKQKDSKLPVTAPVLQTATASQVTSKKDSKLEAKGTNRTQDIRIENFDIAYGDRVLLQGADLVLACGRRYGLVGRNGLGKTTLLRMISSKQLKIPSHISILHVEQEVVGDDTVALQSVLECDTVRETLLKREKEVTAAINNGSTDTTLSTELSEIYAQLENIEADKAPARASIILSGLGFTPDMQARATRTFSGGWRMRLALARALFSKPDLLLLDEPTNMLDIKAIIWLENYLQNWPTTLLVVSHDRNFLDTVPTDIMHLHTQR…
F	TnABCF2	MPSDAKKRAQQKKKEQASSRNKKPVARVTNEENGSASNGDAKEPRELTAEEALCLKLEEEAKMNSEARSCTGSLAVHPRSRDIKIANFSITFYGSELLQDTLLELNCGRRYGLVGLNGCGKSSLLAVLGRREVTIPAHIDIFHLTREMPASDKTALEYAQEQLMDVYDRLEDLSADTAEARAANILHGLGFTRDMQQKATKDFSGGWRMRIALARALYVKPHLLLLDEPTNHLDLDACVWLEEELKHYKRILVLISHSQDFLNGVCTNIIHMSKRRLKYYTGNYEAFAQSKEKTLAKMVAQGLTEKVIDDKILNFYFPSCGKVPPPVIMVQNVSFRYNDSGPWIYKNLEFGIDLDTRLALVGPNGAGKSTLLKLLYGDLVPSTGMIRKNSHLRIGRYHQ…
F	TnABCF3	MSKKKGNKKNQDFEDEFDEKKTANDTHELTSKSKGKGKKKGKGNAGDWSDSDEGEVQKKHQASDDEDVPKPAAKKSQKKAKNKKKGQESDEEQDDIKTPSNVANTAAKSSAKSSKKKKGKGKKDEDWSSQGSDAELKEVSEEEIAKPVSKKKTKNKKKNIEAESSEDEDHDDSKSVVSNVSSNQAKPAAKSKSKKGKGKKEDWPDEESDKELKIEPSDDEEEIPVAIVKSKGKHKKKNNMDDIEAELKKFEIKETEPEVEAEPVKSKDKKKKSKKEEIAEPVEEEAMEEDDKVTELSEEKEAAEPAEKKMSHKEKKKLKKQQEYEKQVELLTKKGGQGHSDLDANFTVSQAQKTAALENAVDIKVENFSISAKGKDLFVNANLLIANGRRYGLVGPNGH…
G	TnABCG1	MFQQRKQLLRNVNGAAYPGELLAIMGSSGAGKTTLLNTLTFRTPSGVMSTGTRALNGQPATPEALSALSAYVQQQDLFIGTLTVKEHLVFQALVRMDRHIPYAQRMRRVQEVITELALSKCQNTVIGIPGRLKGISGGEMKRLSFASEVLKGLAHKGKTVVCTIHQPSSELYAMFDKLLIMADGKVAFLGSPEQANGFFKELGAACPPNYNPADHFIQLLAGVPGREETTRTTIDTVCTAFARSEMGCKIAAEAENALFYERKISSGWADAAWSEAVSLRARRSPYKASWCAQFRAVLWRSWLSVTKEPMLIKVRFLQTVMVSILIGVIYFGQHLDQDGVFCSELPIFIREHHSGMYRADVYFLSKTLAEAPVFATIPLVFTTIAYYMIGLNPDPKRFF…
G	TnABCG2	MTALMGPSGAGKTTLMTALAHRSPVGTIVDGDIAMNGTPLGDFMHQESGYMHQDDLFVDNLTVIEHLTIMARLRMDGRTSSLARKRRVNQLLRQLSLYGSRFTLIGGLDGRKTLSGGERKRLAFATELLTDPGLLFCDEPTTGLDSSSAHQMMSLLRASAAQGKTVICTIHQPNTELMAQFDKLVLLAEGRVAFAGTSTQALEFFKSLGYHCPLMYNPTDYFIKVLSLTPGSESASRQAIKNVCDRFAVSDAAKELDMEIHLEFHLMDNEGSIRAAQREPHDTFQPPFFLTKLWWLIYRYLLIVIRDPRVQFVRIIQKLAIALTAGLCFMGTARLTQSGIQDVQGALFIIIAENTFSPMYSVLHMFPEEFPLLNRELKAGLYSAPIYYTAKMVALLPGL…
G	TnABCG3	MKDLELKLPTRNVLTGNIVNWDDDEIGLGDAPGNLTLSWKDLSVYRKKKTQTSIWKSAVYEEIRVLHGVNGIVSSGNLVALMGSSGAGKTTLLAAISRRDKSAMTGYLMLNGRLAGADLISRISGFVPQEDLAIEDLTVAEHMEFMARMMMDKRATKMVRARRVQLMLSELGVNNCDKTKLKDLSGGERKRVALAVQLLNDPPILFCDEPTTGLDSWGAAAVVSRLRKLAIGGKLVICSVHQPASGVFELFHQVVLLANGRTAFHGTIEQADEFFASLNYKCPLGFNAAEYYISILGVEVDKEAESRLRIRRICDEYSRVKVNYFVQFYWLMWRNVQALKRNYSIWVAEFVLLMFVGTIISVPYYGHFEDLDQRDIQNVEGLLYLTIAETIFLFIYAVF…
G	TnABCG4	MELDTYDKIDNDVVIRIKNLKVWTPEEKSWWRRKPTKFSGCLRRNEFAAIIGPSGAGKTTFLVSLAGKCTLPSEGSVTLGSRNVKDCQGAVEIVPQHEVFMDGLSVIEHLVFMTEIKLGSCRDLRNRTMLDSLMEEFQLRVHKDTPIGALSGGEKRLLSLATTLLSNPQILICDEPTTGLDSYNALLVIGVLKKLSAAGRVVICSVHQPSCDLFKEFNTVLLMAEGRLLFHGAKDECMDTFQSIGLNCPTNYNPAEFYIRAVSKSNTNIQKLVEISENRLEVDGTGPIRPDPVSSYNKTVQRNWFKQVYLLLWRQSLSLKRNARNHLIQLFVSVIITSLVLTVSYVGASGTTQNGVQDIRGFLWLITSEVAFGVSYSALYAFEYEITLFKREVGMYKCS…
G	TnABCG5	MQIVIYKKGPTSHDVNAAMTSGLKMESKGTQIHLPLMGRGSRGELNDKVTFAQVKSPPYSEQLNNGQLLGGSQINLCNGGAGTTAMTGLPKIPNGYGDQKKPMATLTHLPKRPPVDIEFSDLSYSVSEGRKRGYKALLKCINGTFRSGELTAIMGPSGAGKSTLMNILAGYKTSNVSGSILINGKERNLRRFRKLSCYIMQDDCLLPHLTVREAMNVSANLKLGKDMTVTAKKIVIDEILEMLGLVEAGDTRTINLSGGQKKRLSIALELVNNPPVMFFDEPTSGLDSSSCFQCISLLKSLARGGRTIICTIHQPSARLFEMFDFLFTLAEGQCIYQGRVSGLVPFLSSMGLHCPSYHNPADYVMEVATGEHGDWVHKLVMAVNKGNCGRGQSSSSSST…
G	TnABCG6	MDNVYILNNLRKGSLKVTITPAQHKTLTHLPKRPPVDLAFTDLTYKVQEGRKSNVKTILKSVSGRLRSGELTAIMGPSGAGKSTLLNILTGYKTSGMEGSITVNGMERNLSSFRKLSCYIMQDNQLHGNLTVEEAMAVATALKLPSATTTADKEEVIQEILETLGLSEHHKTMTSNLSGGQKKRLSIALELVNNPPIMFFDEPTSGLDSSSCFQCISLLKTLARGGRTIICTIHQPSARLFEMFDHLYTLADGQCVYQGSTGRLVEWLGSLNLQCPSYHNPASFIIEVSCGEYGDNTGKLVRAINNGQNDIRNGVPFPDSKVPDYNNKQAMEESLSKEWNKNDLAQVQEKFKDNGTNNGNGNLQNGILQYAASEIAKGDPLVVQMDSEKQDNVEVALLG…
G	TnABCG7	MAKAIAMLQGLGQKVSGKEHQECRTLQVNMPPPCPVDVEFNNIKLTVSEGLTSRKTKTILKGVSGLFKSGQLTAIMGPSGAGKSSLMNALTGFSTRGVTGRIRAGDTICELSPKSSMRSLEAYRKKSCYILQDDRLNPLFTVAELMKFAADMKLGDTLTEKLKMSVINDILCTLGLAGSENTRCSHLSGGQKKRLSIAVELIDNPPVLFLDEPTTGLDSRTSAQCMGLLKSLAKNGRTIVCTIHQPPASIYSMFDQDTVPYLASVGLQCPMYNNPADYILEIATGEYGKFNELLAEKSSRHEWTEKTAPLPVIERRSEAIAFGKTSVIVNPPDELYKFGKLFKRCILQQYRDWTVSHLKLFMHMVIGVLLGLLYERAGNDGSKTLSNLSFLLVSVVYLC…
G	TnABCG8	MSTTLEVNSRALGHAHLSHLPQRPPINLTFQDLSYTVQNGKSSKIILRNINGDFRSGQLTAILGPSGAGKSTLLNILAGYRVTGASGVISSNGEPRDLRQFRKLSRYIMQEDLLQPYITVEESMLIAADLKLGIDMSKEKKAVIVEEIIQLLRLQKARNTTTERLSGGERKRISIALELLNNPPVIFLDEPTTGLDDVASSTCISLLKRVARGGRTVVCSLHTPSARLFAELDHVYVVAGGRCAYQGAAAAVVPFLKDLQLPCPKTYNPADFIIEVSSGEYGSHVDRMVSAVENGRNHRWRTYAIEEGQSSDFQEMEIEQLNTGGCVDQHNYKHGCSPCQQFVVLLKRMLLQTVRNKSYLWLRVGMHLFVGFIVGGLFNQMGYDASKTIFNFGFCYACT…
G	TnABCG9	MSNVPLVRKAIVGASLAHAAPSTHPNPTAGEAQESHWTPAALERAGSTLKALNRMAKRPPVHIFFEDLTYTVSSHKGERKILHNVSGEFRSGELTCILGPSGAGKSTLLNILAGYNSNGVNGRIMVNGHSRDMRIFKKLSTYIMQDDLLQPRLSVQEAMKIAANLKLGKELGNAEKELIVEEILQTLGLWNHRDTMTEKLSGGQLKRLSIALELVNNPPVIFLDEPTTGLDVVSIRQLVVLLRLLSRQGRNIICTVHQPSASLFSLFDRIYVLARGMCCYQGSPDMLVPYMAEAGHICPTTHNPADFVLETLLGNLESMAQLSELCLNGKLCKRPNRIMTRGGRTPVLHSDESVQRIFSEHVTKDQSYKVEFPTSFWTQFIILTSRMLVQNKRNTISHW…
G	TnABCG10	MNHCKGQRIHFSRPRKLVVKGVDGRFTSGQLVAIMGPSGAGKSSLLNALSGYRSAGVTGELLVNGQPRDEHHFQRSSCYITQEDLLQPLLTVREAMDVAAKLKVPKGLKAPSEEILQEMGLLEHQHTRTDMLSGGQKKRLSIALELVNNPPIFFLDEPTSGLDTVTTTQCVKVYVLADGLCIYQGDTGAMVPFLRSVGLPCPVHHNPADFIIELTENPEVITLLSKEMMNGKLYKSSKLDEAPPQAAPNQMQLKISYQTDDSQETEIILSNEKCTYKVTNYEGSSASVSSLSSQLSNGNSSMAWMKMQKSDSTGYATTYCLSIQFIHHVMCGVLVGICFFNMANDGTQMFNHLKLCVGLVIFFAYTQIMVPVLVYPQEVKLVKKEHFNCWYSLTPYYAA…
G	TnABCG11	MDVEAARDDISVEDGSLIVYTDIFCTVKRARKSWYKRDETFDSPNAILRGASGALRPGRMTFILGPSGAGKTTLLKILAGRKKTGVTGSLYGAGRSSVLVAQDTTLIDTLTAGETLRFAASLKLPNVSHRERNNAINTVTKQLGIHDVLNTRAGRLSGGERKRLTIACELLTDPTIMLLDEPTSGLDAVSSLSVARALHTVARSGRTIACVLHQPSSQLFNTADDVIVLANGRTLYAGAIVDVPESLTRAGFICPQYYNIADYLLEIASDEHSGNLNLLEHEASSYAHEMSKIAKNDVYNGKGKELSPESEALLNPNPTPCKGYAASVCQQLNALLWRCCIGVARDVYLTQIRLLAHFMVALLLGALYHGAGAEAGRMMSNTGCLFFFLLFLFFSNAMP…
G	TnABCG12	MNQLLARSKQILHGVHGRLRPRQLVAIMGPSGAGKSTLLDVLSGYRITGVGGAVFINGRGRIMKRFKRMSCYIQQDDRLQGLLTIEDILTNLGLYEHMNTRGAQLSGGQRKRLSIALELINNPLVMFLDEPTTGLDSSSCTQVVQLCRSLAHQGRTIVCTVHQPSASLFALFDHVYVLAAGRCMYQGTTKNLVPYLEQAGIPCPIYHNPADYIIELSCGEYGQDKINIMSNKSENGRALDWFDDFESIPSMEGLRKLVPLSVLRDTEPTGGDEETSQSNQLNVLIKRGFMKAKRDATMTHLRLIVNVVVGIMLGSLFINAGNEGSRVLENYNLLFAILMHHMMSPMMLTILTFPNEMSILSKEHFNRWYSLGSYYVSITLVDLPVSIVACAIFSVIVYT…
G	TnABCG13	MASEHSESQETNSTSLVEDSLNISFEDINYTVRHGILAGGRKTILHDVCGTFNAGELTVIMGQSGAGKSTLMDILAGYTKPTSGSICVNGRVRNEKMFRRRSCYILQDDQVQNMLTIQESLHIAADLKLGNHISGQQKKQRIEEIITSLGLNRARRTRAGNLSGGQKKRLAIGLELISDPPVMFLDEPTSPARADGGCDDAPAVCRPAIHGGPDICRGCGAMRVRRLRHTTPAISRANESDVPTVPQPLIEICVENASGLVESSDNGRNNNWCTNISHETDSSIIEKSNLSACEEVCLTTLPAPKEDPTSKILLALKSTYSTSFCKQFTTLTRRSLLSIWRDPAFTIMSTGIHCAMALFIGTLFYNIGSDAKYVRDNYNFLYFSLMFLMFTAFSSVSIN…
G	TnABCG14	MTPGAEELSIMGGNNNVVPLLPRATVELEFRNINCSVNTFVPNKLRIEQKQILKNVSGTFKPGELTAIMGPSGAGKTTLLNILAGYSTRGAKGEIYINGVCACASKSSGRGGARYIRQHDDLREHLTVYEAMSLAAALKLADFTAHERKEKVYEILALLGLSGTAQTLCRDLSGGQRRRLAVAFELLSDPSLMFLDEPTTGLDSSASASLIALLNSLARGGRTLIATIHQPSALLFEKIDAVYCLQAGNTLYMMEVASGEYEVDLVKSAQTMAQFKPAAIANGSWESHIPTIPALPSPMDISSDLKSKQTVAKMKQKQKFAKNIYRQSGLLRQTWILLYRNYLMTTRNYSLFMYRVAAHVVIALIFGYLYLGVGSEAGSVLGNYVYLYGSMLLVVYTGK…
G	TnABCG15	MSQSALGLGGERRYSVPSNPLMHDHRGMHSEDLHAWSIYRQNLNSDFTDSALGSTDKSPLPYGNFQLRDTTVQSILSHPRYGPKSALGSNMYTYLKFGLPRVFPPNHNGSQRSGTPKPKTSIGSGMKPAPRIQRQSRGMRETSSGYDSSDNETTTNYKYSRKYRSDPDFRMQNIHPSLQPNTGVPVVAMQQAGIRGDGQWTNVRNKSVSEANLLGIDARPQRAHYNNRRNSVADYVPDGDHHSYLMSPSHLGGRMSKAGSHMSIAQSRKHSTLRPGDHLDGYTHSAYIYPNYYVNSLEITAPENKSTLLVSGLSFEVKSGEILAVLATSHHEATGLLDVLAGVRKKLTGDIVLNGQPVASSTLRKVAAYVRKDTSLCPSMTVEHTLRFHAALRRPRNNG…
G	TnABCG16	MIGSDYTLELCNVFHSGQVEPGSFFQRLIGGVKTGIILKDVSFTTHSGEVTAILGSKGSGKRALLDVIARRVPAKGHILLEGVPLENEQFNSTCALVRHNTRLLPGLSVQQTLALSLTKISGYLKSSKVKQVMADLALSNVAHKCVTNLTKSEYRRLVIGVQLIRDPIILLLDEPTWDLDPLNTYLVISILSNAAKKYGTAIILTMEKPRSDVFPFLDRVVYLCLGDVVYAGPTRNLLDYFGSIGFPCPQLENPLMYYLCLSTVDRRSRERFIESNHQIAALVEKFKLEGQGIMQGNLHENNRIVNPNKIQLNYGKPGGMRVIWMLYLRLLASIFNLKKNGMKQMFMRLFALPMYFFILWIFYNEAKSGLIFNAMVGTYFISIMNTICLYSPYRTRYYQ…
H	TnABCH1	MPAYDNEGATISMEDVRAPEAPITISTIEKELIARRHKQFKSQKSTVASRYGLLGASGCGKTTLLSCIVGRRRLNSGEIWVLGGKPGSPGSGVPGPRIGYMPQEIALFGEFSIRETLIYFGWIANMPTKEVEERIDFLIALLQLPNPTRQVKNLSGGQQRRTSLAAALIHDPELLILDEPTVGVDPVLRQSIWDHLVEITKGGRTTVIITTHYIDETKQADIIGLMRGGRFLAEESPMELIRRYQGESLEEVFLKLSVLQNLGKRRRSSILADVVERVELPALPNPAAVDLEEAEIGEISGEFGDNVSMSSRGRVVVTPELVAPIEAMPPPEKPARNMDMYIPMKWHHMKALIWKNFLSLFRNFGALAFIVGLPVSQMIFFCLAIGHYPVGLPIAVVNY…
H	TnABCH2	MAEETRNSHLGAKRETSPPSPMGDAKESKMSQIQFSPPFEKQENSVWQKRQQAVCVRHAFKHYGSKKRPNHVLSNLNMTVAKGTIYGLLGASGCGSGVPGKRVGYMPQEIALYGEFTIRETMMYFGWIFGMETREIVERLRFLLDFLDLPSENRMVKNLSGGQQRRVSFAVALMHDPELLILDEPTVGVDPLLRQSIWTHLVRITSSGDKTVIITTHYIEEARQAHCIGLMRSGRLLAEESPQALLQMYSCISLEDVFLKLSRKQGSETQPTPQQSNQLTTAPHGSANGQANQVVELNVTGGALGLNKMSKREEAPYAAEDAQVVGLVFHQSKEVLIVDHGAGSNGDIPGKVTDVTPECEDCGSCLNFTSRGKIKALIQKNFLRMWRNIGVMLFIFVLP…
H	TnABCH3	MAVCSAAVIVEKACKYYGRPNKADFKPVLKEMDMVVDRGIIYGLLGPSGCGKTTLLSCIVGRRKLDSGNIWVLGGRPGEKGSGVPGPRVGYMPQDIALVGEFTVRDAIYYFGRIYGMKMEKMVERFEFLSNLLDLPSGNRLIKTLSGGQQRRVSLAAALVHEPELLILDEPTVGLDPVLRERIWDFLAEQARGGATVIITTHYIDETKQAHKLLAEDSPEDLLRKFDCDTLEEAFLKLAMRQHEMPRRRSTLTSSPDVIPDSNMCNGVDSRYHSRDDFPTITSSTDVLTKKEKRPKDSKRLAKSRYKAVFIKSIQHGLIFSILFPIIQVVAFFSAVGHDPRDLHIGVTPFNTSEEARQAVSSGQLYGALHFSRNFSAALGKRFTDGEVEDDVVNDSSVS…
