# Supplementary material for: The genome of the Hi5 germ cell line from Trichoplusia ni, an agricultural pest and novel model for small RNA biology
Source: eLife journal article supplement (doi:10.7554/elife.31628), 2018-01-29
Supplement: supp [file elife-31628-supp-v1.zip › elife_poa_e31628_Supplementary_File_7.xlsx]

## Sheet: A
Olfactory receptor genes in T. ni
Gene name	Protein sequence
TnOR1	FKPFHDSYKLITFALSIGMIYPNPKTEKWRLASIPLLVATIAPLAIFVFIDMYRCWMIKDIVNIIRHSTVMGPFLGGFFKMILMYHKRIQAKQILDEINRDHLMFNDFAEKYKNIARSWIRNSQIYSERGWVITVTGCVMTFPVMAIVLNVYNFAFKSEPEKYMIHDLEKPFSESEARFESPYFECMFMYMFYASILYVVNFIGYDGFFGLSINHACMKMDLYCTALEDAMRNDDEVCGRVVAVIKEQCRMFRYVDLIQDTFNIWLGIIFIATMIQICTCLYHITEGYGFDLRYMIFVTGAVIHIYLPCRYAAKLKALSLDTACRFYSCGWERVEDQRVRKMVSFMIARAQVPNEITAFNMMAFDMELFLSILQSSYSMFTLLRS
TnOR2	SSEDLYLDRAKFVMKHLGVWMPSDDESAIYKGYRIFMITLQYLFLIFQMIYIIQVWGDLDAVSQASYLLFTQACLCLKITVFQYNMDMFRQLLSIMDGEVFKPETATHEMILQVQAKRIKRLLLAFMISSQITCGLWALKPLFDDASREFPFDMWMPVNPEKAVQYYIGYGFQLGTICISAYMYFGVDSVTFSSVIFGCAQIEIVKEKILTITPVWDKRGRDITEALSENYKKLTNCIKHHQTIVTFTKLVENAYHSYLLFQLMGSIGIICMSALRILVVDWRSMQFFSILTYVSVMISQLFVCCWCGHELTATSEDLHRVMYKCIWYEQDVKFKRDLCFAMMRMNRPLVLRAGHYIQLSRQTFVAILRMSYSYFAVLNQT
TnOR3	MVIKNTELFLGRPKRILGFFGIWPHPPNYIIFRKLYMLFVMWTQYSFLLFEIIYIAEVWGNMNEVSEASYLLFTQASLCYKSTAFMVNKNNLIELLGYMDDDIFKPKSVVHEKILATQARKIRRLCLFFLTSATTTCTLWAMIPLFDDASKRSFPFRIWMPVTPLKSPGYEIGYIYQMVSIYISAFLFISVDSVAVCMIMFGCAQLEIIMNKIEKIQNVSLSSKSKGNNDGSIKNNNELLIECIKQHQTVERFIQLCEDTYHANIFFQLTGTVVIICNIGLRISIVEHDSVQFYSMLNYMVTMLSQLFLYCWCGHELTIRSENLRDWLYLCPWYEQDIKFARSLWIAMERMKKPIIFKAGHYISLSRPTFVAILRCSYSYFAVLNRVNTE
TnOR4	MYTYFKIAVFWINKEKVVNLLKYLHCNEFKPKEPEHREIITKSIKSARFVMTYYSTMCVGAVSVGIIMPLTENFDILPTNVEYPFLNVYKTPAYEAVYIHHIYYKPATCIIDGVMDTILAAFVASAIGQIEILAFNLRNFDKVAERQRIRDVAENKYIEEYPEQYYVRSVLKDCIVHHNCIIRYVSMIESAFSLASALQFMLSVMVLCLIGIQFLSIENPASHPMQIAWMGIYLTCMLIEVFILCWFGDELIWKSTELRKAAFEGPWMNSDRKTNMFIIIFLERCKTPLRLTAGKIFTLSLDTYTVLINWSYKAFAVMRNMKK
TnOR5	MGVFVKNATLSVSISLTVLKLTGFWAPETLGPKQRTLYKVFTAVSFMFVLGTYLIIQVVDLFRIWGDIALMTGTAFLLFTNMAQAAKIVNILGRKKRIQAIVKDGNDVLSGVQSREEREIVKSCNLEMIVLQALYFSVTFITTLGWATSAEKHQLPLRAWYPYDTTKSPAFELTYIHQVVALLIAAYLNVAKDTLVAALIAQCRCRLRLLGHALRSLEEGLEITEKPVLSQDQEHIVQSRLATCVTHHQQALAASRELQQCFSEPTFAQFIVSLIIICATAFQMSTMQSENIVRLMSMGTYLLNMIFQVFIYCYQGNQLSVESTEIAGAAYECPWYKCSVLLRRDLLIVMVRTRRVLRLSAGGFTTLSLASFMAIVKASYSLFTLLQQVDEK
TnOR6	YEQSKTTDFFYKIYFIVYIFGLPNYWIEDLKLPTRFVRVYDRFTMFNNALIFTLICTELLAPFTQHNLSQKQQSNFLIYCISHPMLYGFRVIMATHQKKVKTLLYSLTVVLKRVHNDPEVEKQMIHSAVMYLFALCFSCALSMFMYTFDASWEMVRHNATFTTLVTAYPDVEDRSELASTVRILTYIVWWIFFSRIIGVYILVIPLATCLSYQFKNLQSYFLSLADIFEREDLSQSLKEEQYEERFKIGIRMHLETLRCTKLTQTVCNGVYSGQIIFNILILVALMSQMANSERTLVNICSTVFTATAVLVSTGFYMWNAGDVTVEANNLPTAMFTSGWENCYHGSSIRVRKLVVIAIMQAQQPVVLTGLRVIPLSYQSYVSIIKSSYSVFSVMY
TnOR7	EPLLIVKTIHRIEFLFRCVGINIKSSEKTRSDYIRNRSVYIFNFIWLNIDLAGAVVWFLAGIANSKSFTELTYVSPCITLSFLGNFKSLYLIFRENNVDKLIEVLKNLEIKERSRENDEEKDKIIKTEHNFVSTVISVLNVFYFVLVVAFALSPVSLVALKYFTTNEVELLLPFLILYPFDAYDLKYWPWVYLRQIWSEVIVVVGICATDYMFYIFCTYIRMQFRLLRHNIEKMIPSDGNNHVRDNKELREHFVGMIKWHQDLISSTNILESVYTRSTLLNFVSSSVLICLTGFNVLAISDVAIVVTFLSFLFMSLLQIFFLCFFGDLLIASSMEVGDAVYNCRWYLADTSLGKDLLLVQTRAQTPCKLTASNFSEVNLKAFMKILSTAWSYFALLQTLY
TnOR8	QFESCIQRIDTFLKLIGLSIYGNDSNKTMAQRLRKYWVCMIHMVSFNYSVLGEFIWLGRGFVYGTTLWEITYLLPCLTLCLLGNFKTYYFILYKHHANDLIEALRKLQSSDAKYEEDLVGEMQKWVVFLFNISKLLLILTIIGVVAFALGPFVITASHYYTAGEIKFFLPFNVWYPFDAFEIRTWPVVYLHQLWSAWVTVFSVYGPDCFYYTCCTFIQIQFLALQKDLEQIIKTDSWDDHSTLAAFKEEFVKLVHRHRELIRCVNLLEIIYSKSTLFNVITSSLIICATGFNLMSLIFQSIGVGDAVYNSQWYKTGAAQRKYLLIVLVRSQKPCKLTAYGFTDINLKAFTRIHNVMIMASFSAFLIFGLMQIFLYCYYGDSIMRSSMEVSDAIYNSLWY…
TnOR9	MDIPAYEEFLKQIKINLWVSGIPYGDPKVHFRFYILYITLQIMFGLELTYFVSKISSENALELSQLAPCMCVGGLTVLKITALTLKRKTIYKLTECLSQLHGKILKDDHKTNLVKKNLILLNVFIKYFLVLNAVLISVYNFSTLIIMTYHYFANNEVIFPLPYPVFVPFATDSWLPWIVVYVFSIMSGFICVLFYTIVDGLYFVLTSHICGNFSIISDRIKCLDVSSMDNLTEIIKDHQYILKLAEDLEDIFTAPNLFNVLFGSLEICALGFNITIGSWGQTPACLLFLSSVLLQILMMSVFGENIIRESSKIGDAAFLCNWYNMDEKTKKLILMIIVRSKKPARLTAYKFSVISYESFTKIISTSWSYFTILRTMYAPADVNRSD
TnOR10	MKKTKDLAPIAIPHGPPVESTSEYFKSLMESDRMVKKYPVWDVARPTPQVLMEKARRDLMDADEKLAVKRADEKRNRAIMDAKWEDLRTKEILLKESFISFNKFIRENQEKRDRAERKMQADNEVLERKARDTEAMRQRVIEMEEVKKLMEQQVQDYTIYEDYLMSVVHNYPEFKQPLDVLNRYEALAAAKSTLAERQERDLEMLENARQEIASLTEEKKLFIMGLNNTLANLRWRYDKIRNRVIKWELALNRLKETAARRHVELCHVRSAIWSLYVKICKQKGLSIDVDTNDFEQQLVVIMRALLELRRIYRIAQKRSKENTITNNLETLWTKEPIQGWIYMDITRSPFYEIVFLHSCLAQLYVGLAMGQFGVFFASNSILICGQLDLLCCSLRNARY…
TnOR11	FRGIRNPEDYFYIKTLALAMKIKSSWPTRELGHYESETLLSVMKFLHVFLSIVSLFGGFMYIKLHFSSLPFFELGHLYICMLMNLVFFSRILTLCLNQKYRDVARDFLTKFHLFFYKDLSEYAMKTHIRMHLISHRYTLCLTGQMIIGILLFNFVPMYNNYAAGNYDSNNKNISYEHSIYYSYPFDVTTNWKGYIVANLVNWVVSYFCSSWFCMCDLFLSLMVFHTYGHFKILLNKLNTFPRPANKTNMFVGSADMNYEMFDEHESEKVFDLLSDCINYHRHIVNFIDRLSNVFGPMLLVYYIFHQTTGCLLLLECSQMTAAALIRYLPLTIIIFQQLIQLSVIFEIIGSESDKLSDAVYGLPWECMDDRNRKMVGFLLMNVQEPVHVVALGVANVGVT…
TnOR12	VHVQVHKLSHIFSIYLTGMLWLTVMLFNLIPMYNNYSAGNFKTLGPLVNTTYEHAVYCLYPFDFETTFNGYIGGLLSGWYGSILCGSSVCMFDLFLCLMIFNLYGHFKILIHNLDNFPRPATAVSNEYSDSELEIVTVKLKECIQYHMVIVDFTDRMSDAFGMALFVYYMFHQVSGCLLLLECSDVSAAALTRYLPLTIILFGELILLSIIFETIGSMSEKLKDAVYNMPWEYMDTKNRRTVLIFLIRVQEPIHVKAGGLVNVGVTTMASILKTSFSYFAFLRTF
TnOR13	MIMLTLISLAFFMWNGGDITIEALKVSDAMYFSGWENCSGQSSARVRKLVACAIRQAQSLYEQSKTTDFFYKIYLTVYICGFPNCWIEDLKITKRFARVYDRFTLFNNALICTLIGTELLAVFTQHNLSEKQQSNYMIYFMSHPLMYGFRVIMGTHQKKVKTLLYSLTVVLKRVHNDPEVEKQMIHSAVMYLFALCFSCAMCMTMYTVDAGWEMISHNATFTTLVTVYPDVEDRSELASFVRILTNIVWWIFYTRIIGVYILVIPLATCLSYQFKNLQSYFISLADIFERDDLSQTLMEEQYEEGFKTGIKMHLETLRCTKLTQTICNEVYSGQILFNMFMLVALMAQMTNSDRTLVNMCSAGVTGSAVLISTGFYMWNAGDVTVEVSSYHPSAFNSIL…
TnOR14	KNYNILKTLCKRVFLIGSGNFWYKENEIGDDRRLVYRAYTALLFFIYGFMTVLELMAAVIGDFPEEEKRDSVSLAVSHTIVMIKIFSVIANKSLIKTLNHKMVTVCESYEDSALMAEKYKIIKINVVAFIAMVYGSVACFVFEGLRKVFTGAHFVTVVTYYPVFEDDSALATAIRIGTTLILCIMMVTMIITVDAFTMITLIMYKYKFITLKQYFENLREDFFKLLDAGHTEMATERLANGLVEGIEMHKTLLKLSTDIDKAFGTVMALQVCQSSGSAVSLLLQIALSDLTFVASMKIVFFVIALFFLLALFLCNAGEITYQASQVSEAIFYCGWQSCPPRTKSAPRRNIRQLVVLAILQSQRPLVMKAFKMLELTYGTFILVVRGTYSVFALFYAQN
TnOR15	VKKPAEYRYLTMLRGLLDTINAWPVQKEGSRYIGLLNYMLLLFFIVCWINIFLLVKVNFDKLSFYELGHTYIVLFMTIVNIVRIDKTIQFDIKFISYVTSVILCMLDLLLSLMIFHLWGHFKILIHDLESFPLPAKTETVTFEGNNVLTAAMYSDEEQEQVSKKLKECIDYHRLITNYTDRMSEAFGPMLFISYLFHQVAGCLLLLECSQMTPEALIRYAPLSLILYQQLIQLSVIFELIGSTSEKLRDAVYSVPWQCMNTSNRKTVCIFLVNVQEPIHVKALGMMDVGVTSMAAILKTSLSYFAFLRSM
TnOR16	MPNKTKDLLRNACRYVYYAGASNCWYEDIYKESKYYRLYSVITFSIYTIMIFLENLAALFGKFPEVEKNSAVMFAAIHNIVLTKMFLLLYHKNSIRKLNYEMATIGEDFEEDYVMKKQYRKAKVGISLYVISVYLSLTAYGVESARRSIVEGAPFYTVVTYLPFYDDNSVAALIFRIFFYITWLYMMLPMMSADCMPITHLIALTYKFITLCHHFERIRKEFDSNVLVMNKRMAIDKLKAGCLQGIRMHQKLLYLADEIHRVFGIIMSLQVCESSAVAVLLLLRLALSPHLDLTNAFMTYTFVGSLFLLLALNLWNAGEVTYQASLLSSAMFYSGWHLCEMEKPSRGDIRWLTLIGCAQAKKPLILKAFGIQDLSYETFVSVARMTYSIFAVFYQRGE
TnOR17	MELHQVDCFKMNMRFWKFLAIWPDNDSSRSYKYFSILFIGIVVILYNVLFSISFYFLPRQLDLFIEELIFYFTELSMFSKVMTFVFMRKKIKEVLRILETDIFQPDDAEGLALVTKAKNFIMMYYKIDFIISGTSNFAHVVAPVLGHVIFKAELLLPVTRYSFFSDALTQKFIYILYAYQAVGIHFHMLYNINIDTFFVGLMILIIAQLDVLDGKLRRVADVEQDTENEGLCSLVEEIFSTTLFCQFSMASCIICVCLFRFTMPAPVRYYIFLATYMSAMMLQILIPCFFGTRLMDKSNLLVFSTYSCDWTPRSRQFKSNLRLFVERANKPLSLTGGKMFCLSLNSYTSIMNSAYSFFTLLQHMQTRE
TnOR18	FLIYFHRYASYLCAHAVCMADLLLFLMIFHIYGHFKILLNLMATFPRPAATVSRTNNTKQENLMFSESELKDVCVRIKECIDYHNYLLEFTKSMSDAFGPMLLVYFSFHQVSCCLLLLECAQMSAEALIRYGPLTVIIFQALIQLCIIFELIGTVSGKLKDAIYELPWECMDSKNRKLILFFMLNVQNPIHVKAMGFTAVGVQTMATILKTSVTYFAFLRTV
TnOR19	FFTFNLKYLFFVGLWPEKYLTKYQKFLYKIYEIFLHFLTVVFLVITGIGTYQHKDDITIVLCNIDKSLVIYNFFFKTIIFCIKRDQLRDLIDEIERSGDGVTEEKKKLMAKYVVFLTLISAAVICAFSLVALFEGKMSIETWMPFDPTVNMMSLITSLQILAIIIFPALCRAFAMQGLVCSMLMYLCDQLIHLQSDLRGLKYSKESDTSTRMKFRKIIKKHIRLMGYSKSMEMIFNQYFLIQNLAVTVELCLNAVMVTVVGVEQMSLLITFVVYLAIALINAYIYCYLGNELIIQSQGIALAAYESTWTSWPADLQKNLLIMINASQRPLKLSAGGMALLSIQTFSQALYNGYSIFAVLNDVVN
TnOR20	KILQKFENPKRPLLGPNVKALRFWGLLLPKNVFKKYFYISMHILVTVFTATEYIDVWFVKSDMNLLLNNLKITMLATVSVVKVSTFLFWQKYWKSIIDYVTKADLYQRRTTDPKKLGLINDFTKYCRKITYLYWSLMYTTVIIVMVQPIFKFVASETYRENVRNGTDTYLQVVSSWVPFNKNTMIGYLAASVYQSYAAIYGGGWITSFDTHAMVIMVFFRAELELLRIDCSEIFGNEANDIEHEVVMSRLKDCHRRHVELVKYSRLFDSCLSPIMLLYMFVCSVMLCVTAYQITIETNPMQRFLTTEYLVFGVAQLFIYCWHSNDVLFASGDLSQGPYESIWWSKDVKYRKDLFLLVAQFKKIVVFSAGPFTKLTVATFISILKGAYSYYTLLSQSQM
TnOR21	MKALFKNLENPDRPFLGPNYWILQMMGLLLPKNKFAKILYIIIHEIVSFFVLTQYMELYVIRSDLDLVLTNLKISMLSVVCIVKSNTFVLWQTKWREVLDYVTAADKFERETKDPMRRNVINSYTKYCRRLTYFYWALVFTTFWTTTLTPLMRYLSSSNFRENLRNGTENFPHIFSSWMPIDKYHSPGCWITVVWHTVLCAYGAGIMAAYDTCIVVTMVFFGGKLDLLRDRCKEMFGEYGSSINNKEFEDSVRQLHKIHVMLIKYSRLFNSLLSPVMFFYMVMCSLMLCASAYQLTSAQNAAQKLLMAEYLIFGIAQLFVFCWHSNDVLVKSENMALGPYESVWFTSRSRQQADVLLLSGQLRITNIFTAGPFANLTLPTFINILKGAYSYYTLLRK
TnOR22	TKDMNFEEVFVLSTMALRLNRSHYSIARDTKWMIQFFLILSSSFTSLIFLLYSILFNDIKTGKIADASKNLAMVIISLTVTMKYVVLLYHQGSISELISTINVDYDLAKDFPEEEKLIVLKYAKKGVTVSKFWIVFAFGTSAIFPTKAFGLMSYNYWKGEFALVPMFDVTYPGQIEPHKNELWVFLMLFVLCLIFGAYAATMYVGFDPLVPIFMLHTCGQLELLSQRISKAFVEDVNETRQNLIIIILKLQILYNLMRRVKNYFHIFYEYNMKATTFILPLIMFQILEDFRHSRLNVEFLSFFAGCTLHFYMPCYYSDVLMEKCDKFRQALYSSGWEKQPDKQVRQIVLFMLTRAKIPMGISTVFYSINLNTFAEMCRQSYGILSLINAA
TnOR23	AIPILYYILAVSISVGYFYVYLISMVWFVFYRCAETGDLLAAIIIFSLGSSSEIGTVKLSFMFVYIKKVRWIVSECLACDASVIPGSRFSENLMVTLRHVKKRAIIFWMVIIGNGVVYVMKPLVTPGRHFTEDLFILYGLEPMLKTPNYEIAFMLFVAGVTFCCYLPANITAFLIVVSGYVEAQMLALTEELLHLWEDAEKHYDDAISNSITDRNEDKNAVKTKIINDYLENRLKEIVARHSIVINLLRQVESVFRGAIAMGFVLLILGLIAELLGKLENTYLQMPFAFMQVAMDCFSGQRLMDASIVFEAAVYDCKWEKFDKANMKMVLVILQSSQKTMTLSAGGISMLSFSCLMSVTRGIYSAYTTLRSAL
TnOR24	VFSSINSTGFILVAQTSTMFQIWGDLALMTNAAFLLFTNLAFALKIINVLVRRRDIKSIIDESNIELSTEYRQKGIQIVERYPYDTSKSPAYEITYANQSTALSVAATTNICLDTLVTSLIAVCRCRLRLVALSLRTLCDDIQIPDKQLMTPEYEQIVYKRLQLCVMKHEAALRTARQIQRCFTYPILAQFTVSVVIICVTAYQLAIELNNGKWVRIISMVAYLLCMMLQVFLYCYQGNQLTEE
TnOR25	MDCTIVSFYSQAKVQLRMLRYNMEHLVEFGETGKNNAPFNERFYKFTYEDDEKEKVEIQERLKKCVIHYHQITRFAKEIESIFTEAMVIQFFVMAWVICMTTYKIVGLSIYSAEFVSIAIYLCCMLAQLFIYCYFGTQLKSESDFVNQSIYYCDWLSLSPCFRRQLLIMMQCCFQPIAPRTAYVIPMSLETYIAVLKSSYTLFTFLNR
TnOR26	RPSRYFVLHFRLLRFLGLGWWHQPDEENTENFPSWYLYYSIATQVIWVAGFVGLETIDPFVGKKDLDRFMFSLSFVITHNLTLIKLCIFFFRNAQIQAIVRTLEIEMYDYYQNEDKNRKTVRFSKIMTGSFLFFGWMTIGNTNVYGTIQDIKWKAIVANLNDTSERPFRTLPQPIYIPWNYQKDSSFIPTFVLETVGLLWTGHIVMTIDTFIASVILHMSSQFEILHEAITTAYDRTMGTLRQGLHHDAVNVPGGESSAIDIDDNSEKIVQSFFSKEEIETALQNTFRVCFKQHQVLINCVELFSRTYSYGFMTQLLSSMAAICVVMVQVSQDASSFKSVKLVTSLAFFVAMIIQLAIQCFTGNELTLQAERISDAVMQCKWERIPPRQRRLLLMMMMR…
TnOR27	LFRFIFPLVDEVEYNLIVGIRLPFYYKTPELYPLAYIIVVIAFMYISHFVMVTDLIMQTHLMHLLCQFSVLSDCFENLVTDCRPGFEGKSCHQWDYLQRYTMKMRSTLSGPMLGQLAASFTLICFVGYQATTTIAESIAKCLMSFLFLGYNVFELYIICRWCEEITNESQKVGEAIYCSGWECGLAKLPGVKSTIVYVMARANKPLYFTAGGMYNLTLTSYTTLVKTSYSALTVLLRFLPGKRST
TnOR28	MAKVKAQGLVSDLMPNIRLMQAAGHFLFNYHSGTMLLRKVYASVHAVLIVIHFACMGVNMAQYSEEVNELTANTITVLFFAHTIIKLVFFALNSKSFYRTLAVWNQSNSHPLFTESDARYHQIALTKMRRLLYFICGMTALSVVSWVTLTFFGESVRLITSKETNETLTEPAPRLPLKAWYPFNAMGGSMYIVAFVFQVYWLIFSMAIANLMDVMFCSWLIFACEQLQHLKAIMKPLMELSASLDTYRPNTAELFRASSTGN
TnOR29	MLARSAIKYWVERHKHVVRLVASIGDTYGTALLFHMLVSTITLTLLAYQATKINGINVYAFSTIGYLSYTLGQVFHFCIFGNRLIEESSSVMEAAYSCQWYDGSEEAKTFVQIVCQQCQKAMSISGAKFFTVSLDLFASVLGAVVTYFMVLVQLK
TnOR30	MREKLVDILEFVNRDEFKGDYGDKNGLLYKYTNRIYKLWRKAYVVFSNMSFVFLMFTPIRNYISRADTDLPVCKYYFLSDQAREKYYTFWFIYQPFGLYGHMMYNVNFDLMTGGLFIFVIVQLQLLYNNLSNLKVSEEEILLPEELQDKIQVAKLHQCLRHYALIIEYCKLIEQAFNETIFVQFSLGSCKICVCLFRFLIFLSLYMVVMILQIMVPCWYGSQIIEKSRQLSFSVYSCDWTARSRKFKSNLRLLVERAKKPLTITGGKMFLLSLGTF
TnOR31	MVQTARGGKFQDAVEIFRMMPCVGYLLLAMAKSYKIVYHRSVYENLVDELRSMWPRGEVSDEEHLIVNTALTQLNYVVQGYYWCNNALLVIFLSPPFVEIIKIMSGEEVPLILPFFYWFPFDEFKRGYYEVILIAQTWHGLITIWFMLCGDLLFCIFLSHITTQFDLLAVRIRRLVYVPLDKQLIDTYPLEYSTAYVRKNKESIDTFSEQEWEQKHQSELANIIVRHRALVRLSGDVEDMFSFALLVNFFNSSIIICFCGFCCTKVCISLIDLLLTQSEGVSDAIYDSGWYKSTQKIKSSLLIMLHRAQKNVHVTTYGFSIISLASYTTIIKTSWSYFTLLLNIYK
TnOR32	MRPITSTTLNVKFLWPCICIQLSIISMTFEEIFIWHGVTEKDYSFATECFCYWVILGGIPMVYVSVLVNMQKIYDIVEEMNKDFIFVCSLSPRYRKPFLEGQLLIWQLCYAWFCFVCFVSSLYVLFPVAGLCYQSLFATQDENTQRPLQFPMWLPNDDPYRTPNYEMFLVIESMMCFCFVQTFCVYIYTLFHILLHYDTIMNMIILDFEVIFEGLDESVALLPRYDVRKMEVQRILNERMKKIVTWHLSVFKAVKTVSSVYGPMLVYQVSLSSIAICLIAYQIAEASILKLDSGKLDILFCLLGIAACLQLWIPCYLGTMLRNKAFALGDACWTCGWHETRLGLMVRTDIVIFILRAQQPVTIKFTGLPHVQLETFSSLMSSSYSYFNMLRQYSK
TnOR33	MQISPVHEKSILQLMWNIFYWFEFMNLFVVTWLELIKMVQTARGGKFQDAVEIFRMMPCVGYLLLDDNWLILPAMAKSYKIVYHRSVYENLVDELRSMWPRGEVSDEEHLIVNTALTQLNYVVQGYYWCNNALLVIFLSPPFVEIIKIMSGEEVPLILPFFYWFPFDEFKRGYYEVILIAQTWHGLITIWFMLCGDLLFCIFLSHITTQFDLLAVRIRRLVYVPLDKQLIDTYPLGEYSTAYVRKNKESIDTFSEQEWEQKHQSELANIIVRHRALVRHTT
TnOR34	MHFFFRMLDSESLASAVYLSNWYSASPRFRRILLIAMLCWSRPLSLTVSGVVPISLDTFVSYVKSAYTLYAVFQSESVASAVYLSNWYSASPRFRRILLIAMLCWSRPLSLTVSGVVPISLDTFVSVRIHYPNKRHFFLELI
TnOR35	FTKTLEDPKNPLLGPTLKGLYLFGLWPTGNRLRVMFFNSIHIFTVFFIFSEILDLYMVRNDTNKVLNNMSVSVLSVICFAKSYSCNIRHKLWKKLTESISEEEKLQINKQDPVIMKYIHGYTKYTRIITYGFWVLVFVTNLLLILTPFIKYATSQSYREEIEMGIEPLPQILCSWFPFDNTRMPGYIVCLFVHITMGTEGSGVLAAYDMTAVAIMSYLKGHLMILRDKCENLFTEISSPQEVLERIKECHRHHTQYSLFDALLSPTMFMYVLLCSITICGSVVQFTSKEVTTSQKLWVIQYTTGLVSQLFLYCWHSNEV
TnOR36	MGLLKLHSLCKYHKGWHFLLNQISSLENQQLQAKPSPLEYQSNNDENINFSDYINVYTNKFKTASTILIKIYFFTATLFILSPFIEQILCKLIESMECVTYPHILPCWSPLDDITFIGYLITVVSECLAAAYCVSVHLAFDLMSFGVMIFVCGQFSLLREYSSLIGGKGKKCNLSKKRDDRAHFRIKQCHHTNFILVKSITELDKLLVNIIGVYFFVATLTLCSVAVRLQTEVMGPMQLVSLIQYMCATLTQLFVFCRFGDAVMNE
TnOR37	MCLFIFQFRSYDLCLSQKYRKAAAYFIQEIHLFYFKETSEFAKKIHERLHIVSHIFSAYLLSITFFAVVLCNVIPMYCNYAAGYFETSGPLVNGSFQHSVYCLYPFDFEKTLDGYIAGAIIGGYASSLCGCCVCAFDLLLCLMIFNLWGHFKILIHNLDSFPRPAANFVFSFTNRMSDAFGFSLGFYYFFHQVAGCLLLLQCSDVSLGSLTRYIPVTTIIFGELILISVIFESIGSM
TnOR38	YKGFNETFKLCAFSLAFAFLYPNRTTALKRCITITLIVTFCGGQLFWFITYTFKCLYTLDIYNFARNMTLAVVLVLFFIKTYYVIYATSKFAPLLDKISEDLLVANDLEEEYQKLYDEHIKIAKVGEISWLLIPTIMSALFPIYAGCLMSIESIQTDDYERRMVHDMELLFVEDIQSETPFFQCMFAYNCVQCVVLVPNYCGFDGSFCIATTHLRLKLKLMVLKMDNAFKHSKSRQELRTRMYEAIKDHQDALDFYVQLQNVYGPWLFAVFLLTSFMISFNLYQIYLLQRIDPKYTSFGVVGVLHIYLPCHYASNLTAISEEIPDDLYLVKWESWADPVATKLLIFMIARAQKQLIVTGMGLVVFNMELFKSILQTSYSFFTLI
TnOR39	YQQNETAKLFMYLGTFFYLCGLPNYWETHVAHNKKFTKVYDKFIIVCNILLVLFGISSVTALFTQTNLTEKQEYDRGLVAYLVPFQSFFNVQLEYYKVEIKQILYHLAVVLREPYNNRELEATAVRKVRVYSTLFFIISLMFVSAGGISAIHKVVTAGEIFCPVIPAWPSLSDTSLLSLVIRIIFYIFWLMYDVRVMAMFTLLLSMLVMIFYQFKNLQCYFYSLDKIFLEENLSQREKELKYENAFKLGIYMHAETL
TnOR40	MGLHFLYWLPYDPYRPGYYEFTLVLQTWHAAISADLVRCEGEGIGSYSHQHWDLRHKKELTDIVLRHHALIRLASDVEKMFSLALLINFMNSSIIICFCGFCCVLIEKWNEIAYKSFLVTALSQTWLLCWYGQKLIDTSRNLAQALYNCGWYNGSKRVKSAILIMLHRSQKEIHVTTYGFSAISLASYSTIIKTAWSYFTLLLNFFKDKNDSL
TnOR41	MSHFDLQFEKMFVISTTALRINRAHYSIARNLKWIKQCFLFFLSTFTLFFFLLNAILFHDIRSGNVAEASKNLSMVLVAITITLKYVVLLYHQNSMKHIVATVNKDYDLAKDFPEEEKQIVLKYAKKGVTVSKFWLVFGFGTSAVFPAKAFALMAYYYWKGEFVLVPLFDFRYPDQIEVYKSETWMFLMQFGLCFVFGSYAATMYVGFDPLVPIFMLHTCGQLELLCGRISKAFVDDVNKTKKNLKVIVLKLQVLYDIVGRVNFYIFYEYSMKGTSFIIPLSAFLILESTLTIIVFKPIPLFQDFRNSRFNIEFFLFFISCLLHFYTPCYYSDLLMDTQCETFRQSIYSCGWEKHPDKQARQIVLFMLTRTRAPMGITTVFFSINLDTFAEVMCRQSYG…
TnOR42	LRMWEQVRKFGLGYCDLPTMLWNVSVFLRLFTLNIDSKHKKVYLSSTLLSCTFSMSTGIPTLVYVAIAFASFCYFYIYLFSMLWFVFVRSSGSGQTVATMMALSIGVPTEIGILKLFVFMQMAMDCFIGQKMKDAAVVFYRSVYACGWENFEKSNMKMVLVMLQNSQRITVLSAGGIMNVNYKCLMATMRGSYVKMWEKVRKFGLGYCDLPTMMWNVSVFLRLFTVNIDSKYEYRYLFT
TnOR43	MWEELRKFGLEYCDLPTMIGNIGVLLRPLTVNIDSTYKKEIKCVPKPFLTKKSLSQFLFSGIPLIFYIVTGVSYIFYLYIYLICMLWFVFVRSPVTGQKDSAMIAASLGICSEIGTIKLLFMLLVGLDCYIGQRMKDAGVVFEQAVYDCQWENFNSRNMKMVLIILQNAQKIAVVSALDFVEMDYVCLMATMKATYSTYTTFRSSIEMWEQVRKFGLGYCDLPTMLWNVSVFLRLFTLNIDSKH
TnOR44	IFLSAGLEPMLESPNYELSFVACVAGVIFCCYLPANITAFLIVVIGYIEAQMLGLAQELILLWEELNDTKNKIMNDYVEKHLKIIITTHGRNINLLRQIETVFRGAIVLEFFLLTVGLISELLGGLENTYLEVPFALICVGMDCFIGQRVIDAGVIFENAVYDCKWEHYNVTNMKIVLMMLQSSQKKMQLSAGGIIVLDFCCLMQIFNSVYS
TnOR45	MSFKAKIDNIIEKISHVEDPIESTKYMVTYIQRLVGIHNVFGDKKQKTVFSVLLMLVFASTFIYVGTLSQLVYLAQVFPDKIETFKALNCISATSVPLSKFFFMLTSRTRLKTIFELSHYGLSAIPEGSAAKKKMLSTLQKARYASWFVVANQAITHVTYLLMPLVFTLFGNDRYLPTTPGETYGLSPKYETPFFEITFVLTIVATAFSAINQTGYIVLFITLVTHELGHFYAITQTLDDIHDILSKKERPRDDPDGETSDESIDELLIFCVKHHQFLMHYHNKIRELYKVIFGAHFLSMTIVLVTTLQTMNVWDFRNTILTGVTGIMPLFLYCFGGELLISAGLEMSAAVYSCGWELMEPKQAKVVLMLLCLSQRPLCLTAANVFVMNRETFGNVAQV…
TnOR46	MEPLSESPNGEICLVTLAMQEFTFLFIVLNYQSVQLILIEHASIMFRLLALEMNTLNEPADVEVSKKLAKEILPSIIKRHALLLDVINTLKLLYSVTMGFNFGSNAVCILLFFYIPLQEWLQFMPVLVYCFFVFFLYCFLCQRLVDSSEIFETAVYCCGWEKFDLREKKMVFVMLRQSQKPVILKAADIVPVNIATFASTLQAMFKFVTVVK
TnOR47	MCVYLPFDLLIVTMTSNVSALLRLLQIDLKNAIKLRDSNMLLKNNIHKSDSDGYQEVKTIIETHQKLLRIADQLSNIFGIVIFIHAMFAALEICFFGFLTLRLQSSEVADAAYQSYWYESDVKVKKLILFIIIRAQRPSYLSALGFSELTLRSFSKV
TnOR48	MNLVLTELLASLRLLDLRLRRDLLTKLSDELMSEEFQTEHKPQRKILEKAIVLSRRLFIVLLSLSGMDILDFVQAHDADYIRGAPNIALGRNVLCNQLDVLIYNFENMKEFVKATAAERNCGENEAFKEIFKRYVLHHRAILRFVSSIQAAFSGQLSSTLFISAGIVGTTGVQSLHVATVVYSCPWIELPTHLKKNLVLFIAKTQVPLVITASKLVPVSLETFTKIALRTNDKRSNN
TnOR49	FQSEKLETAIYFADWVYADESTKKMLFIFLMRAQKPFAFTAKGYLNMNLDTFSGLLNTILRFF
TnOR50	MGRKITEEIRKFGLEYCDLPTMLSNVSDMLRILTLNIDGRNNKPIPTFFYVLTISVSITYFYVYVFSGIWFTFVRCRETGDLVAAAIVFSLNSTSEVAIIKLFYMRIYEKKLKNLTNRYLACDALVVKGSRFAQNMTKALRSVKKRAIIYWLVLMVDAVLYVAQPIVTPGQHLTVDAYVIFGLEPMFQSPNYEIAAVVMAIDVIFICYTVANVSGFLIVIIGYTEAQMLSLSDEMLHLWSDAQNHYQKTMKEWSNFESVYFENKIFSDYKEEDILNQYIKENLVDIIGRHAVNVNLLEEIEYAMRGPNAVGFLFLITGLIAELLGGLNNTMLQIPFTLIQVGVDCYIGQKVMDANIRFEQAVYDCKWENFNESNKKIVLVMLQNSQKTMTLSAGGMATL…
TnOR51	MIWFVFCRCPETGDLLAALIVFSLGIASEISAVKFLKDVRQIVSDCLLCDSKVVPGSRFSGNLLKTLRDVKKRAMLFWMVIIGNGLMYIAKPILLPGRHFMDDVLAQMTALAEELKHVWDDAEEKYFQNKEAVDISETDDSKDKIINMYVKENLKKIGKSHAVNLDLLGQIEGTFNGAIAIEFCLLITALIAELLGGLENTYMEVPFALMQVGMDCLTGQRVIDASVMFEQAVYDCKWERFDKKNMKSVMIMLLNSQQSMSVTAGGVTTLNYVSFMAIIKSIYSTYTTLRSTMD
TnOR52	MFCPVIPVWPDVADTSAIAVWTRAIHYIVWWMYDTWVMGILILLVTMFMVIFYQFKNVQSYFYGLEEIFHDESLTHQEKEKKYEEAFKLGIHIHAVTLVLVNLALFMLYGGDITVEALKVSDAMYFSGWENCSGQSSARVRKLVACAIRQAQ
TnOR53	MDVPVYEEFVKRIKFNLWVAGIPYGDPKVYFRFYISYVTLQIMIGLELTYFVSKISSENALELSQLAPCICVGVLTVLKITAITWKRKTIYKLTECLSQLHGKILKDDQKKNLVKKNLILLNVFIKYFLVLNAVLISVYNFSTLIIMTWFTCVLFYTIVDGLYFVLTSHICGNFSIISDRIKCLDVSSMDNLKEIIKDHQYILRLAEDLEDIFTAPNLFNVLFGSLEICALGFNITIGSWGQTPACLLFLSSVLLQILMMSVFGENIIRESSNIGDSAFLCNWYNMDEKTKKLILMIIVRSKKPARLTAYKFSVISYESFTKILSTSWSYLTILRTMYAPAE
TnOR54	MGDIWYEEIPVSYYAKKFYTFWRIISNSFVVVVLVDEFLSYLRSDLSDREKNDLVQFSLAHPTIALKIVTLYASKERVTSIMKHLLEETRPIFHSLELEKMSFFSDIPIRTEVVYYPNPSQTGLAINIMRFLVEFHWYYIVGIMATIDCLALCSLLTVAHKFSLLRLYFKNLRIKALENRRKPNFEEEFRKDFVIGIKLHADALWCARNVQKIMGPLYSIQVYEGVTLLVMCLIKLVLTERNYVFLLATLAYMFSIIILTGAYMIPAGDITYE

## Sheet: B
Gustatory receptor genes in T. ni
Gene name	Protein sequence
TnGR1	MAAERRCGVIGIRLLKRCLKNKDYYGAVASPNFITFLAIAFTELIANGRGPYCPTVRELGNKGIMNKENHGFRVYNPTTNNDVRRREMFQRIDDKDGIKEYDAKDLYGPEITDKDGALLDAHDSFYITTKSLLVLFQIMGVMPIMRVPKMGRERLANFQSSSNKRFDEVIYNIIFLSILIPHFLLPIASWRHGPQVAIFKNMWTHYQLKYLKITGTPIVFPNLYSLTWGLCVFSWGLSFAVILSQHYLQDDFEYINCNAFGTASRGLAMNLHKALEAEHPALKVAQYRHLWVDLSHMMQQLGRAYSNMYGIYCMVIFFTTTISLYGALSEILEHGLSYKEMGLFVIVGYCMTLLFIICNEAYHASRKVGLEFQVRLLNINLGAVDRSTQREVEMFLVAI…
TnGR2	QEQEQRDLLSSQDGDTCEIHDQFYRDHKLLLVLFRALAVMPITRSRPGTITFSWKSTATMYAVCFYIAATVVVLIVGYERIMILRSIRRFDDYIYAILFVIFLVPHFWIPFVGWGVAHQVAIYKTNWGKFQVRYYRVTGENLKFPNLKTTIVIISVGCLLLAVCFLLSLCILLDGFLLRHTTAYYHIITMINMNCALWYINCKGIKIASQSLSECFRRDVEIECSAKLISRYRYLWLNLSELLQSLGNAYARTYSTYCLFMFANITIAVYGALSEIVDHGFGFSFKEMGLFVDAAYCSTLLFIFVDCSHKSTLTVAAGVQDTLLSIDVLAVDRPTQKEIDHFIQAIEMNPAVVSLKGYAHVNRELLTSAISMIAIYLIVLLQFKISLPKDP
TnGR3	MQSWRKLSILWLRMETTDGLNFSPDKCIRLKAIFVATSILVLASVEHMMSMMSKLDFSYPPAEMLRILILDSHGFLIGPYDYNLGIGIAIFVLSKFATALWNFQDLIIILISMGLTSRYRRLNLYVTNAIAFEKYHEGQKRFGTDLYLHIQLWRRLREAYVRQAALVRLVDKKLGGLILLSNINNLFFICLQLFNGTHSRDKSSALNRGYYLFSVGFLILRACGVVLAASDVHRHSQKAVTCLNNCPSHSYNIEVKRLHYQLTHDFVALSGNGFFALRRQVLLEVAATILKYELVLIQYDK
TnGR4	MMMFYQVARRWPELVQHISKAEEIDPNFDSHLTRKCNITCGIVLFLALMEHILSLLSAFAGAAVCNANMDTYEGFVRHFYPWVFNFIPYSMILGLVTQFLHFQSTFIWNFSDLFVICMSYYLTSRMKQVNKKLLAAQGKYLPEVFWKTTREDYCRATQIVRKVDDVINGIVFISFTNNLFFICLQLFNTLELYYFFSSFCRIVVPKTGPLGGHEAATYFLFSLVYLLSRSVAVSLIASQVNSASSVPAPVLYDVPSPVYCIEVQRFLDQVNGDKVALSGLQFFSVTKGLLLTVAGTIVTYELVMFQFKTPTPQWLAFKENVKNNIST
TnGR5	QDFLYVIRKVFHLSSLFGVYGSKSYMNLLWSAVVLGSLLIIEVMAIWKVIKALAGLARDISGNRSVTARLSGTIFYSISILSLILSSKLCYSWRKLSQVWAKVERSVGVNIPADKTLKRRMVCVAGTMMFFSLLEHVLSIASSIGVDCPVPLMLKRYVLVSHGFIFMGQDYSEWFALPLVIISTIASLLWNFQDQLIVLISMGLTSRYHRLNQCLAKICC
TnGR6	QDFLYVIRKVFHLSSLFGVYGSKSYMNLLWSAVVLGSLLIIEVMAIWKVIKALAGLARDISGNRSVTARLSGTIFYSISILSLILSSKLCYSWRKLSQVWAKVERSVGVNIPADKTLKRRMVCVAGTMMFFSLLEHVLSIASSIGVDCPVPLMLKRYVLVSHGFIFMGQDYSEWFALPLVIISTIASLLWNFQDQLIVLISMGLTSRYHRLNQCLAKICLLEKKQMQSDKVRRVEAVKVYTWRKLREAYVKQASLVRSMDSALGGIIIFSCSCNFYFICLQLFLVITQGPSSNILTGIYYVVSLLWLCVRVGSVVLAASDVNVHSRIALKYLYSYETHGYNVEVDRLQDQLTKDYIALSGMGFFYLNKTILLQMAGAIITYELVLIQFD
TnGR7	MSFYTSNSLFPTTVPIPNGFPVQLNVKPKNKIIFLDVTPVRTPVNPISPNIVVPMRNKLVEPHISNDIIYENIKPVFTILRIMGVLPITRPAPGVSQFNIASASMLYSILVFCSLVSYILYLSLHKVQILRTAEGKFEEAVIEYLFTVYLFPMIAVPILWYETRKIANVLNGWAEFEVVYKQLSIRTLPVKLYKKALAIAVIIPILSTTTVIVTHVTMVHFKPMQLVPYVFLEILTYMLGGYWYLLCETLSICANILAEDFQTALRHIGPAGRVAQYRALWLRLSKLSRDTGIANCYTFTFVNLYLFLIITLSIYGLLSQISEGFGIKDIGLALTALCSIFLLFFICDEAHYASHNVRTNFQKKLLMVELSWMNTDAQTEVNMFLRATEMNPSQISLGG…
TnGR8	QIFNLQSTFIWTYNDLLIMVISIYLTEHLKVHNELLKNAAVQEHFACDEFRTQYLNIVRLVRLINGQFGIYILTSFGSNLYWICTQLFYSLNSIVVFDYQAILR
TnGR9	FSSTGFIFIQIVFYFQYICIQSTFMWSFNDVLTICFSVYITAYFNTLNKVIANAASKNKANVSWATLREHYSSFVKLVKEIDAQVSSFILLSFFTDLFFICLQLFNSLHLLNEETHRYFTPFLSSALTSADYLLYYLYSFLFLVLRALMLSLFAANVHCVAMEPIFSIYDVSPSAYDNEVRRFELQLHHTKVGLTGKFFYVTREMVLKVVGTIITYELVLLQ
TnGR10	MTMIASSWALPYEYPYRVTRIKPFILGVESAKVEGVPGAPLPQQSVPRAERATHCVVGGAHAFILRVRAGASNLLISSVVGLAPLRFESHGAGYTVSISSAMCVYSYILVTVLVICTILGLAAELNVGTQSVRMQTRMLQVASCSDVLVVVATAGAGIYGAPRRMRNMLKFMEDIAMVDSSIGSQYSAVAERKLCLIILASLIVFSVLVVDDFAFYVVEGKKLDREWDVLINYIAFYALWFVVMILELQFAFTALSVRSRFTAVNDALALTARQASIPVEKPKSSSTLNIYAIRVSPADSQRSANVSLLVNDSMSGPSGEPRLVVSPCDAVRRLAALHGTLCDVVTSIDASYGLPLIVILISTLLHLIVTPYFVIMEILVSTNRPHFLFLQFLWCTTHM…
TnGR11	FSTGKSRDYAKQLILLVEGRRSVSIYNIYTLGTRLPVHLLSITASYTVVLLQFALLEYLSNDILEEEFIKSIRLMYDCQKLMAASRVDIKHRFVVLPSLIQKCYTIFSILLLLWLNYIIVVNFNLVMFDNETMYTLCNCVTGLQSLTYVCNLIHVRFFNGDENIEFCVKLQQIERCMKLNRNKSMSALMNRIQIISLAGVAIIFIVLLAVGYGKANVSFWPLLGIVVSQFCFVIELVSCSHIFLYFFVRVRFMNAIMKNFIDSKNFPTRLYMRRLAAQTHNFVSSETDVYVKEILDGFGKFQNIYRFQVFVFCCKLVASSLLTFEFLLLTVQNEALGLWNGLTPSLFTIIDLMIALMLGIRCEVLIREVKETKRLAIRVMSMHFEGRIREKSKRMLKLI…
TnGR12	SAKVIPIGLQHPVRNNLVFRNTSALQSIKILIRIALIFAANRFYLLKPNKVILYLSYIYSISLPILVLLTLLDVDEIGLTYFVFKYTCCFEYIILVSITLLASKKKMWNLFRNLDKFDEMLNISQDLNVIDSGYTCVYWLCGCILYSLIEYSCCLFFLSIFIDKAVYCLYIMMITHECEQILYFILLRNVYFRLRIIKAHVLKVFCVENRTYNRGKLYKVEALSNNARLDISSLHKVYDLLHKCANELNSIMSLPLLIIVLSAGLSTTMLLKMVVQVIQTVTVSNAFGKSTMVYLIGRGMKFTGLVVVPCYYSSVTSSQVAAIRTTLHDAINSLPLDKIERRKMKAFFQLTRESEFTYALGGVIRLNMSLPLSYMSLCTTYLVISIQFSKFFDXXXXXX…
TnGR13	NYYKQNEFYNFYRPVLIVLLICGYDFKVIKSPSIVFTLLVITYCLGLVASTIFASIACCPFDMSQLWSLFEYSSSVVLILFCKSNTAAFFNRIMHIDAYLRINRRHHVQSKWKLVYFTLLTWSVRITYTYFYCCTYPCYDSLLLYSVRQFSLISLDLCRVWRCMLFDCIRYRLKMLRIRLQESPECDYYLYVINNKSIKEDKMKFCLYIYRYIADLVDLISPELHASLFLSVAGSLPKLISNVYHILTAIEGHEPVESLSYVVMHVVQICLLLFSPFVVAEFYSVEVDRIKLLLMHRLIDNDGKNPKMKEDVELFLRYTEIRTFKYKIWRTIPINLTLPLELVNLCVNYVIVVINFTHLYG
TnGR14	VEHILSAYYGFTVAYACDSSNIAENYFKFNMPWIFDYTPYNVWKGVLSELQFINIQCTFNWNYSDLFVICMSIYVTSRLEQVNQRVLAAKDKNSPCSFWRTIREDYNRSVHLVRQVDDVIGGIVFTSFASNLFFICSQLLHTFS
TnGR15	IFWTIPSVALDLTTDNINKIKIICIEKKVLCSNEHHCSELSKLLVFLEHSPFHYTIGRVFSLGFFFFLSCFSFCIVHVIAILQIK
TnGR16	SDESLRFELETTLLYVDFRPFQFTVCRVLPLNAKLPITIFSVSITYAIVIMQLTHFRMIFKVPKSIKKKVPSEWLLKTITLLRIVVGCYCNVHTTRLVHFAIRLYCTFVCLTVVFYLFYSAMDRPTSLGFLYCEYLFFAIIHFIYADDDIKSFCSNIKINDNILGTKKLPLITNWVYYVVSTTALFGVVDFCFRFFGSPYQSIEFFLTRTMVLALDLSQIKLMIMFFIMHSRMKQLRIFLESDNVSINFTGRNEVACSIRRIRKTLHNYDNLLDIMRCLGNKLQLVVNNILLTYLLEIVHQIYIISCPALIVEATTREVDRIKGILNKELMSCPDESLRFELETTLLYISLQPYKFTVLRIVPVNAKLPVTIVSLIITYAIVIMQITH
TnGR17	MMSRKSKQNFSDEKSLRIILKTRLFFGLYYKLSSSSNVCAVIKFLCLLIAVSHIVLYYTYTYECETTAMYSVFELAETVVRVFISLFTGEEYLMKFSRILYMDLRQTFHVTYKNFAVKLVVLFVVFAEIMTIALVGINSRLIDIVGYITFLHRFMICLSSRLTTIYLLDNYRFSIRLVKKALIGKWKNANVTNSDKIELIENFLSNYMKVINNLATTLTVTRITVRLCYLLLCLPAILVELAINDLDEIKSMLSEQLLINKDKKLRGIIHDGVEYISITSSYSMWNEFPIRINLVLGFLNLCISYIIVLLQFTY
TnGR18	VYLIGRGMKFTGLVVVPCYYSSVTSSQVAAIRTTLHDAINSLPLDKIERRKMKAFFQLTRESEFTYALGGVIRLNMSLPLSYMSLCTTYLVISIQFSKFFD
TnGR19	INKLVLVENILGVYRNYTVIGTLGKFLAIVRITFEIGITVLLFFMNCNMVFSPPFNNQGGKSWLIIIYHFQNLLSTTVIIICGIYSSGYYKLFLEDFLVIYNCLHKNSTLTKRLKRLKIFFVVSTISFSISSLTFTTYRELSKKLYSSDVTTWLMTMSEVTIEVRFIMEHIVFGTFVYMVHSFLLCLNNEISAIQTKYNIREKMLYSDRRQDDIILTVEQVEKFTVFYQRITTCCKNLSATFHKQVCNKLLYNNNNFTLSEYGVYKDQSKRNTTTLTSHTSIFLFDLQTNISLLM
TnGR20	MSLLRILVFVENVMGIYRNYLYFNKYLKVLIMIRVILEIVVSLGIAWHNVGVSVYKSIETGEDVLVLLLFQAIILMKVFVLGIGPVRKAMDYKLYLENLKIINNRCQDIPSYAKSLNVMKLKCFVVAILIVSSSVVLSITRVNDLNTKNPLIFVNAMVEECYETWVDYRYIIDHLVAYTGIIGIRDCLKILNESVHDVIEQCSKEQEEHFEEEDRTKTDLVKQVNGWMEFYGYIMSCKKHLSRCFSNVLNEVKL
TnGR21	KTRVLMKNTVDEDLQSMLLPLNLGKTSLIIQNTVNKDLQSMLLPLNFIPNIMLFPKYTIRKDLILSNSMIYKVAGFCATLIYTAGYAYRAYEAYIDESLIADYTALYINAFFDPFFYFYGFFMNFVVSVIQTTSNIEFVLSYQEVYNVFVNRIYFKNVIFWNWMSVIMIIIYYIITTFFSATTNFSIYICFNDFVMIIIDTNIIYVTALLNLLSDKLILMNLEIKSLMQNIMLFPKYSIRDNILYPNSMLFKFIGLCAAIFYSAMGAFRIYGFHNDQTIRLHFEEMYMSSYFDFLFYGYGYFVIFILNVVQTNTNVKLVLNYQKICLDRQLY
TnGR22	MEVLLDNKVDTDIQSMLLPLNLMQYVLFSPKYSLKNNFITTNSFISSACALLVVLCFISVFAYRIYFMHSNKIMTEYFPFLYLSSYPDIIFYSIGFIINWFTNIALKHPNLLLVIKIQEICKSLNFDTSFYKRFTFYNWMCIIVINAYFVVILLQSIYLLGFLFLYIGVIFYGYVFFDISLSYAVVVMKFLCLSLKHWLKEV
TnGR23	YRVEILLNNLVDKDVQAMLKPLNILQLLTFCPKYQIRDNFITSNCRVSNLFSLLGTMVFLGILTQRLSMSYKLYLQTVFFILEWCDVTIYYIGFLVNFLVFLMYSDHNVRFVLLFQDVHRLLNDEVQSLYDKNTPTVFFITQWIDICIHVIGFVVNFVVCVMYSGHNVMLVLSIQEVHRRLNDEVKCKSFNFWNWFLLFFLNIANMTMFFYFNISTHTFSLDIDVMTSLVFDFNIIYAIRILRLLESKVVLWNIEVIQNVRRKLKICDKKDVKSNWLIVICLNTFYIFYTVYFHYMFPKITVLIHICVYLLICFDWNIIYATRILKVICDCVMTWIEDIEKIVSEFVWDKMFNAYMDILDVYDLIERTLGLHVTYYIIYTAFQGISNVGWVLNLQNGVQ…
TnGR24	IYRVEILLNNLVDKDVQTILMPLNIMQLLTLCPKYQIRENFITTNSRVSKLVALLGTLFFIAILVKHRIIDHGEILLNNYVDKEVQKILMPLNILQRITFCPKYRIKSNFITPNDGSTYVISFIFTILFIVIQIANLLFMYYHPSVPAAVLILSIYCKLLHCYGFAMNFIVCIWYSDHNIKLVLAFQEIHRIINIEPSVIQFNMFSWVILVFCFCFILVFYALFVVFMEVALTDMSAIIMVTFDLDIVYAIRLMELLKSKVVLWNIKALEAKDLENKDEELYDKKLFEVFCKIIECYELYKATYQHSTIFLPLDVMSAVTLYPKYRIQDNYITPNSRVAINLSLLGTITYISLLVCQFTLMYYYYENSDLIFFVSIYDTFHYCFGFFINFIPCLTYSEY…
TnGR25	INTWLVKNLLLHGLLTHSCENFYKAQENIRDTCALILKSQCSGGWKRFCKNIQRMQKTFRKVSPCGLFVVDASLPLRLYSVLGTYGIVKLQFLFEFGIIINWYSNFKEKHNNVLLVIKMQKICRSLKFDVNYLRRFIFHNWLCSFVDIISFILLFSDFMLVIGFAYIFHIIIIFFYALFDANMLYSASVMKFLCISLKHWLENLQKLVYSEKQIQNRDWDRMFEVYMDILEVYQLSEGTLVILIYYFVSRLY
TnGR26	DNIIEKDLQSLLKPLNFIQNLFLCAKYKIKDGRISPNTMLYKLASSFGTAIILVINNYSVFDSVFWDIVYTLLVFVFVINWVDILIHFIGFVINFVVCVMYSDHNVIFVLFIQDVHRFLNDDAEFKSFTIW
TnGR27	RLTNYRVEILLNNVIDKDLQKMLLPLNIIQCLTFCPKYQIRDNFITSNCRALNVVSLLGTLVFTGILVIPILANHISSFFIMPVTTTVLIANVCDTTIYFIGYVVNFLVCVMYSDHNLMIVLSIQDVHRILNDKSQFKSFTFWNWFILFFVNFYRVEILLNNLVDKDVQTMLKPLNIMQLLTFCPKYQIRDNFITTNSRVSKLVSLLGTLFFLALLIQRLISSYDAIVPKIFFIVRWGDTCTHFIGFVTNVVVCFKYLDKNVIFVLRIQDVHRVLNDGAKFRLFAIWNWFIPFLYNVVSIMLFFYVTNKVNSAFFDVGLLTLLVFDYNMIYSIRILELLESKVVLWNVEVEILLNNFVDKDVQTMLKPFSVIQTITVYPKYCIKNNFITPNSRRSNLVS…
TnGR28	KIDKDIQSILFPLNLFHNIMLCPKYSIRNNLIYPNSSKFILLGLFAAFLYSAILAYRTYKYHTLEIIQTHFNFAYISTYFDVLFYTYGHFMNFVLSVLKTKRNISFVLKYQKVHRFFNTSAHFPSIKLWNWIGILFVITCYLINMFFFITEPRKRVFKNVHRVLNASFEKISVCGLFVVDATQQRSIVSLTATYTIVILQFALL
TnGR29	QYVLEDDFQLLFEPFNVMLSLFISRKYKIKDGVLTINSFRYNVISFFGMLLVSAIRIQHSLSFTFTWRGMSQVDSCHHLFNVFFFSSGYLLIYILNIVQKSKNVKLVLKLNNLNKRFKLNADCTKCFIKLNWILVVFGNSFYIFWIIFCFSSFKVSIFTSCFDFYKICFDINILYATVMIKLVVGSLKKWIADLQNSQLDANLLTETYLNRMWDIFMNILEIYQVIEKVFRPFVSFF
TnGR30	YMPAVSSMMRFLNWAIVCIIVAHHAEITYREHEKVLEIIDQILYNRNNSNKLRMTLAELRNLIVTRPIKYHAAFFFTIDYTVLVSMASVVVTYTIIMLQSM
TnGR31	PQQSVPRAERATHCVVGGAHAFILRLSSVFGLAPLRFESHGAGYTVSISNVKCVYSYFLVIVLLAPASGEPRLVVSPCDAVRRLAALHGTLCDVVTSIDASYGLPLIVILISTLLHLVVTPYFAIMEI
TnGR32	MALFRRLIFIENVLGVYRNYQFFNNNVKKLVITRCIFEIVIAMLAAAVNIKIFSSVYESAGNYKFISYSHQIVVFTKALYRTNRVSNLCDGIKKMNIMQALVFLENLMGFYRNYVCLNTSRRCLVIVRTIAQAVLFTYISAANIVVFSDMSTDLPSTKLASEVIHIFFWSQWLVITIGSIRHSGSYQLYYENVNIIHNRSLCNPHYVKSLRKLKLICKMTIIKLLVYFENLSGIYRNYLYFNTYQKCWVIVRIIVENLLTTYVIFSTIVFISSLSSLSHHDQLIRCVTELHVWLQCLVITIGSIRHSRSYQLYYENVKIIHNRSLSNLYYVKTLLILKHIDYPLLFHIVGNFALLRAGQNILNETSTLNKALARLFNVIQLGNYKYDHKNGKHLRSDSK…
TnGR33	IMPLKYLMFIEKSTTVFRNYSIMKKRYRILTGSWMFLELLVLSINMYKYIQEEMSGFGVKAQKIYFFSVSGFSIYLIIAALYHTRAFIRLLTNFDAFYAFFDDVVYNEVMKKAQKHLALIVLFFCLAKMILFAYIRLEQGDYNGDIGLVSFTVSNYNLSSCDFRYVYQYFILHSLLFVISEQLKAIMRSIDKVIETTWTDGGYTAQGDTMKPVTVTMERLDMLDKWVNAYKNINDSCNLWNRMFRTQLTIMILIMTAYYIILLYSVTILTVESAVKVHIQHWLP
TnGR34	TVFELLLFRLKALRKQCKTDLSAMRTFNGDIKELKYKVNKFMVIYKDLLKTLRHIETPMKLMVNIKRVLISFTVRILKVKSREKYYFELYRFKDVAYESSRKVVNDALTFLKHRNFRYTIWRLYEVEVQTLAAALKNIITFTVAMVQFAHFCDVEDMVMYIEQRSFKYTIWRLYVVDVPTILHAIKFITTYTVAMIQFAHFFDLKYLKRFLDLISGVKAIMFLRLVGGLYSTVSHNKYINLAVKNYCIFFTIYVICASIPILQTLSPSSITLRIIRIFQHAVTVGINLIFGGEYFMIFFHNIRNVDISLGVKPTCEALFTRILCILLLLFQFSVIFIICNVNEVPCQMISSEIYALTVISTMSCLSHSTKVLMFEMILYRVKTLRKLVGTDLSTIRRFE…

## Sheet: C
Ionotropic receptor genes in T. ni
Gene name	Pepetide
TnIR7d1	MAISDYYLSSSTNDNLNLGDEAVKVALQNFNLQYTTFLYFNTTFFYGVELFLRVFGHKVVVNRGHFRPALTRKLSQFVIFGSDTSEVEQFFNVIKEYEMDNTGKFIIVCQSTDSIDCDERTLTRMLWDYKVVNVVIIKTETTQAVCYTYYPIADEACNNTAPVKLEKGQYVRTSFGAVFEMKFKNLQLCPLIGSTFIQTPYMNLVFGKPVGSDGDLLRMIAEGLNTSLEMMTPHRGDGWGWREPNGTWMGSLADVDEEIANFSMTSGAVTLTRFSDFQMSLNYYTSNVVWVSHVAPVQNEALKLMHPFRAYSRIALIVSFLIVVICAFFVKSWFWTYMCRTSNAETPSKSVVFYAWMVCMGQSLIKMPTKSSFLQMTMLWVWYCFLIRTAYQVYLISSL…
TnIR41a1	MLVPASPLSPLEILVKTIIEQYLATSYCITFVSDVPFNVFLATGLTYLIPSEQNLVEQILNVSEIGCSDYIVRMQEPQKFMVAFERVVHIGDIRRSDRKIIILPYDEDYNENREIDLSSMVFSMKESNFVANMLMIETLNSESDCKLFDLITHKFVGPDEEMHLPIHLDRWDSCREKFEKKANLFPHDITNLNGKTVKVACITYQPFVLLDIDPAIEPLGRDGVEVRMVEEFCRWINCTVEVVREDEHQWGEIYENQTGIGILGSVVEDRADLGISALYSWFEEYRALDFSAATVFSAVTCLTPAPRLLSSWETPLMPFTWFMWIAVVFTYFCTSIGLLIAHGCVTKSYPFLNVFGMMIGQSLYENSASWTMRRVTGWLLIPGLILCSAYGAGLASIFT…
TnIR41a2	MQEPQKFMVAFERVVHIGDIRRSDRKIIILPYDEDYNENREIDLPSMVFSMKESHFVADMLMIENYKSDTNCKLFDLITHKFVGSDNEIQLPIHLDRWNSCTEKFENQANLFPHDMTDLYGKTVKVACFTYKPYVLLDIDPAIEPLGRDGVEVRIVDEFCRWINCTVEVVREDKDQWGEIYENQTGGIGVIGSVVEDRADLGITALYSWFEEYRVMDFSAAGVRTAITCIAPAPRLLSSWEMPLMPFTWFMWLAVVFTYFCASIGLLIAHGCVTTSYPFLNVLGMMIGQSLYDDSASWTIRRVTGWLLIAGLILSSAYGAGLASTFTVPRYEPSIDTVQDIVDRKMEWGATHDAWIFSLTLSTEPLVKQLVSQFRIRSFDELKRKSFTRSMAYSIEKLP…
TnIR1	MTIEVVVVSIVVAHKLREQNVRISVKRIDEHMNIDLERLMLQRTAPVGALLDAGCDVTTRILSQASSSKLFDATHPWLVLTDKHPDDSTAYIDDTFGSLNLSVDADIVLIEGRYVFQDVFNFGKIQGNSLEKSLLGTWEPKKGLEMLATGYKYYRRWDFNNLTLRAISIVDQPEVFFPEMLSDMAYTEGVAAMTKITSQMLNTIKEQHNFRFNYSIAGRWIGSPKRNSTLAVTNALFWEEQDLSSTCARIFPKWLDWVDIYHPPTTNLQTKFYYLVPETGVGQYENRFLTPMSAGVWCCALVAGIACTLVLVVAAMMESRPKPGLYAFFSVFAAVCQQGYEDGVQMVEDTFSSQGRRVTLLVIGLTSMLLYNYYTSSVVSWLLNAAAPSIANLDGLINS…
TnIR31a	MWVQAVAEFFKYKVVSSIIVLACWPPKEQIRIIGEISHHGLSATFSCDPGILDYERHGYLQGVLYLVGNDDSFMFKKETHFMANYKWLILGEYIPEELRSVRYDADVAYLQWKNHNSTSGNASAIDDVYVHPRDGVSAHRWAYWASSTGFVLTHDRERILRRLDLKEYPWRIATPVCKDILIENELWATMVNNDSMYLMVSEGTADLSGAILRILLARTFDLDYVVPIWPFSVGFTYLAERESASNMFLEPFSPGVWWSCLAIMAVLALVERFTAKTPLEKDGAFYTVLTTWLQQDASAVPESASGRFAFTVLSVSAMLVHAYYTSAIVSALMSTGRGGPDSLRALADSKYAIGSEDYDYMRYLFFDVETNWEDLEYLKKKKKTSKFYQDLSRGVELIQ…
TnIR68a	MDLFFRALVNAKSSASFPILTELHQRGELEGLVIDLLYVVRKDYEVKCVAIICDEVYLNVFAGPLFKRTPGVPFVMTVVEDYEDLLSPNYHTLKSLKAARKEGCNVYVILLANGLQASRLLRFGDRHRIIDTRAKFLMLHDIRLFHRDLHYIWRRVINIIFIKYHRKNIGVAKSKAWFELSTVPFPHPITTVFVPRRVDIWKNDNFHYKRPLFVDKTHNLNGKLMNVVYLDHIPSVVVVKNNDSQKVGGVEVEIMHTLAQKMNFKPRLYQAGNSDLHKWGQKQPNGSFSGLLGEMVNGGADIALGNLQYTPYHLELTDLSIPYTSQCWTFLTPEALTDNSWKTLILPFKLYMWIAVLLVLLITGTIFYGLARNHKNLQDYKKFQNAISGKKQIDDDKII…
TnIR7d2	MKIFARFLLLKIFFFNCSARNLVENAVFVSRQYYEHHFATTVVWSEDSEYVDDFLMNFPGTVVLKPLLNNYDDAIRNSNDTGFEQTVFFASSFRDYENFMKIIDEFIRYPILFILVIESSIEQSDLWKYIKVTWENDQGDIVIISADKAGNVTLSTFFPYSDETCENYNPVILKPNDNLFPNKFNNFYQCPVRASVMQLMPKTHIIRSNENVTTVGGYDGSIFMIILDKMNATLDVTSVDNHQAYGAFVNGSLVGSISELVSERADILIPSGILTRRRYLVAFASHIYHTIDIRWIGPRRREVYNWLKVLIPDNTQVSPFQAIVCVAFLVMTIIIHRLKRHLTHRNSCILLHVFLIFLGQSTKFETKSTLLNSFLSLWIWSCFIVRIEYQGDLYQSMQT…
TnIR7d3	MMTTLKVLLLLPFLLSECTATSKLIEKAIFVSSQYYQHHFATTVVWSENDSSYVEEYLRNFPGCVVLKPLKTDQDDNTINLFNEVFGFRQTIFFASNIHDYENFMKVINEILRYPILFILVLESAVEGSAELREYIKVTWDNDQGDIVIISADNSNEVTLSTFYPYSSGICRNYDPVVLKRDDDLFPAKFDNFHRCPVRAIVMQLFPYAQVVRDNGIIVGIDGQDGAIFMTILNKLNATLQVTAVDNIKPFGEKVNRTVTSSISDLAMDKADILIPSFIMNQKRYSKAYASHVSHTIDIRWIGPPRRNVLSWFKILVPDKTRVSPIHGVICVLFVTVSLFIQKLKKHLTSRDNHVLIYSFLIFLGQPTKFESKSSLLNYIFALWIWGCFIVRIEYQGDL…
TnIR75q	MKRIFLFLILCGLSYGQEVPTGAIVDVIHAAARSSSVIAKLCWSPSKILDFYSTLAEQYTQFTTGEVINGDDAQFYDEEHHAVFLADLECPDIIKYFQNVRTWNSARNFFRAPFRWILFGSFRNNSQDVVPEEIASIDVLVDSEVVVIQSNKDIYEMHFIYKISSNHTWKTEFYGTWDATNRFQKSKQLSEATALRRLDIEGYEIAICYVITNNESINHLTDGVDDHVDTITKVNFPTTNHLLDFLNAKRKYIFADTWGYRVNGTWNGMTGYLVRGEVEIGGSPMFFTFERISIVDYIASPTPTRSKFVFQQPKLSYENNLFLLPFNTTRQRDSGVLRANISDIIILMFGAACQQGSPCELKGSLGRVVMLVLFLALMFLYTSYSANIVALLQSSSSHI…
TnIR25a	MTTFVSLLLLFSSFRIVFAQTTQNINVLLVNEESNALAEKAFEVAKEYVRRNPSLGLAVDPVIVVGNRTDAKEFLENVCRKYNDMLSAKKTPHVVLDFTMTNVGSETIKSFSAALGLPTISGSFGQVGDLRQWRALNPNQTRFLLQVMPPADILPEAIRAVVTKQDITNAAIIFDEFFVMDHKYKSLLQNIPTRHVITPVKSFEANEIKTQLESLRNLDIVNFFIVGSLRTIKNVLDAADKNQYFGRKTAWFALSLEKGDISCGCKNATIVHMRPTPDANSRDRLGKIKTTYSMNGEPEITSAFYFDLSLRTFLTIKSLLDSGKWPNDMKYITCDDYDGKNTPNRTLDLKTAFQEIKETPTYAPFFIPQDDPMNGRSYMEFSTDLLAITVKDGASISSH…
TnIR8a	MLCSAVSKGVSTIIDLSWSPWELAEDLSSATGVPLIRTLLGSQQLIKGIDDYLESRNATDAAIIMESEADVDRTLYELLGVSNIRVWVHSGLTRDSARGLKAMRPEPSFYIIVGESGFVMDTYRRAVKEKLVRRSYRWNLILTDYSTLDLNQLILPTVILRADPVECCKLIRRENCTCPRDFQKKQKTLDALVQYLSETYSKLESELSPMRTAVDCDDPQMVMNSTRERLFRQFVEDSETNNETVLYWDQDRSGLFLRSRFILSTYKDGLQTIASWSAAEDYKLLPGIELEPLKMFFRIGTAPAVPWTLPKLDPQTGQQMFGEEGQPLYEGYCIDLIARLSETMSFDYEIVSPRSGGFGRKLPNGTWDGVVGDLMRGETDIAISALTMTAEREEVIDFV…
TnIR85	MYNSFRQWFFTITFCEFTYFENRILKYTETYGYGYNVMLLNGCPDSNGSFVKPKYNRHGETAYLVTSNELSIDVSETVINTLKRTGVFKPRSAVIFVINTPVELDKYFYHALRNHFKLLWSTSVTNSVLILKTNELKMYTYNPFFQEVKDITYVKDVSHLLSKQYNNLYGYELRLSVFKKVFISDTPGPVRCDSRLAKTVIQFLNASCYAVPPRDDSTVGDLLENGTATGVTADLMDGYTDLELNSRILKNTYYGYIETTYPLVQDELCFIVKKSELQSAFKTTIKLISMELLLLFFFTFTVFLIITTLVRKVERNILKINDNQTIGAILVDLIKCFIRQTVDFKFMGPLFRYLILLILVYSLIIDCAIDGIITSAITYPRYKPDINTMAELAKSNLTL…
TnIR93a	MPVSIQSYSFMIARPRELSRALLFLLPFTTDTWLCLGLAVILMGPTLYIVHRLSPYYEAMEITRQGGLATIHNCLWYIYGALLQQGGMYLPRADSGRLVVGTWWLVVLVVVTTYSGNLVAFLTFPKQEVPVTTVAELLDNKALYTWSINKGSYLEMELKNSDEPKYAALLKGAELIPASVGPANSALSKSALLQRVRLHRHVIIDWKLHLSDMVNSDRMESENCDFALSVEEFLDEKVAMIVPAGSPYLPVINKELERMHKAGLITRWLNAYLPKKDRCWKTSSVMQEVNNHTVNLSDMQGSFFVLFMGKDK
TnIR87a	MLTVLRTILFFIHLTSTMSENPLLMTTGNSGQITKTAECVLKLSAKYFVEKKALSGSIVIININSYTSTTQGLLLQTIHSGIKYSIMVKDSFYPHANASHFPEKAKNYMLILEEKSELERNILQLNKLPTWNPLAKAIVFYQLKQDETDVETAKEFINKLRNYKLFKSIIFIYDDYNDVVISFTWRPYSQTNCGGLCDSVFVLDRCTNNTIYEFEKQHDMFPSDMKGCPLVAYAVVSEPYVMPPKKQLTNSSFDDAFEFAYGGEINLVKIISHFTNMSLIIRTSDVLENWGVVYPNGTATGAYKVLRNDSADLVIGNVEVTRILRKWFHPTVNYLQDEMTICVPKAGQAATWDNLVIIFQWSTWVATLFSLIVMGLVFHYFYYREHRNATKWPTNSLLM…
TnIR40a1	EQSFNSFNYATFFQVWPLVFATLLVTGPALWIVIAAPSLWQRRKCDQLSLFSSCCWFTTTLFLRQSSSKEPSSTHKARLVSVLISLGATYVIGDVYSANLTSLIAKPARERPIGTLADLEEAMRDYGYELVVESHSSSLAILENGTGVYGRLANLMRRQRVQRVRNVEVGVRLVLSHKRVAVLGGRETLYYDTERFGSHNFHLSEKLYTRYSAIALQIGCPYLETFNNVLMTLFEAGILAKMTTDEYKNLPEQARRSDPVTESDKQSSDVMGDSAAASQPQGESTKGLQPVSLRMLRGAFCLLGIGHLLAAISLAAEIQIQRRSKKKRQPEVSEQKKTQKLLVLGKAVVLFKRGYRRVCHSVYTGMDRALGPE
TnIR143	MMWKLLICFILNVSCSHRADGIYLKNEVAVINEFESITECVITLSGLLNMSPTFTILKQKDEDNKENEFIEQLVRSLAKHNTPQAILEDVTDHDEDSHDLYINSLTVVFFGSCEEAIQFDYKNVNKIKYLIVISDPTSNDCGKILKAIKETVGEFDVTFIIQDFSSDINKIYTIFPYKDINTCEMVHKLTHINTCINSTLETQEVFPMKTPTNYNKCPLRVGMATLFPFSTIKDHNSLKSYDPLEESQIKGSDLEMLKVISKHFNASLELHYINRSEENPYVDTELLKFLFNDSLDICAGGLYRIYGDVVAYSGIYSRQDVLWIYYGQRSERSWENLIRKMYSSYIFIIFYFTYSIIWYFICLFDGNSVSFTNTLLYGWGGLVGATSIQEPRSAKQKVI…
TnIR21a	MNKRIKQNSTNMKVFWFCIILAGYIFCQEVVYYPSQSVLDTHYKNEVKREIKSISNTSEVAYEIDGECYENITWRRFNEDKYSNNDLKIHKRALDPVFHGYPKTREELWNERFLNESTNFDQTPSLIALLHNVTLTYLTDCTPVILYDSQVKSKESYLVQNLLKGFPITFVHGFINESNELSEPKLLRAKSECLHFIIFLSDVKSSAKVIGKQPENKVILVARSSQWAVQEFLSSAMSRMFVNLLVIGQSFKEGDDKTLETPYILYTHKLYTDGLGASKPVVINSWTHGKFSRNVNLFPPKMTEGYAGHRFVVAAAHQPPFVFRRILSDLDGGNPRVVWDGVELRLIKLLAQRNNFSIEIIEPQEPNLGSGDSVAKEVMMGRADLGIAGMYMTIDRARE…
TnIR60a4	MLVRVLFAALFLNCKCANITIGRNQRGHQNLIKCITSTIKEYFTTGSSVAYVDMNPDDDELLRGLHSTATVPLVLRLPTARLPVSNSGYLITARTVEAFCNGFKDMLRDFKWNPSARILIVIKSLKQFELKTIFDVLLKQHVINVVVVNGTDDALLYTYNPFDHYGCGRNYKHVEALGPCLQTDTNLFPNKLVTGLRNCTLRASVPHRPPFAINPARVKKGTKMGAEQYALQLITEPEEIKVKYTYDFDFETYTTITPDSEIDGPLDKLNKGEADVMFGSAMVVLSRIEAFTFITGYLDVNDEILFLVKRSENVPAWKVLYLVFQPSVWILLITCHLMYGIMITKLIGAKDVTSIALKLLVSLVGHGCKIPRGRKAQTLFLIWIWFGFLMNGFYQSILY…
TnIR60a3	MKTGLCSKMLVLVFFATSLLNCKCANIKIERNQPGHQNLIKCITSTVEEYFSIGSSVAYVDMNPDDDELLRGLHSTATVPLVLRLPTARLPISYSGYLIAARTVEAFCTGFKDMLRDFKWNPSARILIVIKSLKQIELKTIFDVLLKQHVINVVVVNGTDDALLYTYNPFDHYGCGRNYKYVEALGTCLQTDTNLFPNKLVTGLRNCTLRAAVPDRPPYAINPALVKKGIKMGAEQYALQLITEPEEIKVNYTYAYDFETFTTITPDLKIDGPLNKLYKGEVDVMFGEAFLVAARAEAFTYISGYLDISDQMYFFVKRAPDVPAWKVLYLVFQPPVFLLMTIFYLVYSITAIKFLQAKDASSIALKLLLCLVGHGCRIPRGQKAHILFLIWIWFAYLMN…
TnIR60a5	MVVLLVLFALLFLNCKCANITIGRNQPGHQNLIKCITSTVEEYFSIGSSVAYVDMNPDDDELLRGLHSTATVPLVLRLPTARLPVSYSGYLIAARTVEAFCTGFKDMLRDFKWNPSARILIVIKSLKQIELKTIFDVLLKQHVINVVVVNGTDDALLYTYNPFDHYGCGRNYKHVEALGPCLQTDTNLFPNKLVTGLRNCTLRASVPHRPPFAINPARVKKGTKMGAEQYALQLITEPEEIKVNYTYDFDFEIYTTITPDLEIDGPLDKLNKGEADVMFGSAMVVLSRIEAFTFITGYLDVNDEILFLVKRSENVPAWKVLFLVFQPSVWLLLITCYLMYGIMMTRFIGAKDVTSIALKLLVCIVGHGCKIPRGRKAQTLFLIWIWFGFLMNGFYQSIL…
TnIR60a2	MWFACFLVSVLYVSGQCENIMETRQFDNEHSLVQCVTNILKLYFSEGKLTYVEMESDDDELLKNIYSSSKFSLVSRRSTFQPHLPNQGYLMTSRDVTAFAKHFKYLLMDPMWNPYTRVLIVIRSLSESDLRNAFDVLLNHHVNNVVIVNGTADAHLYAYNPFDNHACGKYYSDIISYGICSQTEMNLYPEKIGARLKNCTFLASLSHRPPFSIDPARTEGENLLGTEAYIFKVLMEKEQINFIMNYNYNGDIFSTVAPNMTAIGPMNMLQNNETHVIVGGMMMVAARAAAFSYLGGYHDYNNEIRIIVKTASLIPIWKSVYIEFDITVWMLLFLTLIVYTMILIYVFRDMDKGQLILDLLDNLLSHGRHIRSRTLVKCLLLVWIWFAYLINTFYQSSLV…
TnIR60a1	MLVVYLITFVLYHSGNCFKILPTTTYNENIFQCVTSIIHKYFTEGSVITHVGNNVDDRELLQAINNANIITMVSRQAPIKLIIPHEAYLISAYNASHFAKNFKKLTRESAWNPLARFLILVEELKETELNVIFDTLLRWQVINVVVVKSTEDPLLYTYNPYDNYNCGKRYDTVINYGKCSHAHSLDLYPEKAVTGLRNCTLDVVISHWPPFTIVYSRDSNNISSELAKGLEPYLLRLMGETQGFKVNILDDYDSENISTVSSDMRATGTLKKLQDHEVDAVIGGMLLIPSRALAFSFIDGHLGYIDEIRFIVKRASFMPDWKYLYLEFNLTIWALLILCILLYSVLLILLLRPKDKTYVVFWVLESLILHGRNVRSRQSVKYVLILWVWFSYFMSTFYQ…
TnIR75d	MELINFIISYFLTKDLSMLTAFVCWSHQQSWELQRAARAAGLRVALARDSRLAPSAPLGRFREAPGAVEAALAAHDILPDADVVWAAADALLDVYKVKPGLPTLQTGLGLARDCSRRQLAALWAALPTAVSRRRNLQNVFLKGVTIITQPQHFRGWSDLHNRQIDTFPKLTYPLMMLAAQDMNFRYQLRQVDLYGVSNNGSFDGMVGLLQRHRAELGLASLFIRPDRMLALDYFSETYVLRSHDTSCHHLGVAIVLTDTENRGKYRSPFIFRQPSRSAVSNVFLLPFSGGVWAASGGVAAVAALLLAALRRAPAPPPARAQLLHLTLPDTCTFALGTLCQQGFHITPAVSSVRMVMFSTLMTSLFVFTAYSAKIVAILQTPSNALQTIDDLVRSPMTIG…
TnIR75p3	MKIIFKAFVIGLLLVNKVVYARDLSWAQFVTRYVANEEKPTFLILSDLCWGKNVIVNLVNEISKIGGRSSSEIDIGSKYTHHNLLFLIDLDCPGAKEIVKYRNLFRSPYRWLVLTSSADHENIGVLNNLPILADSDLVLAASNGSFFKLVELHKPSVNGSLVSSPRGFFNGSLIEVRPHRELYRRRRDVMGHAITISNVIQDSNTTQYHLEDLMEPHFDSITKICWMNVRLAFEMLNATPGYIYSYRWGYKVNGKWSGMIDDLFSGRADLGTNCVVSNIERLDVVSYTDRLAPFRVRFIFRQPPLPYVSNIFSMPFSTSVWIAMSVCAMISTLTVYIATKCEFRGSKGPTQLDGIGDAMLLTFSAIGQQGCDMEPKRLSGRIMVFVVFTALMALYAAYS…
TnIR40a2	MKVIIQRKTRNNLIRAFGLIFLCANNVHCFFDIRDVTSDVMTRLPEEFSVAVKDIAEGLPTKSITIVRGNSTNIGSNDIFELLCLLSQHNILTTNLDIATEDNKQKYYKLLKKALDVSAERTSLILCEPHECENILYELTENNLIHSMILYVFYWSYGTVSETFLMTLKEAMRVAVITNPRDRVFRIYYNQGQADRLNSLTLVNWWSGRLYKSPVLPPAGKIYRNFKGRVFEVPVLHAPPWHFVKYNNDNTITVTGGRDDKLLALIAKKLNFKYKYYDPPDRNQGSSISSNGTFKGTLGLIWKRKADFFLGDVTMTWERLQAVEFSFMTLADSGAFLTHAPAKLSETLAIIRPFRWEVWPLVFATLLVTGPALWIVIAAPSLWQRRKCDQLSLFSSCCW…
TnIR75p1	MNMKIIFLVIFFFITCVKCIENSKIDMVMSFVTLESKPTTLLMPFTCWNQYTLKSLARSVSTVGAGIATSLQYNRTQFGIQYVLIIADLSCPGTDRFLASINKYGFFKAPYRWLLLGYEEDMTVLNTIDILVDSDLVVTQKINEEEYEFLEAYKISENSEVIFTKRLKWRPQKQKNADFSLAVLDNEKTFPKISVNQYGVIEDHRTSLVISARRRDLRGHVLTMANVITDSNETRKHMNDRLNLHQDSITKMSYAVVKICFHMLNATERLIFTHTWGYKDKNGQWQGIVDHLLKKEADLGTLTIFTQERMMAVDYIAMVGSTAVRFVFREPPLSYISNIFTLPFSGAVWLAIFICILGCSIFLYIASKWEATMGMHPLQLDGSWADVLILIIGAVLQQG…
TnIR75p2	MKVILTILLLFIHSSVRAKDATTLNFIKLFIKNDGKPTHLIYGGLCWKKSTFFLYFTKSVLLKEEKLPLLEDGPVLVDSDLVLAERVGDQFQMVEMHRPGINGTMIITPRGFYNGSLVDTRPNRELYKRRRNMMGHPIVMSNVIQDSNTTRYHLPREDRLQLQYDSITKACWAAANIGFDMLNATGRYIFSYRYGYKVNGQWSGMIADLYNNKADVGTNCVIFRDRFDVVTYTDLVAPMRMLFIYRQPPLAYVANVFYLPFSTRVWVTIAVCTAIATVTLFLASRWELALTKTTTQQQLDGGICDALLLTMSAVTQQGCYIEPRRAPGRMMLFVLFTALMALYAAYSANIVVLLQAPSDSIRSLPQLAGAKITLAANDVDYNHFVFVHLQRFRIKAENL…
TnIR64a	MNLVSNILLTFTIADVSIIIDLFKHKNIKNGIIFHCHDQHLMNNVHRILNDNDIFMTSAKTGFDTYKVTKSYPKVGVILNTACEGWTAVLDSGKFPFQDYFFLIFTEHLSHTTDILSDYPVEVDSDLIIAHNALQLVNFYEVYNTGFKFNGTFNVKHIGHWNSSLFLKASDRRNLQGVFVKTAVIILSSPKIVNQTIEQYMEKPIKSQIKVDTVHRMKYFIMMKFMRDMFNISYDMHRVSTWGYQRNGSFDGMVNALYRGLADIGGAPVFFRIDRGEHVQYISEVWMSRHSFIFRHPKYPRGFYTIYTRPLSDVVWYCVIALLVVTALVLWGMLVVQNNTGDNEDSSLSFAGLVIWGAICQQAVTMNREATSTKLVIFLTFVYAVTLYQYYNATIVSSL…
TnIR76b	MFLQNTPLSWIENHNGTLVGKGVAFIVMEILRKRFNFTYDVVEPRKNFELGGRVPDDSVIGLVNSTKVDMAAAFLPTLRPYQEQVSFSIILDEGTWVMMLKRPKESAAGSGLLAPFNELVWYVRYLVLAAVVTFGPCITFFTRVRTKLIEDNEGVLPLNPSFWFVYSAFLKQGTNLSPEANTTRVLFVTWWLFMILLSAFYTANLTAFLTLSKFTLAIEDPKDLYDKNYRWVTSAGSSVEHVVKNEGDELYYLNSMISNNHARFLSVRNDKDFLDYVKKGAVLVKEQTVVDHLMFFDYNSKKDVEESDKCTYVLAPKAFMKKQRAFAFPIGSNLKNLFDPVLTKIFQAGILEYLKRSDLPSTKICPLDLRSKDRKLRNSDLIMTYVVMAAGSGIAMAVF…
