# Supplementary material for: The genome of the Hi5 germ cell line from Trichoplusia ni, an agricultural pest and novel model for small RNA biology
Source: eLife journal article supplement (doi:10.7554/elife.31628), 2018-01-29
Supplement: supp [file elife-31628-supp-v1.zip › elife_poa_e31628_Supplementary_File_8.xlsx]

## Sheet: Sheet1
Genes in the juvenile hormone biosynthesis and degradation pathways
Function	Gene name	Accession number in B. mori	Gene ID in T. ni	Manaul curation	BLASTp e-value	BLASTp bit score
Biosynthesis	Acetoacetyl-CoA thiolase (AACT)	NP_001093296.1	TNI008552	Yes	0	686
	HMG-CoA synthase (HMGS)	NP_001093297.1	TNI001488	Yes	0	823
	HMG-CoA reductase (HMGR)	NP_001093298.1	TNI014096	Yes	0	1543
			TNI016986	Yes	0	1479
	Mevalonate kinase (MevK)	NP_001093299.1	TNI013322	Yes	0	723
	Phosphomevalonate kinase (MevPK)	NP_001040145.1	TNI013457	Yes	7.17e-95	277
			TNI016750	Yes	3.6e-61	189
	Diphosphomevalonate decarboxylase (MevPPD)	NP_001093300.1	TNI001066	Yes	0	577
	IPP isomerase (IPPI)	NP_001040323.2	TNI016827	Yes	1.13e-161	451
			TNI014854	Yes	1.64e-161	451
			TNI015096	Yes	6.95e-66	205
			TNI016826	Yes	7.33e-66	205
			TNI015094	Yes	1.24e-60	189
			TNI017651**	Yes	2.84e-34	120
	Farnesyl PP synthase (FPPS) (Farnesyl diphosphate synthase)	BAF62113.1	TNI001400	Yes	0	727
		NP_001093301.1	TNI001398	Yes	4.21e-82	258
		NP_001093302.1	TNI001396	Yes	5.68e-70	227
			TNI001399	Yes	8.69e-69	222
			TNI001397	Yes	1.76e-48	176
	Farnesyl-PP pyrophosphatase	NA*	NA
	Farnesol dehydrogenase	XP_004927557.2*	TNI013207	Yes	6.91e-101	297
	Farnesal dehydrogenase	NA*	NA
	Epoxidase (CYP15C1)	BAH47266.1	TNI000677	Yes	0	537
	Juvenile hormone acid methyltransferase (JHAMT, O-Methyltransferase)	NP_001036901.1	TNI007926***	Yes	2.01e-119	347
Degradation	JH epoxide hydrolase (JHEH)	NP_001037201.1	TNI011757	Yes	0	646
			TNI011758	Yes	4.14e-155	478
			TNI008775	Yes	2.61e-131	390
			TNI009971	Yes	8.56e-126	377
			TNI010048	Yes	1.91e-40	143
	JH diol kinase (JHDK)	NP_001037080.1	TNI004463	Yes	3.08e-49	160
	JH esterase	AAR37335.1	TNI015079	Yes	1.06e-176	554
*Farnesyl-PP pyrophosphatase, Farnesol dehydrogenase and Farnesal dehydrogenase are putative enzymes. Farnesol dehydrogenase was predicted in the B. mori genome, whereas the other two are not annotated in the B. mori genome.
**Two gene models (TNI017651, TNI017652) were merged by manual curation.
***Two gene models (TNI007926, TNI007927) were merged.
