# Supplementary material for: The genome of the Hi5 germ cell line from Trichoplusia ni, an agricultural pest and novel model for small RNA biology
Source: eLife journal article supplement (doi:10.7554/elife.31628), 2018-01-29
Supplement: supp [file elife-31628-supp-v1.zip › elife_poa_e31628_Supplementary_File_9.pdf]

**Supplementary File 9. Primers and sequences.**

| Primer                | Sequence                                                                            | Description                                             |
|-----------------------|-------------------------------------------------------------------------------------|---------------------------------------------------------|
| <b>tracr RNA Core</b> | GTTTTAGAGCTAGAAATAGCAAGTTAAAATA<br>AGGCTAGTCCGTTATCAACTTGAAAAAGT<br>GCACCGAGTCGGTGC | Used as template<br>for sgRNA in vitro<br>transcription |

***ciwi* deletion**

|                                 |                                                         |            |
|---------------------------------|---------------------------------------------------------|------------|
| sgRNA1                          | CATTTTGTGTTTCTCAACAC <b>TGG</b>                         | <b>PAM</b> |
| sgRNA2                          | GGTACGGTGAGAAGCTCTAC <b>CGG</b>                         | <b>PAM</b> |
| T7-sgRNA1<br>forward primer     | CtaatacgactcactataGGCATTGTGTTTCTC<br>AACACgttttagagct   |            |
| T7-sgRNA2<br>forward primer     | CtaatacgactcactataGGGGTACGGTGAGAAG<br>CTCTACgttttagagct |            |
| <i>ciwi</i> deletion<br>forward | GCTATTTACCTACACAAACCAATTT                               |            |
| <i>ciwi</i> Deletion<br>reverse | ACCACGACGTGATCCA                                        |            |
| sgRNA reverse<br>primer         | GCACCGACTCGGTGCCACT                                     |            |

**mCherry-*ciwi* knockout**

|                             |                                                         |            |
|-----------------------------|---------------------------------------------------------|------------|
| sgRNA5                      | ATGCTGCAGCTCCGGCGCGT <b>AGG</b>                         | <b>PAM</b> |
| sgRNA6                      | TTTTCAATAACCCAAACAT <b>TGG</b>                          | <b>PAM</b> |
| T7-sgRNA5<br>forward primer | CtaatacgactcactataGGATGCTGCAGCTCCG<br>GCGCGTgttttagagct |            |
| T7-sgRNA6<br>forward primer | CtaatacgactcactataGGTTTTCAATAACCCAA<br>ACATAgtttagagct  |            |

***vasa* HDR**

|                             |                                                          |            |
|-----------------------------|----------------------------------------------------------|------------|
| sgRNA3                      | GCTCAGTAGTAATAGATTT <b>TGG</b>                           | <b>PAM</b> |
| sgRNA4                      | GGATGATGGTGTCCGTGATG <b>TGG</b>                          | <b>PAM</b> |
| T7-sgRNA3<br>forward primer | CtaatacgactcactataGGGCTCAGTAGTAATA<br>GATTTAgtttagagct   |            |
| T7-sgRNA4<br>forward primer | CtaatacgactcactataGGGGATGATGGTGTGCG<br>GTGATGgttttagagct |            |
| sgRNA reverse<br>primer     | GCACCGACTCGGTGCCACT                                      |            |

***vasa* donor amplification**

|                              |                               |  |
|------------------------------|-------------------------------|--|
| <i>vasa</i> donor<br>forward | /Biotin/CGAATCGAAATCTAAGGCAAG |  |
| <i>vasa</i> donor<br>reverse | ATCTTTGGTGTGAGCTCAAGC         |  |

**Primer****Sequence****Description****Primers to detect *vasa* HDR**

|                        |                          |  |
|------------------------|--------------------------|--|
| <i>vasa</i> HR forward | TGACTTGTGAATCCTTGGTTAC   |  |
| <i>vasa</i> HR reverse | CATTTTCATAATCCCTTGGTTCTC |  |
| GFP-HA-Vasa<br>N'-Fw   | GCGATAAATTGTTGGAAAC      |  |
| GFP-HA-Vasa<br>N'-Rv   | TCATCCATCCCGCTAC         |  |
| GFP-HA-Vasa<br>C'-Fw   | GTTTAGAAACATGgtgagcaagg  |  |
| GFP-HA-Vasa<br>C'-Rv   | CATTTTCATAATCCCTTGGTTCTC |  |

**Primers for Colony PCR**

|              |                   |  |
|--------------|-------------------|--|
| M13 (-20) Fw | GTAAAACGACGGCCAG  |  |
| M13 Rv       | CAGGAAACAGCTATGAC |  |

## vasa genomic sequence

Exon, start codon, sgRNA, PAM

CCGATTCCATTTTCCATTATCTTCTTCCGCCATTGCTAGCGTTATTGGCGGC  
TGCTGTCTTTGTTCTATGTGACGCTGTTACATTTATAAATACTACGCAAATA  
CTTCATATAAATTTCAAAGAAGGTAAGATTTCAAATAGTTATTGTTACTGAA  
CAAATATTTACTGGAATGCGCATATTTGCTCTAAACACGTGCAAATAGTTGA  
CAAATGCCGGTGCCGGTTGTAGCAAATTTTCAAATTTTGTGACTGAAAGTT  
TTTTTCTGCGATAAATTGTTGGAAACAAATTTATTTGGTCTATATTTTCCTTT  
ATTCATTTGTACTAATATCGAATCGAAATCTAAGGCAAGTTTCAAACCACTTA  
GGTGGGTAGGTATTCTGTTTCATGTAGGTAGATAAACTTTTCAATTATTAGCC  
TGTAACAACTATTGATTGTGTTTATGTTGAAAGATTTATTATGTTTATTATTGAC  
TTAGTTGCATTTTCGTAATTCTTGTTAGTTTCTAGTTACCTGCACCATTTTGT  
GATGGCATGGCTGCTTGTAGGTACCTATTACTTTTTGTTACCAAGTGATTTTC  
GGTTAAGTTTGGTGGTTTCGATTAAATAAATTACTTTTTAGGTTTTTTAGTTG  
ACTGTAATGTTTTTGTCTATTGTGTTATTTCAATTTTGATGGATAGGAAAATGTA  
GATAACATACTCATACACAAACAAGATCAAATGCTATGAAATACAAGTTTAAT  
AAGTATTGATACTGATTAATAATTGTAGAAGTTGTATAAGTCTCTTAAAAAACT  
GTTATGAATTATTCTTAGCTCATAACGTTAAGTTACTATACATGTGAAAAGGA  
TCACCTCTGTAGAGCAAAGTGTGACTTGTGAATCCTTGGTTACTTAGATAGA  
GTATCTTTCAAATTAATTGTTCTTTAATATGCTATAAAAAAGGAAATATAGGTA  
GGAAATTAGGAATGTCAATATTCATGTTAGTCGCCCCAAATTCAGCTAAATTT  
TGTAATAGATTTTATACACAGTAGCGAACCATTTTGCTGAGCTAAGTCCA  
GTAGCCATTAATCTATTACTACTGAGCATTATTATACATTTTATTTTTCTGTTT  
AGAAACATGGATGATGATTGGGATGATGGTGTCTGGTGATGTGTAAGTATT  
TAGCGTATAGTCATATTCAAATTTTAGGGTTTTAAATGGTATATGGCCAATT  
GAGCTGACTTGTTGCTATTAACACCTGAGGAATAAATGTATGTCAACAACAA  
TGAGAATTATTGTTTATACATTTATGATAATGCTTATTAGTATCCAATGGTGCT  
GCTAAACCCAAGATGAGTGACAATTCTGCTCATCATCACATGCTCTTAGTAC  
CATAATGAATCAAAAATAATAATAGCCTAGTTTACTTACAGTATCATCTAGAG  
AATTAATCTAATTGCATTTGTATAATTTGAATAATGTCTTAGTTAAATGCA  
CAAGATTTTGGGCTCTAGTGATGTACATGATACTTGTAGCTTTTGACAAAA  
GATAGAATAACTTTTATTTTTTAGGTAGTACAATCTCCTGCACTTAACAACCTA  
CGACTCAAATGTTGATCAAGGGCACAGTCTTTCGAGAGGAAGAGGATTCCA  
GTCATTTGATGAAAATGGTAATAATTAATTTGCAAGTCCTGATAATCTGACTT  
ATCACTTCTCCCATTTTTTATTGCTGTATTTAGTACTAATAAAATTGCAACATA  
ACAAAACCTGAACTTAGCTAACTCATTTTTTCAAGGTATCAGCATTCTTGACT  
ACAACACTTCATACACTTATGGCTTTACCACTTAAGTGTTACAAATGAGCCTT  
GTTGGTTATACACAGCTTGAGCTCACACCAAAGATATCATGTTACTACTTATA

ATTATAAGTTCTAAGGTCTGCATGTTTCATGTTTAGATTATGAAGTGGATAAGG  
GCAGCAACGGTTTTGGAGAGAGGCGCGGGCGCGGGCGGTAGAGGCGGGCG  
GGGAGGAGGCCGTGGGTTCCGTAATGGTGGAACAGGTAGCAGAGAACCAA  
GGGATTATGAAAATG

## ssDNA donor sequence

Inserted sequence, mutated nucleotide

CGAATCGAAATCTAAGGCAAGTTTCAAACCACTTAGGTGGGTAGGTATTCTG  
TTTCATGTAGGTAGATAAACTTTTCAATTATTAGCCTGTACAACTATTGATTGT  
GTTTATGTTGAAAGATTTATTATGTTTATTATTGACTTAGTTGCATTTTCGTAA  
TTCTTGTTAGTTTCTAGTTACCTGCACCATTTTGTGATGGCATGGCTGCTTG  
TAGGTACCTATTACTTTTTGTTACCAAGTGATTTTCGGTTAAGTTTGGTGGTT  
TCGATTAAAATAAATTACTTTTTAGGTTTTTTAGTTGACTGTAATGTTTTTGCT  
ATTGTGTTATTTCAATTTTGATGGATAGGAAAATGTAGATAACATACTCATAC  
ACAAACAAGATCAAATGCTATGAAATACAAGTTTAATAAGTATTGATACTGAT  
TAAAATTGTAGAAGTTGTATAAGTCTCTTAAAAAACTGTTATGAATTATTCTTA  
GCTCATAACGTTAAGTTACTATACATGTGAAAAGGATCACCTCTGTAGAGCA  
AAGTGTGACTTGTGAATCCTTGGTTACTTAGATAGAGTATCTTTCAAATTAAT  
TGTTCTTTAATATGCTATAAAAAAGGAAATATAGGTAGGAAATTAGGAATGTC  
AATATTCATGTTAGTCGCCCAAATTCAGCTAAATTTTGTAATAGATTTTATA  
CAACAGTAGCGAACAAATTTTGTCTGAGCTAAGTCCAGTAGCAATAAATCTATT  
ACTACTGAGCATTATTATACATTTTATTTTCTGTTTAGAAACatggtgagcaaggg  
cgaggagctgttcaccggggtggtgccatcctggtcgagctggacggcgacgtaaacggccacaagttcag  
cgtgtccggcgagggcgagggcgatgccacctacggcaagctgaccctgaagttcatctgcaccaccggcaa  
gctgccgtgccctggccaccctcgtgaccaccctgacctacggcgtgcagtgttcagccgctaccccgacc  
acatgaagcagcagcacttctcaagtccgccatgccgaaggctacgtccaggagcgcaccatcttctcaag  
gacgacggcaactacaagaccgcgcgaggtgaagttcgagggcgacaccctggtgaaccgcatcgagc  
tgaagggcatcgactcaaggaggacggcaacatcctggggcacaagctggagtacaactacaacagccac  
aacgtctatatcatggccgacaagcagaagaacggcatcaaggtgaactcaagatccgccacaacatcgag  
gacggcagcgtgcagctcgccgaccactaccagcagaacacccccatcgggcgacggccccgtgctgtgcc  
cgacaaccactacctgagcaccagtcgccctgagcaaagaccccaacgagaagcgcgatcacatggtcc  
tgctggagttcgtgaccgcccgggatcactctcggcattggacgagctgtacaagggtagtagcggaTACC  
CATACGATGTTCCAGATTACGCTggtagtagcggaagtagcgggATGGATGATGATT  
GGGATGATGGTGTCTGGTGTGTAGTAAGTATTTAGCGTATAGTCATATTCAA  
AATTTTAGAGTTTTAAATGGTATATGGCCAATTGAGCTGACTTGTTGCTATTA  
ACACCTGAGGAATAAATGTATGTCAACAACAATGAGAATTATTGTTTATACAT  
TTATGATAATGCTTATTAGTATCCAATGGTGCTGCTAAACCCAAGATGAGTG  
ACAATTCTGCTCATCATCATGCTCTTAGTACCATAATGAATCAAAAATAAT

AATAGCCTAGTTTACTTACAGTATCATCTAGAGAATTA AAAATCTAATTGCATT  
TGTATAATTTGAATAATGTCTTAGTTAAAATGCACAAGATTTTTGGGCTCTAG  
TGATGTACATGATACTTGTTAGCTTTTGACAAAAGATAGAATAACTTTTTATTTT  
TTAGGTAGTACAATCTCCTGCACTTAACAAC TACGACTCAAATGTTGATCAA  
GGGCACAGTCTTTTCGAGAGGAAGAGGATTCCAGTCATTTGATGAAAATGGT  
AATAATTAATTTGCAAGTCCTGATAATCTGACTTATCACTTCTCCCATTTTTTA  
TTGCTGTATTTAGTACTAATAAAATTGCAACATAACAAA ACTTGAACTTAGC  
TAACTCATTTTTCAAGGTATCAGCATTCTTGACTACAACACTTCATACACTTA  
TGGCTTTACCACTTAAGTGTTACAAATGAGCCTTGTTGGTTATACACAGCTT  
GAGCTCACACCAAAGAT

### Plasmid template for generating ssDNA donor

Primer binding site, **Inserted sequence**, **Mutated PAM**, Plasmid backbone

CGAATCGAAATCTAAGGCAAGTTTCAAACCACTTAGGTGGGTAGGTATTCTG  
TTTCATGTAGGTAGATAAACTTTTCAATTATTAGCCTGTACA ACTATTGATTGT  
GTTTATGTTGAAAGATTTATTATGTTTATTATTGACTTAGTTGCATTTTCGTAA  
TTCTTGTTAGTTTCTAGTTACCTGCACCATTTTGTTGATGGCATGGCTGCTTG  
TAGGTACCTATTACTTTTTGTTACCAAGTGATTTTCGGTTAAGTTTGGTGGTT  
TCGATTAAAATAAATTACTTTTTAGGTTTTTTAGTTGACTGTAATGTTTTTGCT  
ATTGTGTTATTTCAATTTTGATGGATAGGAAAATGTAGATAACATACTCATAC  
ACAAACAAGATCAAATGCTATGAAATACAAGTTTAATAAGTATTGATACTGAT  
TAAAATTGTAGAAGTTGTATAAGTCTCTTAAAAAACTGTTATGAATTATTCTTA  
GCTCATAACGTTAAGTTACTATACATGTGAAAAGGATCACCTCTGTAGAGCA  
AAGTGTGACTTGTGAATCCTTGGTTACTTAGATAGAGTATCTTTCAAATTAAT  
TGTTCTTTAATATGCTATAAAAAAGGAAATATAGGTAGGAAATTAGGAATGTC  
AATATTCATGTTAGTCGCCCCAAATTCAGCTAAATTTTGTAATAGATTTTATA  
CAACAGTAGCGAAC**a**ATTTTGCTGAGCTAAGTCCAGTAGC**a**ATAAATCTATTA  
CTACTGAGCATTATTATACATTTTATTTTCTGTTTAGAAAC**ATGgtgagcaaggg**  
**cgaggagctgtcaccggggtggtgcccacctggtcgagctggacggcgacgtaaacggccacaagttcag**  
**cgtgtccggcgagggcgagggcgatgccacctacggcaagctgacctgaagttcatctgcaccaccggcaa**  
**gctgcccgtgccctggcccaccctcgtgaccaccctgacctacggcgtgcagtgttcagccgctaccccgacc**  
**acatgaagcagcagcacttctcaagtccgccatgcccgaaggctacgtccaggagcgcaccatcttctcaag**  
**gacgacggcaactacaagacccgcgcgaggtgaagttcgagggcgacacctggtgaaccgcatcgagc**  
**tgaagggcatcgacttcaaggaggacggcaacatcctggggcacaagctggagtacaactacaacagccac**  
**aacgtctatatcatggccgacaagcagaagaacggcatcaaggtgaacttcaagatccgccacaacatcgag**  
**gacggcagcgtgcagctcgccgaccactaccagcagaacacccccatcggcgacggccccgtgctgctgcc**  
**cgacaaccactacctgagcaccacgtccgccctgagcaaagaccccaacgagaagcgcgatcacatggtcc**  
**tgctggagttcgtgaccgccgcccgggatcactctcggcgtggacgagctgtacaagggtagtagcggaTACC**

CATACGATGTTCCAGATTACGCTggtagtagcggaagtagcgggATGGATGATGATT  
GGGATGATGGTGTCTGGTATGTaGTAAGTATTTAGCGTATAGTCATATTCAA  
AATTTTAGaGTTTTAAATGGTATATGGCCAATTGAGCTGACTTGTTGCTATTA  
ACACCTGAGGAATAAATGTATGTCAACAACAATGAGAATTATTGTTTATACAT  
TTATGATAATGCTTATTAGTATCCAATGGTGTCTGCTAAACCCAAGATGAGTG  
ACAATTCTGCTCATCATCACATGCTCTTAGTACCATAATGAATCAAAAATAAT  
AATAGCCTAGTTTACTTACAGTATCATCTAGAGAATTAAAATCTAATTGCATT  
TGTATAATTTGAATAATGTCTTAGTTAAAATGCACAAGATTTTTGGGCTCTAG  
TGATGTACATGATACTTGTTAGCTTTTGACAAAAGATAGAATAACTTTTTATTTT  
TTAGGTAGTACAATCTCCTGCACTTAACAACCTACGACTCAAATGTTGATCAA  
GGGCACAGTCTTTCGAGAGGAAGAGGATTCCAGTCATTTGATGAAAATGGT  
AATAATTAATTTGCAAGTCCTGATAATCTGACTTATCACTTCTCCCATTTTTTA  
TTGCTGTATTTAGTACTAATAAAATTGCAACATAACAAAACCTTGAACTTAGC  
TAACTCATTTTTCAAGGTATCAGCATTCTTGACTACAACACTTCATACACTTA  
TGGCTTTACCACTTAAGTGTTACAAATGAGCCTTGTTGGTTATACACAGCTT  
GAGCTCACACCAAAGATATCATGTTACTACTTATAATTATAAGTTCTAATGCA  
GATATCCATCACACTGGCGGCCGCTCGAGCATGCATCTAGAGGGCCCAATT  
CGCCCTATAGTGAGTCGTATTACAATCACTGGCCGTCGTTTTACAACGTCG  
TACTGGGAAAACCCTGGCGTTACCCAACCTAATCGCCTTGCAGCACATCC  
CCCTTTCGCCAGCTGGCGTAATAGCGAAGAGGCCCGCACCGATCGCCCTT  
CCCAACAGTTGCGCAGCCTATACGTACGGCAGTTTAAGGTTTACACCTATAA  
AAGAGAGAGCCGTTATCGTCTGTTTGTGGATGTACAGAGTGATATTATTGAC  
ACGCCGGGGCGACGGATGGTGTATCCCCCTGGCCAGTGACAGTCTGCTGTC  
AGATAAAGTCTCCCGTGAACTTTACCCGGTGGTGCATATCGGGGATGAAAG  
CTGGCGCATGATGACCACCGATATGGCCAGTGTGCCGGTCTCCGTTATCGG  
GGAAGAAGTGGCTGATCTCAGCCACCGCGAAAATGACATCAAAAACGCCAT  
TAACCTGATGTTCTGGGGAATATAAATGTCAGGCATGAGATTATCAAAAAGG  
ATCTTCACCTAGATCCTTTTACGTAGAAAGCCAGTCCGCAGAAACGGTGCT  
GACCCCGGATGAATGTCAGCTACTGGGCTATCTGGACAAGGGAAAACGCAA  
GCGCAAAGAGAAAGCAGGTAGCTTGCAAGTGGGCTTACATGGCGATAGCTA  
GACTGGGCGGTTTTATGGACAGCAAGCGAACCAGGAATTGCCAGCTGGGGC  
GCCCTCTGGTAAGGTTGGGAAGCCCTGCAAAGTAACTGGATGGCTTTCTC  
GCCGCCAAGGATCTGATGGCGCAGGGGATCAAGCTCTGATCAAGAGACAG  
GATGAGGATCGTTTCGCATGATTGAACAAGATGGATTGCACGCAGGTTCTC  
CGGCCGCTTGGGTGGAGAGGCTATTCGGCTATGACTGGGCACAACAGACA  
ATCGGCTGCTCTGATGCCGCCGTGTTCCGGCTGTCAGCGCAGGGGGCGCCC  
GGTTCTTTTTGTCAAGACCGACCTGTCCGGTGCCCTGAATGAACTGCAAGA  
CGAGGCAGCGCGGCTATCGTGGCTGGCCACGACGGGCGTTTCTTGCGCAG  
CTGTGCTCGACGTTGTCAGTGAAGCGGGAAGGGACTGGCTGCTATTGGGC  
GAAGTGCCGGGGCAGGATCTCCTGTCATCTCACCTTGCTCCTGCCGAGAAA

GTATCCATCATGGCTGATGCAATGCGGCGGCTGCATACGCTTGATCCGGCT  
ACCTGCCCATTTCGACCACCAAGCGAAACATCGCATCGAGCGAGCACGTACT  
CGGATGGAAGCCGGTCTTGTCGATCAGGATGATCTGGACGAAGAGCATCA  
GGGGCTCGCGCCAGCCGAAGTGTTCGCCAGGCTCAAGGCGAGCATGCCC  
GACGGCGAGGATCTCGTCGTGACCCATGGCGATGCCTGCTTGCCGAATATC  
ATGGTGGAAAATGGCCGCTTTTCTGGATTTCATCGACTGTGGCCGGCTGGGT  
GTGGCGGACCGCTATCAGGACATAGCGTTGGCTACCCGTGATATTGCTGAA  
GAGCTTGGCGGCGAATGGGCTGACCGCTTCCTCGTGCTTTACGGTATCGCC  
GCTCCCGATTTCGACGCGCATCGCCTTCTATCGCCTTCTTGACGAGTTCTTCT  
GAATTATTAACGCTTACAATTTCTGATGCGGTATTTTCTCCTTACGCATCTG  
TGCGGTATTTACACCGCATAACAGGTGGCACTTTTTCGGGGAAATGTGCGCG  
GAACCCCTATTTGTTTATTTTTCTAAATACATTCAAATATGTATCCGCTCATGA  
GACAATAACCCTGATAAATGCTTCAATAATAGCACGTGAGGAGGGCCACCA  
TGGCCAAGTTGACCAGTGCCGTTCCGGTGCTCACCGCGCGCGACGTGCGC  
GGAGCGGTTCGAGTTCTGGACCGACCGGCTCGGGTTCTCCCGGGACTTCGT  
GGAGGACGACTTCGCCGGTGTGGTCCGGGACGACGTGACCCTGTTTCATCA  
GCGCGGTCCAGGACCAGGTGGTGCCGGACAACACCCTGGCCTGGGTGTG  
GGTGCGCGGCCTGGACGAGCTGTACGCCGAGTGGTCGGAGGTCTGTGTCCA  
CGAACTTCCGGGACGCCTCCGGGGCCGGCCATGACCGAGATCGGCGAGCA  
GCCGTGGGGGCGGGAGTTCGCCCTGCGCGACCCGGCCGGCAACTGCGTG  
CACTTCGTGGCCGAGGAGCAGGACTGACACGTGCTAAAACTTCATTTTTAAT  
TTAAAAGGATCTAGGTGAAGATCCTTTTTTGATAATCTCATGACCAAAATCCCT  
TAACGTGAGTTTTTCGTTCCACTGAGCGTCAGACCCCGTAGAAAAGATCAAA  
GGATCTTCTTGAGATCCTTTTTTTCTGCGCGTAATCTGCTGCTTGCAAACAAA  
AAAACCACCGCTACCAGCGGTGGTTTGTTTGCCGGATCAAGAGCTACCAAC  
TCTTTTTCCGAAGGTAAGTGGCTTCAGCAGAGCGCAGATACCAAATACTGTC  
CTTCTAGTGTAGCCGTAGTTAGGCCACCACTTCAAGAACTCTGTAGCACCG  
CCTACATACCTCGCTCTGCTAATCCTGTTACCAGTGGCTGCTGCCAGTGGC  
GATAAGTCGTGTCTTACCGGGTTGGAAGTCAAGACGATAGTTACCGGATAAG  
GCGCAGCGGTCTGGGCTGAACGGGGGGTTCGTGCACACAGCCCAGCTTGG  
AGCGAACGACCTACACCGAACTGAGATACCTACAGCGTGAGCTATGAGAAA  
GCGCCACGCTTCCCGAAGGGAGAAAGGCGGACAGGTATCCGGTAAGCGGC  
AGGGTCGGAACAGGAGAGCGCACGAGGGAGCTTCCAGGGGGAAACGCCT  
GGTATCTTTATAGTCCTGTGCGGTTTCGCCACCTCTGACTTGAGCGTCGATT  
TTTGTGATGCTCGTCAGGGGGGCGGAGCCTATGGAAAAACGCCAGCAACG  
CGGCCTTTTTACGGTTCCTGGGCTTTTGCTGGCCTTTTGCTCACATGTTCTT  
TCCTGCGTTATCCCCTGATTCTGTGGATAACCGTATTACCGCCTTTGAGTGA  
GCTGATACCGCTCGCCGCAGCCGAACGACCGAGCGCAGCGAGTCAGTGAG  
CGAGGAAGCGGAAGAGCGCCCAATACGCAAACCGCCTCTCCCCGCGCGTT  
GGCCGATTCATTAATGCAGCTGGCACGACAGGTTTCCCGACTGGAAAGCGG

GCAGTGAGCGCAACGCAATTAATGTGAGTTAGCTCACTCATTAGGCACCCC  
AGGCTTTACACTTTATGCTTCCGGCTCGTATGTTGTGTGGAATTGTGAGCGG  
ATAACAATTTACACAGGAAACAGCTATGACCATGATTACGCCAAGCTATTT  
AGGTGACACTATAGAATACTCAAGCTATGCATCAAGCTTGGTACCGAGCTC  
GGATCCACTAGTAACGGCCGCCAGTGTGCTGGAATTCGCC

### Hi5 *ciwi* genomic sequence

Exon, sgRNA for *ciwi* deletion, sgRNA for mCheery-*ciwi* knockout PAM

GCTATTTACCTACACAAACCAATTTAAATATATGAACCGAACACTCATTGAT  
GTTGCCAAGTTAAAATCAAAAATCAATGGGCATTAACAACCAGAAAGTTTATT  
GCGTAAAATGATTATTTTTTCATTACAATTTATTTCTGATCGAACACAAAAGAT  
CAGGGAGATTATTCAAGTAGTTAAAAAGGTAAATAGCCTAATTAGTAATAAAT  
GGCATAACGCGTTCCAGAAAAAGTGAATATTTTCACATTTGATTTATAACATT  
GCAACATTATTCTGTTATTTTTTTTATCGATATTTACTCACAACAAAATCAACAA  
ATTATCGACATGTAAACATTCGGCTATAGCAATAGGGTAACACAGCTCTAGGA  
CTTCTCTTTTTTCTGTTTGCGCGTGCGTACAACGCACGTAGATTTGCTGTTT  
GACTTGTGATAATAATTAAGTTTTGTTTTGCTTATTCTAAGCCGGTAACCTTA  
CAATTTCTAGATTAAGTAACTAAGGTAAGTTACTTTTCGTTGTTATTATAATA  
ACTCAGATTGGTATTCTCAGGTCCTCACAGGGTCGCCATTTTTTCATTCTTAAT  
ATTTTGGCGTATAAACTGACCCACTGAAGAAAAAACAGATACCTACTTGAA  
TATGATGATAACATATTAATTATAACGGTGAGCTTGATACAGCATCTTGATT  
CTATATTTGTTTTATTTCAGAATTAAGGAAAGAAACAGGTACCTAGGTATCTCA  
ATCGTGTTCAATTTTTGTATAAGTATAAATATTGTTTTATAGTATATACCTATCT  
AAAACCTCACATAATATTATCCTTAATTATCTCAAAAGAGATTTGATATTGAAAT  
ACGACGTATATAAGATACATTCTTGGTTTACCTATCTTATTGTTTTGCTTCATA  
TATAATAAAATTCTACCTCCATTTTTTTTTGTTAAGTCTTGTGTTTCGAAGAATT  
CCTTCTAGCGGTTGATGTATCAAATTTTCGTATAGTGTGCAAATTTTTTAGTAC  
CTACGTAGTCTAGTTATTACAATACGCGACTAAATACTCGGTTTTTACATACA  
GCACATACTAATAATATGTGAAAGTGATCTAAATACTCAAAGCTGGATGGC  
CTTAAACAAGATTGACCTTGAAAAACCCTCGCGGTTGTCTCAGTCCCGTTTT  
CGTGGAATACACCTTTTTTTTTTAAATATTCATTTCGTATTCCATACAAAGTCTCT  
CAATTTCCGTTACGAAATTGAAAACATAATTTAGATAAGAAATGAAGCGTTTC  
TTAATGTAATACATACAAGTTGCAACATGTCTATGTTGTGAACAGCCTGTGAT  
ATTATACTGATACTCTATCAACTCAAATTTCTTTACTTGTTATTGGGACTGATA  
ATGAACAAAAATGTGGTTAGTGTTCTGGAGTTTCATGAGACACAGATACTTA  
AATAGAATAAACAAACAAACAGTTTTCCATTGTTTTGTCCAGTGTGAGAAAC  
ACAAAATGGAATGTAATGACAGTACCTCATTTAATACTGAATCAGGCTCAC  
TATAATTACTATAAAAAGGTCCAGTATAATAAGAAATTGCAGCAAGTTTTGG

AAATATAGCTTTTTGTCAGACAGTAATGCCTTAGTAAATGGGTACCATTTTTG  
 GGCTAGGAACCCTAAGAAATCAATCATTTTAATGGTACGCTAAACAATGATC  
 ACTGGACTATTCATATTACATTTACTCTACTAAAGTGCATTTCTAGAAATGTG  
 AAATAAAGCTTCCTTATTTTCATTGCATGAAACACCAGTTTATCTTATTATTGTA  
 TAGTTGTGTTTCATTTGTGTTTTAAAAAATCATCATACTGCGCACACTAGTTGT  
 TTTTTTACTGTTAAAACCAGACACTAATAAACATTAGTCTGTTCAAAGCCACA  
 TTTCAATTTTAACATTTCTCTTGTGATCTTAAAATAAATAAATGAACATCTGAT  
 ATATTTGTTTTGGTTTTTTTTTAGTGAAGTGACACAATAAGATTGTTTATCTTT  
 TCTAACAGCATGTAAAATTAGTAACAAAAAAGTTATATGAGCATCCATTATGA  
 ATAGTTAACCTAGTCCATATGTTTGGGTTATTGAAAACATTTTAAAGCTTATTA  
 AATTTATCATTTAGATGTCCGAACGCGGACGTGGACGAGCCCGAGGGCTAG  
 CAGGTAGAGGGGGGCGATAATGCTGCAGCTCCGGCGCGTAGCCTGGGGA  
 ACGACCCCAAGGCCACCACAACAACAAGGTCCTGTGGGGCCCCGTC  
 CTCAGCCACCTTCGGCATGGGCACCACCCACTGTTGCCCTCCGGTCAGA  
 GCTGGGGTGCCAACGCCAAGTGTGCAAGCCGCTAGAGCTTCTCACCGTAC  
 CACGCCTACCACCCATCAAGATCATCCTGGGGATGTTGATGTTCAACAGAG  
 GATGCAGGCAATGCAAATTGGTTAGTGATCTTAATTGTAACAATGAATTCAAT  
 TATTTCCGCTTTATTCCGATTTAACTCATGAAACAACCGTTTCGATCAGGACA  
 AGCCCAAGCCGGTGCTAGTGCGCATCCAGGTTCTGTCAGTGATTGGTCGTG  
 GATCACGTCGTGGT

### ***mCherry-ciwi* knockout plasmid donor sequence**

sequence inserted, mutated PAM, stop codon, plasmid backbone

CTATCAACTCAAATTCTTTACTTGTTATTGGGACTGATAATGAACAAAAATG  
 TGGTTAGTGTTCTGGAGTTTCATGAGACACAGATACTTAAATAGAATAAACA  
 AACAAACAGTTTTCCATTGTTTTGTCCAGTGTTGAGAAACACAAAATGGAAAT  
 GTAATGACAGTACCTCATTTAATACTGAATCAGGCTCACTATAATTACTATAA  
 AAAGGTCCAGTATAATAAAGAAATTGCAGCAAGTTTTGGAAATATAGCTTTTT  
 GTCAGACAGTAATGCCTTAGTAAATGGGTACCATTTTTGGGCTAGGAACCCT  
 AAGAAATCAATCATTTTAATGGTACGCTAAACAATGATCACTGGACTATTCAT  
 ATTACATTTACTCTACTAAAGTGCATTTCTAGAAATGTGAAATAAAGCTTCCT  
 TATTTCAATTGCATGAAACACCAGTTTATCTTATTATTGTATAGTTGTGTTCA  
 TGTGTTTTAAAAAATCATCATACTGCGCACACTAGTTGTTTTTTTACTGTTAAA  
 ACCAGACACTAATAAACATTAGTCTGTTCAAAGCCACATTTCAATTTTAACAT  
 TTCTCTTGTGATCTTAAAATAAATAAATGAACATCTGATATATTTGTTTTGGTT  
 TTTTTTTAGTGAAGTGACACAATAAGATTGTTTATCTTTCTAACAGCATGTAA  
 AATTAGTAACAAAAAAGTTATATGAGCATCCATTATGAATAGTTAACCTAGTC  
 AATATGTTTGGGTTATTGAAAACATTTTAAAGCTTATTAAATTTATCATTTAGA  
 TGGTGAGCAAGGGCGAGGAGGATAACTCCGCCATCATCAAGGAGTTCCTG

CGCTTCAAGGTGCACATGGAGGGCTCCGTGAACGGCCACGAGTTCGAGAT  
CGAGGGCGAGGGCGAGGGCCGCCCTACGAGGGCAGCCAGACCGCCAAG  
CTGAAGGTGACCAAGGGTGGCCCCCTGCCCTTCGCCTGGGACATCCTGTC  
CCCTCAGTTCATGTACGGCTCCAAGGCCTACGTGAAGCACCCCGCCGACAT  
CCCCGACTACTTGAAGCTGTCTTCCCCGAGGGCTTCAAGTGGGAGCGCGT  
GATGAACTTCGAGGACGGCGGCGTGGTGACCGTGACCCAGGACTCCTCTC  
TGCAGGACGGCGAGTTCATCTACAAGGTGAAGCTGCGCGGCACCAACTTC  
CCCTCCGACGGCCCCGTAATGCAGAAGAAGACCATGGGCTGGGAGGCCTC  
CTCCGAGCGGATGTACCCCGAGGACGGCGCCCTGAAGGGCGAGATCAAGC  
AGAGGCTGAAGCTGAAGGACGGCGGCCACTACGACGCTGAGGTCAAGACC  
ACCTACAAGGCCAAGAAGCCCGTGACGCTGCCCCGGCGCCTACAACGTCAA  
CATCAAGTTGGACATCACCTCCCACAACGAGGACTACACCATCGTGGAACA  
GTACGAACGCGCCGAGGGCCGCCACTCCACCGGCGGCATGGACGAGCTG  
TACAAGTAGTCTAGAATGAATCGTTTTTAAAATAACAAATCAATTGTTTTATAA  
TATTCGTACGATTCTTTGATTATGTAATAAAATGTGATCATTAGGAAGATTAC  
GAAAAATATAAAAAATATGAGTTCTGTGTGTATAACAAATGCTGTAAACGCCA  
CAATTGTGTTTGTTGCAAATAAACCCATGATTATTTGATTAAATTGTTGTTTT  
CTTTGTTCATAGACAATAGTGTGTTTTGCCTAAACGTGTACTGCATAAACTCC  
ATGCGAGTGTATAGCGAGCTAGTGGCTAACGCTTGCCCCACCAAAGTAGAT  
TCGTCAAAATCCTCAATTTATCACCTCCTCCAAGTTTAACATTTGGCCGTC  
GGAATTAACCTCTAAAGATGCCACATAATCTAATAAATGAAATAGAGATTCAA  
ACGTGGCGTCATCGTCCGTTTTCGACCATTTCCGAAAAGAACTCGGGCATAA  
ACTCTATGATTTCTCTGGACGTGGTGTTCGAAACTCTCAAAGTACGCAGT  
CAGGAACGTGCGCGACATGTCGTGCGGAAACTCGCGCGGAAACATGTTGT  
TGTAACCGAACGGGTCCCATAGCGCCAAAACCAAATCTGCCAGCGTCAATA  
GAATGAGCACGATGCCGACAATGGAGCTGGCTTGGATAGCGATTTCGAGTTA  
ACGGCCGGCCCTCCGAACGCGGACGTGGACGAGCCCGAGGGCTAGCAGGT  
AGAGGGGGCGATAATGCTGCAGCTCCGGCGCGTAAGCCTGGGGAACGACC  
CCAAGGCCACCAACAACAACAAGGTCCTGTGGGGCCCCGTCCTCAGC  
CACCTTCGGCATGGGCACCACTGTTGCCCTCCGGTCAGAGCTGGG  
GTGCCAACGCCAACTGTGCAAGCCGGTAGAGCTTCTACCGTACCACGCCT  
ACCACCCATCAAGATCATCCTGGGGATGTTGATGTTCAACAGAGGATGCAG  
GCAATGCAAATTGGTTAGTGATCTTAATTGTAACAATGAATTCAATTATTTCC  
GCTTTATTCCGATTTAACTCATGAAACAACCGTTTCGATCAGGACAAGCCCA  
AGCCGGTGCTAGTGGCGATCCAGGTTTCGTGAGTATTGGTCGTGGATCACG  
TCGTGGTGGCGGCCGAGTGCTGCCTGAACAAATAACCGTTCTTAGGACTCG  
TCCTACTACTATCCAGTCTAAGAAAGGTAAGTCTTTGTTGTTTATTATCTACA  
TTATAAACTATTTACTACACGTAAATAGAACAATCTGTATATCCATCTAATTT  
AGTGTTGGAAGTTTTTATTATAAAATCTTAATTTTCTCATAGGTTTCATCGGGT  
ACAGTAATTGATTTGAAAGCCAACTACTTCACTGTGCAGACTACACCACAGT

GGTGCTTATACCAGTATCATGTAGATATTACTCCCGAAGAAGATAGCACCGC  
GGTTCGCAAAGGCTTGTTGCGTATTCACGCCAATACACTGGGAGGTGCAGA  
TATCCATCACACTGGCGGCCGCTCGAGCATGCATCTAGAGGGGCCCAATTG  
CCCTATAGTGAGTCGTATTACAATTCACTGGCCGTCGTTTTACAACGTCGTG  
ACTGGGAAAACCCTGGCGTTACCCAACCTAATCGCCTTGCAGCACATCCCC  
CTTTCGCCAGCTGGCGTAATAGCGAAGAGGCCCGCACCGATCGCCCTTCC  
CAACAGTTGCGCAGCCTATACGTACGGCAGTTTAAGGTTTACACCTATAAAA  
GAGAGAGCCGTTATCGTCTGTTTGTGGATGTACAGAGTGATATTATTGACAC  
GCCGGGGCGACGGATGGTGATCCCCCTGGCCAGTGACAGTCTGCTGTGAG  
ATAAAGTCTCCCGTGAACCTTACCCGGTGGTGATATCGGGGATGAAAGCT  
GGCGCATGATGACCACCGATATGGCCAGTGTGCCGGTCTCCGTTATCGGG  
GAAGAAGTGGCTGATCTCAGCCACCGCGAAAATGACATCAAAAACGCCATT  
AACCTGATGTTCTGGGGAATATAAATGTCAGGCATGAGATTATCAAAAAGGA  
TCTTCACCTAGATCCTTTTACGTAGAAAGCCAGTCCGCAGAAACGGTGCT  
GACCCCGGATGAATGTCAGCTACTGGGCTATCTGGACAAGGGGAAAACGCAA  
GCGCAAAGAGAAAGCAGGTAGCTTGCAGTGGGCTTACATGGCGATAGCTA  
GACTGGGCGGTTTTATGGACAGCAAGCGAACCAGGAATTGCCAGCTGGGGC  
GCCCTCTGGTAAGGTTGGGAAGCCCTGCAAAGTAACTGGATGGCTTTCTC  
GCCGCCAAGGATCTGATGGCGCAGGGGATCAAGCTCTGATCAAGAGACAG  
GATGAGGATCGTTTCGCATGATTGAACAAGATGGATTGCACGCAGGTTCTC  
CGGCCGCTTGGGTGGAGAGGCTATTCCGGCTATGACTGGGCACAACAGACA  
ATCGGCTGCTCTGATGCCGCCGTGTTCCGGCTGTCAGCGCAGGGGGCGCCC  
GGTTCTTTTTGTCAAGACCGACCTGTCCGGTGCCCTGAATGAACTGCAAGA  
CGAGGCAGCGCGGCTATCGTGGCTGGCCACGACGGGCGTTTCTTGCGCAG  
CTGTGCTCGACGTTGTCACTGAAGCGGGAAGGGACTGGCTGCTATTGGGC  
GAAGTGCCGGGGCAGGATCTCCTGTATCTCACCTTGCTCCTGCCGAGAAA  
GTATCCATCATGGCTGATGCAATGCGGCGGCTGCATACGCTTGATCCGGCT  
ACCTGCCCATTGACACCAAGCGAAACATCGCATCGAGCGAGCACGTACT  
CGGATGGAAGCCGGTCTTGTCGATCAGGATGATCTGGACGAAGAGCATCA  
GGGGCTCGCGCCAGCCGAACCTGTTCCGCCAGGCTCAAGGCGAGCATGCCC  
GACGGCGAGGATCTCGTCGTGACCCATGGCGATGCCTGCTTGCCGAATATC  
ATGGTGGAATAATGGCCGCTTTTCTGGATTTCATCGACTGTGGCCGGCTGGGT  
GTGGCGGACCGCTATCAGGACATAGCGTTGGCTACCCGTGATATTGCTGAA  
GAGCTTGGCGGCGAATGGGCTGACCGCTTCTCGTGCTTTACGGTATCGCC  
GCTCCCGATTGCGAGCGCATCGCCTTCTATCGCCTTCTTGACGAGTTCTTCT  
GAATTATTAACGCTTACAATTTCTGATGCGGTATTTTCTCCTTACGCATCTG  
TGCGGTATTTACACCGCATACAGGTGGCACTTTTCGGGGAAATGTGCGCG  
GAACCCCTATTTGTTTATTTTCTAAATACATTCAAATATGTATCCGCTCATGA  
GACAATAACCCTGATAAATGCTTCAATAATAGCACGTGAGGAGGGGCCACCA  
TGGCCAAGTTGACCAGTGCCGTTCCGGTGCTCACCGCGCGCGACGTCGCC

GGAGCGGTTCGAGTTCTGGACCGACCGGCTCGGGTTCTCCCGGGACTTCGT  
GGAGGACGACTTCGCCGGTGTGGTCCGGGACGACGTGACCCTGTTTCATCA  
GCGCGGTCCAGGACCAGGTGGTGCCGGACAACACCCTGGCCTGGGTGTG  
GGTGCGCGGCCTGGACGAGCTGTACGCCGAGTGGTCGGAGGTCGTGTCCA  
CGAACTTCCGGGACGCCTCCGGGGCCGGCCATGACCGAGATCGGCGAGCA  
GCCGTGGGGGCGGGAGTTCGCCCTGCGCGACCCGGCCGGCAACTGCGTG  
CACTTCGTGGCCGAGGAGCAGGACTGACACGTGCTAAAACCTTCATTTTTAAT  
TTAAAAGGATCTAGGTGAAGATCCTTTTTTGATAATCTCATGACCAAAATCCCT  
TAACGTGAGTTTTTCGTTCCACTGAGCGTCAGACCCCGTAGAAAAGATCAAA  
GGATCTTCTTGAGATCCTTTTTTTCTGCGCGTAATCTGCTGCTTGCAAACAAA  
AAAACCAACCGCTACCAGCGGTGGTTTGTTTGCCGGATCAAGAGCTACCAAC  
TCTTTTTCCGAAGGTAACCTGGCTTCAGCAGAGCGCAGATACCAAATACTGTC  
CTTCTAGTGTAGCCGTAGTTAGGCCACCACTTCAAGAACTCTGTAGCACCG  
CCTACATACCTCGCTCTGCTAATCCTGTTACCAGTGGCTGCTGCCAGTGGC  
GATAAGTCGTGTCTTACCGGGTTGGA CTCAAGACGATAGTTACCGGATAAG  
GCGCAGCGGTCTGGGCTGAACGGGGGGTTCGTGCACACAGCCCAGCTTGG  
AGCGAACGACCTACACCGAACTGAGATACCTACAGCGTGAGCTATGAGAAA  
GCGCCACGCTTCCCGAAGGGAGAAAGGCGGACAGGTATCCGGTAAGCGGC  
AGGGTCGGAACAGGAGAGCGCACGAGGGAGCTTCCAGGGGGAAACGCCT  
GGTATCTTTATAGTCCTGTCTGGGTTTCGCCACCTCTGACTTGAGCGTCGATT  
TTTGTGATGCTCGTCAGGGGGGCGGAGCCTATGGAAAAACGCCAGCAACG  
CGGCCTTTTTACGGTTCCTGGGCTTTTGCTGGCCTTTTGCTCACATGTTCTT  
TCCTGCGTTATCCCCTGATTCTGTGGATAACCGTATTACCGCCTTTGAGTGA  
GCTGATACCGCTCGCCGCAGCCGAACGACCGAGCGCAGCGAGTCAGTGAG  
CGAGGAAGCGGAAGAGCGCCCAATACGCAAACCGCCTCTCCCCGCGCGTT  
GGCCGATTCATTAATGCAGCTGGCACGACAGGTTTCCCGACTGGAAAGCGG  
GCAGTGAGCGCAACGCAATTAATGTGAGTTAGCTCACTCATTAGGCACCCC  
AGGCTTTACACTTTATGCTTCCGGCTCGTATGTTGTGTGGAATTGTGAGCGG  
ATAACAATTTACACAGGAAACAGCTATGACCATGATTACGCCAAGCTATTT  
AGGTGACACTATAGAATACTCAAGCTATGCATCAAGCTTGGTACCGAGCTC  
GGATCCACTAGTAACGGCCGCCAGTGTGCTGGAATTCGCC
