# Supplementary material for: The genome of the Hi5 germ cell line from Trichoplusia ni, an agricultural pest and novel model for small RNA biology
Source: eLife journal article supplement (doi:10.7554/elife.31628), 2018-01-29
Supplement: supp [file elife-31628-supp-v1.zip › elife_poa_e31628_Supplementary_File_10.pdf]

## **Generating single-stranded DNA (ssDNA) donors using Streptavidin-coupled Dynabeads**

The donor for homology-dependent repair is generated by PCR using one standard and one 5' biotinylated primer (IDT). In our hands, Phusion High-Fidelity DNA Polymerase (NEB) works well. PCR clean-up steps are not required.

### **Prepare Dynabeads**

1. Resuspend the Dynabeads M-280 streptavidin (ThermoFisher) by vortexing for 1 min.
2. Dispense resuspended Dynabeads into a 1.5 ml tube. Use a volume equivalent to the volume of the PCR reaction to be purified.
3. Add an equal volume of 2× washing buffer (10 mM Tris-HCl [pH 7.5], 1 mM EDTA, 2 M NaCl) to the Dynabeads then vortex 5 sec.
4. Place the tube on a magnetic stand for 1 min, then discard the supernatant.
5. Remove the tube from the magnetic stand and resuspend the washed Dynabeads in 2× washing buffer using a volume equivalent to the volume of the PCR reaction.

### **Immobilize DNA**

1. Add the crude PCR reaction to the washed Dynabeads.
2. Incubate for 30 min at room temperature with gentle rotation.
3. Place the tube in the magnetic stand for 3 min, remove the supernatant containing unbound DNA (Sup 1) to a new tube.
4. Wash the Dynabeads twice with 500 µl 1× washing buffer, mix by pipetting up and down, then collect the beads in the magnetic stand for 2 min.
5. Remove the washing buffer from above the beads.

### **Denature double-stranded DNA**

1. Add 200 µl 0.1 M NaOH to beads, incubate for 5 min at room temperature to denature the biotinylated PCR product .
2. Put tube back in magnetic stand for 3 min, then remove the supernatant (Sup 2) to a new tube. Sup 2 should contain the non-biotinylated DNA strand.
3. Add equal volume of 2× PK buffer (200 mM Tris-HCl [pH7.5], 300 mM NaCl, 25 mM EDTA, 2% w/v SDS) to Sup 2 to neutralize.
4. Wash the Dynabeads twice with 500 µl 1× washing buffer.
5. Resuspend the Dynabeads in 200 µl 10 mM EDTA (pH 8.2).

### **Release the biotinylated DNA strand**

1. Incubate resuspended Dynabeads at 65°C for 5 min.
2. After incubation, put tube back in magnetic stand for 3 min. Collect the supernatant (Sup 3) in a new tube.

**Analysis and gel purification of ssDNA donor**

1. Add 3 volumes ice-cold absolute ethanol (Decon Laboratories) and 1  $\mu$ l GlycoBlue coprecipitant (Invitrogen) to each supernatant (Sup 1, Sup 2, and Sup3). Incubate on ice for 1 h, then centrifuge at 15,000 $\times$  *g* at 4°C for 30 min. Wash DNA pellet with 70% (v/v) ethanol, centrifuge again at 15,000 $\times$  *g* at 4°C for 5 min to collect pellet. Air dry pellet at room temperature for 5 min. Dissolve pellet in 10  $\mu$ l dH<sub>2</sub>O.
2. Add 2  $\mu$ l 6 $\times$  Orange G loading buffer (2.5% [w/v] Ficoll-400, 0.15% [w/v] Orange G) to each pellet, then analyze 12  $\mu$ l of each sample by agarose gel electrophoresis (1% [w/v] UltraPure [Invitrogen] agarose, 1 $\times$  TAE buffer [40 mM Tris (pH 8.3), 20 mM acetic acid, 1 mM EDTA] plus 1  $\mu$ g/ $\mu$ l ethidium bromide [OmniPur]) in 1 $\times$  TAE buffer at 100 V for 40 min.
3. Excise agarose bands containing the full-length Sup 2 and Sup 3 products. ssDNA will migrate faster than double-stranded DNA of the same length: e.g., a 2,332 bp ssDNA donor runs as if it were ~1 kbp. Extract ssDNA from agarose gel slice using QIAquick Gel Extraction kit (QIAGEN), eluting the ssDNA into water. Store ssDNA donors at –20°C.
